# Supplementary material for: Persistence in risk and effect of COVID-19 vaccination on long-term health consequences after SARS-CoV-2 infection
Source: PubMed Central journal article supplement (PMC10894867; doi:10.1038/s41467-024-45953-1), 2024-02-26
Supplement: 41467_2024_45953_MOESM1_ESM.pdf [file 41467_2024_45953_MOESM1_ESM.pdf]

## Supplementary Material

### Persistence in risk and effect of COVID-19 vaccination on long-term health consequences after SARS-CoV-2 infection

|                                                                                                                                                                                                                                                                                                                                  |    |
|----------------------------------------------------------------------------------------------------------------------------------------------------------------------------------------------------------------------------------------------------------------------------------------------------------------------------------|----|
| Supplementary Table 1. Full disease diagnosis codes for health outcomes following SARS-CoV-2 infection and pre-existing morbidities.....                                                                                                                                                                                         | 3  |
| Supplementary Table 2. Baseline characteristics of patients with COVID-19 identified by a positive laboratory confirmed polymerase chain reaction COVID-19 screening test result stratified by vaccine status and controls from the Hong Kong Hospital Authority before propensity-score weighting ...                           | 5  |
| Supplementary Table 3. Incidence rate and hazard ratio of clinical sequelae in COVID-19 and non-COVID-19 cohort after weighting during 0-30, 31-90, 91-180, 181-270, 271-365 days of SARS-CoV-2 infection (Patients with a positive laboratory confirmed polymerase chain reaction COVID-19 screening test result).....          | 7  |
| Supplementary Table 4. Baseline characteristics of patients with COVID-19 from the Omicron wave in Hong Kong stratified by vaccine status and controls from the Hong Kong Hospital Authority before propensity-score weighting. ....                                                                                             | 12 |
| Supplementary Table 5. Incidence rate and hazard ratio of clinical sequelae in COVID-19 and non-COVID-19 cohort after weighting during 0-30, 31-90, 91-180, 181-270,271-365 days of SARS-CoV-2 infection (Cases of SARS-COV-2 infection from the Omicron wave in Hong Kong) .....                                                | 14 |
| Supplementary Table 6. Baseline characteristics of unvaccinated patients with COVID-19 and matched control with the same vaccination status from the Hong Kong Hospital Authority before propensity-score weighting. ....                                                                                                        | 19 |
| Supplementary Table 7. Incidence rate and hazard ratio of clinical sequelae in COVID-19 and non-COVID-19 cohort after weighting during 0-30, 31-90, 91-180, 181-270,271-365 days of SARS-CoV-2 infection (unvaccinated patients with COVID-19 and matched control with the same vaccination status) .....                        | 21 |
| Supplementary Table 8. Baseline characteristics of patients with SARS-CoV-2 infection less than 6 months after the date of last dose of vaccination stratified by vaccine status and controls from the Hong Kong Hospital Authority before propensity-score weighting. ....                                                      | 24 |
| Supplementary Table 9. Incidence rate and hazard ratio of clinical sequelae in COVID-19 and non-COVID-19 cohort after weighting during 0-30, 31-90, 91-180, 181-270,271-365 days of SARS-CoV-2 infection (Excluding patients with incident SARS-CoV-2 infection over 6 months after the last dose of COVID-19 vaccination) ..... | 26 |
| Supplementary Table 10. Incidence rate and hazard ratio of clinical sequelae in COVID-19 and non-COVID-19 cohort after weighting during 0-30, 31-90, 91-180, 181-270,271-365 days of SARS-CoV-2 infection (Adjusting for the likely variant of SARS-COV-2 responsible for the infection).....                                    | 31 |
| Supplementary Table 11. P-value, rank and critical values of clinical sequelae estimated by the Benjamini–Hochberg procedure.....                                                                                                                                                                                                | 36 |
| Supplementary Table 12. Incidence rate and hazard ratio of lung cancer, brain cancer and lymphoma in COVID-19 and non-COVID-19 cohort after weighting during 0-30, 31-90, 91-180, 181-270, 271-365 days of SARS-CoV-2 infection.....                                                                                             | 41 |
| Supplementary Table 13. Incidence rate and hazard ratio of clinical sequelae in COVID-19 and non-COVID-19 cohort after weighting during 0-30, 31-90, 91-180, 181-270, 271-365 days of SARS-CoV-2 infection (Patients aged over 65).....                                                                                          | 42 |

|                                                                                                                                                                                                                                                                 |    |
|-----------------------------------------------------------------------------------------------------------------------------------------------------------------------------------------------------------------------------------------------------------------|----|
| Supplementary Table 14. Incidence rate and hazard ratio of clinical sequelae in COVID-19 and non-COVID-19 cohort after weighting during 0-30, 31-90, 91-180, 181-270, 271-365 days of SARS-CoV-2 infection (Patients aged 65 or under).....                     | 47 |
| Supplementary Table 15. Incidence rate and hazard ratio of clinical sequelae in COVID-19 and non-COVID-19 cohort after weighting during 0-30, 31-90, 91-180, 181-270, 271-365 days of SARS-CoV-2 infection (Patients with Charlson Co-morbidity Index <4).....  | 52 |
| Supplementary Table 16. Incidence rate and hazard ratio of clinical sequelae in COVID-19 and non-COVID-19 cohort after weighting during 0-30, 31-90, 91-180, 181-270, 271-365 days of SARS-CoV-2 infection (Patients with Charlson Co-morbidity Index >=4)..... | 57 |
| Supplementary Table 17. Incidence rate and hazard ratio of clinical sequelae in COVID-19 and non-COVID-19 cohort after weighting during 0-30, 31-90, 91-180, 181-270, 271-365 days of SARS-CoV-2 infection (Male patients) .....                                | 62 |
| Supplementary Table 18. Incidence rate and hazard ratio of clinical sequelae in COVID-19 and non-COVID-19 cohort after weighting during 0-30, 31-90, 91-180, 181-270, 271-365 days of SARS-CoV-2 infection (Female patients).....                               | 67 |
| Supplementary Figure 1. Cumulative incidence plot for clinical sequelae during 0-30, 31-90, 91-180, 181-270, 271-365 days of SARS-CoV-2 infection .....                                                                                                         | 72 |

**Supplementary Table 1. Full disease diagnosis codes for health outcomes following SARS-CoV-2 infection and pre-existing morbidities**

| <b>Disease</b>                                                | <b>ICD-9-CM</b>                                                                           |
|---------------------------------------------------------------|-------------------------------------------------------------------------------------------|
| <b>Health outcomes following SARS-CoV-2</b>                   |                                                                                           |
| Myocardial infarction                                         | 410                                                                                       |
| Heart failure                                                 | 428.398-91,402-01,402-11,402-91,404-01,404-03, 404-11,404-13,404-91,404-93                |
| Stroke                                                        | 430-438                                                                                   |
| Atrial fibrillation                                           | 427-3                                                                                     |
| Coronary artery disease                                       | 410-414, 36-0, 36-1                                                                       |
| Deep vein thrombosis                                          | 453                                                                                       |
| Acute respiratory distress syndrome                           | 518-8x, 518-51-518-53                                                                     |
| Chronic pulmonary disease                                     | 490-496                                                                                   |
| Seizure                                                       | 333-2, 345, 649-4, 780-3, 779-0, 780-3                                                    |
| Pancreatitis                                                  | 577-0, 577-1                                                                              |
| Acute kidney injury                                           | 584-5-584-9                                                                               |
| End-stage renal disease                                       | 585-6, 586                                                                                |
| Lung cancer                                                   | 162-164, 197                                                                              |
| Brain cancer                                                  | 191                                                                                       |
| Lymphoma                                                      | 200-209                                                                                   |
| <b>Pre-existing morbidities</b>                               |                                                                                           |
| Diabetes                                                      | 250                                                                                       |
| Cardiovascular disease                                        | 398-91, 401-405, 410-412, 425-4, 425-5, 425-7-425-9, 427-3, 428, 433, 434, 436-438, 453-8 |
| Dementia                                                      | 290                                                                                       |
| Congestive heart failure                                      | 398-91, 402-01, 402-11, 402-91, 404-01, 404-03, 404-11, 404-13, 404-91, 404-93, 428       |
| Peripheral vascular disease                                   | 441, 443-9, 785-4                                                                         |
| Cerebrovascular disease                                       | 430-438                                                                                   |
| Rheumatoid arthritis and other inflammatory polyarthropathies | 710-0, 710-1, 710-4, 714-0, 714-1, 714-2, 714-81, 725                                     |
| Chronic pulmonary disease                                     | 490-496, 500-505, 506-4                                                                   |
| Hemiplegia or paraplegia                                      | 342, 344-1                                                                                |
| Chronic renal failure                                         | 582, 585, 586, 588, 583-0-583-2, 583-4, 583-6, 583-7                                      |

**Supplementary Table 1. Full disease diagnosis codes for health outcomes following SARS-CoV-2 infection and pre-existing morbidities (Continued)**

| <b>Disease</b>                         | <b>ICD-9-CM</b>                                                                   |
|----------------------------------------|-----------------------------------------------------------------------------------|
| Liver disease, mild                    | 571·2, 571·4-571·6                                                                |
| Diabetes without chronic complications | 250·0-250·3, 250·7                                                                |
| Diabetes with chronic complications    | 250·4-250·6                                                                       |
| Ulcers                                 | 531-534                                                                           |
| Metastatic solid tumour                | 196-199                                                                           |
| Malignancy                             | 140-149, 150-159, 180-189, 170-172, 174, 175, 176, 179, 160-165, 190-195, 200-208 |
| Liver disease, moderate to severe      | 456·0-456·2, 572·2-572·4, 572·8                                                   |
| Cancer                                 | 140-149, 150-159, 180-189, 170-172, 174-176, 179, 160-165, 190-195, 200-208       |
| Chronic Kidney Disease                 | 582, 585, 586, 588, 583·0-583·2, 583·4, 583·6, 583·7                              |
| Respiratory disease                    | 416·8, 416·9, 490-496, 500-505, 506·4, 508·1, 508·8                               |

Note: ICD-9-CM: International Classification of Diseases, Ninth Revision, clinical modification

**Supplementary Table 2. Baseline characteristics of patients with COVID-19 identified by a positive laboratory confirmed polymerase chain reaction COVID-19 screening test result stratified by vaccine status and controls from the Hong Kong Hospital Authority before propensity-score weighting**

| Baseline characteristics                                      | Hong Kong Hospital Authority<br>(April 1st, 2020 to October 31st, 2022) |                             |                                         |                                  |                                          | SMD <sup>b</sup> |
|---------------------------------------------------------------|-------------------------------------------------------------------------|-----------------------------|-----------------------------------------|----------------------------------|------------------------------------------|------------------|
|                                                               | Controls<br>(N=1,599,711)                                               | COVID-19                    |                                         |                                  |                                          |                  |
|                                                               |                                                                         | Un-vaccinated<br>(N=89,246) | Incomplete<br>vaccination<br>(N=64,208) | Fully vaccinated<br>(N= 303,213) | Received booster<br>dose<br>(N= 248,478) |                  |
|                                                               | N / Mean (% / SD)                                                       | N / Mean (% / SD)           | N / Mean (% / SD)                       | N / Mean (% / SD)                | N / Mean (% / SD)                        |                  |
| Age (years)                                                   | 56.2 (18.03)                                                            | 61.9 (21.78)                | 61.0 (19.57)                            | 50.9 (17.49)                     | 54.4 (15.66)                             | 0.306            |
| Sex, male                                                     | 737,158 (46.1)                                                          | 41,886 (46.9)               | 30,549 (47.6)                           | 140,764 (46.4)                   | 120,899 (48.7)                           | 0.025            |
| Charlson Comorbidity Index                                    | 1.80 (1.83)                                                             | 2.83 (2.60)                 | 2.55 (2.25)                             | 1.39 (1.72)                      | 1.53 (1.64)                              | 0.375            |
| <b>Pre-existing morbidities</b>                               |                                                                         |                             |                                         |                                  |                                          |                  |
| Respiratory disease                                           | 31,209 (2.0)                                                            | 4,807 (5.4)                 | 2,701 (4.2)                             | 5,997 (2.0)                      | 4,689 (1.9)                              | 0.102            |
| Diabetes                                                      | 196,566 (12.3)                                                          | 16,591 (18.6)               | 12,676 (19.7)                           | 34,697 (11.4)                    | 27,746 (11.2)                            | 0.136            |
| Cardiovascular disease                                        | 131,334 (8.2)                                                           | 18,901 (21.2)               | 10,236 (15.9)                           | 19,408 (6.4)                     | 15,924 (6.4)                             | 0.238            |
| Myocardial Infarction                                         | 11,830 (0.7)                                                            | 2,495 (2.8)                 | 1,039 (1.6)                             | 1,919 (0.6)                      | 1,388 (0.6)                              | 0.090            |
| Chronic heart failure                                         | 16,446 (1.0)                                                            | 4,846 (5.4)                 | 1,951 (3.0)                             | 2,618 (0.9)                      | 1,644 (0.7)                              | 0.147            |
| Peripheral vascular disease                                   | 4,597 (0.3)                                                             | 1,016 (1.1)                 | 428 (0.7)                               | 590 (0.2)                        | 478 (0.2)                                | 0.062            |
| Cerebrovascular disease                                       | 60,849 (3.8)                                                            | 10,109 (11.3)               | 5,132 (8.0)                             | 8,876 (2.9)                      | 6,599 (2.7)                              | 0.185            |
| COPD                                                          | 31,102 (1.9)                                                            | 4,777 (5.4)                 | 2,687 (4.2)                             | 5,983 (2.0)                      | 4,681 (1.9)                              | 0.101            |
| Dementia                                                      | 4,846 (0.3)                                                             | 2,211 (2.5)                 | 898 (1.4)                               | 876 (0.3)                        | 413 (0.2)                                | 0.109            |
| Paralysis                                                     | 3,561 (0.2)                                                             | 875 (1.0)                   | 330 (0.5)                               | 535 (0.2)                        | 320 (0.1)                                | 0.059            |
| Diabetes without chronic complication                         | 187,911 (11.7)                                                          | 15,257 (17.1)               | 11,935 (18.6)                           | 33,255 (11.0)                    | 26,715 (10.8)                            | 0.125            |
| Diabetes with chronic complication                            | 12,603 (0.8)                                                            | 2,069 (2.3)                 | 1,104 (1.7)                             | 2,187 (0.7)                      | 1,551 (0.6)                              | 0.075            |
| Chronic Kidney Disease                                        | 19,741 (1.2)                                                            | 4,223 (4.7)                 | 2,048 (3.2)                             | 3,214 (1.1)                      | 2,521 (1.0)                              | 0.121            |
| Mild liver disease                                            | 2,369 (0.1)                                                             | 438 (0.5)                   | 191 (0.3)                               | 460 (0.2)                        | 306 (0.1)                                | 0.033            |
| Moderate-severe liver disease                                 | 1,563 (0.1)                                                             | 345 (0.4)                   | 132 (0.2)                               | 346 (0.1)                        | 205 (0.1)                                | 0.031            |
| Ulcers                                                        | 16,784 (1.0)                                                            | 2,269 (2.5)                 | 1,262 (2.0)                             | 3,055 (1.0)                      | 2,394 (1.0)                              | 0.064            |
| Rheumatoid arthritis and other inflammatory polyarthropathies | 6,444 (0.4)                                                             | 676 (0.8)                   | 415 (0.6)                               | 1,206 (0.4)                      | 1,001 (0.4)                              | 0.026            |
| Acquired Immune Deficiency Syndrome (AIDS)                    | 2 (0.0)                                                                 | 0 (0.0)                     | 0 (0.0)                                 | 0 (0.0)                          | 0 (0.0)                                  | 0.001            |
| Malignancy                                                    | 47,736 (3.0)                                                            | 5,764 (6.5)                 | 3,510 (5.5)                             | 7,911 (2.6)                      | 5,976 (2.4)                              | 0.109            |

|                                            |                |                |                |                 |                 |       |
|--------------------------------------------|----------------|----------------|----------------|-----------------|-----------------|-------|
| Metastatic solid tumour                    | 7,566 (0.5)    | 1,445 (1.6)    | 717 (1.1)      | 1,305 (0.4)     | 792 (0.3)       | 0.070 |
| <b>Medication history</b>                  |                |                |                |                 |                 |       |
| Renin-angiotensin-system agents            | 239,892 (15.0) | 20,662 (23.2)  | 15,413 (24.0)  | 41,080 (13.5)   | 34,314 (13.8)   | 0.157 |
| Beta blockers                              | 151,174 (9.5)  | 15,373 (17.2)  | 10,640 (16.6)  | 25,550 (8.4)    | 19,690 (7.9)    | 0.163 |
| Calcium channel blockers                   | 338,241 (21.1) | 27,343 (30.6)  | 20,777 (32.4)  | 58,106 (19.2)   | 48,538 (19.5)   | 0.174 |
| Diuretics                                  | 50,242 (3.1)   | 9,656 (10.8)   | 4,704 (7.3)    | 8,521 (2.8)     | 6,378 (2.6)     | 0.177 |
| Nitrates                                   | 37,099 (2.3)   | 5,911 (6.6)    | 3,115 (4.9)    | 5,782 (1.9)     | 4,904 (2.0)     | 0.127 |
| Lipid lowering agents                      | 347,668 (21.7) | 26,742 (30.0)  | 20,715 (32.3)  | 56,458 (18.6)   | 50,766 (20.4)   | 0.171 |
| Insulins                                   | 27,766 (1.7)   | 4,836 (5.4)    | 2,521 (3.9)    | 5,138 (1.7)     | 3,582 (1.4)     | 0.116 |
| Antidiabetic drugs                         | 181,371 (11.3) | 14,770 (16.5)  | 12,031 (18.7)  | 33,368 (11.0)   | 26,794 (10.8)   | 0.123 |
| Oral anticoagulants                        | 20,176 (1.3)   | 3,869 (4.3)    | 1,946 (3.0)    | 2,938 (1.0)     | 2,262 (0.9)     | 0.117 |
| Antiplatelets                              | 135,488 (8.5)  | 17,449 (19.6)  | 10,370 (16.2)  | 20,919 (6.9)    | 17,487 (7.0)    | 0.210 |
| Immunosuppressants                         | 7,060 (0.4)    | 986 (1.1)      | 560 (0.9)      | 1,366 (0.5)     | 1,250 (0.5)     | 0.041 |
| <b>Number of past healthcare visits</b>    |                |                |                |                 |                 |       |
| Hospital admission                         | 0.3 (2.0)      | 1.5 (6.1)      | 1.0 (5.6)      | 0.4 (2.9)       | 0.3 (3.1)       | 0.130 |
| Doctor consultation                        | 2.8 (3.8)      | 4.0 (5.1)      | 4.3 (4.8)      | 3.0 (4.1)       | 2.9 (3.9)       | 0.187 |
| <b>Doses of COVID-19 vaccines received</b> |                |                |                |                 |                 |       |
| 0                                          | 289,728 (18.1) | 89,246 (100.0) | 0 (0.0)        | 0 (0.0)         | 0 (0.0)         |       |
| 1                                          | 136,684 (8.5)  | 0 (0.0)        | 64,208 (100.0) | 0 (0.0)         | 0 (0.0)         |       |
| 2                                          | 605,296 (37.8) | 0 (0.0)        | 0 (0.0)        | 303,213 (100.0) | 0 (0.0)         |       |
| 3 or above                                 | 568,003 (35.5) | 0 (0.0)        | 0 (0.0)        | 0 (0.0)         | 248,478 (100.0) |       |

Note: SMD: Standard mean difference; COPD: Chronic obstructive pulmonary disease  
Age, Charlson Comorbidity Index, Inpatient hospital and Specialist and general outpatient visit are presented in mean  $\pm$  SD  
SMD  $\leq$  0.1 is considered good balance between cohorts

**Supplementary Table 3. Incidence rate and hazard ratio of clinical sequelae in COVID-19 and non-COVID-19 cohort after weighting during 0-30, 31-90, 91-180, 181-270, 271-365 days of SARS-CoV-2 infection (Patients with a positive laboratory confirmed polymerase chain reaction COVID-19 screening test result)**

**0-30 days**

| Clinical sequelae                   | Controls (REF) |                                  |        | COVID-19                         |                        |        |                                  |                        |        |                                  |                  |       |                                  |                  |
|-------------------------------------|----------------|----------------------------------|--------|----------------------------------|------------------------|--------|----------------------------------|------------------------|--------|----------------------------------|------------------|-------|----------------------------------|------------------|
|                                     | Event          | Incidence per 1,000 person-years | Event  | Unvaccinated                     |                        |        | Received single dose             |                        |        | Received two doses               |                  |       | Received booster dose(s)         |                  |
|                                     |                |                                  | Event  | Incidence per 1,000 person-years | Hazard ratio           | Event  | Incidence per 1,000 person-years | Hazard ratio           | Event  | Incidence per 1,000 person-years | Hazard ratio     | Event | Incidence per 1,000 person-years | Hazard ratio     |
| Major CVD                           | 832            | 4.64 (4.33,4.96)                 | 4,969  | 28.76<br>(27.97,29.56)           | 6.16 (5.25,7.22)       | 3,753  | 21.48<br>(20.80,22.17)           | 4.61 (3.79,5.61)       | 2,971  | 16.71<br>(16.12,17.32)           | 3.60 (3.11,4.16) | 2,638 | 14.71<br>(14.16,15.28)           | 3.17 (2.70,3.72) |
| Stroke                              | 531            | 2.82 (2.59,3.07)                 | 3,017  | 16.73<br>(16.14,17.33)           | 5.87 (4.73,7.29)       | 2,272  | 12.43<br>(11.93,12.95)           | 4.38 (3.38,5.68)       | 2,078  | 11.17<br>(10.69,11.65)           | 3.95 (3.25,4.79) | 1,760 | 9.33 (8.90,9.78)                 | 3.31 (2.65,4.13) |
| Myocardial infarction               | 194            | 1.00 (0.86,1.14)                 | 1,631  | 8.65 (8.24,9.08)                 | (6.54,11.30)           | 1,420  | 7.47 (7.09,7.87)                 | (5.35,10.40)           | 930    | 4.83 (4.53,5.15)                 | 4.84 (3.64,6.43) | 956   | 4.90 (4.60,5.22)                 | 4.92 (3.71,6.52) |
| Heart Failure                       | 193            | 1.00 (0.87,1.15)                 | 1,082  | 5.78 (5.44,6.13)                 | 5.76 (4.20,7.90)       | 854    | 4.52 (4.22,4.83)                 | 4.51 (3.09,6.60)       | 557    | 2.91 (2.68,3.16)                 | 2.91 (2.07,4.08) | 389   | 2.00 (1.81,2.21)                 | 2.00 (1.34,3.01) |
| Atrial fibrillation                 | 99             | 0.51 (0.42,0.62)                 | 565    | 3.04 (2.80,3.30)                 | 5.90 (3.81,9.12)       | 482    | 2.57 (2.35,2.81)                 | 5.00 (3.04,8.25)       | 349    | 1.83 (1.65,2.03)                 | 3.57 (2.32,5.50) | 483   | 2.50 (2.29,2.73)                 | 4.88 (3.33,7.15) |
| Coronary Artery Disease             | 295            | 1.57 (1.40,1.75)                 | 1,810  | 9.88 (9.43,10.35)                | 6.25 (4.84,8.05)       | 1,559  | 8.47 (8.06,8.90)                 | 5.38 (3.97,7.28)       | 1,161  | 6.23 (5.88,6.60)                 | 3.96 (3.12,5.04) | 1,067 | 5.68 (5.34,6.03)                 | 3.62 (2.82,4.64) |
| Deep vein thrombosis                | 33             | 0.17 (0.12,0.24)                 | 204    | 1.08 (0.94,1.23)                 | (2.81,14.23)           | 202    | 1.06 (0.92,1.21)                 | (2.68,14.51)           | 92     | 0.47 (0.38,0.58)                 | 2.79 (1.17,6.65) | 74    | 0.37 (0.30,0.47)                 | 2.21 (0.91,5.37) |
| Cardiovascular mortality            | 796            | 4.06 (3.78,4.35)                 | 5,105  | 26.84<br>(26.11,27.58)           | 6.57 (5.64,7.65)       | 3,002  | 15.67<br>(15.11,16.23)           | 3.85 (3.14,4.72)       | 1,917  | 9.87<br>(9.44,10.32)             | 2.43 (2.01,2.94) | 1,100 | 5.59 (5.26,5.93)                 | 1.38 (1.04,1.82) |
| Chronic pulmonary disease           | 74             | 0.39 (0.31,0.48)                 | 317    | 1.71 (1.53,1.91)                 | 4.41 (2.51,7.74)       | 650    | 3.48 (3.22,3.76)                 | (5.19,15.59)           | 372    | 1.96 (1.77,2.17)                 | 5.07 (3.24,7.95) | 244   | 1.27 (1.12,1.44)                 | 3.30 (2.02,5.38) |
| Acute respiratory distress syndrome | 128            | 0.66 (0.55,0.78)                 | 1,227  | 6.51 (6.15,6.88)                 | (6.89,14.01)           | 705    | 3.71 (3.44,3.99)                 | 5.61 (3.63,8.68)       | 410    | 2.12 (1.92,2.33)                 | 3.22 (2.17,4.78) | 480   | 2.45 (2.24,2.68)                 | 3.73 (2.56,5.44) |
| Seizure                             | 71             | 0.36 (0.28,0.45)                 | 648    | 3.46 (3.20,3.74)                 | (5.82,15.42)           | 489    | 2.58 (2.36,2.82)                 | (3.79,13.27)           | 194    | 1.00 (0.87,1.15)                 | 2.77 (1.63,4.68) | 236   | 1.21 (1.06,1.37)                 | 3.33 (1.70,6.50) |
| End-stage renal disease             | 17             | 0.09 (0.05,0.13)                 | 208    | 1.10 (0.96,1.25)                 | (5.49,28.66)           | 55     | 0.29 (0.22,0.37)                 | (0.81,13.74)           | 89     | 0.46 (0.37,0.56)                 | (2.12,13.29)     | 90    | 0.46 (0.37,0.56)                 | (1.28,21.92)     |
| Acute kidney injury                 | 57             | 0.29 (0.23,0.38)                 | 676    | 3.58 (3.32,3.86)                 | (7.69,19.29)           | 803    | 4.22 (3.93,4.52)                 | (8.73,23.66)           | 305    | 1.58 (1.41,1.76)                 | 5.38 (3.21,9.04) | 381   | 1.95 (1.76,2.15)                 | (3.98,11.12)     |
| Pancreatitis                        | 35             | 0.18 (0.12,0.24)                 | 235    | 1.24 (1.09,1.41)                 | (3.26,14.79)           | 135    | 0.71 (0.59,0.83)                 | (1.25,12.51)           | 125    | 0.64 (0.54,0.76)                 | 3.62 (1.75,7.47) | 138   | 0.70 (0.59,0.82)                 | 3.94 (2.03,7.66) |
| All-cause mortality                 | 4,137          | 21.09<br>(20.46,21.74)           | 82,112 | 431.67<br>(428.72,434.63)        | 20.37<br>(19.20,21.62) | 43,871 | 228.94<br>(226.80,231.09)        | 10.83<br>(10.09,11.62) | 19,499 | 100.37<br>(98.97,101.78)         | 4.75 (4.42,5.12) | 9,190 | 46.66<br>(45.71,47.62)           | 2.21 (1.96,2.50) |

Note: CI: confidence interval, REF: Reference group; Major CVD: Major Cardiovascular Disease; Composite outcome of stroke, heart failure and coronary artery disease

Hazard Ratio (HR) and 95% Confidence Interval (95% CI) were estimated by Cox regression. HR >1 (or <1) indicates patients with COVID-19 had higher (lower) risk of sequelae compared to the non-COVID-19 control cohort

Un-vaccinated, Incomplete vaccinated, Fully Vaccinated and Received booster dose of COVID-19 vaccines refers to patients who have received 0 dose, 1 doses, 2 doses and ≥3 doses of BioNtech or CoronaVac COVID-19 vaccines, respectively

**Supplementary Table 3. Incidence rate and hazard ratio of clinical sequelae in COVID-19 and non-COVID-19 cohort after weighting during 0-30, 31-90, 91-180, 181-270, 271-365 days of SARS-CoV-2 infection (Patients with a positive laboratory confirmed polymerase chain reaction COVID-19 screening test result, continued)**

**31-90 days**

| Clinical sequelae                   | Controls (REF) |                                  |        | COVID-19                         |                  |                      |                                  |                    |       |                                  |                  |       |                                  |                  |
|-------------------------------------|----------------|----------------------------------|--------|----------------------------------|------------------|----------------------|----------------------------------|--------------------|-------|----------------------------------|------------------|-------|----------------------------------|------------------|
|                                     | Event          | Incidence per 1,000 person-years | Event  | Unvaccinated                     |                  | Received single dose |                                  | Received two doses |       | Received booster dose(s)         |                  |       |                                  |                  |
|                                     |                |                                  | Event  | Incidence per 1,000 person-years | Hazard ratio     | Event                | Incidence per 1,000 person-years | Hazard ratio       | Event | Incidence per 1,000 person-years | Hazard ratio     | Event | Incidence per 1,000 person-years | Hazard ratio     |
| Major CVD                           | 1,989          | 5.66 (5.41,5.91)                 | 4,078  | 12.15<br>(11.78,12.53)           | 2.15 (1.83,2.53) | 3,193                | 9.33 (9.01,9.65)                 | 1.65 (1.35,2.01)   | 2,237 | 6.43 (6.17,6.70)                 | 1.14 (0.98,1.31) | 2,397 | 6.85 (6.58,7.13)                 | 1.21 (1.05,1.39) |
| Stroke                              | 1,115          | 3.03 (2.86,3.21)                 | 1,891  | 5.39 (5.15,5.64)                 | 1.78 (1.41,2.25) | 1,898                | 5.30 (5.07,5.54)                 | 1.75 (1.34,2.28)   | 1,181 | 3.25 (3.07,3.44)                 | 1.07 (0.88,1.31) | 1,121 | 3.05 (2.88,3.23)                 | 1.01 (0.82,1.24) |
| Myocardial infarction               | 453            | 1.19 (1.09,1.31)                 | 839    | 2.28 (2.13,2.44)                 | 1.91 (1.39,2.64) | 450                  | 1.21 (1.10,1.33)                 | 1.01 (0.59,1.73)   | 490   | 1.30 (1.19,1.42)                 | 1.09 (0.80,1.49) | 499   | 1.31 (1.20,1.44)                 | 1.10 (0.79,1.53) |
| Heart Failure                       | 488            | 1.29 (1.18,1.41)                 | 1,813  | 4.97 (4.75,5.21)                 | 3.86 (3.06,4.86) | 887                  | 2.39 (2.24,2.56)                 | 1.86 (1.32,2.61)   | 837   | 2.23 (2.09,2.39)                 | 1.73 (1.33,2.26) | 772   | 2.04 (1.90,2.19)                 | 1.58 (1.15,2.18) |
| Atrial fibrillation                 | 318            | 0.84 (0.75,0.94)                 | 858    | 2.37 (2.22,2.53)                 | 2.81 (2.02,3.91) | 532                  | 1.45 (1.33,1.57)                 | 1.71 (1.09,2.71)   | 405   | 1.09 (0.99,1.20)                 | 1.29 (0.92,1.81) | 368   | 0.98 (0.88,1.08)                 | 1.16 (0.79,1.70) |
| Coronary Artery Disease             | 798            | 2.17 (2.03,2.33)                 | 1,601  | 4.49 (4.27,4.71)                 | 2.06 (1.61,2.65) | 886                  | 2.46 (2.30,2.62)                 | 1.13 (0.79,1.62)   | 960   | 2.64 (2.47,2.81)                 | 1.21 (0.97,1.52) | 1,109 | 3.03 (2.86,3.21)                 | 1.39 (1.13,1.72) |
| Deep vein thrombosis                | 82             | 0.22 (0.17,0.27)                 | 337    | 0.91 (0.82,1.01)                 | 4.23 (2.35,7.62) | 223                  | 0.60 (0.52,0.68)                 | 2.76 (1.38,5.53)   | 156   | 0.41 (0.35,0.48)                 | 1.91 (1.05,3.47) | 45    | 0.12 (0.09,0.15)                 | 0.54 (0.22,1.37) |
| Cardiovascular mortality            | 927            | 2.42 (2.27,2.58)                 | 2,029  | 5.48 (5.24,5.72)                 | 2.26 (1.84,2.78) | 1,118                | 2.98 (2.81,3.16)                 | 1.23 (0.92,1.64)   | 1,028 | 2.71 (2.55,2.88)                 | 1.12 (0.88,1.42) | 615   | 1.60 (1.48,1.73)                 | 0.66 (0.46,0.96) |
| Chronic pulmonary disease           | 209            | 0.55 (0.48,0.63)                 | 620    | 1.72 (1.59,1.86)                 | 3.09 (2.04,4.68) | 450                  | 1.23 (1.12,1.35)                 | 2.22 (1.22,4.01)   | 318   | 0.86 (0.77,0.95)                 | 1.54 (1.03,2.31) | 179   | 0.48 (0.41,0.55)                 | 0.86 (0.51,1.45) |
| Acute respiratory distress syndrome | 328            | 0.86 (0.77,0.96)                 | 759    | 2.07 (1.93,2.22)                 | 2.40 (1.64,3.53) | 687                  | 1.84 (1.71,1.98)                 | 2.14 (1.37,3.35)   | 556   | 1.47 (1.35,1.60)                 | 1.71 (1.26,2.33) | 580   | 1.52 (1.40,1.65)                 | 1.77 (1.20,2.61) |
| Seizure                             | 190            | 0.50 (0.43,0.57)                 | 486    | 1.33 (1.22,1.45)                 | 2.66 (1.58,4.47) | 481                  | 1.29 (1.18,1.41)                 | 2.59 (1.44,4.67)   | 225   | 0.60 (0.52,0.68)                 | 1.19 (0.76,1.87) | 189   | 0.50 (0.43,0.57)                 | 0.99 (0.54,1.83) |
| End-stage renal disease             | 50             | 0.13 (0.10,0.17)                 | 87     | 0.24 (0.19,0.29)                 | 1.81 (0.60,5.46) | 134                  | 0.36 (0.30,0.42)                 | 2.75 (0.97,7.80)   | 60    | 0.16 (0.12,0.20)                 | 1.22 (0.46,3.23) | 17    | 0.04 (0.03,0.07)                 | 0.33 (0.08,1.45) |
| Acute kidney injury                 | 142            | 0.37 (0.32,0.44)                 | 607    | 1.65 (1.52,1.79)                 | 4.41 (2.89,6.74) | 403                  | 1.08 (0.98,1.19)                 | 2.89 (1.60,5.21)   | 219   | 0.58 (0.51,0.66)                 | 1.55 (0.92,2.62) | 209   | 0.55 (0.48,0.63)                 | 1.47 (0.81,2.66) |
| Pancreatitis                        | 93             | 0.24 (0.20,0.30)                 | 361    | 0.98 (0.88,1.08)                 | 4.01 (2.14,7.49) | 197                  | 0.53 (0.46,0.60)                 | 2.15 (0.95,4.91)   | 90    | 0.24 (0.19,0.29)                 | 0.97 (0.46,2.03) | 108   | 0.28 (0.23,0.34)                 | 1.15 (0.60,2.22) |
| All-cause mortality                 | 5,467          | 14.27<br>(13.89,14.65)           | 23,694 | 63.95<br>(63.14,64.76)           | 4.47 (4.17,4.79) | 11,685               | 31.13<br>(30.57,31.70)           | 2.18 (1.97,2.41)   | 7,377 | 19.44<br>(19.00,19.89)           | 1.36 (1.24,1.49) | 5,930 | 15.47<br>(15.08,15.87)           | 1.08 (0.94,1.25) |

Note: CI: confidence interval, REF: Reference group; Major CVD: Major Cardiovascular Disease; Composite outcome of stroke, heart failure and coronary artery disease

Hazard Ratio (HR) and 95% Confidence Interval (95% CI) were estimated by Cox regression, HR >1 (or <1) indicates patients with COVID-19 had higher (lower) risk of sequelae compared to the non-COVID-19 control cohort

Un-vaccinated, Incomplete vaccinated, Fully Vaccinated and Received booster dose of COVID-19 vaccines refers to patients who have received 0 dose, 1 doses, 2 doses and ≥3 doses of BioNtech or CoronaVac COVID-19 vaccines, respectively



**Supplementary Table 3. Incidence rate and hazard ratio of clinical sequelae in COVID-19 and non-COVID-19 cohort after weighting during 0-30, 31-90, 91-180, 181-270, 271-365 days of SARS-CoV-2 infection (Patients with a positive laboratory confirmed polymerase chain reaction COVID-19 screening test result, continued)**

**91-180 days**

| Clinical sequelae                   | Controls (REF) |                                  | COVID-19     |                                  |                  |                      |                                  |                  |                    |                                  |                  |                          |                                  |                  |
|-------------------------------------|----------------|----------------------------------|--------------|----------------------------------|------------------|----------------------|----------------------------------|------------------|--------------------|----------------------------------|------------------|--------------------------|----------------------------------|------------------|
|                                     | Event          | Incidence per 1,000 person-years | Unvaccinated |                                  |                  | Received single dose |                                  |                  | Received two doses |                                  |                  | Received booster dose(s) |                                  |                  |
|                                     |                |                                  | Event        | Incidence per 1,000 person-years | Hazard ratio     | Event                | Incidence per 1,000 person-years | Hazard ratio     | Event              | Incidence per 1,000 person-years | Hazard ratio     | Event                    | Incidence per 1,000 person-years | Hazard ratio     |
| Major CVD                           | 2,869          | 5.97 (5.75,6.19)                 | 4,165        | 8.63 (8.37,8.90)                 | 1.45 (1.23,1.71) | 4,187                | 8.32 (8.07,8.58)                 | 1.40 (1.17,1.68) | 3,171              | 6.27 (6.05,6.49)                 | 1.05 (0.94,1.19) | 2,376                    | 5.59 (5.37,5.82)                 | 0.93 (0.81,1.07) |
| Stroke                              | 1,664          | 3.31 (3.15,3.47)                 | 2,038        | 4.04 (3.86,4.21)                 | 1.22 (0.97,1.54) | 2,190                | 4.16 (3.99,4.34)                 | 1.26 (0.98,1.62) | 1,730              | 3.27 (3.12,3.43)                 | 0.99 (0.84,1.17) | 1,127                    | 2.54 (2.39,2.69)                 | 0.76 (0.62,0.92) |
| Myocardial infarction               | 643            | 1.24 (1.15,1.34)                 | 967          | 1.83 (1.71,1.94)                 | 1.47 (1.05,2.06) | 894                  | 1.63 (1.53,1.74)                 | 1.32 (0.90,1.94) | 601                | 1.10 (1.01,1.19)                 | 0.89 (0.67,1.18) | 657                      | 1.44 (1.33,1.55)                 | 1.16 (0.86,1.57) |
| Heart Failure                       | 569            | 1.10 (1.01,1.19)                 | 1,473        | 2.81 (2.67,2.95)                 | 2.56 (1.98,3.31) | 1,271                | 2.33 (2.21,2.46)                 | 2.13 (1.55,2.94) | 972                | 1.79 (1.68,1.90)                 | 1.63 (1.29,2.07) | 583                      | 1.28 (1.18,1.38)                 | 1.15 (0.84,1.57) |
| Atrial fibrillation                 | 460            | 0.89 (0.82,0.98)                 | 702          | 1.35 (1.25,1.45)                 | 1.50 (1.04,2.18) | 689                  | 1.27 (1.18,1.37)                 | 1.42 (0.96,2.11) | 682                | 1.26 (1.17,1.36)                 | 1.41 (1.08,1.84) | 449                      | 0.99 (0.90,1.09)                 | 1.11 (0.77,1.59) |
| Coronary Artery Disease             | 1,171          | 2.33 (2.20,2.47)                 | 1,719        | 3.35 (3.19,3.51)                 | 1.44 (1.12,1.84) | 1,729                | 3.26 (3.11,3.42)                 | 1.40 (1.07,1.84) | 1,212              | 2.29 (2.17,2.43)                 | 0.98 (0.81,1.19) | 1,114                    | 2.52 (2.38,2.67)                 | 1.08 (0.87,1.33) |
| Deep vein thrombosis                | 99             | 0.19 (0.16,0.23)                 | 112          | 0.21 (0.17,0.25)                 | 1.11 (0.47,2.64) | 229                  | 0.42 (0.36,0.47)                 | 2.19 (0.96,4.98) | 66                 | 0.12 (0.09,0.15)                 | 0.63 (0.28,1.43) | 138                      | 0.30 (0.25,0.35)                 | 1.58 (0.63,3.96) |
| Cardiovascular mortality            | 1,177          | 2.25 (2.13,2.38)                 | 1,985        | 3.72 (3.56,3.89)                 | 1.65 (1.33,2.05) | 1,285                | 2.33 (2.21,2.46)                 | 1.04 (0.77,1.39) | 748                | 1.36 (1.26,1.46)                 | 0.60 (0.47,0.78) | 371                      | 0.80 (0.73,0.89)                 | 0.36 (0.24,0.54) |
| Chronic pulmonary disease           | 280            | 0.54 (0.48,0.61)                 | 727          | 1.40 (1.30,1.51)                 | 2.58 (1.71,3.89) | 579                  | 1.08 (0.99,1.17)                 | 1.99 (1.19,3.33) | 391                | 0.73 (0.66,0.80)                 | 1.34 (0.94,1.90) | 339                      | 0.75 (0.68,0.84)                 | 1.37 (0.89,2.09) |
| Acute respiratory distress syndrome | 497            | 0.96 (0.87,1.04)                 | 932          | 1.76 (1.65,1.88)                 | 1.85 (1.31,2.62) | 801                  | 1.46 (1.36,1.56)                 | 1.54 (1.02,2.31) | 680                | 1.24 (1.15,1.34)                 | 1.31 (1.00,1.70) | 357                      | 0.78 (0.70,0.86)                 | 0.81 (0.56,1.17) |
| Seizure                             | 268            | 0.52 (0.46,0.58)                 | 787          | 1.50 (1.40,1.61)                 | 2.93 (1.96,4.39) | 764                  | 1.40 (1.30,1.50)                 | 2.75 (1.74,4.36) | 305                | 0.56 (0.50,0.62)                 | 1.09 (0.74,1.61) | 295                      | 0.64 (0.57,0.72)                 | 1.21 (0.60,2.44) |
| End-stage renal disease             | 68             | 0.13 (0.10,0.16)                 | 39           | 0.07 (0.05,0.10)                 | 0.57 (0.16,2.00) | 137                  | 0.25 (0.21,0.29)                 | 1.92 (0.64,5.78) | 38                 | 0.07 (0.05,0.09)                 | 0.53 (0.17,1.60) | 0                        | NA                               | NA               |
| Acute kidney injury                 | 236            | 0.45 (0.40,0.51)                 | 475          | 0.90 (0.82,0.98)                 | 1.99 (1.24,3.18) | 350                  | 0.64 (0.57,0.71)                 | 1.42 (0.83,2.44) | 335                | 0.61 (0.55,0.68)                 | 1.36 (0.91,2.03) | 103                      | 0.22 (0.18,0.27)                 | 0.49 (0.21,1.11) |
| Pancreatitis                        | 116            | 0.22 (0.18,0.26)                 | 167          | 0.31 (0.27,0.36)                 | 1.41 (0.65,3.09) | 40                   | 0.07 (0.05,0.10)                 | 0.33 (0.10,1.10) | 146                | 0.27 (0.23,0.31)                 | 1.20 (0.66,2.16) | 94                       | 0.20 (0.17,0.25)                 | 0.93 (0.44,1.93) |
| All-cause mortality                 | 7,161          | 13.69 (13.37,14.01)              | 16,508       | 30.92 (30.45,31.40)              | 2.26 (2.10,2.45) | 10,136               | 18.37 (18.02,18.73)              | 1.35 (1.21,1.50) | 6,664              | 12.10 (11.82,12.40)              | 0.89 (0.81,0.97) | 4,789                    | 10.40 (10.11,10.70)              | 0.75 (0.64,0.89) |

Note: CI: confidence interval, REF: Reference group; Major CVD: Major Cardiovascular Disease; Composite outcome of stroke, heart failure and coronary artery disease

Hazard Ratio (HR) and 95% Confidence Interval (95% CI) were estimated by Cox regression, HR >1 (or <1) indicates patients with COVID-19 had higher (lower) risk of sequelae compared to the non-COVID-19 control cohort

Un-vaccinated, Incomplete vaccinated, Fully Vaccinated and Received booster dose of COVID-19 vaccines refers to patients who have received 0 dose, 1 doses, 2 doses and ≥3 doses of BioNtech or CoronaVac COVID-19 vaccines, respectively

**Supplementary Table 3. Incidence rate and hazard ratio of clinical sequelae in COVID-19 and non-COVID-19 cohort after weighting during 0-30, 31-90, 91-180, 181-270, 271-365 days of SARS-CoV-2 infection (Patients with a positive laboratory confirmed polymerase chain reaction COVID-19 screening test result, continued)**

**181-270 days**

| Clinical sequelae                   | Controls (REF) |                                  |        | COVID-19                         |                  |       |                                  |                  |                    |                                  |                  |                          |                                  |                  |
|-------------------------------------|----------------|----------------------------------|--------|----------------------------------|------------------|-------|----------------------------------|------------------|--------------------|----------------------------------|------------------|--------------------------|----------------------------------|------------------|
|                                     | Event          | Incidence per 1,000 person-years | Event  | Unvaccinated                     |                  |       | Received single dose             |                  | Received two doses |                                  |                  | Received booster dose(s) |                                  |                  |
|                                     |                |                                  | Event  | Incidence per 1,000 person-years | Hazard ratio     | Event | Incidence per 1,000 person-years | Hazard ratio     | Event              | Incidence per 1,000 person-years | Hazard ratio     | Event                    | Incidence per 1,000 person-years | Hazard ratio     |
| Major CVD                           | 2,500          | 6.04 (5.80,6.28)                 | 3,807  | 9.34 (9.05,9.64)                 | 1.55 (1.31,1.83) | 3,599 | 8.54 (8.26,8.82)                 | 1.41 (1.18,1.70) | 2,555              | 6.05 (5.82,6.29)                 | 1.00 (0.89,1.13) | 2,039                    | 5.38 (5.15,5.62)                 | 0.89 (0.74,1.06) |
| Stroke                              | 1,383          | 3.20 (3.03,3.37)                 | 2,132  | 5.01 (4.80,5.22)                 | 1.57 (1.25,1.96) | 1,589 | 3.61 (3.43,3.79)                 | 1.13 (0.86,1.48) | 1,408              | 3.19 (3.03,3.36)                 | 1.00 (0.84,1.18) | 1,141                    | 2.88 (2.71,3.05)                 | 0.90 (0.71,1.14) |
| Myocardial infarction               | 612            | 1.37 (1.26,1.48)                 | 802    | 1.80 (1.68,1.93)                 | 1.31 (0.95,1.82) | 914   | 2.00 (1.87,2.13)                 | 1.46 (1.01,2.10) | 503                | 1.11 (1.01,1.21)                 | 0.81 (0.61,1.07) | 655                      | 1.60 (1.48,1.73)                 | 1.17 (0.64,2.14) |
| Heart Failure                       | 541            | 1.21 (1.11,1.32)                 | 1,547  | 3.49 (3.32,3.67)                 | 2.88 (2.25,3.68) | 1,262 | 2.77 (2.62,2.93)                 | 2.28 (1.70,3.07) | 562                | 1.24 (1.14,1.34)                 | 1.02 (0.77,1.36) | 306                      | 0.75 (0.67,0.84)                 | 0.62 (0.35,1.10) |
| Atrial fibrillation                 | 404            | 0.91 (0.83,1.00)                 | 726    | 1.65 (1.54,1.78)                 | 1.81 (1.27,2.59) | 397   | 0.88 (0.80,0.97)                 | 0.96 (0.59,1.58) | 600                | 1.33 (1.23,1.44)                 | 1.46 (1.11,1.93) | 291                      | 0.72 (0.64,0.80)                 | 0.78 (0.45,1.35) |
| Coronary Artery Disease             | 1,081          | 2.50 (2.36,2.65)                 | 1,268  | 2.93 (2.77,3.09)                 | 1.17 (0.90,1.52) | 1,618 | 3.65 (3.48,3.83)                 | 1.46 (1.12,1.91) | 1,163              | 2.64 (2.49,2.80)                 | 1.06 (0.88,1.27) | 911                      | 2.31 (2.16,2.46)                 | 0.92 (0.70,1.20) |
| Deep vein thrombosis                | 78             | 0.17 (0.14,0.21)                 | 63     | 0.14 (0.11,0.18)                 | 0.81 (0.31,2.14) | 70    | 0.15 (0.12,0.19)                 | 0.88 (0.33,2.38) | 95                 | 0.21 (0.17,0.25)                 | 1.20 (0.63,2.29) | 51                       | 0.12 (0.09,0.16)                 | 0.72 (0.26,2.02) |
| Cardiovascular mortality            | 738            | 1.64 (1.53,1.76)                 | 1,373  | 3.05 (2.90,3.22)                 | 1.86 (1.46,2.38) | 774   | 1.68 (1.56,1.80)                 | 1.03 (0.73,1.44) | 423                | 0.92 (0.84,1.02)                 | 0.56 (0.41,0.78) | 437                      | 1.06 (0.96,1.16)                 | 0.64 (0.36,1.13) |
| Chronic pulmonary disease           | 259            | 0.59 (0.52,0.66)                 | 708    | 1.62 (1.50,1.74)                 | 2.75 (1.86,4.07) | 527   | 1.17 (1.07,1.27)                 | 2.00 (1.25,3.20) | 263                | 0.59 (0.52,0.66)                 | 1.00 (0.68,1.47) | 169                      | 0.42 (0.36,0.49)                 | 0.72 (0.41,1.25) |
| Acute respiratory distress syndrome | 388            | 0.87 (0.78,0.96)                 | 590    | 1.32 (1.22,1.44)                 | 1.53 (1.00,2.33) | 339   | 0.74 (0.67,0.82)                 | 0.85 (0.49,1.48) | 357                | 0.78 (0.70,0.87)                 | 0.90 (0.65,1.26) | 471                      | 1.15 (1.05,1.26)                 | 1.34 (0.61,2.96) |
| Seizure                             | 241            | 0.54 (0.47,0.61)                 | 719    | 1.63 (1.51,1.75)                 | 3.03 (2.01,4.56) | 744   | 1.63 (1.52,1.75)                 | 3.04 (1.93,4.78) | 175                | 0.38 (0.33,0.44)                 | 0.71 (0.43,1.18) | 182                      | 0.44 (0.38,0.51)                 | 0.82 (0.21,3.23) |
| End-stage renal disease             | 36             | 0.08 (0.06,0.11)                 | 68     | 0.15 (0.12,0.19)                 | 1.89 (0.63,5.71) | 106   | 0.23 (0.19,0.28)                 | 2.87 (1.18,6.99) | 72                 | 0.16 (0.12,0.20)                 | 1.98 (0.89,4.39) | 0                        | NA                               | NA               |
| Acute kidney injury                 | 220            | 0.49 (0.43,0.56)                 | 338    | 0.76 (0.68,0.84)                 | 1.54 (0.96,2.46) | 263   | 0.57 (0.51,0.65)                 | 1.17 (0.64,2.14) | 204                | 0.45 (0.39,0.51)                 | 0.91 (0.56,1.47) | 103                      | 0.25 (0.20,0.30)                 | 0.51 (0.23,1.11) |
| Pancreatitis                        | 129            | 0.29 (0.24,0.34)                 | 243    | 0.54 (0.48,0.61)                 | 1.89 (0.98,3.64) | 161   | 0.35 (0.30,0.41)                 | 1.22 (0.47,3.21) | 102                | 0.22 (0.18,0.27)                 | 0.78 (0.43,1.41) | 44                       | 0.11 (0.08,0.14)                 | 0.37 (0.13,1.00) |
| All-cause mortality                 | 5,985          | 13.30 (12.97,13.64)              | 12,301 | 27.35 (26.87,27.84)              | 2.06 (1.89,2.24) | 6,660 | 14.44 (14.10,14.79)              | 1.09 (0.97,1.22) | 4,141              | 9.04 (8.76,9.31)                 | 0.68 (0.61,0.76) | 6,580                    | 15.95 (15.57,16.34)              | 1.19 (0.76,1.87) |

Note: CI: confidence interval, REF: Reference group; Major CVD: Major Cardiovascular Disease; Composite outcome of stroke, heart failure and coronary artery disease

Hazard Ratio (HR) and 95% Confidence Interval (95% CI) were estimated by Cox regression, HR >1 (or <1) indicates patients with COVID-19 had higher (lower) risk of sequelae compared to the non-COVID-19 control cohort

Un-vaccinated, Incomplete vaccinated, Fully Vaccinated and Received booster dose of COVID-19 vaccines refers to patients who have received 0 dose, 1 doses, 2 doses and ≥3 doses of BioNtech or CoronaVac COVID-19 vaccines, respectively

**Supplementary Table 3. Incidence rate and hazard ratio of clinical sequelae in COVID-19 and non-COVID-19 cohort after weighting during 0-30, 31-90, 91-180, 181-270, 271-365 days of SARS-CoV-2 infection (Patients with a positive laboratory confirmed polymerase chain reaction COVID-19 screening test result, continued)**

**271-365 days**

| Clinical sequelae                   | Controls (REF) |                                  | COVID-19     |                                  |                   |                      |                                  |                  |                    |                                  |                  |                          |                                  |                   |
|-------------------------------------|----------------|----------------------------------|--------------|----------------------------------|-------------------|----------------------|----------------------------------|------------------|--------------------|----------------------------------|------------------|--------------------------|----------------------------------|-------------------|
|                                     | Event          | Incidence per 1,000 person-years | Unvaccinated |                                  |                   | Received single dose |                                  |                  | Received two doses |                                  |                  | Received booster dose(s) |                                  |                   |
|                                     |                |                                  | Event        | Incidence per 1,000 person-years | Hazard ratio      | Event                | Incidence per 1,000 person-years | Hazard ratio     | Event              | Incidence per 1,000 person-years | Hazard ratio     | Event                    | Incidence per 1,000 person-years | Hazard ratio      |
| Major CVD                           | 1,532          | 6.12 (5.81,6.43)                 | 1,889        | 7.02 (6.71,7.34)                 | 1.24 (0.98,1.56)  | 1,659                | 7.00 (6.67,7.35)                 | 1.13 (0.87,1.46) | 1,445              | 5.87 (5.58,6.18)                 | 0.96 (0.81,1.12) | 1,105                    | 4.64 (4.37,4.92)                 | 0.74 (0.58,0.95)  |
| Stroke                              | 821            | 3.14 (2.93,3.36)                 | 917          | 3.28 (3.07,3.50)                 | 1.10 (0.79,1.53)  | 622                  | 2.52 (2.32,2.72)                 | 0.79 (0.51,1.22) | 762                | 2.98 (2.77,3.19)                 | 0.94 (0.76,1.18) | 563                      | 2.24 (2.06,2.43)                 | 0.70 (0.48,1.01)  |
| Myocardial infarction               | 382            | 1.42 (1.28,1.57)                 | 423          | 1.46 (1.32,1.60)                 | 1.12 (0.71,1.76)  | 435                  | 1.70 (1.55,1.87)                 | 1.18 (0.72,1.92) | 338                | 1.28 (1.15,1.43)                 | 0.90 (0.63,1.28) | 198                      | 0.76 (0.66,0.87)                 | 0.53 (0.32,0.88)  |
| Heart Failure                       | 430            | 1.60 (1.46,1.76)                 | 794          | 2.75 (2.57,2.95)                 | 1.88 (1.35,2.62)  | 697                  | 2.73 (2.54,2.94)                 | 1.68 (1.18,2.41) | 539                | 2.05 (1.88,2.23)                 | 1.27 (0.94,1.73) | 193                      | 0.75 (0.64,0.86)                 | 0.46 (0.24,0.86)  |
| Atrial fibrillation                 | 216            | 0.81 (0.70,0.92)                 | 417          | 1.45 (1.32,1.60)                 | 1.91 (1.18,3.09)  | 315                  | 1.24 (1.11,1.39)                 | 1.53 (0.82,2.84) | 261                | 1.00 (0.88,1.13)                 | 1.23 (0.82,1.83) | 265                      | 1.03 (0.91,1.16)                 | 1.26 (0.57,2.78)  |
| Coronary Artery Disease             | 628            | 2.41 (2.22,2.60)                 | 659          | 2.33 (2.16,2.51)                 | 1.03 (0.70,1.51)  | 732                  | 2.95 (2.74,3.17)                 | 1.22 (0.83,1.79) | 532                | 2.08 (1.91,2.26)                 | 0.86 (0.66,1.13) | 550                      | 2.21 (2.03,2.40)                 | 0.90 (0.58,1.41)  |
| Deep vein thrombosis                | 41             | 0.15 (0.11,0.21)                 | 68           | 0.23 (0.18,0.29)                 | 1.61 (0.51,5.05)  | 35                   | 0.14 (0.09,0.18)                 | 0.88 (0.21,3.67) | 30                 | 0.11 (0.08,0.16)                 | 0.74 (0.25,2.17) | 27                       | 0.10 (0.07,0.15)                 | 0.67 (0.16,2.81)  |
| Cardiovascular mortality            | 82             | 0.30 (0.24,0.38)                 | 184          | 0.63 (0.54,0.73)                 | 1.93 (0.89,4.19)  | 16                   | 0.06 (0.04,0.10)                 | 0.20 (0.03,1.46) | 8                  | 0.03 (0.01,0.05)                 | 0.10 (0.01,0.70) | 0                        | NA                               | NA                |
| Chronic pulmonary disease           | 224            | 0.84 (0.73,0.95)                 | 326          | 1.14 (1.02,1.27)                 | 1.49 (0.84,2.63)  | 430                  | 1.71 (1.55,1.87)                 | 2.01 (1.15,3.51) | 270                | 1.04 (0.92,1.16)                 | 1.23 (0.80,1.87) | 80                       | 0.31 (0.25,0.39)                 | 0.37 (0.17,0.79)  |
| Acute respiratory distress syndrome | 220            | 0.82 (0.71,0.93)                 | 320          | 1.10 (0.99,1.23)                 | 1.49 (0.82,2.68)  | 385                  | 1.50 (1.36,1.66)                 | 1.81 (1.10,2.96) | 251                | 0.95 (0.84,1.07)                 | 1.16 (0.75,1.79) | 490                      | 1.89 (1.73,2.07)                 | 2.26 (0.57,8.88)  |
| Seizure                             | 136            | 0.51 (0.43,0.60)                 | 226          | 0.78 (0.69,0.89)                 | 1.68 (0.87,3.26)  | 75                   | 0.29 (0.23,0.36)                 | 0.57 (0.18,1.86) | 128                | 0.49 (0.41,0.58)                 | 0.95 (0.58,1.57) | 123                      | 0.47 (0.39,0.56)                 | 0.92 (0.25,3.36)  |
| End-stage renal disease             | 41             | 0.15 (0.11,0.20)                 | 160          | 0.55 (0.47,0.64)                 | 4.09 (1.59,10.51) | 45                   | 0.17 (0.13,0.23)                 | 1.14 (0.26,5.11) | 4                  | 0.02 (0.01,0.04)                 | 0.11 (0.01,0.81) | 55                       | 0.21 (0.16,0.27)                 | 1.36 (0.18,10.44) |
| Acute kidney injury                 | 111            | 0.41 (0.34,0.49)                 | 109          | 0.37 (0.31,0.45)                 | 0.99 (0.42,2.36)  | 47                   | 0.18 (0.13,0.24)                 | 0.43 (0.10,1.87) | 74                 | 0.28 (0.22,0.35)                 | 0.67 (0.32,1.43) | 379                      | 1.45 (1.31,1.60)                 | 3.37 (0.59,19.24) |
| Pancreatitis                        | 65             | 0.24 (0.19,0.31)                 | 103          | 0.35 (0.29,0.43)                 | 1.62 (0.62,4.22)  | 78                   | 0.30 (0.24,0.37)                 | 1.23 (0.31,4.90) | 28                 | 0.11 (0.07,0.15)                 | 0.44 (0.15,1.27) | 19                       | 0.07 (0.04,0.11)                 | 0.29 (0.04,2.10)  |
| All-cause mortality                 | 3,502          | 12.92 (12.49,13.35)              | 7,446        | 25.46 (24.89,26.05)              | 2.13 (1.91,2.39)  | 3,285                | 12.76 (12.33,13.20)              | 0.97 (0.82,1.15) | 2,480              | 9.34 (8.98,9.71)                 | 0.72 (0.63,0.82) | 856                      | 3.27 (3.05,3.49)                 | 0.25 (0.15,0.41)  |

Note: CI: confidence interval, REF: Reference group; Major CVD: Major Cardiovascular Disease; Composite outcome of stroke, heart failure and coronary artery disease

Hazard Ratio (HR) and 95% Confidence Interval (95% CI) were estimated by Cox regression, HR >1 (or <1) indicates patients with COVID-19 had higher (lower) risk of sequelae compared to the non-COVID-19 control cohort

Un-vaccinated, Incomplete vaccinated, Fully Vaccinated and Received booster dose of COVID-19 vaccines refers to patients who have received 0 dose, 1 doses, 2 doses and ≥3 doses of BioNtech or CoronaVac COVID-19 vaccines, respectively

**Supplementary Table 4. Baseline characteristics of patients with COVID-19 from the Omicron wave in Hong Kong stratified by vaccine status and controls from the Hong Kong Hospital Authority before propensity-score weighting.**

| Baseline characteristics                                      | Hong Kong Hospital Authority<br>(April 1st, 2020 to October 31st, 2022) |                               |                                        |                                  |                                       | SMD <sup>b</sup> |
|---------------------------------------------------------------|-------------------------------------------------------------------------|-------------------------------|----------------------------------------|----------------------------------|---------------------------------------|------------------|
|                                                               | Controls<br>(N= 2,626,293)                                              | COVID-19                      |                                        |                                  | Received booster dose<br>(N= 491,549) |                  |
|                                                               |                                                                         | Un-vaccinated<br>(N= 114,677) | Incomplete vaccination<br>(N= 101,366) | Fully vaccinated<br>(N= 457,596) |                                       |                  |
|                                                               | N / Mean (% / SD)                                                       | N / Mean (% / SD)             | N / Mean (% / SD)                      | N / Mean (% / SD)                | N / Mean (% / SD)                     |                  |
| Age (years)                                                   | 54.6 (18.17)                                                            | 61.2 (21.98)                  | 59.6 (19.88)                           | 50.2 (17.70)                     | 52.1 (16.07)                          | 0.312            |
| Sex, male                                                     | 1,148,258 (43.7)                                                        | 50,527 (44.1)                 | 44,546 (43.9)                          | 201,769 (44.1)                   | 227,567 (46.3)                        | 0.021            |
| Charlson Comorbidity Index                                    | 1.68 (1.80)                                                             | 2.74 (2.56)                   | 2.38 (2.20)                            | 1.33 (1.69)                      | 1.35 (1.57)                           | 0.375            |
| <b>Pre-existing morbidities</b>                               |                                                                         |                               |                                        |                                  |                                       |                  |
| Respiratory disease                                           | 48,037 (1.8)                                                            | 5,811 (5.1)                   | 3,759 (3.7)                            | 8,283 (1.8)                      | 7,877 (1.6)                           | 0.101            |
| Diabetes                                                      | 302,972 (11.5)                                                          | 20,849 (18.2)                 | 18,406 (18.2)                          | 49,337 (10.8)                    | 48,954 (10.0)                         | 0.138            |
| Cardiovascular disease                                        | 197,529 (7.5)                                                           | 23,641 (20.6)                 | 14,776 (14.6)                          | 27,796 (6.1)                     | 27,318 (5.6)                          | 0.241            |
| Myocardial Infarction                                         | 17,864 (0.7)                                                            | 2,975 (2.6)                   | 1,443 (1.4)                            | 2,592 (0.6)                      | 2,256 (0.5)                           | 0.089            |
| Chronic heart failure                                         | 24,219 (0.9)                                                            | 5,778 (5.0)                   | 2,613 (2.6)                            | 3,518 (0.8)                      | 2,455 (0.5)                           | 0.145            |
| Peripheral vascular disease                                   | 6,853 (0.3)                                                             | 1,176 (1.0)                   | 574 (0.6)                              | 859 (0.2)                        | 749 (0.2)                             | 0.060            |
| Cerebrovascular disease                                       | 91,244 (3.5)                                                            | 12,733 (11.1)                 | 7,461 (7.4)                            | 12,617 (2.8)                     | 10,975 (2.2)                          | 0.190            |
| COPD                                                          | 47,867 (1.8)                                                            | 5,769 (5.0)                   | 3,742 (3.7)                            | 8,263 (1.8)                      | 7,868 (1.6)                           | 0.101            |
| Dementia                                                      | 7,006 (0.3)                                                             | 2,773 (2.4)                   | 1,359 (1.3)                            | 1,308 (0.3)                      | 581 (0.1)                             | 0.112            |
| Paralysis                                                     | 5,321 (0.2)                                                             | 1,099 (1.0)                   | 485 (0.5)                              | 720 (0.2)                        | 499 (0.1)                             | 0.061            |
| Diabetes without chronic complication                         | 289,744 (11.0)                                                          | 19,231 (16.8)                 | 17,417 (17.2)                          | 47,368 (10.4)                    | 47,199 (9.6)                          | 0.127            |
| Diabetes with chronic complication                            | 19,264 (0.7)                                                            | 2,467 (2.2)                   | 1,476 (1.5)                            | 2,973 (0.6)                      | 2,562 (0.5)                           | 0.074            |
| Chronic Kidney Disease                                        | 29,397 (1.1)                                                            | 4,885 (4.3)                   | 2,740 (2.7)                            | 4,304 (0.9)                      | 3,862 (0.8)                           | 0.118            |
| Mild liver disease                                            | 3,631 (0.1)                                                             | 511 (0.4)                     | 255 (0.3)                              | 608 (0.1)                        | 493 (0.1)                             | 0.033            |
| Moderate-severe liver disease                                 | 2,399 (0.1)                                                             | 384 (0.3)                     | 168 (0.2)                              | 436 (0.1)                        | 315 (0.1)                             | 0.029            |
| Ulcers                                                        | 25,657 (1.0)                                                            | 2,695 (2.4)                   | 1,722 (1.7)                            | 4,179 (0.9)                      | 3,949 (0.8)                           | 0.064            |
| Rheumatoid arthritis and other inflammatory polyarthropathies | 10,593 (0.4)                                                            | 895 (0.8)                     | 626 (0.6)                              | 1,815 (0.4)                      | 1,858 (0.4)                           | 0.028            |
| Acquired Immune Deficiency Syndrome (AIDS)                    | 6 (0.0)                                                                 | 0 (0.0)                       | 0 (0.0)                                | 0 (0.0)                          | 0 (0.0)                               | 0.001            |

|                                            |                  |                 |                 |                 |                 |       |
|--------------------------------------------|------------------|-----------------|-----------------|-----------------|-----------------|-------|
| Malignancy                                 | 74,608 (2.8)     | 7,033 (6.1)     | 4,994 (4.9)     | 11,612 (2.5)    | 11,003 (2.2)    | 0.104 |
| Metastatic solid tumour                    | 11,601 (0.4)     | 1,677 (1.5)     | 937 (0.9)       | 1,771 (0.4)     | 1,324 (0.3)     | 0.066 |
| <b>Medication history</b>                  |                  |                 |                 |                 |                 |       |
| Renin-angiotensin-system agents            | 48,037 (1.8)     | 5,811 (5.1)     | 3,759 (3.7)     | 8,283 (1.8)     | 7,877 (1.6)     | 0.101 |
| Beta blockers                              | 302,972 (11.5)   | 20,849 (18.2)   | 18,406 (18.2)   | 49,337 (10.8)   | 48,954 (10.0)   | 0.138 |
| Calcium channel blockers                   | 197,529 (7.5)    | 23,641 (20.6)   | 14,776 (14.6)   | 27,796 (6.1)    | 27,318 (5.6)    | 0.241 |
| Diuretics                                  | 367,754 (14.0)   | 26,237 (22.9)   | 22,748 (22.4)   | 59,411 (13.0)   | 61,874 (12.6)   | 0.159 |
| Nitrates                                   | 232,012 (8.8)    | 19,478 (17.0)   | 15,683 (15.5)   | 37,186 (8.1)    | 35,296 (7.2)    | 0.168 |
| Lipid lowering agents                      | 519,967 (19.8)   | 34,747 (30.3)   | 31,214 (30.8)   | 84,324 (18.4)   | 86,862 (17.7)   | 0.180 |
| Insulins                                   | 76,051 (2.9)     | 11,512 (10.0)   | 6,563 (6.5)     | 11,773 (2.6)    | 10,650 (2.2)    | 0.173 |
| Antidiabetic drugs                         | 55,622 (2.1)     | 7,300 (6.4)     | 4,482 (4.4)     | 8,262 (1.8)     | 8,424 (1.7)     | 0.127 |
| Oral anticoagulants                        | 534,461 (20.4)   | 34,337 (29.9)   | 30,985 (30.6)   | 82,672 (18.1)   | 92,071 (18.7)   | 0.170 |
| Antiplatelets                              | 42,736 (1.6)     | 5,710 (5.0)     | 3,434 (3.4)     | 7,038 (1.5)     | 5,991 (1.2)     | 0.113 |
| Immunosuppressants                         | 279,426 (10.6)   | 18,780 (16.4)   | 17,637 (17.4)   | 47,595 (10.4)   | 47,592 (9.7)    | 0.126 |
| <b>Number of past healthcare visits</b>    |                  |                 |                 |                 |                 |       |
| Hospital admission                         | 0.3 (1.95)       | 1.3 (5.50)      | 0.8 (4.61)      | 0.3 (2.47)      | 0.3 (2.30)      | 0.130 |
| Doctor consultation                        | 2.7 (3.72)       | 4.0 (4.91)      | 4.0 (4.63)      | 2.9 (3.97)      | 2.7 (3.64)      | 0.193 |
| <b>Doses of COVID-19 vaccines received</b> |                  |                 |                 |                 |                 |       |
| 0                                          | 419,380 (16.0)   | 114,677 (100.0) | 0 (0.0)         | 0 (0.0)         | 0 (0.0)         |       |
| 1                                          | 198,031 (7.5)    | 0 (0.0)         | 101,366 (100.0) | 0 (0.0)         | 0 (0.0)         |       |
| 2                                          | 914,115 (34.8)   | 0 (0.0)         | 0 (0.0)         | 457,596 (100.0) | 0 (0.0)         |       |
| 3 or above                                 | 1,094,767 (41.7) | 0 (0.0)         | 0 (0.0)         | 0 (0.0)         | 491,549 (100.0) |       |

**Supplementary Table 5. Incidence rate and hazard ratio of clinical sequelae in COVID-19 and non-COVID-19 cohort after weighting during 0-30, 31-90, 91-180, 181-270,271-365 days of SARS-CoV-2 infection (Cases of SARS-COV-2 infection from the Omicron wave in Hong Kong)**

**0-30 days**

| Clinical sequelae                   | Controls (REF) |                                  | COVID-19     |                                  |                     |                      |                                  |                       |                    |                                  |                  |                          |                                  |                  |
|-------------------------------------|----------------|----------------------------------|--------------|----------------------------------|---------------------|----------------------|----------------------------------|-----------------------|--------------------|----------------------------------|------------------|--------------------------|----------------------------------|------------------|
|                                     | Event          | Incidence per 1,000 person-years | Unvaccinated |                                  |                     | Received single dose |                                  |                       | Received two doses |                                  |                  | Received booster dose(s) |                                  |                  |
|                                     |                |                                  | Event        | Incidence per 1,000 person-years | Hazard ratio        | Event                | Incidence per 1,000 person-years | Hazard ratio          | Event              | Incidence per 1,000 person-years | Hazard ratio     | Event                    | Incidence per 1,000 person-years | Hazard ratio     |
| Major CVD                           | 1,297          | 4.36 (4.13,4.60)                 | 5,913        | 20.49 (19.97,21.01)              | 4.67 (4.02,5.44)    | 4,012                | 13.72 (13.31,14.16)              | 3.14 (2.61,3.78)      | 3,278              | 11.08 (10.70,11.46)              | 2.54 (2.22,2.90) | 2,595                    | 8.69 (8.36,9.03)                 | 1.99 (1.73,2.30) |
| Stroke                              | 812            | 2.62 (2.44,2.80)                 | 3,522        | 11.74 (11.35,12.13)              | 4.45 (3.66,5.42)    | 2,422                | 7.96 (7.65,8.28)                 | 3.03 (2.40,3.83)      | 2,272              | 7.37 (7.07,7.68)                 | 2.81 (2.39,3.31) | 1,690                    | 5.42 (5.16,5.68)                 | 2.07 (1.71,2.51) |
| Myocardial infarction               | 297            | 0.93 (0.83,1.04)                 | 1,924        | 6.15 (5.88,6.43)                 | 6.58 (5.10,8.49)    | 1,550                | 4.92 (4.68,5.17)                 | 5.28 (3.88,7.18)      | 974                | 3.06 (2.88,3.26)                 | 3.30 (2.54,4.28) | 919                      | 2.86 (2.68,3.05)                 | 3.08 (2.39,3.97) |
| Heart Failure                       | 267            | 0.84 (0.74,0.94)                 | 1,368        | 4.40 (4.17,4.64)                 | 5.24 (3.89,7.05)    | 907                  | 2.89 (2.71,3.08)                 | 3.45 (2.38,4.98)      | 639                | 2.02 (1.86,2.18)                 | 2.41 (1.76,3.28) | 352                      | 1.10 (0.99,1.22)                 | 1.31 (0.89,1.94) |
| Atrial fibrillation                 | 153            | 0.48 (0.41,0.57)                 | 684          | 2.21 (2.05,2.38)                 | 4.57 (3.03,6.90)    | 594                  | 1.91 (1.76,2.06)                 | 3.94 (2.52,6.17)      | 423                | 1.34 (1.22,1.48)                 | 2.78 (1.89,4.08) | 506                      | 1.59 (1.45,1.73)                 | 3.29 (2.34,4.61) |
| Coronary Artery Disease             | 478            | 1.54 (1.41,1.68)                 | 2,144        | 7.04 (6.74,7.34)                 | 4.54 (3.57,5.77)    | 1,658                | 5.42 (5.16,5.68)                 | 3.50 (2.64,4.66)      | 1,259              | 4.08 (3.86,4.31)                 | 2.64 (2.12,3.29) | 1,092                    | 3.52 (3.31,3.73)                 | 2.28 (1.83,2.84) |
| Deep vein thrombosis                | 40             | 0.12 (0.09,0.17)                 | 307          | 0.97 (0.87,1.09)                 | 7.85 (3.82,16.15)   | 271                  | 0.86 (0.76,0.96)                 | 6.91 (3.24,14.73)     | 110                | 0.34 (0.28,0.41)                 | 2.77 (1.28,5.98) | 71                       | 0.22 (0.17,0.28)                 | 1.78 (0.78,4.05) |
| Cardiovascular mortality            | 1,082          | 3.36 (3.16,3.56)                 | 6,269        | 19.88 (19.39,20.38)              | 5.89 (5.13,6.76)    | 3,419                | 10.77 (10.41,11.13)              | 3.20 (2.66,3.85)      | 2,106              | 6.57 (6.30,6.86)                 | 1.96 (1.64,2.33) | 1,054                    | 3.25 (3.06,3.45)                 | 0.97 (0.74,1.26) |
| Chronic pulmonary disease           | 115            | 0.36 (0.30,0.43)                 | 372          | 1.21 (1.09,1.34)                 | 3.32 (1.93,5.70)    | 682                  | 2.20 (2.04,2.37)                 | 6.05 (3.62,10.12)     | 397                | 1.26 (1.14,1.39)                 | 3.48 (2.32,5.24) | 232                      | 0.73 (0.64,0.83)                 | 2.01 (1.29,3.14) |
| Acute respiratory distress syndrome | 189            | 0.59 (0.51,0.68)                 | 1,108        | 3.54 (3.34,3.75)                 | 5.97 (4.17,8.56)    | 710                  | 2.25 (2.09,2.42)                 | 5.78 (2.51,5.76)      | 446                | 1.40 (1.27,1.53)                 | 2.37 (1.65,3.41) | 428                      | 1.33 (1.21,1.46)                 | 2.25 (1.58,3.21) |
| Seizure                             | 100            | 0.31 (0.25,0.38)                 | 789          | 2.54 (2.37,2.73)                 | 8.11 (5.10,12.91)   | 568                  | 1.81 (1.66,1.96)                 | 7.06 (3.25,10.27)     | 232                | 0.73 (0.64,0.82)                 | 2.33 (1.45,3.73) | 298                      | 0.92 (0.82,1.03)                 | 2.96 (1.55,5.67) |
| End-stage renal disease             | 35             | 0.11 (0.08,0.15)                 | 240          | 0.76 (0.67,0.86)                 | 7.06 (3.00,16.62)   | 55                   | 0.17 (0.13,0.22)                 | 9.50 (1.61,0.39,6.64) | 93                 | 0.29 (0.24,0.36)                 | 2.72 (1.06,6.95) | 86                       | 0.27 (0.22,0.33)                 | 2.49 (0.66,9.38) |
| Acute kidney injury                 | 87             | 0.27 (0.22,0.33)                 | 824          | 2.63 (2.46,2.82)                 | 9.70 (6.42,14.65)   | 813                  | 2.57 (2.40,2.76)                 | 9.50 (5.98,15.08)     | 312                | 0.98 (0.88,1.09)                 | 3.62 (2.24,5.85) | 385                      | 1.19 (1.08,1.32)                 | 4.41 (2.76,7.05) |
| Pancreatitis                        | 56             | 0.18 (0.13,0.23)                 | 241          | 0.76 (0.67,0.87)                 | 4.34 (2.08,9.09)    | 136                  | 0.43 (0.36,0.51)                 | 9.50 (2.45,0.80,7.55) | 145                | 0.45 (0.39,0.53)                 | 2.59 (1.37,4.87) | 132                      | 0.41 (0.34,0.48)                 | 2.33 (1.29,4.18) |
| All-cause mortality                 | 5,338          | 16.57 (16.13,17.02)              | 99,525       | 315.57 (313.62,317.54)           | 18.97 (18.14,19.84) | 47,276               | 148.90 (147.56,150.25)           | 8.97 (8.47,9.50)      | 21,029             | 65.63 (64.75,66.52)              | 3.96 (3.72,4.21) | 9,377                    | 28.93 (28.35,29.52)              | 1.75 (1.51,2.02) |

Note: CI: confidence interval, REF: Reference group; Major CVD: Major Cardiovascular Disease; Composite outcome of stroke, heart failure and coronary artery disease

Hazard Ratio (HR) and 95% Confidence Interval (95% CI) were estimated by Cox regression, HR >1 (or <1) indicates patients with COVID-19 had higher (lower) risk of sequelae compared to the non-COVID-19 control cohort

Un-vaccinated, Incomplete vaccinated, Fully Vaccinated and Received booster dose of COVID-19 vaccines refers to patients who have received 0 dose, 1 doses, 2 doses and ≥3 doses of BioNtech or CoronaVac COVID-19 vaccines, respectively

**Supplementary Table 5. Incidence rate and hazard ratio of clinical sequelae in COVID-19 and non-COVID-19 cohort after weighting during 0-30, 31-90, 91-180, 181-270,271-365 days of SARS-CoV-2 infection (Cases of SARS-COV-2 infection from the Omicron wave in Hong Kong, continued)**

| 31-90 days                          |       |                                  | COVID-19     |                                  |                  |                      |                                  |                  |                    |                                  |                  |                          |                                  |                  |
|-------------------------------------|-------|----------------------------------|--------------|----------------------------------|------------------|----------------------|----------------------------------|------------------|--------------------|----------------------------------|------------------|--------------------------|----------------------------------|------------------|
| Controls (REF)                      |       |                                  | Unvaccinated |                                  |                  | Received single dose |                                  |                  | Received two doses |                                  |                  | Received booster dose(s) |                                  |                  |
| Clinical sequelae                   | Event | Incidence per 1,000 person-years | Event        | Incidence per 1,000 person-years | Hazard ratio     | Event                | Incidence per 1,000 person-years | Hazard ratio     | Event              | Incidence per 1,000 person-years | Hazard ratio     | Event                    | Incidence per 1,000 person-years | Hazard ratio     |
| Major CVD                           | 3,085 | 5.29 (5.10,5.48)                 | 5,763        | 10.24 (9.97,10.50)               | 1.94 (1.67,2.24) | 4,369                | 7.62 (7.39,7.85)                 | 1.44 (1.21,1.71) | 3,273              | 5.64 (5.45,5.83)                 | 1.07 (0.94,1.20) | 3,429                    | 5.88 (5.68,6.08)                 | 1.11 (0.99,1.25) |
| Stroke                              | 1,754 | 2.89 (2.75,3.02)                 | 2,851        | 4.87 (4.69,5.05)                 | 1.69 (1.37,2.07) | 2,385                | 4.00 (3.84,4.16)                 | 1.38 (1.10,1.75) | 1,748              | 2.89 (2.76,3.03)                 | 1.00 (0.85,1.18) | 1,584                    | 2.60 (2.47,2.73)                 | 0.90 (0.75,1.08) |
| Myocardial infarction               | 682   | 1.09 (1.01,1.17)                 | 1,208        | 1.97 (1.86,2.09)                 | 1.81 (1.35,2.43) | 679                  | 1.10 (1.02,1.18)                 | 1.01 (0.65,1.56) | 711                | 1.14 (1.06,1.23)                 | 1.05 (0.81,1.36) | 696                      | 1.11 (1.03,1.19)                 | 1.02 (0.78,1.32) |
| Heart Failure                       | 718   | 1.15 (1.07,1.24)                 | 2,294        | 3.77 (3.62,3.93)                 | 3.28 (2.65,4.06) | 1,216                | 1.98 (1.87,2.09)                 | 1.72 (1.29,2.29) | 1,022              | 1.65 (1.55,1.75)                 | 1.43 (1.13,1.81) | 978                      | 1.56 (1.47,1.66)                 | 1.36 (1.05,1.76) |
| Atrial fibrillation                 | 473   | 0.76 (0.70,0.83)                 | 1,108        | 1.83 (1.73,1.94)                 | 2.41 (1.76,3.28) | 701                  | 1.15 (1.06,1.23)                 | 1.51 (1.01,2.25) | 629                | 1.02 (0.94,1.10)                 | 1.34 (1.01,1.78) | 504                      | 0.81 (0.74,0.88)                 | 1.06 (0.78,1.45) |
| Coronary Artery Disease             | 1,208 | 1.99 (1.88,2.10)                 | 2,296        | 3.86 (3.70,4.02)                 | 1.94 (1.55,2.42) | 1,523                | 2.54 (2.41,2.66)                 | 1.27 (0.95,1.71) | 1,334              | 2.21 (2.09,2.33)                 | 1.11 (0.92,1.34) | 1,594                    | 2.63 (2.50,2.76)                 | 1.32 (1.12,1.56) |
| Deep vein thrombosis                | 117   | 0.19 (0.15,0.22)                 | 451          | 0.73 (0.67,0.80)                 | 3.95 (2.30,6.81) | 220                  | 0.35 (0.31,0.40)                 | 1.91 (0.97,3.75) | 236                | 0.38 (0.33,0.43)                 | 2.04 (1.25,3.31) | 105                      | 0.17 (0.14,0.20)                 | 0.90 (0.48,1.69) |
| Cardiovascular mortality            | 1,312 | 2.08 (1.97,2.20)                 | 2,591        | 4.20 (4.04,4.37)                 | 2.02 (1.66,2.45) | 1,561                | 2.51 (2.38,2.63)                 | 1.20 (0.94,1.55) | 1,247              | 1.99 (1.88,2.10)                 | 0.96 (0.77,1.18) | 691                      | 1.09 (1.01,1.18)                 | 0.52 (0.38,0.72) |
| Chronic pulmonary disease           | 307   | 0.50 (0.44,0.55)                 | 911          | 1.51 (1.42,1.61)                 | 3.05 (2.08,4.48) | 628                  | 1.03 (0.95,1.12)                 | 2.08 (1.26,3.44) | 383                | 0.62 (0.56,0.69)                 | 1.26 (0.88,1.80) | 274                      | 0.44 (0.39,0.50)                 | 0.89 (0.60,1.33) |
| Acute respiratory distress syndrome | 534   | 0.85 (0.78,0.92)                 | 892          | 1.46 (1.36,1.56)                 | 1.71 (1.18,2.48) | 886                  | 1.43 (1.34,1.53)                 | 1.68 (1.14,2.48) | 622                | 1.00 (0.92,1.08)                 | 1.17 (0.88,1.56) | 710                      | 1.13 (1.05,1.22)                 | 1.33 (0.97,1.82) |
| Seizure                             | 286   | 0.46 (0.40,0.51)                 | 747          | 1.23 (1.14,1.32)                 | 2.70 (1.73,4.21) | 533                  | 0.86 (0.79,0.94)                 | 1.90 (1.09,3.29) | 349                | 0.56 (0.50,0.62)                 | 1.22 (0.84,1.78) | 196                      | 0.31 (0.27,0.36)                 | 0.68 (0.40,1.16) |
| End-stage renal disease             | 62    | 0.10 (0.08,0.13)                 | 109          | 0.18 (0.15,0.21)                 | 1.79 (0.59,5.43) | 138                  | 0.22 (0.19,0.26)                 | 2.25 (0.86,5.90) | 63                 | 0.10 (0.08,0.13)                 | 1.01 (0.42,2.45) | 21                       | 0.03 (0.02,0.05)                 | 0.34 (0.10,1.09) |
| Acute kidney injury                 | 202   | 0.32 (0.28,0.37)                 | 762          | 1.24 (1.16,1.33)                 | 3.86 (2.60,5.71) | 509                  | 0.82 (0.75,0.90)                 | 2.55 (1.54,4.22) | 251                | 0.40 (0.35,0.45)                 | 1.24 (0.77,2.00) | 258                      | 0.41 (0.36,0.46)                 | 1.27 (0.76,2.10) |
| Pancreatitis                        | 145   | 0.23 (0.19,0.27)                 | 483          | 0.78 (0.72,0.86)                 | 3.42 (1.92,6.10) | 263                  | 0.42 (0.37,0.48)                 | 1.85 (0.90,3.80) | 153                | 0.24 (0.21,0.29)                 | 1.07 (0.60,1.91) | 175                      | 0.28 (0.24,0.32)                 | 1.21 (0.74,1.96) |
| All-cause mortality                 | 7,641 | 12.11 (11.85,12.39)              | 28,350       | 45.96 (45.43,46.50)              | 3.79 (3.56,4.04) | 13,384               | 21.49 (21.13,21.85)              | 1.77 (1.62,1.94) | 8,501              | 13.55 (13.26,13.84)              | 1.12 (1.03,1.22) | 6,713                    | 10.62 (10.36,10.87)              | 0.88 (0.77,1.00) |

Note: CI: confidence interval, REF: Reference group; Major CVD: Major Cardiovascular Disease; Composite outcome of stroke, heart failure and coronary artery disease

Hazard Ratio (HR) and 95% Confidence Interval (95% CI) were estimated by Cox regression, HR >1 (or <1) indicates patients with COVID-19 had higher (lower) risk of sequelae compared to the non-COVID-19 control cohort

Un-vaccinated, Incomplete vaccinated, Fully Vaccinated and Received booster dose of COVID-19 vaccines refers to patients who have received 0 dose, 1 doses, 2 doses and ≥3 doses of BioNtech or CoronaVac COVID-19 vaccines, respectively

**Supplementary Table 5. Incidence rate and hazard ratio of clinical sequelae in COVID-19 and non-COVID-19 cohort after weighting during 0-30, 31-90, 91-180, 181-270,271-365 days of SARS-CoV-2 infection (Cases of SARS-COV-2 infection from the Omicron wave in Hong Kong, continued)**

| 91-180 days                         |       |                                  | COVID-19     |                                  |                  |                      |                                  |                  |                    |                                  |                  |                          |                                  |                  |
|-------------------------------------|-------|----------------------------------|--------------|----------------------------------|------------------|----------------------|----------------------------------|------------------|--------------------|----------------------------------|------------------|--------------------------|----------------------------------|------------------|
| Controls (REF)                      |       |                                  | Unvaccinated |                                  |                  | Received single dose |                                  |                  | Received two doses |                                  |                  | Received booster dose(s) |                                  |                  |
| Clinical sequelae                   | Event | Incidence per 1,000 person-years | Event        | Incidence per 1,000 person-years | Hazard ratio     | Event                | Incidence per 1,000 person-years | Hazard ratio     | Event              | Incidence per 1,000 person-years | Hazard ratio     | Event                    | Incidence per 1,000 person-years | Hazard ratio     |
| Major CVD                           | 4,194 | 5.58 (5.41,5.75)                 | 6,652        | 8.57 (8.37,8.78)                 | 1.54 (1.33,1.78) | 5,781                | 6.93 (6.75,7.11)                 | 1.25 (1.07,1.46) | 4,679              | 5.64 (5.48,5.81)                 | 1.02 (0.92,1.12) | 3,201                    | 5.01 (4.84,5.19)                 | 0.89 (0.80,0.99) |
| Stroke                              | 2,433 | 3.10 (2.98,3.23)                 | 3,365        | 4.16 (4.02,4.30)                 | 1.34 (1.10,1.64) | 3,176                | 3.65 (3.53,3.78)                 | 1.18 (0.96,1.46) | 2,621              | 3.04 (2.92,3.15)                 | 0.98 (0.86,1.13) | 1,551                    | 2.33 (2.22,2.45)                 | 0.74 (0.64,0.87) |
| Myocardial infarction               | 905   | 1.12 (1.05,1.20)                 | 1,477        | 1.75 (1.66,1.84)                 | 1.56 (1.16,2.09) | 1,148                | 1.27 (1.20,1.35)                 | 1.14 (0.82,1.58) | 932                | 1.05 (0.98,1.12)                 | 0.93 (0.74,1.17) | 893                      | 1.31 (1.22,1.39)                 | 1.17 (0.93,1.47) |
| Heart Failure                       | 825   | 1.03 (0.96,1.10)                 | 2,153        | 2.56 (2.45,2.67)                 | 2.51 (2.00,3.15) | 1,507                | 1.68 (1.60,1.77)                 | 1.65 (1.24,2.20) | 1,292              | 1.46 (1.38,1.54)                 | 1.43 (1.17,1.76) | 713                      | 1.05 (0.97,1.12)                 | 1.01 (0.77,1.31) |
| Atrial fibrillation                 | 670   | 0.84 (0.78,0.90)                 | 1,047        | 1.25 (1.18,1.33)                 | 1.50 (1.08,2.07) | 1,065                | 1.20 (1.12,1.27)                 | 1.43 (1.03,1.97) | 950                | 1.08 (1.01,1.15)                 | 1.29 (1.03,1.61) | 793                      | 1.17 (1.09,1.25)                 | 1.40 (0.96,2.04) |
| Coronary Artery Disease             | 1,686 | 2.15 (2.05,2.26)                 | 2,718        | 3.30 (3.18,3.43)                 | 1.53 (1.23,1.91) | 2,387                | 2.73 (2.62,2.84)                 | 1.27 (1.01,1.59) | 1,844              | 2.14 (2.04,2.24)                 | 0.99 (0.85,1.16) | 1,503                    | 2.27 (2.16,2.39)                 | 1.05 (0.89,1.25) |
| Deep vein thrombosis                | 148   | 0.18 (0.16,0.21)                 | 269          | 0.32 (0.28,0.36)                 | 1.73 (0.91,3.30) | 341                  | 0.38 (0.34,0.42)                 | 2.06 (1.05,4.03) | 98                 | 0.11 (0.09,0.13)                 | 0.60 (0.31,1.17) | 135                      | 0.20 (0.16,0.23)                 | 1.08 (0.47,2.50) |
| Cardiovascular mortality            | 1,538 | 1.89 (1.80,1.99)                 | 2,956        | 3.46 (3.34,3.59)                 | 1.83 (1.51,2.21) | 1,663                | 1.83 (1.75,1.92)                 | 0.97 (0.75,1.25) | 1,207              | 1.35 (1.27,1.43)                 | 0.71 (0.58,0.88) | 396                      | 0.58 (0.52,0.64)                 | 0.31 (0.21,0.45) |
| Chronic pulmonary disease           | 426   | 0.53 (0.49,0.59)                 | 963          | 1.16 (1.09,1.23)                 | 2.18 (1.49,3.21) | 857                  | 0.97 (0.90,1.03)                 | 1.83 (1.19,2.82) | 555                | 0.63 (0.58,0.69)                 | 1.19 (0.89,1.60) | 422                      | 0.63 (0.57,0.69)                 | 1.15 (0.79,1.69) |
| Acute respiratory distress syndrome | 707   | 0.87 (0.81,0.94)                 | 1,412        | 1.67 (1.58,1.76)                 | 1.91 (1.41,2.59) | 1,010                | 1.12 (1.05,1.19)                 | 1.28 (0.89,1.84) | 1,016              | 1.14 (1.07,1.21)                 | 1.30 (1.04,1.63) | 593                      | 0.87 (0.80,0.94)                 | 0.99 (0.70,1.41) |
| Seizure                             | 386   | 0.48 (0.43,0.53)                 | 1,063        | 1.27 (1.19,1.34)                 | 2.67 (1.85,3.86) | 929                  | 1.03 (0.97,1.10)                 | 2.20 (1.45,3.33) | 409                | 0.46 (0.42,0.50)                 | 0.97 (0.70,1.36) | 299                      | 0.44 (0.39,0.49)                 | 0.89 (0.48,1.68) |
| End-stage renal disease             | 76    | 0.09 (0.07,0.12)                 | 141          | 0.17 (0.14,0.19)                 | 1.79 (0.62,5.15) | 181                  | 0.20 (0.17,0.23)                 | 2.18 (0.83,5.67) | 39                 | 0.04 (0.03,0.06)                 | 0.47 (0.16,1.36) | 0                        | NA                               | NA               |
| Acute kidney injury                 | 354   | 0.44 (0.39,0.48)                 | 659          | 0.78 (0.72,0.84)                 | 1.79 (1.18,2.70) | 495                  | 0.55 (0.50,0.60)                 | 1.26 (0.81,1.98) | 439                | 0.49 (0.45,0.54)                 | 1.13 (0.80,1.61) | 144                      | 0.21 (0.18,0.25)                 | 0.47 (0.26,0.87) |
| Pancreatitis                        | 179   | 0.22 (0.19,0.26)                 | 166          | 0.20 (0.17,0.23)                 | 0.89 (0.42,1.89) | 184                  | 0.20 (0.18,0.23)                 | 0.93 (0.38,2.29) | 193                | 0.22 (0.19,0.25)                 | 0.98 (0.59,1.64) | 103                      | 0.15 (0.12,0.18)                 | 0.68 (0.36,1.28) |
| All-cause mortality                 | 9,882 | 12.15 (11.91,12.39)              | 22,827       | 26.74 (26.40,27.09)              | 2.20 (2.05,2.36) | 12,939               | 14.26 (14.02,14.51)              | 1.18 (1.07,1.29) | 8,715              | 9.73 (9.53,9.94)                 | 0.80 (0.74,0.87) | 5,528                    | 8.03 (7.83,8.25)                 | 0.66 (0.58,0.76) |

Note: CI: confidence interval, REF: Reference group; Major CVD: Major Cardiovascular Disease; Composite outcome of stroke, heart failure and coronary artery disease

Hazard Ratio (HR) and 95% Confidence Interval (95% CI) were estimated by Cox regression, HR >1 (or <1) indicates patients with COVID-19 had higher (lower) risk of sequelae compared to the non-COVID-19 control cohort

Un-vaccinated, Incomplete vaccinated, Fully Vaccinated and Received booster dose of COVID-19 vaccines refers to patients who have received 0 dose, 1 doses, 2 doses and ≥3 doses of BioNtech or CoronaVac COVID-19 vaccines, respectively



**Supplementary Table 5. Incidence rate and hazard ratio of clinical sequelae in COVID-19 and non-COVID-19 cohort after weighting during 0-30, 31-90, 91-180, 181-270,271-365 days of SARS-CoV-2 infection (Cases of SARS-COV-2 infection from the Omicron wave in Hong Kong, continued)**

| 181-270 days                        |       |                                  | COVID-19     |                                  |                  |                      |                                  |                  |                    |                                  |                  |                          |                                  |                  |
|-------------------------------------|-------|----------------------------------|--------------|----------------------------------|------------------|----------------------|----------------------------------|------------------|--------------------|----------------------------------|------------------|--------------------------|----------------------------------|------------------|
| Controls (REF)                      |       |                                  | Unvaccinated |                                  |                  | Received single dose |                                  |                  | Received two doses |                                  |                  | Received booster dose(s) |                                  |                  |
| Clinical sequelae                   | Event | Incidence per 1,000 person-years | Event        | Incidence per 1,000 person-years | Hazard ratio     | Event                | Incidence per 1,000 person-years | Hazard ratio     | Event              | Incidence per 1,000 person-years | Hazard ratio     | Event                    | Incidence per 1,000 person-years | Hazard ratio     |
| Major CVD                           | 3,415 | 5.79 (5.60,5.98)                 | 5,038        | 8.58 (8.34,8.82)                 | 1.48 (1.27,1.72) | 4,679                | 7.56 (7.35,7.78)                 | 1.31 (1.12,1.52) | 3,544              | 5.79 (5.60,5.98)                 | 1.00 (0.90,1.11) | 2,506                    | 4.83 (4.64,5.02)                 | 0.83 (0.71,0.98) |
| Stroke                              | 1,896 | 3.08 (2.94,3.22)                 | 2,921        | 4.77 (4.60,4.94)                 | 1.55 (1.27,1.89) | 2,259                | 3.50 (3.36,3.65)                 | 1.14 (0.91,1.41) | 1,918              | 3.01 (2.88,3.15)                 | 0.98 (0.85,1.13) | 1,299                    | 2.39 (2.27,2.53)                 | 0.78 (0.62,0.97) |
| Myocardial infarction               | 817   | 1.29 (1.20,1.38)                 | 853          | 1.33 (1.24,1.42)                 | 1.03 (0.75,1.42) | 1,212                | 1.81 (1.71,1.92)                 | 1.40 (1.04,1.89) | 689                | 1.05 (0.97,1.13)                 | 0.81 (0.64,1.04) | 1,080                    | 1.93 (1.82,2.05)                 | 1.51 (0.60,3.79) |
| Heart Failure                       | 761   | 1.20 (1.12,1.29)                 | 1,942        | 3.05 (2.91,3.18)                 | 2.53 (2.02,3.17) | 1,489                | 2.24 (2.13,2.35)                 | 1.86 (1.44,2.40) | 812                | 1.24 (1.16,1.33)                 | 1.03 (0.81,1.31) | 679                      | 1.21 (1.13,1.31)                 | 1.01 (0.51,2.00) |
| Atrial fibrillation                 | 535   | 0.85 (0.78,0.93)                 | 943          | 1.49 (1.40,1.59)                 | 1.75 (1.27,2.42) | 742                  | 1.12 (1.04,1.21)                 | 1.32 (0.92,1.92) | 782                | 1.20 (1.12,1.29)                 | 1.41 (1.11,1.80) | 381                      | 0.68 (0.62,0.76)                 | 0.80 (0.51,1.25) |
| Coronary Artery Disease             | 1,445 | 2.35 (2.23,2.48)                 | 1,668        | 2.67 (2.55,2.80)                 | 1.14 (0.89,1.46) | 1,999                | 3.08 (2.95,3.22)                 | 1.31 (1.04,1.65) | 1,587              | 2.49 (2.37,2.62)                 | 1.06 (0.91,1.24) | 1,099                    | 2.04 (1.92,2.16)                 | 0.87 (0.69,1.10) |
| Deep vein thrombosis                | 109   | 0.17 (0.14,0.20)                 | 116          | 0.18 (0.15,0.22)                 | 1.06 (0.52,2.14) | 86                   | 0.13 (0.10,0.16)                 | 0.75 (0.31,1.81) | 136                | 0.21 (0.17,0.24)                 | 1.21 (0.70,2.08) | 48                       | 0.09 (0.06,0.11)                 | 0.50 (0.18,1.40) |
| Cardiovascular mortality            | 973   | 1.52 (1.43,1.62)                 | 1,770        | 2.73 (2.61,2.86)                 | 1.80 (1.43,2.25) | 1,146                | 1.70 (1.61,1.80)                 | 1.12 (0.85,1.48) | 641                | 0.97 (0.90,1.05)                 | 0.64 (0.49,0.84) | 467                      | 0.83 (0.76,0.91)                 | 0.54 (0.31,0.92) |
| Chronic pulmonary disease           | 360   | 0.57 (0.52,0.63)                 | 869          | 1.38 (1.29,1.47)                 | 2.40 (1.66,3.48) | 630                  | 0.96 (0.88,1.03)                 | 1.67 (1.11,2.52) | 378                | 0.58 (0.53,0.64)                 | 1.02 (0.74,1.40) | 194                      | 0.35 (0.30,0.40)                 | 0.62 (0.37,1.01) |
| Acute respiratory distress syndrome | 557   | 0.88 (0.80,0.95)                 | 870          | 1.36 (1.27,1.45)                 | 1.55 (1.08,2.23) | 577                  | 0.86 (0.79,0.93)                 | 0.98 (0.65,1.49) | 489                | 0.74 (0.68,0.81)                 | 0.85 (0.64,1.12) | 466                      | 0.83 (0.76,0.91)                 | 0.96 (0.45,2.07) |
| Seizure                             | 312   | 0.49 (0.44,0.55)                 | 1,095        | 1.72 (1.62,1.83)                 | 3.51 (2.46,5.01) | 772                  | 1.16 (1.08,1.24)                 | 2.36 (1.56,3.58) | 265                | 0.40 (0.36,0.45)                 | 0.82 (0.56,1.21) | 212                      | 0.38 (0.33,0.43)                 | 0.77 (0.26,2.28) |
| End-stage renal disease             | 52    | 0.08 (0.06,0.11)                 | 101          | 0.16 (0.13,0.19)                 | 1.90 (0.77,4.70) | 108                  | 0.16 (0.13,0.19)                 | 1.96 (0.87,4.38) | 91                 | 0.14 (0.11,0.17)                 | 1.67 (0.83,3.36) | 0                        | NA                               | NA               |
| Acute kidney injury                 | 300   | 0.47 (0.42,0.53)                 | 420          | 0.65 (0.59,0.72)                 | 1.38 (0.90,2.12) | 348                  | 0.52 (0.47,0.58)                 | 1.10 (0.66,1.83) | 270                | 0.41 (0.36,0.46)                 | 0.87 (0.57,1.32) | 98                       | 0.18 (0.14,0.21)                 | 0.37 (0.17,0.81) |
| Pancreatitis                        | 172   | 0.27 (0.23,0.31)                 | 237          | 0.37 (0.32,0.42)                 | 1.36 (0.70,2.66) | 161                  | 0.24 (0.21,0.28)                 | 0.89 (0.37,2.16) | 147                | 0.22 (0.19,0.26)                 | 0.83 (0.50,1.35) | 82                       | 0.14 (0.12,0.18)                 | 0.54 (0.24,1.18) |
| All-cause mortality                 | 7,977 | 12.48 (12.21,12.76)              | 16,415       | 25.36 (24.98,25.75)              | 2.03 (1.88,2.20) | 9,602                | 14.26 (13.97,14.54)              | 1.14 (1.04,1.26) | 5,567              | 8.41 (8.20,8.64)                 | 0.67 (0.61,0.74) | 7,956                    | 14.09 (13.78,14.40)              | 1.13 (0.77,1.65) |

Note: CI: confidence interval, REF: Reference group; Major CVD: Major Cardiovascular Disease; Composite outcome of stroke, heart failure and coronary artery disease  
Hazard Ratio (HR) and 95% Confidence Interval (95% CI) were estimated by Cox regression, HR >1 (or <1) indicates patients with COVID-19 had higher (lower) risk of sequelae compared to the non-COVID-19 control cohort  
Un-vaccinated, Incomplete vaccinated, Fully Vaccinated and Received booster dose of COVID-19 vaccines refers to patients who have received 0 dose, 1 doses, 2 doses and ≥3 doses of BioNtech or CoronaVac COVID-19 vaccines, respectively

**Supplementary Table 5. Incidence rate and hazard ratio of clinical sequelae in COVID-19 and non-COVID-19 cohort after weighting during 0-30, 31-90, 91-180, 181-270,271-365 days of SARS-CoV-2 infection (Cases of SARS-COV-2 infection from the Omicron wave in Hong Kong, continued)**

**271-365 days**

| Clinical sequelae                   | Controls (REF) |                                  |       | COVID-19                         |                   |       |                                  |                  |       |                                  |                  |       |                                  |                   |
|-------------------------------------|----------------|----------------------------------|-------|----------------------------------|-------------------|-------|----------------------------------|------------------|-------|----------------------------------|------------------|-------|----------------------------------|-------------------|
|                                     | Event          | Incidence per 1,000 person-years | Event | Unvaccinated                     |                   |       | Received single dose             |                  |       | Received two doses               |                  |       | Received booster dose(s)         |                   |
|                                     |                |                                  | Event | Incidence per 1,000 person-years | Hazard ratio      | Event | Incidence per 1,000 person-years | Hazard ratio     | Event | Incidence per 1,000 person-years | Hazard ratio     | Event | Incidence per 1,000 person-years | Hazard ratio      |
| Major CVD                           | 2,045          | 6.04 (5.78,6.30)                 | 2,419 | 7.47 (7.18,7.77)                 | 1.25 (1.01,1.53)  | 2,346 | 7.15 (6.87,7.45)                 | 1.18 (0.95,1.46) | 1,815 | 5.38 (5.14,5.63)                 | 0.89 (0.78,1.03) | 1,619 | 4.87 (4.64,5.12)                 | 0.80 (0.60,1.07)  |
| Stroke                              | 1,072          | 3.04 (2.86,3.22)                 | 1,143 | 3.39 (3.20,3.59)                 | 1.12 (0.83,1.52)  | 925   | 2.71 (2.54,2.89)                 | 0.89 (0.64,1.24) | 963   | 2.75 (2.58,2.92)                 | 0.91 (0.74,1.10) | 998   | 2.85 (2.68,3.03)                 | 0.93 (0.59,1.44)  |
| Myocardial infarction               | 500            | 1.37 (1.26,1.50)                 | 502   | 1.43 (1.31,1.56)                 | 1.05 (0.68,1.62)  | 650   | 1.84 (1.70,1.99)                 | 1.33 (0.89,1.99) | 459   | 1.27 (1.16,1.39)                 | 0.93 (0.69,1.26) | 242   | 0.67 (0.59,0.75)                 | 0.48 (0.30,0.77)  |
| Heart Failure                       | 569            | 1.57 (1.44,1.70)                 | 1,089 | 3.11 (2.93,3.30)                 | 2.01 (1.51,2.66)  | 938   | 2.67 (2.50,2.84)                 | 1.69 (1.25,2.30) | 654   | 1.82 (1.68,1.96)                 | 1.16 (0.89,1.52) | 391   | 1.08 (0.98,1.19)                 | 0.68 (0.32,1.44)  |
| Atrial fibrillation                 | 300            | 0.83 (0.74,0.93)                 | 498   | 1.43 (1.31,1.56)                 | 1.73 (1.07,2.79)  | 410   | 1.17 (1.07,1.29)                 | 1.42 (0.86,2.32) | 318   | 0.89 (0.79,0.99)                 | 1.07 (0.75,1.53) | 562   | 1.56 (1.43,1.69)                 | 1.87 (0.65,5.42)  |
| Coronary Artery Disease             | 843            | 2.39 (2.23,2.56)                 | 818   | 2.39 (2.23,2.56)                 | 1.00 (0.70,1.42)  | 994   | 2.90 (2.72,3.08)                 | 1.21 (0.87,1.69) | 678   | 1.93 (1.79,2.08)                 | 0.81 (0.64,1.03) | 644   | 1.85 (1.71,2.00)                 | 0.77 (0.51,1.16)  |
| Deep vein thrombosis                | 57             | 0.15 (0.12,0.20)                 | 143   | 0.40 (0.34,0.48)                 | 2.64 (1.15,6.06)  | 31    | 0.09 (0.06,0.12)                 | 0.56 (0.13,2.29) | 29    | 0.08 (0.06,0.11)                 | 0.53 (0.18,1.50) | 28    | 0.08 (0.05,0.11)                 | 0.48 (0.12,2.01)  |
| Cardiovascular mortality            | 57             | 0.15 (0.12,0.20)                 | 94    | 0.26 (0.21,0.32)                 | 1.71 (0.68,4.31)  | 52    | 0.15 (0.11,0.19)                 | 0.93 (0.28,3.07) | 8     | 0.02 (0.01,0.04)                 | 0.14 (0.02,0.99) | 0     | NA                               | NA                |
| Chronic pulmonary disease           | 282            | 0.78 (0.69,0.88)                 | 362   | 1.05 (0.94,1.16)                 | 1.35 (0.79,2.30)  | 465   | 1.34 (1.22,1.46)                 | 1.70 (1.04,2.79) | 341   | 0.96 (0.86,1.06)                 | 1.23 (0.85,1.76) | 108   | 0.30 (0.25,0.36)                 | 0.38 (0.19,0.76)  |
| Acute respiratory distress syndrome | 266            | 0.73 (0.64,0.82)                 | 357   | 1.01 (0.91,1.12)                 | 1.39 (0.79,2.45)  | 494   | 1.40 (1.28,1.53)                 | 1.90 (1.23,2.93) | 302   | 0.83 (0.74,0.93)                 | 1.14 (0.77,1.69) | 595   | 1.64 (1.51,1.78)                 | 2.21 (0.63,7.75)  |
| Seizure                             | 176            | 0.48 (0.42,0.56)                 | 270   | 0.77 (0.68,0.87)                 | 1.61 (0.85,3.05)  | 312   | 0.89 (0.79,0.99)                 | 1.82 (1.00,3.33) | 142   | 0.39 (0.33,0.46)                 | 0.81 (0.51,1.28) | 125   | 0.34 (0.29,0.41)                 | 0.70 (0.19,2.59)  |
| End-stage renal disease             | 39             | 0.11 (0.08,0.15)                 | 170   | 0.48 (0.41,0.55)                 | 4.56 (1.90,10.91) | 56    | 0.16 (0.12,0.20)                 | 1.46 (0.43,4.96) | 4     | 0.01 (0.00,0.03)                 | 0.11 (0.01,0.83) | 57    | 0.16 (0.12,0.20)                 | 1.41 (0.19,10.56) |
| Acute kidney injury                 | 145            | 0.40 (0.34,0.46)                 | 182   | 0.52 (0.45,0.60)                 | 1.31 (0.69,2.48)  | 92    | 0.26 (0.21,0.32)                 | 0.65 (0.26,1.65) | 95    | 0.26 (0.21,0.32)                 | 0.66 (0.35,1.26) | 419   | 1.15 (1.04,1.26)                 | 2.80 (0.51,15.39) |
| Pancreatitis                        | 79             | 0.22 (0.17,0.27)                 | 207   | 0.59 (0.51,0.67)                 | 2.72 (1.22,6.03)  | 117   | 0.33 (0.27,0.39)                 | 1.50 (0.54,4.18) | 34    | 0.09 (0.06,0.13)                 | 0.43 (0.17,1.10) | 19    | 0.05 (0.03,0.08)                 | 0.24 (0.03,1.72)  |
| All-cause mortality                 | 4,495          | 12.27 (11.91,12.63)              | 9,819 | 27.68 (27.14,28.24)              | 2.27 (2.05,2.50)  | 4,375 | 12.31 (11.95,12.68)              | 1.00 (0.87,1.15) | 3,374 | 9.28 (8.97,9.60)                 | 0.76 (0.67,0.85) | 1,423 | 3.88 (3.68,4.09)                 | 0.31 (0.21,0.47)  |

Note: CI: confidence interval, REF: Reference group; Major CVD: Major Cardiovascular Disease; Composite outcome of stroke, heart failure and coronary artery disease  
Hazard Ratio (HR) and 95% Confidence Interval (95% CI) were estimated by Cox regression, HR >1 (or <1) indicates patients with COVID-19 had higher (lower) risk of sequelae compared to the non-COVID-19 control cohort  
Un-vaccinated, Incomplete vaccinated, Fully Vaccinated and Received booster dose of COVID-19 vaccines refers to patients who have received 0 dose, 1 doses, 2 doses and ≥3 doses of BioNtech or CoronaVac COVID-19 vaccines, respectively

**Supplementary Table 6. Baseline characteristics of unvaccinated patients with COVID-19 and matched control with the same vaccination status from the Hong Kong Hospital Authority before propensity-score weighting.**

| <b>Hong Kong Hospital Authority</b><br><b>(April 1st, 2020 to October 31st, 2022)</b> |                               |                                |                        |
|---------------------------------------------------------------------------------------|-------------------------------|--------------------------------|------------------------|
| <b>Baseline characteristics</b>                                                       | <b>Controls</b><br>(N=81,101) | <b>COVID-19</b><br>(N=124,443) | <b>SMD<sup>b</sup></b> |
|                                                                                       | <b>N / Mean (% / SD)</b>      | <b>N / Mean (% / SD)</b>       |                        |
| Age (years)                                                                           | 64.8 (22.51)                  | 60.2 (21.93)                   | 0.208                  |
| Sex, male                                                                             | 33,467 (41.3)                 | 55,091 (44.3)                  | 0.061                  |
| Charlson Comorbidity Index                                                            | 2.78 (2.34)                   | 2.61 (2.53)                    | 0.068                  |
| <b>Pre-existing morbidities</b>                                                       |                               |                                |                        |
| Respiratory disease                                                                   | 2,975 (3.7)                   | 5,942 (4.8)                    | 0.055                  |
| Diabetes                                                                              | 12,790 (15.8)                 | 21,585 (17.3)                  | 0.042                  |
| Cardiovascular disease                                                                | 13,296 (16.4)                 | 24,098 (19.4)                  | 0.078                  |
| Myocardial Infarction                                                                 | 1,349 (1.7)                   | 3,019 (2.4)                    | 0.054                  |
| Chronic heart failure                                                                 | 2,871 (3.5)                   | 5,846 (4.7)                    | 0.058                  |
| Peripheral vascular disease                                                           | 537 (0.7)                     | 1,185 (1.0)                    | 0.032                  |
| Cerebrovascular disease                                                               | 6,779 (8.4)                   | 12,920 (10.4)                  | 0.069                  |
| COPD                                                                                  | 2,965 (3.7)                   | 5,900 (4.7)                    | 0.054                  |
| Dementia                                                                              | 1,192 (1.5)                   | 2,795 (2.2)                    | 0.058                  |
| Paralysis                                                                             | 463 (0.6)                     | 1,105 (0.9)                    | 0.037                  |
| Diabetes without chronic complication                                                 | 12,012 (14.8)                 | 19,919 (16.0)                  | 0.033                  |
| Diabetes with chronic complication                                                    | 1,061 (1.3)                   | 2,523 (2.0)                    | 0.056                  |
| Chronic Kidney Disease                                                                | 2,386 (2.9)                   | 4,957 (4.0)                    | 0.057                  |
| Mild liver disease                                                                    | 167 (0.2)                     | 523 (0.4)                      | 0.038                  |
| Moderate-severe liver disease                                                         | 126 (0.2)                     | 396 (0.3)                      | 0.034                  |
| Ulcers                                                                                | 1,314 (1.6)                   | 2,754 (2.2)                    | 0.043                  |
| Rheumatoid arthritis and other inflammatory polyarthropathies                         | 411 (0.5)                     | 912 (0.7)                      | 0.029                  |
| Acquired Immune Deficiency Syndrome (AIDS)                                            | 0 (0.0)                       | 0 (0.0)                        | <0.001                 |
| Malignancy                                                                            | 3,294 (4.1)                   | 7,166 (5.8)                    | 0.079                  |
| Metastatic solid tumour                                                               | 728 (0.9)                     | 1,698 (1.4)                    | 0.044                  |
| <b>Medication history</b>                                                             |                               |                                |                        |

|                                         |               |               |       |
|-----------------------------------------|---------------|---------------|-------|
| Renin-angiotensin-system agents         | 15,154 (18.7) | 27,128 (21.8) | 0.078 |
| Beta blockers                           | 10,438 (12.9) | 20,025 (16.1) | 0.092 |
| Calcium channel blockers                | 21,174 (26.1) | 35,937 (28.9) | 0.062 |
| Diuretics                               | 5,444 (6.7)   | 11,741 (9.4)  | 0.100 |
| Nitrates                                | 3,730 (4.6)   | 7,452 (6.0)   | 0.062 |
| Lipid lowering agents                   | 19,869 (24.5) | 35,491 (28.5) | 0.091 |
| Insulins                                | 2,226 (2.7)   | 5,867 (4.7)   | 0.104 |
| Antidiabetic drugs                      | 9,996 (12.3)  | 19,480 (15.7) | 0.096 |
| Oral anticoagulants                     | 2,475 (3.1)   | 4,928 (4.0)   | 0.049 |
| Antiplatelets                           | 11,508 (14.2) | 22,446 (18.0) | 0.105 |
| Immunosuppressants                      | 406 (0.5)     | 1,241 (1.0)   | 0.058 |
| <b>Number of past healthcare visits</b> |               |               |       |
| Hospital admission                      | 14,926 (18.4) | 38,425 (30.9) | 0.293 |
| Doctor consultation                     | 3 (3.87)      | 4 (4.83)      | 0.259 |

---

**Supplementary Table 7. Incidence rate and hazard ratio of clinical sequelae in COVID-19 and non-COVID-19 cohort after weighting during 0-30, 31-90, 91-180, 181-270,271-365 days of SARS-CoV-2 infection (unvaccinated patients with COVID-19 and matched control with the same vaccination status)**

| Clinical sequelae                   | Day 0-30     |                                           |          |                                           |                                    | Day 31-90    |                                           |          |                                           |                                    |
|-------------------------------------|--------------|-------------------------------------------|----------|-------------------------------------------|------------------------------------|--------------|-------------------------------------------|----------|-------------------------------------------|------------------------------------|
|                                     | Non-COVID-19 |                                           | COVID-19 |                                           |                                    | Non-COVID-19 |                                           | COVID-19 |                                           |                                    |
|                                     | Event        | Incidence per 1,000 person-years (95% CI) | Event    | Incidence per 1,000 person-years (95% CI) | Hazard Ratio <sup>a</sup> (95% CI) | Event        | Incidence per 1,000 person-years (95% CI) | Event    | Incidence per 1,000 person-years (95% CI) | Hazard Ratio <sup>a</sup> (95% CI) |
| Major CVD                           | 68           | 12.07 (9.50,15.26)                        | 309      | 36.96 (32.99,41.24)                       | 3.03 (2.29,4.01)                   | 127          | 11.40 (9.58,13.56)                        | 274      | 17.29 (15.31,19.41)                       | 1.52 (1.21,1.89)                   |
| Stroke                              | 42           | 6.73 (4.87,8.95)                          | 188      | 20.64 (17.86,23.76)                       | 3.02 (2.12,4.31)                   | 72           | 5.91 (4.69,7.44)                          | 147      | 8.51 (7.20,9.95)                          | 1.44 (1.06,1.95)                   |
| Myocardial infarction               | 22           | 3.33 (2.17,4.96)                          | 123      | 12.38 (10.37,14.75)                       | 3.67 (2.32,5.79)                   | 39           | 3.00 (2.18,4.06)                          | 77       | 4.11 (3.29,5.13)                          | 1.37 (0.91,2.06)                   |
| Heart Failure                       | 25           | 3.83 (2.59,5.62)                          | 85       | 8.77 (7.07,10.80)                         | 2.27 (1.43,3.62)                   | 54           | 4.18 (3.16,5.39)                          | 143      | 7.81 (6.61,9.17)                          | 1.86 (1.33,2.61)                   |
| Atrial fibrillation                 | 3            | 0.53 (0.17,1.35)                          | 44       | 4.53 (3.31,6.00)                          | 8.42 (2.88,24.58)                  | 28           | 2.21 (1.52,3.17)                          | 63       | 3.43 (2.65,4.36)                          | 1.55 (0.97,2.49)                   |
| Coronary Artery Disease             | 26           | 4.12 (2.81,6.02)                          | 126      | 13.39 (11.22,15.90)                       | 3.22 (2.05,5.05)                   | 57           | 4.58 (3.49,5.87)                          | 118      | 6.63 (5.53,7.93)                          | 1.45 (1.03,2.04)                   |
| Deep vein thrombosis                | 7            | 0.98 (0.41,1.91)                          | 15       | 1.52 (0.90,2.45)                          | 1.54 (0.47,5.03)                   | 8            | 0.57 (0.26,1.08)                          | 20       | 1.07 (0.68,1.62)                          | 1.87 (0.81,4.33)                   |
| Cardiovascular mortality            | 152          | 22.24 (18.94,26.01)                       | 467      | 45.96 (41.88,50.22)                       | 2.05 (1.67,2.51)                   | 141          | 10.52 (8.88,12.36)                        | 194      | 10.13 (8.76,11.61)                        | 0.96 (0.76,1.22)                   |
| Chronic pulmonary disease           | 6            | 0.87 (0.33,1.77)                          | 23       | 2.34 (1.50,3.43)                          | 2.67 (0.80,8.91)                   | 14           | 1.10 (0.65,1.82)                          | 41       | 2.25 (1.65,3.04)                          | 2.04 (1.02,4.11)                   |
| Acute respiratory distress syndrome | 7            | 1.03 (0.42,1.93)                          | 64       | 6.43 (5.02,8.18)                          | 6.16 (2.59,14.69)                  | 22           | 1.64 (1.04,2.43)                          | 44       | 2.35 (1.74,3.13)                          | 1.43 (0.84,2.42)                   |
| Seizure                             | 6            | 0.85 (0.32,1.72)                          | 32       | 3.23 (2.27,4.52)                          | 3.78 (1.41,10.14)                  | 15           | 1.15 (0.69,1.87)                          | 26       | 1.39 (0.95,2.02)                          | 1.21 (0.58,2.53)                   |
| End-stage renal disease             | 5            | 0.79 (0.32,1.71)                          | 17       | 1.68 (1.05,2.69)                          | 2.12 (0.78,5.75)                   | 5            | 0.36 (0.12,0.77)                          | 6        | 0.34 (0.15,0.68)                          | 0.95 (0.29,3.08)                   |
| Acute kidney injury                 | 5            | 0.78 (0.33,1.73)                          | 54       | 5.43 (4.15,7.06)                          | 6.97 (2.64,18.40)                  | 18           | 1.36 (0.81,2.06)                          | 47       | 2.49 (1.83,3.26)                          | 1.83 (1.04,3.25)                   |
| Pancreatitis                        | 1            | 0.13 (0.00,0.54)                          | 14       | 1.40 (0.83,2.32)                          | 10.36 (1.34,80.17)                 | 2            | 0.16 (0.05,0.54)                          | 18       | 0.92 (0.56,1.43)                          | 5.69 (1.66,19.56)                  |
| All-cause mortality                 | 835          | 121.86 (113.77,130.30)                    | 7,445    | 732.67 (716.13,749.42)                    | 5.97 (5.50,6.49)                   | 813          | 60.82 (56.72,65.08)                       | 1,950    | 101.90 (97.42,106.47)                     | 1.67 (1.52,1.83)                   |

**Supplementary Table 7. Incidence rate and hazard ratio of clinical sequelae in COVID-19 and non-COVID-19 cohort after weighting during 0-30, 31-90, 91-180, 181-270,271-365 days of SARS-CoV-2 infection (unvaccinated patients with COVID-19 and matched control with the same vaccination status; continued)**

| Clinical sequelae                   | Day 91-180   |                                           |          |                                           |                                    | Day 181-270  |                                           |          |                                           |                                    |
|-------------------------------------|--------------|-------------------------------------------|----------|-------------------------------------------|------------------------------------|--------------|-------------------------------------------|----------|-------------------------------------------|------------------------------------|
|                                     | Non-COVID-19 |                                           | COVID-19 |                                           |                                    | Non-COVID-19 |                                           | COVID-19 |                                           |                                    |
|                                     | Event        | Incidence per 1,000 person-years (95% CI) | Event    | Incidence per 1,000 person-years (95% CI) | Hazard Ratio <sup>a</sup> (95% CI) | Event        | Incidence per 1,000 person-years (95% CI) | Event    | Incidence per 1,000 person-years (95% CI) | Hazard Ratio <sup>a</sup> (95% CI) |
| Major CVD                           | 159          | 9.84 (8.37,11.43)                         | 275      | 12.60 (11.16,14.13)                       | 1.28 (1.04,1.56)                   | 173          | 11.21 (9.65,13.00)                        | 261      | 13.34 (11.78,15.01)                       | 1.19 (0.97,1.46)                   |
| Stroke                              | 94           | 5.31 (4.31,6.46)                          | 144      | 6.06 (5.15,7.13)                          | 1.14 (0.87,1.50)                   | 105          | 6.24 (5.14,7.53)                          | 154      | 7.24 (6.17,8.46)                          | 1.16 (0.89,1.51)                   |
| Myocardial infarction               | 45           | 2.37 (1.73,3.12)                          | 72       | 2.76 (2.18,3.46)                          | 1.17 (0.78,1.74)                   | 44           | 2.43 (1.81,3.25)                          | 59       | 2.55 (1.97,3.28)                          | 1.05 (0.70,1.58)                   |
| Heart Failure                       | 61           | 3.28 (2.56,4.21)                          | 124      | 4.87 (4.07,5.79)                          | 1.48 (1.09,2.02)                   | 75           | 4.22 (3.36,5.28)                          | 130      | 5.70 (4.77,6.74)                          | 1.35 (0.99,1.85)                   |
| Atrial fibrillation                 | 36           | 1.93 (1.37,2.64)                          | 58       | 2.30 (1.75,2.93)                          | 1.19 (0.76,1.87)                   | 45           | 2.54 (1.86,3.34)                          | 56       | 2.47 (1.87,3.17)                          | 0.97 (0.63,1.50)                   |
| Coronary Artery Disease             | 64           | 3.57 (2.75,4.50)                          | 120      | 4.90 (4.08,5.84)                          | 1.37 (0.99,1.91)                   | 59           | 3.47 (2.67,4.44)                          | 96       | 4.35 (3.53,5.27)                          | 1.26 (0.89,1.77)                   |
| Deep vein thrombosis                | 5            | 0.28 (0.11,0.61)                          | 13       | 0.48 (0.26,0.80)                          | 1.75 (0.62,4.96)                   | 7            | 0.41 (0.19,0.78)                          | 9        | 0.38 (0.20,0.72)                          | 0.94 (0.34,2.56)                   |
| Cardiovascular mortality            | 153          | 7.91 (6.72,9.23)                          | 187      | 7.07 (6.10,8.13)                          | 0.89 (0.71,1.12)                   | 131          | 7.07 (5.93,8.35)                          | 132      | 5.59 (4.70,6.61)                          | 0.79 (0.60,1.03)                   |
| Chronic pulmonary disease           | 34           | 1.82 (1.26,2.48)                          | 41       | 1.63 (1.20,2.20)                          | 0.90 (0.55,1.46)                   | 17           | 0.94 (0.55,1.45)                          | 50       | 2.18 (1.64,2.86)                          | 2.32 (1.28,4.23)                   |
| Acute respiratory distress syndrome | 38           | 2.01 (1.45,2.73)                          | 61       | 2.33 (1.79,2.97)                          | 1.16 (0.75,1.80)                   | 29           | 1.59 (1.11,2.28)                          | 44       | 1.90 (1.40,2.53)                          | 1.20 (0.73,1.98)                   |
| Seizure                             | 21           | 1.10 (0.72,1.68)                          | 42       | 1.62 (1.20,2.19)                          | 1.46 (0.82,2.61)                   | 22           | 1.22 (0.80,1.82)                          | 45       | 1.95 (1.45,2.59)                          | 1.59 (0.91,2.78)                   |
| End-stage renal disease             | 11           | 0.59 (0.32,1.02)                          | 7        | 0.28 (0.13,0.55)                          | 0.48 (0.18,1.29)                   | 2            | 0.08 (0.01,0.30)                          | 6        | 0.25 (0.09,0.49)                          | 2.97 (0.58,15.12)                  |
| Acute kidney injury                 | 32           | 1.66 (1.15,2.31)                          | 38       | 1.47 (1.07,2.01)                          | 0.88 (0.53,1.47)                   | 35           | 1.90 (1.33,2.60)                          | 37       | 1.57 (1.12,2.14)                          | 0.83 (0.48,1.42)                   |
| Pancreatitis                        | 9            | 0.46 (0.21,0.82)                          | 13       | 0.48 (0.26,0.80)                          | 1.04 (0.40,2.69)                   | 2            | 0.16 (0.05,0.54)                          | 17       | 0.71 (0.42,1.10)                          | 1.72 (0.70,4.26)                   |
| All-cause mortality                 | 979          | 50.76 (47.66,54.02)                       | 1,427    | 54.04 (51.31,56.92)                       | 1.06 (0.97,1.16)                   | 813          | 60.82 (56.72,65.08)                       | 1,192    | 50.31 (47.50,53.21)                       | 0.93 (0.85,1.02)                   |

**Supplementary Table 7. Incidence rate and hazard ratio of clinical sequelae in COVID-19 and non-COVID-19 cohort after weighting during 0-30, 31-90, 91-180, 181-270,271-365 days of SARS-CoV-2 infection (unvaccinated patients with COVID-19 and matched control with the same vaccination status; continued)**

| Day 271-365                         |              |                                              |          |                                              |                                       |
|-------------------------------------|--------------|----------------------------------------------|----------|----------------------------------------------|---------------------------------------|
| Clinical sequelae                   | Non-COVID-19 |                                              | COVID-19 |                                              | Hazard Ratio <sup>a</sup><br>(95% CI) |
|                                     | Event        | Incidence per 1,000 person-years<br>(95% CI) | Event    | Incidence per 1,000 person-years<br>(95% CI) |                                       |
| Major CVD                           | 130          | 11.03 (9.24,13.03)                           | 134      | 11.25 (9.44,13.25)                           | 0.92 (0.71,1.19)                      |
| Stroke                              | 71           | 5.59 (4.37,6.97)                             | 68       | 5.28 (4.12,6.63)                             | 0.86 (0.60,1.24)                      |
| Myocardial infarction               | 40           | 2.95 (2.12,3.95)                             | 32       | 2.28 (1.58,3.18)                             | 0.72 (0.44,1.16)                      |
| Heart Failure                       | 58           | 4.37 (3.38,5.64)                             | 75       | 5.53 (4.40,6.91)                             | 1.14 (0.79,1.65)                      |
| Atrial fibrillation                 | 18           | 1.38 (0.87,2.15)                             | 27       | 2.02 (1.38,2.91)                             | 1.41 (0.76,2.61)                      |
| Coronary Artery Disease             | 56           | 4.40 (3.36,5.67)                             | 44       | 3.30 (2.43,4.39)                             | 0.68 (0.45,1.03)                      |
| Deep vein thrombosis                | 6            | 0.41 (0.16,0.85)                             | 8        | 0.59 (0.29,1.12)                             | 1.30 (0.41,4.13)                      |
| Cardiovascular mortality            | 39           | 2.82 (2.02,3.81)                             | 13       | 0.92 (0.54,1.58)                             | 0.34 (0.17,0.70)                      |
| Chronic pulmonary disease           | 21           | 1.58 (1.04,2.41)                             | 22       | 1.60 (1.02,2.37)                             | 0.90 (0.48,1.72)                      |
| Acute respiratory distress syndrome | 21           | 1.57 (1.02,2.36)                             | 19       | 1.36 (0.82,2.05)                             | 0.78 (0.40,1.50)                      |
| Seizure                             | 6            | 0.41 (0.16,0.86)                             | 14       | 1.00 (0.55,1.60)                             | 2.20 (0.77,6.29)                      |
| End-stage renal disease             | 5            | 0.39 (0.16,0.85)                             | 9        | 0.61 (0.29,1.12)                             | 1.38 (0.40,4.70)                      |
| Acute kidney injury                 | 20           | 1.48 (0.96,2.27)                             | 18       | 1.32 (0.82,2.05)                             | 0.81 (0.37,1.76)                      |
| Pancreatitis                        | 6            | 0.45 (0.21,0.96)                             | 10       | 0.68 (0.34,1.22)                             | 1.41 (0.53,3.76)                      |
| All-cause mortality                 | 628          | 45.80 (42.30,49.47)                          | 735      | 52.23 (48.53,56.08)                          | 1.04 (0.93,1.17)                      |

Note: CI: confidence interval, REF: Reference group; Major CVD: Major Cardiovascular Disease; Composite outcome of stroke, heart failure and coronary artery disease

Hazard Ratio (HR) and 95% Confidence Interval (95% CI) were estimated by Cox regression, HR >1 (or <1) indicates patients with COVID-19 had higher (lower) risk of sequelae compared to the non-COVID-19 control cohort

**Supplementary Table 8. Baseline characteristics of patients with SARS-CoV-2 infection less than 6 months after the date of last dose of vaccination stratified by vaccine status and controls from the Hong Kong Hospital Authority before propensity-score weighting.**

| <b>Hong Kong Hospital Authority<br/>(April 1st, 2020 to October 31st, 2022)</b> |                                    |                                       |                                                   |                                          |                                               |                        |
|---------------------------------------------------------------------------------|------------------------------------|---------------------------------------|---------------------------------------------------|------------------------------------------|-----------------------------------------------|------------------------|
| <b>Baseline characteristics</b>                                                 | <b>COVID-19</b>                    |                                       |                                                   |                                          |                                               | <b>SMD<sup>b</sup></b> |
|                                                                                 | <b>Controls<br/>(N= 1,958,380)</b> | <b>Un-vaccinated<br/>(N= 124,443)</b> | <b>Incomplete<br/>vaccination<br/>(N= 98,810)</b> | <b>Fully vaccinated<br/>(N= 247,162)</b> | <b>Received booster dose<br/>(N= 386,228)</b> |                        |
|                                                                                 | <b>N / Mean (% / SD)</b>           | <b>N / Mean (% / SD)</b>              | <b>N / Mean (% / SD)</b>                          | <b>N / Mean (% / SD)</b>                 | <b>N / Mean (% / SD)</b>                      |                        |
| Age (years)                                                                     | 56.8 (18.46)                       | 60.2 (21.93)                          | 60.1 (19.69)                                      | 54.4 (18.51)                             | 52.6 (16.50)                                  | 0.221                  |
| Sex, male                                                                       | 853,473 (43.6)                     | 55,091 (44.3)                         | 43,460 (44.0)                                     | 107,080 (43.3)                           | 179,905 (46.6)                                | 0.029                  |
| Charlson Comorbidity Index                                                      | 1.89 (1.86)                        | 2.61 (2.53)                           | 2.41 (2.20)                                       | 1.78 (1.89)                              | 1.42 (1.62)                                   | 0.296                  |
| <b>Pre-existing morbidities</b>                                                 |                                    |                                       |                                                   |                                          |                                               |                        |
| Respiratory disease                                                             | 39,696 (2.0)                       | 5,942 (4.8)                           | 3,711 (3.8)                                       | 6,008 (2.4)                              | 6,537 (1.7)                                   | 0.091                  |
| Diabetes                                                                        | 249,200 (12.7)                     | 21,585 (17.3)                         | 18,226 (18.4)                                     | 36,897 (14.9)                            | 41,022 (10.6)                                 | 0.115                  |
| Cardiovascular disease                                                          | 167,816 (8.6)                      | 24,098 (19.4)                         | 14,549 (14.7)                                     | 22,393 (9.1)                             | 23,196 (6.0)                                  | 0.204                  |
| Myocardial Infarction                                                           | 21,448 (1.1)                       | 5,846 (4.7)                           | 2,585 (2.6)                                       | 3,098 (1.3)                              | 2,240 (0.6)                                   | 0.131                  |
| Chronic heart failure                                                           | 5,789 (0.3)                        | 1,185 (1.0)                           | 562 (0.6)                                         | 718 (0.3)                                | 667 (0.2)                                     | 0.052                  |
| Peripheral vascular disease                                                     | 78,085 (4.0)                       | 12,920 (10.4)                         | 7,333 (7.4)                                       | 10,268 (4.2)                             | 9,475 (2.5)                                   | 0.163                  |
| Cerebrovascular disease                                                         | 39,568 (2.0)                       | 5,900 (4.7)                           | 3,694 (3.7)                                       | 5,995 (2.4)                              | 6,528 (1.7)                                   | 0.091                  |
| COPD                                                                            | 6,585 (0.3)                        | 2,795 (2.2)                           | 1,352 (1.4)                                       | 1,191 (0.5)                              | 552 (0.1)                                     | 0.105                  |
| Dementia                                                                        | 4,438 (0.2)                        | 1,105 (0.9)                           | 479 (0.5)                                         | 576 (0.2)                                | 454 (0.1)                                     | 0.054                  |
| Paralysis                                                                       | 238,406 (12.2)                     | 19,919 (16.0)                         | 17,245 (17.5)                                     | 35,300 (14.3)                            | 39,489 (10.2)                                 | 0.106                  |
| Diabetes without chronic complication                                           | 15,767 (0.8)                       | 2,523 (2.0)                           | 1,465 (1.5)                                       | 2,373 (1.0)                              | 2,255 (0.6)                                   | 0.065                  |
| Diabetes with chronic complication                                              | 25,299 (1.3)                       | 4,957 (4.0)                           | 2,712 (2.7)                                       | 3,627 (1.5)                              | 3,375 (0.9)                                   | 0.104                  |
| Chronic Kidney Disease                                                          | 2,885 (0.1)                        | 523 (0.4)                             | 252 (0.3)                                         | 468 (0.2)                                | 422 (0.1)                                     | 0.030                  |
| Mild liver disease                                                              | 1,899 (0.1)                        | 396 (0.3)                             | 166 (0.2)                                         | 345 (0.1)                                | 269 (0.1)                                     | 0.027                  |
| Moderate-severe liver disease                                                   | 21,041 (1.1)                       | 2,754 (2.2)                           | 1,695 (1.7)                                       | 2,965 (1.2)                              | 3,304 (0.9)                                   | 0.056                  |
| Ulcers                                                                          | 8,174 (0.4)                        | 912 (0.7)                             | 616 (0.6)                                         | 1,342 (0.5)                              | 1,512 (0.4)                                   | 0.024                  |
| Rheumatoid arthritis and other inflammatory polyarthropathies                   | 4 (0.0)                            | 0 (0.0)                               | 0 (0.0)                                           | 0 (0.0)                                  | 0 (0.0)                                       | 0.001                  |



|                                            |                |                 |                |                 |                 |       |
|--------------------------------------------|----------------|-----------------|----------------|-----------------|-----------------|-------|
| Acquired Immune Deficiency Syndrome (AIDS) | 59,887 (3.1)   | 7,166 (5.8)     | 4,914 (5.0)    | 8,757 (3.5)     | 9,048 (2.3)     | 0.090 |
| Malignancy                                 | 9,402 (0.5)    | 1,698 (1.4)     | 923 (0.9)      | 1,372 (0.6)     | 1,144 (0.3)     | 0.059 |
| Metastatic solid tumour                    | 21,448 (1.1)   | 5,846 (4.7)     | 2,585 (2.6)    | 3,098 (1.3)     | 2,240 (0.6)     | 0.131 |
| <b>Medication history</b>                  |                |                 |                |                 |                 |       |
| Renin-angiotensin-system agents            | 303,826 (15.5) | 27,128 (21.8)   | 22,485 (22.8)  | 44,418 (18.0)   | 51,359 (13.3)   | 0.132 |
| Beta blockers                              | 192,039 (9.8)  | 20,025 (16.1)   | 15,468 (15.7)  | 28,406 (11.5)   | 29,634 (7.7)    | 0.140 |
| Calcium channel blockers                   | 431,715 (22.0) | 35,937 (28.9)   | 30,883 (31.3)  | 61,354 (24.8)   | 71,781 (18.6)   | 0.150 |
| Diuretics                                  | 65,281 (3.3)   | 11,741 (9.4)    | 6,499 (6.6)    | 9,417 (3.8)     | 9,125 (2.4)     | 0.154 |
| Nitrates                                   | 47,598 (2.4)   | 7,452 (6.0)     | 4,424 (4.5)    | 6,651 (2.7)     | 7,138 (1.8)     | 0.110 |
| Lipid lowering agents                      | 442,712 (22.6) | 35,491 (28.5)   | 30,616 (31.0)  | 61,557 (24.9)   | 75,646 (19.6)   | 0.133 |
| Insulins                                   | 35,073 (1.8)   | 5,867 (4.7)     | 3,400 (3.4)    | 5,602 (2.3)     | 5,177 (1.3)     | 0.101 |
| Antidiabetic drugs                         | 229,320 (11.7) | 19,480 (15.7)   | 17,472 (17.7)  | 35,971 (14.6)   | 39,816 (10.3)   | 0.109 |
| Oral anticoagulants                        | 26,609 (1.4)   | 4,928 (4.0)     | 2,760 (2.8)    | 3,626 (1.5)     | 3,391 (0.9)     | 0.103 |
| Antiplatelets                              | 173,270 (8.8)  | 22,446 (18.0)   | 14,887 (15.1)  | 24,178 (9.8)    | 25,743 (6.7)    | 0.180 |
| Immunosuppressants                         | 8,568 (0.4)    | 1,241 (1.0)     | 806 (0.8)      | 1,550 (0.6)     | 1,899 (0.5)     | 0.035 |
| <b>Number of past healthcare visits</b>    |                |                 |                |                 |                 |       |
| Hospital admission                         | 0 (2.0)        | 1 (5.3)         | 1 (4.7)        | 0 (3.6)         | 0 (2.8)         | 0.121 |
| Doctor consultation                        | 2.8 (3.8)      | 3.8 (4.8)       | 4.1 (4.6)      | 3.5 (4.3)       | 2.8 (3.7)       | 0.168 |
| <b>Doses of COVID-19 vaccines received</b> |                |                 |                |                 |                 |       |
| 0                                          | 342,110 (17.5) | 124,443 (100.0) | 0 (0.0)        | 0 (0.0)         | 0 (0.0)         |       |
| 1                                          | 156,258 (8.0)  | 0 (0.0)         | 98,810 (100.0) | 0 (0.0)         | 0 (0.0)         |       |
| 2                                          | 672,157 (34.3) | 0 (0.0)         | 0 (0.0)        | 247,162 (100.0) | 0 (0.0)         |       |
| 3 or above                                 | 787,855 (40.2) | 0 (0.0)         | 0 (0.0)        | 0 (0.0)         | 386,228 (100.0) |       |

**Supplementary Table 9. Incidence rate and hazard ratio of clinical sequelae in COVID-19 and non-COVID-19 cohort after weighting during 0-30, 31-90, 91-180, 181-270,271-365 days of SARS-CoV-2 infection (Excluding patients with incident SARS-CoV-2 infection over 6 months after the last dose of COVID-19 vaccination)**

**0-30 days**

| Clinical sequelae                   | Controls (REF) |                                  |        | COVID-19                         |                        |        |                                  |                  |        |                                  |                  |       |                                  |                  |
|-------------------------------------|----------------|----------------------------------|--------|----------------------------------|------------------------|--------|----------------------------------|------------------|--------|----------------------------------|------------------|-------|----------------------------------|------------------|
|                                     | Event          | Incidence per 1,000 person-years |        | Unvaccinated                     |                        |        | Received single dose             |                  |        | Received two doses               |                  |       | Received booster dose(s)         |                  |
|                                     |                |                                  | Event  | Incidence per 1,000 person-years | Hazard ratio           | Event  | Incidence per 1,000 person-years | Hazard ratio     | Event  | Incidence per 1,000 person-years | Hazard ratio     | Event | Incidence per 1,000 person-years | Hazard ratio     |
| Major CVD                           | 1,068          | 4.90 (4.61,5.20)                 | 5,103  | 24.44<br>(23.78,25.12)           | 4.96 (4.27,5.76)       | 3,435  | 16.11<br>(15.58,16.65)           | 3.28 (2.72,3.95) | 2,935  | 13.58<br>(13.09,14.08)           | 2.77 (2.37,3.23) | 2,272 | 10.41<br>(9.99,10.84)            | 2.12 (1.81,2.49) |
| Stroke                              | 680            | 2.97 (2.75,3.20)                 | 3,091  | 14.14<br>(13.65,14.64)           | 4.72 (3.89,5.74)       | 2,098  | 9.39 (8.99,9.80)                 | 3.15 (2.49,3.99) | 2,043  | 9.00 (8.62,9.40)                 | 3.03 (2.51,3.66) | 1,469 | 6.39 (6.06,6.72)                 | 2.15 (1.73,2.67) |
| Myocardial infarction               | 239            | 1.01 (0.88,1.14)                 | 1,672  | 7.28 (6.93,7.63)                 | 7.17 (5.54,9.29)       | 1,336  | 5.73 (5.43,6.05)                 | 5.68 (4.16,7.75) | 874    | 3.71 (3.47,3.96)                 | 3.69 (2.74,4.95) | 868   | 3.64 (3.40,3.89)                 | 3.62 (2.76,4.75) |
| Heart Failure                       | 247            | 1.05 (0.92,1.18)                 | 1,177  | 5.16 (4.88,5.47)                 | 4.92 (3.68,6.57)       | 803    | 3.46 (3.23,3.71)                 | 3.30 (2.29,4.76) | 530    | 2.26 (2.08,2.46)                 | 2.16 (1.53,3.05) | 323   | 1.36 (1.22,1.51)                 | 1.30 (0.85,1.98) |
| Atrial fibrillation                 | 135            | 0.58 (0.49,0.68)                 | 597    | 2.64 (2.43,2.86)                 | 4.56 (3.03,6.87)       | 512    | 2.23 (2.04,2.42)                 | 3.86 (2.44,6.10) | 351    | 1.51 (1.36,1.67)                 | 2.61 (1.68,4.05) | 407   | 1.72 (1.56,1.90)                 | 2.99 (2.04,4.38) |
| Coronary Artery Disease             | 385            | 1.68 (1.52,1.86)                 | 1,842  | 8.27 (7.90,8.65)                 | 4.89 (3.84,6.21)       | 1,427  | 6.33 (6.01,6.67)                 | 3.76 (2.82,5.01) | 1,118  | 4.93 (4.64,5.22)                 | 2.93 (2.27,3.77) | 992   | 4.33 (4.07,4.61)                 | 2.58 (2.03,3.27) |
| Deep vein thrombosis                | 38             | 0.16 (0.12,0.22)                 | 238    | 1.03 (0.91,1.17)                 | (3.10,13.15)           | 238    | 1.01 (0.89,1.15)                 | (2.94,13.46)     | 70     | 0.30 (0.23,0.37)                 | 1.85 (0.71,4.81) | 62    | 0.26 (0.20,0.33)                 | 1.60 (0.63,4.04) |
| Cardiovascular mortality            | 1,025          | 4.28 (4.03,4.55)                 | 5,641  | 24.32<br>(23.69,24.96)           | 5.65 (4.92,6.48)       | 3,003  | 12.77<br>(12.32,13.24)           | 2.97 (2.47,3.58) | 1,894  | 7.98 (7.63,8.35)                 | 1.86 (1.54,2.25) | 1,024 | 4.26 (4.00,4.52)                 | 0.99 (0.75,1.32) |
| Chronic pulmonary disease           | 87             | 0.37 (0.30,0.45)                 | 320    | 1.42 (1.27,1.58)                 | 3.82 (2.21,6.61)       | 554    | 2.42 (2.22,2.63)                 | (3.90,10.92)     | 354    | 1.53 (1.38,1.70)                 | 4.13 (2.55,6.70) | 200   | 0.85 (0.74,0.97)                 | 2.30 (1.41,3.74) |
| Acute respiratory distress syndrome | 160            | 0.67 (0.58,0.79)                 | 1,155  | 5.03 (4.74,5.32)                 | (5.30,10.37)           | 630    | 2.70 (2.49,2.91)                 | 3.99 (2.62,6.09) | 445    | 1.89 (1.72,2.07)                 | 2.80 (1.90,4.13) | 340   | 1.42 (1.28,1.58)                 | 2.11 (1.41,3.16) |
| Seizure                             | 75             | 0.32 (0.25,0.40)                 | 586    | 2.57 (2.36,2.78)                 | (5.04,12.94)           | 441    | 1.89 (1.72,2.08)                 | (3.36,10.65)     | 241    | 1.02 (0.90,1.16)                 | 3.24 (1.90,5.54) | 242   | 1.01 (0.89,1.15)                 | 3.21 (1.55,6.61) |
| End-stage renal disease             | 38             | 0.16 (0.11,0.21)                 | 217    | 0.94 (0.82,1.07)                 | (2.11,16.37)           | 39     | 0.16 (0.12,0.22)                 | 1.03 (0.17,6.11) | 67     | 0.28 (0.22,0.36)                 | 1.78 (0.55,5.83) | 83    | 0.34 (0.28,0.42)                 | 2.18 (0.51,9.24) |
| Acute kidney injury                 | 74             | 0.31 (0.25,0.39)                 | 721    | 3.14 (2.92,3.37)                 | (6.55,15.33)           | 670    | 2.87 (2.66,3.09)                 | (5.72,14.72)     | 301    | 1.28 (1.14,1.43)                 | 4.09 (2.48,6.74) | 357   | 1.49 (1.34,1.65)                 | 4.78 (2.93,7.80) |
| Pancreatitis                        | 51             | 0.21 (0.16,0.28)                 | 229    | 0.99 (0.87,1.13)                 | 4.62 (2.29,9.32)       | 111    | 0.47 (0.39,0.57)                 | 2.20 (0.73,6.65) | 116    | 0.49 (0.41,0.59)                 | 2.29 (1.08,4.88) | 87    | 0.36 (0.29,0.44)                 | 1.68 (0.82,3.46) |
| All-cause mortality                 | 4,989          | 20.84<br>(20.27,21.43)           | 90,249 | 389.18<br>(386.64,391.72)        | 18.59<br>(17.73,19.50) | 42,585 | 181.10<br>(179.39,182.83)        | 8.67 (8.17,9.21) | 19,044 | 80.22<br>(79.09,81.37)           | 3.85 (3.59,4.11) | 9,002 | 37.41<br>(36.65,38.19)           | 1.79 (1.53,2.10) |

Note: CI: confidence interval, REF: Reference group; Major CVD: Major Cardiovascular Disease; Composite outcome of stroke, heart failure and coronary artery disease

Hazard Ratio (HR) and 95% Confidence Interval (95% CI) were estimated by Cox regression, HR >1 (or <1) indicates patients with COVID-19 had higher (lower) risk of sequelae compared to the non-COVID-19 control cohort

Un-vaccinated, Incomplete vaccinated, Fully Vaccinated and Received booster dose of COVID-19 vaccines refers to patients who have received 0 dose, 1 doses, 2 doses and ≥3 doses of BioNtech or CoronaVac COVID-19 vaccines, respectively

**Supplementary Table 9. Incidence rate and hazard ratio of clinical sequelae in COVID-19 and non-COVID-19 cohort after weighting during 0-30, 31-90, 91-180, 181-270,271-365 days of SARS-CoV-2 infection (Excluding patients with incident SARS-CoV-2 infection over 6 months after the last dose of COVID-19 vaccination; continued)**

**31-90 days**

| Clinical sequelae                   | Controls (REF) |                                  |        | COVID-19            |                                  |              |                         |                                  |              |                     |                                  |              |                       |                                  |              |
|-------------------------------------|----------------|----------------------------------|--------|---------------------|----------------------------------|--------------|-------------------------|----------------------------------|--------------|---------------------|----------------------------------|--------------|-----------------------|----------------------------------|--------------|
|                                     | Event          | Incidence per 1,000 person-years | Event  | Unvaccinated        |                                  |              | Incompletely vaccinated |                                  |              | Fully vaccinated    |                                  |              | Received booster dose |                                  |              |
|                                     |                |                                  |        | Event               | Incidence per 1,000 person-years | Hazard ratio | Event                   | Incidence per 1,000 person-years | Hazard ratio | Event               | Incidence per 1,000 person-years | Hazard ratio | Event                 | Incidence per 1,000 person-years | Hazard ratio |
| Major CVD                           | 2,542          | 5.95 (5.72,6.18)                 | 4,954  | 12.12               | 2.04 (1.77,2.35)                 | 3,665        | 8.75 (8.47,9.04)        | 1.47 (1.24,1.75)                 | 2,701        | 6.38 (6.14,6.62)    | 1.07 (0.93,1.24)                 | 2,865        | 6.72 (6.48,6.97)      | 1.13 (0.99,1.29)                 |              |
| Stroke                              | 1,453          | 3.24 (3.08,3.41)                 | 2,454  | 5.73 (5.50,5.96)    | 1.77 (1.45,2.16)                 | 1,991        | 4.54 (4.34,4.74)        | 1.40 (1.11,1.77)                 | 1,418        | 3.19 (3.03,3.36)    | 0.98 (0.81,1.20)                 | 1,394        | 3.10 (2.94,3.27)      | 0.96 (0.78,1.18)                 |              |
| Myocardial infarction               | 573            | 1.23 (1.14,1.34)                 | 1,027  | 2.28 (2.14,2.42)    | 1.84 (1.39,2.45)                 | 562          | 1.23 (1.13,1.33)        | 1.00 (0.64,1.55)                 | 580          | 1.26 (1.16,1.37)    | 1.02 (0.75,1.39)                 | 584          | 1.26 (1.16,1.36)      | 1.02 (0.76,1.36)                 |              |
| Heart Failure                       | 643            | 1.39 (1.29,1.50)                 | 2,039  | 4.56 (4.36,4.76)    | 3.28 (2.65,4.05)                 | 1,118        | 2.46 (2.31,2.60)        | 1.77 (1.33,2.35)                 | 889          | 1.94 (1.82,2.07)    | 1.39 (1.08,1.81)                 | 889          | 1.92 (1.80,2.05)      | 1.38 (1.05,1.82)                 |              |
| Atrial fibrillation                 | 415            | 0.90 (0.82,0.99)                 | 977    | 2.20 (2.07,2.34)    | 2.44 (1.81,3.30)                 | 619          | 1.37 (1.27,1.48)        | 1.52 (1.02,2.26)                 | 596          | 1.31 (1.21,1.42)    | 1.45 (1.06,1.98)                 | 401          | 0.87 (0.79,0.96)      | 0.97 (0.67,1.38)                 |              |
| Coronary Artery Disease             | 989            | 2.21 (2.08,2.35)                 | 1,976  | 4.52 (4.33,4.73)    | 2.05 (1.65,2.54)                 | 1,243        | 2.81 (2.66,2.97)        | 1.27 (0.95,1.71)                 | 1,070        | 2.41 (2.27,2.56)    | 1.09 (0.87,1.37)                 | 1,236        | 2.77 (2.62,2.93)      | 1.25 (1.03,1.52)                 |              |
| Deep vein thrombosis                | 97             | 0.21 (0.17,0.25)                 | 370    | 0.81 (0.73,0.90)    | 3.91 (2.28,6.72)                 | 197          | 0.43 (0.37,0.49)        | 2.05 (1.04,4.05)                 | 204          | 0.44 (0.38,0.50)    | 2.12 (1.23,3.64)                 | 86           | 0.18 (0.15,0.23)      | 0.89 (0.44,1.78)                 |              |
| Cardiovascular mortality            | 1,225          | 2.62 (2.47,2.77)                 | 2,346  | 5.15 (4.95,5.37)    | 1.97 (1.62,2.39)                 | 1,416        | 3.07 (2.91,3.23)        | 1.17 (0.91,1.51)                 | 1,097        | 2.36 (2.23,2.51)    | 0.90 (0.71,1.14)                 | 686          | 1.46 (1.36,1.57)      | 0.56 (0.41,0.77)                 |              |
| Chronic pulmonary disease           | 258            | 0.56 (0.50,0.63)                 | 737    | 1.67 (1.55,1.79)    | 2.96 (2.05,4.28)                 | 471          | 1.05 (0.96,1.14)        | 1.86 (1.12,3.09)                 | 394          | 0.87 (0.79,0.96)    | 1.55 (1.05,2.29)                 | 219          | 0.48 (0.42,0.55)      | 0.85 (0.55,1.33)                 |              |
| Acute respiratory distress syndrome | 452            | 0.97 (0.89,1.06)                 | 791    | 1.75 (1.64,1.88)    | 1.81 (1.27,2.56)                 | 742          | 1.62 (1.51,1.74)        | 1.67 (1.13,2.46)                 | 494          | 1.07 (0.98,1.17)    | 1.10 (0.79,1.54)                 | 623          | 1.34 (1.24,1.45)      | 1.38 (0.98,1.93)                 |              |
| Seizure                             | 235            | 0.50 (0.44,0.57)                 | 558    | 1.25 (1.15,1.35)    | 2.47 (1.59,3.84)                 | 414          | 0.91 (0.82,1.00)        | 1.80 (1.03,3.13)                 | 349          | 0.76 (0.68,0.84)    | 1.50 (0.99,2.28)                 | 152          | 0.33 (0.28,0.38)      | 0.65 (0.35,1.20)                 |              |
| End-stage renal disease             | 51             | 0.11 (0.08,0.14)                 | 81     | 0.18 (0.14,0.22)    | 1.63 (0.62,4.25)                 | 117          | 0.25 (0.21,0.30)        | 2.34 (0.88,6.19)                 | 52           | 0.11 (0.09,0.15)    | 1.03 (0.38,2.77)                 | 20           | 0.04 (0.03,0.06)      | 0.39 (0.12,1.28)                 |              |
| Acute kidney injury                 | 185            | 0.40 (0.34,0.46)                 | 670    | 1.49 (1.38,1.60)    | 3.74 (2.53,5.54)                 | 432          | 0.94 (0.86,1.04)        | 2.38 (1.43,3.95)                 | 214          | 0.46 (0.40,0.53)    | 1.17 (0.70,1.95)                 | 247          | 0.53 (0.47,0.60)      | 1.33 (0.79,2.25)                 |              |
| Pancreatitis                        | 108            | 0.23 (0.19,0.28)                 | 378    | 0.83 (0.75,0.92)    | 3.60 (2.05,6.32)                 | 216          | 0.47 (0.41,0.54)        | 2.03 (1.01,4.09)                 | 171          | 0.37 (0.32,0.43)    | 1.59 (0.87,2.92)                 | 144          | 0.31 (0.26,0.36)      | 1.33 (0.78,2.28)                 |              |
| All-cause mortality                 | 7,042          | 15.05 (14.70,15.40)              | 25,779 | 56.64 (55.95,57.34) | 3.76 (3.53,4.00)                 | 11,942       | 25.88 (25.42,26.34)     | 1.72 (1.57,1.88)                 | 7,513        | 16.18 (15.81,16.54) | 1.07 (0.98,1.18)                 | 6,171        | 13.16 (12.83,13.49)   | 0.87 (0.76,1.00)                 |              |

Note: CI: confidence interval, REF: Reference group; Major CVD: Major Cardiovascular Disease; Composite outcome of stroke, heart failure and coronary artery disease

Hazard Ratio (HR) and 95% Confidence Interval (95% CI) were estimated by Cox regression. HR >1 (or <1) indicates patients with COVID-19 had higher (lower) risk of sequelae compared to the non-COVID-19 control cohort

Un-vaccinated, Incomplete vaccinated, Fully Vaccinated and Received booster dose of COVID-19 vaccines refers to patients who have received 0 dose, 1 doses, 2 doses and ≥3 doses of BioNtech or CoronaVac COVID-19 vaccines, respectively

**Supplementary Table 9. Incidence rate and hazard ratio of clinical sequelae in COVID-19 and non-COVID-19 cohort after weighting during 0-30, 31-90, 91-180, 181-270,271-365 days of SARS-CoV-2 infection (Excluding patients with incident SARS-CoV-2 infection over 6 months after the last dose of COVID-19 vaccination; continued)**

**91-180 days**

| Clinical sequelae                   | Controls (REF) |                                  |        | COVID-19            |                                  |              |                         |                                  |              |                     |                                  |              |                       |                                  |
|-------------------------------------|----------------|----------------------------------|--------|---------------------|----------------------------------|--------------|-------------------------|----------------------------------|--------------|---------------------|----------------------------------|--------------|-----------------------|----------------------------------|
|                                     | Event          | Incidence per 1,000 person-years | Event  | Unvaccinated        |                                  |              | Incompletely vaccinated |                                  |              | Fully vaccinated    |                                  |              | Received booster dose |                                  |
|                                     |                |                                  |        | Event               | Incidence per 1,000 person-years | Hazard ratio | Event                   | Incidence per 1,000 person-years | Hazard ratio | Event               | Incidence per 1,000 person-years | Hazard ratio | Event                 | Incidence per 1,000 person-years |
| Major CVD                           | 3,549          | 6.26 (6.05,6.47)                 | 5,416  | 9.43 (9.19,9.69)    | 1.51 (1.32,1.74)                 | 4,774        | 7.76 (7.55,7.99)        | 1.25 (1.07,1.45)                 | 4,025        | 6.70 (6.49,6.91)    | 1.07 (0.95,1.21)                 | 2,881        | 5.59 (5.39,5.80)      | 0.89 (0.79,1.00)                 |
| Stroke                              | 2,067          | 3.47 (3.33,3.63)                 | 2,728  | 4.53 (4.36,4.70)    | 1.31 (1.08,1.58)                 | 2,657        | 4.12 (3.97,4.28)        | 1.19 (0.97,1.47)                 | 2,238        | 3.55 (3.41,3.70)    | 1.02 (0.87,1.20)                 | 1,422        | 2.64 (2.50,2.78)      | 0.76 (0.64,0.89)                 |
| Myocardial infarction               | 781            | 1.27 (1.18,1.36)                 | 1,275  | 2.01 (1.90,2.12)    | 1.58 (1.19,2.11)                 | 982          | 1.46 (1.37,1.55)        | 1.15 (0.83,1.59)                 | 767          | 1.17 (1.09,1.26)    | 0.93 (0.70,1.22)                 | 801          | 1.44 (1.34,1.54)      | 1.14 (0.89,1.46)                 |
| Heart Failure                       | 744            | 1.21 (1.13,1.30)                 | 1,865  | 2.96 (2.83,3.10)    | 2.45 (1.97,3.06)                 | 1,332        | 1.99 (1.89,2.10)        | 1.66 (1.25,2.19)                 | 1,165        | 1.79 (1.69,1.90)    | 1.49 (1.19,1.86)                 | 694          | 1.25 (1.16,1.35)      | 1.03 (0.78,1.35)                 |
| Atrial fibrillation                 | 614            | 1.01 (0.93,1.09)                 | 927    | 1.48 (1.39,1.58)    | 1.47 (1.07,2.02)                 | 876          | 1.32 (1.24,1.41)        | 1.31 (0.94,1.81)                 | 870          | 1.35 (1.26,1.44)    | 1.33 (1.03,1.72)                 | 723          | 1.31 (1.22,1.41)      | 1.31 (0.87,1.96)                 |
| Coronary Artery Disease             | 1,423          | 2.39 (2.27,2.52)                 | 2,237  | 3.64 (3.49,3.79)    | 1.52 (1.23,1.88)                 | 1,947        | 3.00 (2.87,3.13)        | 1.25 (1.00,1.57)                 | 1,543        | 2.45 (2.33,2.57)    | 1.02 (0.85,1.24)                 | 1,317        | 2.46 (2.33,2.59)      | 1.02 (0.85,1.23)                 |
| Deep vein thrombosis                | 133            | 0.22 (0.18,0.25)                 | 231    | 0.36 (0.32,0.41)    | 1.68 (0.88,3.20)                 | 279          | 0.41 (0.37,0.46)        | 1.91 (0.98,3.73)                 | 93           | 0.14 (0.11,0.17)    | 0.65 (0.31,1.37)                 | 120          | 0.21 (0.18,0.25)      | 1.00 (0.40,2.48)                 |
| Cardiovascular mortality            | 1,419          | 2.28 (2.17,2.40)                 | 2,551  | 3.98 (3.82,4.13)    | 1.74 (1.44,2.10)                 | 1,480        | 2.18 (2.07,2.30)        | 0.95 (0.74,1.23)                 | 1,052        | 1.60 (1.50,1.70)    | 0.70 (0.55,0.88)                 | 387          | 0.69 (0.63,0.76)      | 0.30 (0.21,0.45)                 |
| Chronic pulmonary disease           | 375            | 0.62 (0.56,0.68)                 | 791    | 1.27 (1.18,1.36)    | 2.07 (1.43,3.00)                 | 683          | 1.03 (0.96,1.11)        | 1.70 (1.11,2.59)                 | 515          | 0.80 (0.73,0.87)    | 1.31 (0.94,1.82)                 | 371          | 0.68 (0.61,0.75)      | 1.09 (0.72,1.65)                 |
| Acute respiratory distress syndrome | 626            | 1.01 (0.94,1.09)                 | 1,200  | 1.89 (1.78,2.00)    | 1.87 (1.39,2.50)                 | 840          | 1.25 (1.17,1.33)        | 1.23 (0.86,1.77)                 | 923          | 1.41 (1.32,1.50)    | 1.39 (1.08,1.79)                 | 550          | 0.99 (0.91,1.07)      | 0.98 (0.68,1.40)                 |
| Seizure                             | 319            | 0.52 (0.46,0.58)                 | 844    | 1.34 (1.25,1.43)    | 2.61 (1.82,3.74)                 | 738          | 1.10 (1.02,1.18)        | 2.16 (1.44,3.25)                 | 341          | 0.52 (0.47,0.58)    | 1.02 (0.68,1.52)                 | 279          | 0.50 (0.44,0.56)      | 0.95 (0.50,1.81)                 |
| End-stage renal disease             | 71             | 0.11 (0.09,0.14)                 | 109    | 0.17 (0.14,0.21)    | 1.49 (0.56,3.99)                 | 147          | 0.22 (0.18,0.26)        | 1.92 (0.75,4.93)                 | 17           | 0.03 (0.02,0.04)    | 0.22 (0.05,0.93)                 | 0            | NA                    | NA                               |
| Acute kidney injury                 | 314            | 0.51 (0.45,0.57)                 | 567    | 0.89 (0.82,0.97)    | 1.76 (1.17,2.65)                 | 448          | 0.66 (0.61,0.73)        | 1.32 (0.84,2.06)                 | 390          | 0.60 (0.54,0.66)    | 1.18 (0.81,1.71)                 | 110          | 0.20 (0.16,0.24)      | 0.39 (0.20,0.73)                 |
| Pancreatitis                        | 150            | 0.24 (0.21,0.28)                 | 173    | 0.27 (0.23,0.31)    | 1.12 (0.55,2.27)                 | 154          | 0.23 (0.19,0.26)        | 0.94 (0.39,2.24)                 | 174          | 0.26 (0.23,0.31)    | 1.09 (0.61,1.97)                 | 86           | 0.15 (0.12,0.19)      | 0.63 (0.31,1.28)                 |
| All-cause mortality                 | 9,122          | 14.68 (14.38,14.98)              | 19,759 | 30.81 (30.38,31.24) | 2.10 (1.96,2.25)                 | 11,570       | 17.06 (16.76,17.38)     | 1.16 (1.06,1.28)                 | 7,633        | 11.59 (11.33,11.85) | 0.79 (0.72,0.86)                 | 5,185        | 9.26 (9.01,9.51)      | 0.63 (0.55,0.72)                 |

Note: CI: confidence interval, REF: Reference group; Major CVD: Major Cardiovascular Disease; Composite outcome of stroke, heart failure and coronary artery disease

Hazard Ratio (HR) and 95% Confidence Interval (95% CI) were estimated by Cox regression, HR >1 (or <1) indicates patients with COVID-19 had higher (lower) risk of sequelae compared to the non-COVID-19 control cohort

Un-vaccinated, Incomplete vaccinated, Fully Vaccinated and Received booster dose of COVID-19 vaccines refers to patients who have received 0 dose, 1 doses, 2 doses and ≥3 doses of BioNtech or CoronaVac COVID-19 vaccines, respectively

**Supplementary Table 9. Incidence rate and hazard ratio of clinical sequelae in COVID-19 and non-COVID-19 cohort after weighting during 0-30, 31-90, 91-180, 181-270,271-365 days of SARS-CoV-2 infection (Excluding patients with incident SARS-CoV-2 infection over 6 months after the last dose of COVID-19 vaccination; continued)**

**181-270 days**

| Clinical sequelae                   | Controls (REF) |                                  |        | COVID-19            |                                  |              |                         |                                  |              |                  |                                  |              |                       |                                  |
|-------------------------------------|----------------|----------------------------------|--------|---------------------|----------------------------------|--------------|-------------------------|----------------------------------|--------------|------------------|----------------------------------|--------------|-----------------------|----------------------------------|
|                                     | Event          | Incidence per 1,000 person-years | Event  | Unvaccinated        |                                  |              | Incompletely vaccinated |                                  |              | Fully vaccinated |                                  |              | Received booster dose |                                  |
|                                     |                |                                  |        | Event               | Incidence per 1,000 person-years | Hazard ratio | Event                   | Incidence per 1,000 person-years | Hazard ratio | Event            | Incidence per 1,000 person-years | Hazard ratio | Event                 | Incidence per 1,000 person-years |
| Major CVD                           | 2,959          | 6.69 (6.45,6.93)                 | 4,413  | 9.85 (9.57,10.15)   | 1.47 (1.27,1.71)                 | 4,113        | 8.76 (8.50,9.04)        | 1.31 (1.12,1.53)                 | 3,193        | 7.01 (6.77,7.26) | 1.05 (0.92,1.19)                 | 2,138        | 5.23 (5.02,5.46)      | 0.78 (0.66,0.93)                 |
| Stroke                              | 1,660          | 3.57 (3.40,3.74)                 | 2,517  | 5.35 (5.14,5.56)    | 1.50 (1.23,1.82)                 | 2,004        | 4.07 (3.89,4.25)        | 1.14 (0.92,1.42)                 | 1,774        | 3.71 (3.54,3.89) | 1.04 (0.88,1.23)                 | 1,113        | 2.58 (2.43,2.73)      | 0.72 (0.57,0.91)                 |
| Myocardial infarction               | 695            | 1.44 (1.34,1.55)                 | 815    | 1.64 (1.53,1.76)    | 1.13 (0.83,1.54)                 | 1,067        | 2.08 (1.95,2.20)        | 1.43 (1.07,1.92)                 | 584          | 1.18 (1.09,1.28) | 0.82 (0.61,1.09)                 | 1,379        | 3.08 (2.92,3.25)      | 2.16 (0.62,7.45)                 |
| Heart Failure                       | 722            | 1.50 (1.40,1.62)                 | 1,791  | 3.64 (3.47,3.81)    | 2.42 (1.94,3.02)                 | 1,369        | 2.68 (2.54,2.82)        | 1.78 (1.38,2.30)                 | 754          | 1.53 (1.42,1.64) | 1.02 (0.78,1.32)                 | 648          | 1.45 (1.34,1.56)      | 0.96 (0.46,2.00)                 |
| Atrial fibrillation                 | 503            | 1.05 (0.96,1.15)                 | 888    | 1.82 (1.70,1.94)    | 1.73 (1.27,2.36)                 | 664          | 1.31 (1.21,1.41)        | 1.25 (0.86,1.81)                 | 842          | 1.72 (1.60,1.84) | 1.63 (1.27,2.11)                 | 340          | 0.77 (0.69,0.85)      | 0.72 (0.46,1.14)                 |
| Coronary Artery Disease             | 1,222          | 2.63 (2.49,2.78)                 | 1,501  | 3.12 (2.97,3.28)    | 1.19 (0.94,1.50)                 | 1,732        | 3.49 (3.33,3.66)        | 1.33 (1.05,1.67)                 | 1,307        | 2.74 (2.59,2.89) | 1.04 (0.86,1.26)                 | 926          | 2.16 (2.02,2.30)      | 0.82 (0.64,1.05)                 |
| Deep vein thrombosis                | 93             | 0.19 (0.16,0.23)                 | 115    | 0.23 (0.19,0.28)    | 1.20 (0.59,2.43)                 | 83           | 0.16 (0.13,0.20)        | 0.84 (0.34,2.04)                 | 122          | 0.24 (0.21,0.29) | 1.28 (0.67,2.43)                 | 41           | 0.09 (0.07,0.12)      | 0.47 (0.16,1.33)                 |
| Cardiovascular mortality            | 907            | 1.87 (1.75,1.99)                 | 1,660  | 3.31 (3.16,3.47)    | 1.78 (1.43,2.21)                 | 1,069        | 2.06 (1.94,2.19)        | 1.11 (0.84,1.46)                 | 526          | 1.05 (0.97,1.15) | 0.57 (0.41,0.77)                 | 444          | 0.98 (0.89,1.08)      | 0.52 (0.29,0.92)                 |
| Chronic pulmonary disease           | 299            | 0.63 (0.56,0.70)                 | 728    | 1.49 (1.39,1.61)    | 2.38 (1.66,3.42)                 | 561          | 1.11 (1.02,1.21)        | 1.77 (1.18,2.66)                 | 400          | 0.82 (0.74,0.90) | 1.31 (0.90,1.89)                 | 160          | 0.36 (0.31,0.42)      | 0.58 (0.35,0.97)                 |
| Acute respiratory distress syndrome | 481            | 0.99 (0.91,1.09)                 | 753    | 1.51 (1.41,1.63)    | 1.52 (1.07,2.16)                 | 468          | 0.91 (0.83,0.99)        | 0.91 (0.60,1.39)                 | 503          | 1.01 (0.93,1.11) | 1.02 (0.74,1.39)                 | 405          | 0.90 (0.82,1.00)      | 0.92 (0.40,2.13)                 |
| Seizure                             | 272            | 0.56 (0.50,0.63)                 | 822    | 1.67 (1.55,1.78)    | 2.96 (2.08,4.21)                 | 578          | 1.13 (1.04,1.22)        | 2.00 (1.32,3.05)                 | 238          | 0.48 (0.42,0.54) | 0.85 (0.54,1.35)                 | 185          | 0.41 (0.35,0.47)      | 0.73 (0.23,2.35)                 |
| End-stage renal disease             | 46             | 0.09 (0.07,0.12)                 | 85     | 0.17 (0.14,0.21)    | 1.80 (0.72,4.46)                 | 98           | 0.19 (0.16,0.23)        | 2.00 (0.89,4.49)                 | 101          | 0.20 (0.16,0.24) | 2.13 (1.00,4.53)                 | 0            | NA                    | NA                               |
| Acute kidney injury                 | 271            | 0.56 (0.50,0.63)                 | 428    | 0.86 (0.78,0.94)    | 1.54 (1.02,2.33)                 | 323          | 0.63 (0.56,0.70)        | 1.12 (0.67,1.87)                 | 252          | 0.51 (0.45,0.57) | 0.90 (0.56,1.45)                 | 90           | 0.20 (0.16,0.24)      | 0.35 (0.16,0.78)                 |
| Pancreatitis                        | 144            | 0.30 (0.25,0.35)                 | 250    | 0.50 (0.44,0.57)    | 1.69 (0.93,3.07)                 | 133          | 0.26 (0.22,0.30)        | 0.87 (0.36,2.06)                 | 118          | 0.24 (0.20,0.28) | 0.80 (0.42,1.52)                 | 70           | 0.15 (0.12,0.19)      | 0.51 (0.23,1.17)                 |
| All-cause mortality                 | 7,415          | 15.25 (14.90,15.60)              | 15,111 | 30.14 (29.66,30.62) | 1.98 (1.83,2.13)                 | 8,955        | 17.27 (16.92,17.63)     | 1.13 (1.03,1.25)                 | 4,781        | 9.58 (9.31,9.85) | 0.63 (0.57,0.70)                 | 8,017        | 17.69 (17.31,18.08)   | 1.16 (0.77,1.73)                 |

Note: CI: confidence interval, REF: Reference group; Major CVD: Major Cardiovascular Disease; Composite outcome of stroke, heart failure and coronary artery disease

Hazard Ratio (HR) and 95% Confidence Interval (95% CI) were estimated by Cox regression, HR >1 (or <1) indicates patients with COVID-19 had higher (lower) risk of sequelae compared to the non-COVID-19 control cohort

Un-vaccinated, Incomplete vaccinated, Fully Vaccinated and Received booster dose of COVID-19 vaccines refers to patients who have received 0 dose, 1 doses, 2 doses and ≥3 doses of BioNtech or CoronaVac COVID-19 vaccines, respectively

**Supplementary Table 9. Incidence rate and hazard ratio of clinical sequelae in COVID-19 and non-COVID-19 cohort after weighting during 0-30, 31-90, 91-180, 181-270,271-365 days of SARS-CoV-2 infection (Excluding patients with incident SARS-CoV-2 infection over 6 months after the last dose of COVID-19 vaccination; continued)**

271-365 days

| Clinical sequelae                   | Controls (REF) |                                  |       | COVID-19            |                                  |              |                         |                                  |              |                     |                                  |              |                       |                                  |
|-------------------------------------|----------------|----------------------------------|-------|---------------------|----------------------------------|--------------|-------------------------|----------------------------------|--------------|---------------------|----------------------------------|--------------|-----------------------|----------------------------------|
|                                     | Event          | Incidence per 1,000 person-years | Event | Unvaccinated        |                                  |              | Incompletely vaccinated |                                  |              | Fully vaccinated    |                                  |              | Received booster dose |                                  |
|                                     |                |                                  |       | Event               | Incidence per 1,000 person-years | Hazard ratio | Event                   | Incidence per 1,000 person-years | Hazard ratio | Event               | Incidence per 1,000 person-years | Hazard ratio | Event                 | Incidence per 1,000 person-years |
| Major CVD                           | 1,779          | 7.01 (6.69,7.34)                 | 2,143 | 8.12 (7.78,8.47)    | 1.22 (1.00,1.50)                 | 1,962        | 8.06 (7.71,8.42)        | 1.14 (0.92,1.40)                 | 1,686        | 6.75 (6.44,7.08)    | 0.96 (0.81,1.14)                 | 1,584        | 6.14 (5.84,6.44)      | 0.86 (0.51,1.45)                 |
| Stroke                              | 930            | 3.49 (3.27,3.72)                 | 1,064 | 3.86 (3.63,4.09)    | 1.15 (0.86,1.53)                 | 772          | 3.02 (2.82,3.24)        | 0.86 (0.62,1.20)                 | 918          | 3.51 (3.29,3.74)    | 1.00 (0.79,1.27)                 | 1,089        | 3.93 (3.70,4.17)      | 1.11 (0.52,2.36)                 |
| Myocardial infarction               | 443            | 1.60 (1.46,1.76)                 | 426   | 1.47 (1.34,1.62)    | 0.98 (0.65,1.47)                 | 562          | 2.12 (1.95,2.30)        | 1.30 (0.88,1.92)                 | 397          | 1.47 (1.33,1.62)    | 0.91 (0.64,1.31)                 | 195          | 0.67 (0.58,0.77)      | 0.41 (0.26,0.66)                 |
| Heart Failure                       | 530            | 1.93 (1.77,2.10)                 | 1,024 | 3.56 (3.35,3.79)    | 1.98 (1.49,2.62)                 | 838          | 3.17 (2.96,3.39)        | 1.62 (1.20,2.19)                 | 628          | 2.33 (2.15,2.52)    | 1.20 (0.91,1.60)                 | 355          | 1.23 (1.10,1.36)      | 0.62 (0.28,1.40)                 |
| Atrial fibrillation                 | 275            | 1.01 (0.89,1.13)                 | 441   | 1.55 (1.41,1.69)    | 1.62 (1.04,2.52)                 | 369          | 1.41 (1.27,1.56)        | 1.39 (0.85,2.25)                 | 291          | 1.09 (0.97,1.22)    | 1.08 (0.70,1.65)                 | 815          | 2.84 (2.65,3.04)      | 2.78 (0.69,11.19)                |
| Coronary Artery Disease             | 732            | 2.75 (2.56,2.96)                 | 662   | 2.36 (2.18,2.54)    | 0.89 (0.63,1.25)                 | 849          | 3.31 (3.09,3.53)        | 1.19 (0.86,1.65)                 | 554          | 2.12 (1.95,2.31)    | 0.77 (0.57,1.03)                 | 540          | 1.97 (1.81,2.14)      | 0.71 (0.46,1.09)                 |
| Deep vein thrombosis                | 54             | 0.19 (0.15,0.25)                 | 127   | 0.44 (0.36,0.52)    | 2.42 (1.05,5.57)                 | 31           | 0.12 (0.08,0.16)        | 0.58 (0.14,2.42)                 | 22           | 0.08 (0.05,0.12)    | 0.41 (0.09,1.81)                 | 21           | 0.07 (0.04,0.11)      | 0.35 (0.08,1.50)                 |
| Cardiovascular mortality            | 94             | 0.34 (0.28,0.41)                 | 176   | 0.60 (0.52,0.70)    | 1.66 (0.81,3.40)                 | 52           | 0.19 (0.14,0.25)        | 0.59 (0.18,1.92)                 | 10           | 0.04 (0.02,0.07)    | 0.11 (0.02,0.82)                 | 0            | NA                    | NA                               |
| Chronic pulmonary disease           | 250            | 0.92 (0.81,1.04)                 | 334   | 1.17 (1.05,1.30)    | 1.36 (0.82,2.27)                 | 409          | 1.57 (1.42,1.72)        | 1.68 (1.04,2.73)                 | 319          | 1.20 (1.07,1.33)    | 1.30 (0.85,1.97)                 | 82           | 0.29 (0.23,0.35)      | 0.30 (0.15,0.61)                 |
| Acute respiratory distress syndrome | 243            | 0.88 (0.77,0.99)                 | 310   | 1.07 (0.95,1.19)    | 1.30 (0.76,2.22)                 | 433          | 1.62 (1.48,1.78)        | 1.82 (1.18,2.80)                 | 287          | 1.06 (0.94,1.18)    | 1.20 (0.77,1.85)                 | 567          | 1.96 (1.81,2.13)      | 2.18 (0.59,7.98)                 |
| Seizure                             | 136            | 0.49 (0.41,0.58)                 | 218   | 0.76 (0.66,0.86)    | 1.62 (0.89,2.95)                 | 240          | 0.90 (0.79,1.02)        | 1.82 (0.99,3.34)                 | 85           | 0.32 (0.25,0.39)    | 0.64 (0.33,1.24)                 | 114          | 0.39 (0.33,0.47)      | 0.79 (0.21,2.99)                 |
| End-stage renal disease             | 30             | 0.11 (0.08,0.15)                 | 143   | 0.49 (0.41,0.57)    | 4.91 (2.05,11.76)                | 56           | 0.21 (0.16,0.27)        | 1.90 (0.56,6.43)                 | 6            | 0.02 (0.01,0.04)    | 0.19 (0.02,1.38)                 | 50           | 0.17 (0.13,0.23)      | 1.52 (0.20,11.35)                |
| Acute kidney injury                 | 136            | 0.49 (0.42,0.58)                 | 177   | 0.61 (0.53,0.71)    | 1.33 (0.70,2.53)                 | 86           | 0.32 (0.26,0.40)        | 0.65 (0.26,1.62)                 | 93           | 0.34 (0.28,0.42)    | 0.69 (0.35,1.37)                 | 454          | 1.55 (1.42,1.70)      | 3.03 (0.52,17.83)                |
| Pancreatitis                        | 69             | 0.25 (0.19,0.31)                 | 161   | 0.55 (0.47,0.65)    | 2.39 (1.07,5.34)                 | 94           | 0.35 (0.28,0.43)        | 1.39 (0.51,3.81)                 | 22           | 0.08 (0.05,0.12)    | 0.32 (0.08,1.37)                 | 16           | 0.05 (0.03,0.08)      | 0.21 (0.03,1.53)                 |
| All-cause mortality                 | 4,226          | 15.20 (14.74,15.66)              | 9,154 | 31.36 (30.73,32.01) | 2.18 (1.98,2.41)                 | 4,048        | 15.11 (14.65,15.58)     | 0.98 (0.86,1.13)                 | 3,142        | 11.52 (11.12,11.93) | 0.75 (0.66,0.86)                 | 1,263        | 4.29 (4.06,4.54)      | 0.28 (0.18,0.43)                 |

Note: CI: confidence interval, REF: Reference group; Major CVD: Major Cardiovascular Disease; Composite outcome of stroke, heart failure and coronary artery disease

Hazard Ratio (HR) and 95% Confidence Interval (95% CI) were estimated by Cox regression. HR >1 (or <1) indicates patients with COVID-19 had higher (lower) risk of sequelae compared to the non-COVID-19 control cohort

Un-vaccinated, Incomplete vaccinated, Fully Vaccinated and Received booster dose of COVID-19 vaccines refers to patients who have received 0 dose, 1 doses, 2 doses and ≥3 doses of BioNtech or CoronaVac COVID-19 vaccines, respectively

**Supplementary Table 10. Incidence rate and hazard ratio of clinical sequelae in COVID-19 and non-COVID-19 cohort after weighting during 0-30, 31-90, 91-180, 181-270,271-365 days of SARS-CoV-2 infection (Adjusting for the likely variant of SARS-COV-2 responsible for the infection)**

**0-30 days**

| Clinical sequelae                   | Controls (REF) |                                  |        | COVID-19                         |                        |        |                                  |                      |        |                                  |                  |       |                                  |                  |
|-------------------------------------|----------------|----------------------------------|--------|----------------------------------|------------------------|--------|----------------------------------|----------------------|--------|----------------------------------|------------------|-------|----------------------------------|------------------|
|                                     | Event          | Incidence per 1,000 person-years | Event  | Unvaccinated                     |                        |        | Received single dose             |                      |        | Received two doses               |                  |       | Received booster dose(s)         |                  |
|                                     |                |                                  | Event  | Incidence per 1,000 person-years | Hazard ratio           | Event  | Incidence per 1,000 person-years | Hazard ratio         | Event  | Incidence per 1,000 person-years | Hazard ratio     | Event | Incidence per 1,000 person-years | Hazard ratio     |
| Major CVD                           | 1,317          | 4.38 (4.15,4.63)                 | 6,016  | 20.92<br>(20.40,21.46)           | 4.75 (4.08,5.52)       | 4,012  | 13.58<br>(13.17,14.01)           | 3.09 (2.57,3.72)     | 3,278  | 10.97<br>(10.60,11.35)           | 2.50 (2.19,2.86) | 2,594 | 8.69 (8.36,9.03)                 | 1.98 (1.72,2.29) |
| Stroke                              | 818            | 2.61 (2.44,2.80)                 | 3,590  | 12.00<br>(11.61,12.40)           | 4.56 (3.76,5.54)       | 2,422  | 7.88 (7.57,8.20)                 | 3.01 (2.38,3.80)     | 2,271  | 7.30 (7.00,7.60)                 | 2.79 (2.37,3.29) | 1,690 | 5.41 (5.16,5.68)                 | 2.07 (1.71,2.51) |
| Myocardial infarction               | 299            | 0.93 (0.83,1.04)                 | 1,960  | 6.28 (6.00,6.56)                 | 6.71 (5.21,8.65)       | 1,550  | 4.87 (4.63,5.12)                 | 5.23 (3.85,7.11)     | 974    | 3.04 (2.85,3.23)                 | 3.27 (2.52,4.24) | 919   | 2.86 (2.68,3.05)                 | 3.08 (2.39,3.97) |
| Heart Failure                       | 276            | 0.86 (0.76,0.97)                 | 1,392  | 4.49 (4.25,4.73)                 | 5.21 (3.87,7.01)       | 907    | 2.86 (2.68,3.05)                 | 3.33 (2.30,4.82)     | 639    | 2.00 (1.85,2.16)                 | 2.33 (1.70,3.18) | 352   | 1.10 (0.99,1.22)                 | 1.28 (0.86,1.89) |
| Atrial fibrillation                 | 155            | 0.48 (0.41,0.57)                 | 697    | 2.26 (2.10,2.44)                 | 4.65 (3.09,7.01)       | 594    | 1.89 (1.74,2.04)                 | 3.89 (2.48,6.08)     | 423    | 1.33 (1.21,1.46)                 | 2.74 (1.87,4.02) | 506   | 1.59 (1.45,1.73)                 | 3.27 (2.33,4.59) |
| Coronary Artery Disease             | 483            | 1.54 (1.41,1.69)                 | 2,181  | 7.18 (6.88,7.48)                 | 4.62 (3.64,5.86)       | 1,658  | 5.36 (5.11,5.62)                 | 3.46 (2.61,4.60)     | 1,258  | 4.04 (3.83,4.27)                 | 2.62 (2.10,3.26) | 1,091 | 3.51 (3.31,3.73)                 | 2.27 (1.83,2.83) |
| Deep vein thrombosis                | 41             | 0.13 (0.09,0.17)                 | 308    | 0.98 (0.87,1.09)                 | 7.71<br>(3.78,15.74)   | 271    | 0.85 (0.75,0.95)                 | 6.68<br>(3.15,14.17) | 109    | 0.34 (0.28,0.41)                 | 2.67 (1.24,5.75) | 71    | 0.22 (0.17,0.28)                 | 1.74 (0.77,3.94) |
| Cardiovascular mortality            | 1,103          | 3.39 (3.20,3.60)                 | 6,406  | 20.34<br>(19.85,20.85)           | 5.97 (5.20,6.85)       | 3,418  | 10.66<br>(10.31,11.02)           | 3.14 (2.60,3.77)     | 2,104  | 6.51 (6.24,6.79)                 | 1.92 (1.61,2.29) | 1,051 | 3.24 (3.05,3.44)                 | 0.96 (0.73,1.25) |
| Chronic pulmonary disease           | 115            | 0.36 (0.30,0.43)                 | 379    | 1.23 (1.11,1.36)                 | 3.42 (1.99,5.86)       | 682    | 2.18 (2.02,2.35)                 | 6.05<br>(3.62,10.12) | 397    | 1.25 (1.13,1.38)                 | 3.49 (2.32,5.24) | 232   | 0.73 (0.64,0.83)                 | 2.03 (1.31,3.17) |
| Acute respiratory distress syndrome | 189            | 0.58 (0.50,0.67)                 | 1,150  | 3.68 (3.47,3.90)                 | 6.28 (4.41,8.92)       | 710    | 2.23 (2.07,2.40)                 | 7.85<br>(2.51,5.77)  | 446    | 1.39 (1.26,1.52)                 | 2.37 (1.65,3.41) | 428   | 1.33 (1.21,1.46)                 | 2.28 (1.60,3.25) |
| Seizure                             | 105            | 0.32 (0.27,0.39)                 | 792    | 2.56 (2.38,2.74)                 | 7.85<br>(4.95,12.45)   | 568    | 1.79 (1.65,1.94)                 | 6.38<br>(3.11,9.79)  | 232    | 0.72 (0.63,0.82)                 | 2.22 (1.39,3.56) | 297   | 0.92 (0.82,1.03)                 | 2.84 (1.49,5.42) |
| End-stage renal disease             | 40             | 0.12 (0.09,0.16)                 | 246    | 0.78 (0.69,0.89)                 | 6.38<br>(2.83,14.40)   | 55     | 0.17 (0.13,0.22)                 | 9.51<br>(0.35,5.63)  | 93     | 0.29 (0.24,0.35)                 | 2.36 (0.96,5.82) | 86    | 0.27 (0.22,0.33)                 | 2.18 (0.59,8.01) |
| Acute kidney injury                 | 87             | 0.27 (0.22,0.33)                 | 841    | 2.69 (2.51,2.88)                 | 10.02<br>(6.63,15.14)  | 812    | 2.55 (2.38,2.73)                 | 9.51<br>(5.99,15.10) | 311    | 0.97 (0.86,1.08)                 | 3.62 (2.24,5.85) | 385   | 1.19 (1.08,1.31)                 | 4.45 (2.79,7.12) |
| Pancreatitis                        | 56             | 0.17 (0.13,0.22)                 | 247    | 0.79 (0.69,0.89)                 | 4.52 (2.18,9.35)       | 136    | 0.43 (0.36,0.50)                 | 2.45 (0.80,7.56)     | 145    | 0.45 (0.38,0.53)                 | 2.59 (1.37,4.88) | 132   | 0.41 (0.34,0.48)                 | 2.35 (1.31,4.23) |
| All-cause mortality                 | 5,456          | 16.79<br>(16.35,17.24)           | 101,84 | 323.47<br>(321.49,325.46)        | 19.20<br>(18.34,20.09) | 47,275 | 147.43<br>(146.10,148.76)        | 8.77 (8.27,9.29)     | 21,008 | 65.00<br>(64.13,65.89)           | 3.87 (3.64,4.12) | 9,358 | 28.86<br>(28.28,29.45)           | 1.72 (1.48,1.99) |

Note: CI: confidence interval, REF: Reference group; Major CVD: Major Cardiovascular Disease; Composite outcome of stroke, heart failure and coronary artery disease

Hazard Ratio (HR) and 95% Confidence Interval (95% CI) were estimated by Cox regression, HR >1 (or <1) indicates patients with COVID-19 had higher (lower) risk of sequelae compared to the non-COVID-19 control cohort

Un-vaccinated, Incomplete vaccinated, Fully Vaccinated and Received booster dose of COVID-19 vaccines refers to patients who have received 0 dose, 1 doses, 2 doses and ≥3 doses of BioNtech or CoronaVac COVID-19 vaccines, respectively

**Supplementary Table 10. Incidence rate and hazard ratio of clinical sequelae in COVID-19 and non-COVID-19 cohort after weighting during 0-30, 31-90, 91-180, 181-270,271-365 days of SARS-CoV-2 infection (Adjusting for the likely variant of SARS-COV-2 responsible for the infection, continued)**

| 31-90 days                          |       |                                  | COVID-19     |                                  |                  |                         |                                  |                  |                  |                                  |                  |                       |                                  |                  |
|-------------------------------------|-------|----------------------------------|--------------|----------------------------------|------------------|-------------------------|----------------------------------|------------------|------------------|----------------------------------|------------------|-----------------------|----------------------------------|------------------|
| Controls (REF)                      |       |                                  | Unvaccinated |                                  |                  | Incompletely vaccinated |                                  |                  | Fully vaccinated |                                  |                  | Received booster dose |                                  |                  |
| Clinical sequelae                   | Event | Incidence per 1,000 person-years | Event        | Incidence per 1,000 person-years | Hazard ratio     | Event                   | Incidence per 1,000 person-years | Hazard ratio     | Event            | Incidence per 1,000 person-years | Hazard ratio     | Event                 | Incidence per 1,000 person-years | Hazard ratio     |
| Major CVD                           | 3,127 | 5.31 (5.13,5.50)                 | 5,868        | 10.44 (10.18,10.71)              | 1.97 (1.70,2.27) | 4,369                   | 7.54 (7.32,7.76)                 | 1.42 (1.20,1.68) | 3,272            | 5.59 (5.40,5.78)                 | 1.05 (0.93,1.19) | 3,430                 | 5.88 (5.68,6.08)                 | 1.11 (0.98,1.25) |
| Stroke                              | 1,779 | 2.90 (2.77,3.04)                 | 2,901        | 4.95 (4.78,5.14)                 | 1.71 (1.39,2.10) | 2,385                   | 3.95 (3.80,4.12)                 | 1.36 (1.08,1.72) | 1,748            | 2.87 (2.73,3.00)                 | 0.99 (0.84,1.17) | 1,585                 | 2.60 (2.47,2.73)                 | 0.90 (0.75,1.08) |
| Myocardial infarction               | 695   | 1.10 (1.02,1.18)                 | 1,229        | 2.01 (1.90,2.12)                 | 1.82 (1.36,2.44) | 679                     | 1.09 (1.01,1.17)                 | 0.99 (0.64,1.53) | 711              | 1.13 (1.05,1.22)                 | 1.03 (0.80,1.33) | 696                   | 1.11 (1.03,1.19)                 | 1.01 (0.78,1.31) |
| Heart Failure                       | 727   | 1.15 (1.07,1.24)                 | 2,348        | 3.86 (3.71,4.02)                 | 3.35 (2.71,4.14) | 1,216                   | 1.96 (1.85,2.07)                 | 1.69 (1.27,2.25) | 1,022            | 1.63 (1.53,1.73)                 | 1.41 (1.12,1.79) | 977                   | 1.56 (1.46,1.66)                 | 1.35 (1.05,1.74) |
| Atrial fibrillation                 | 474   | 0.76 (0.69,0.83)                 | 1,132        | 1.87 (1.77,1.99)                 | 2.48 (1.82,3.37) | 702                     | 1.14 (1.05,1.22)                 | 1.50 (1.01,2.24) | 629              | 1.01 (0.93,1.09)                 | 1.34 (1.00,1.77) | 504                   | 0.81 (0.74,0.88)                 | 1.07 (0.79,1.46) |
| Coronary Artery Disease             | 1,230 | 2.01 (1.90,2.12)                 | 2,342        | 3.94 (3.78,4.10)                 | 1.96 (1.57,2.44) | 1,523                   | 2.51 (2.39,2.64)                 | 1.25 (0.93,1.67) | 1,334            | 2.19 (2.07,2.31)                 | 1.09 (0.90,1.31) | 1,594                 | 2.63 (2.50,2.76)                 | 1.31 (1.11,1.55) |
| Deep vein thrombosis                | 118   | 0.19 (0.15,0.22)                 | 457          | 0.74 (0.68,0.81)                 | 4.00 (2.33,6.87) | 220                     | 0.35 (0.31,0.40)                 | 1.88 (0.96,3.71) | 236              | 0.37 (0.33,0.42)                 | 2.01 (1.24,3.27) | 105                   | 0.17 (0.14,0.20)                 | 0.90 (0.48,1.68) |
| Cardiovascular mortality            | 1,327 | 2.09 (1.97,2.20)                 | 2,649        | 4.29 (4.13,4.46)                 | 2.06 (1.70,2.49) | 1,561                   | 2.48 (2.36,2.61)                 | 1.19 (0.92,1.53) | 1,247            | 1.97 (1.86,2.08)                 | 0.94 (0.76,1.17) | 690                   | 1.09 (1.01,1.17)                 | 0.52 (0.38,0.72) |
| Chronic pulmonary disease           | 309   | 0.49 (0.44,0.55)                 | 919          | 1.53 (1.43,1.63)                 | 3.09 (2.12,4.52) | 628                     | 1.02 (0.94,1.10)                 | 2.07 (1.25,3.42) | 383              | 0.62 (0.56,0.68)                 | 1.25 (0.87,1.79) | 274                   | 0.44 (0.39,0.50)                 | 0.90 (0.60,1.33) |
| Acute respiratory distress syndrome | 539   | 0.85 (0.78,0.93)                 | 911          | 1.49 (1.39,1.59)                 | 1.75 (1.21,2.52) | 886                     | 1.42 (1.33,1.51)                 | 1.66 (1.13,2.46) | 621              | 0.99 (0.91,1.07)                 | 1.16 (0.87,1.54) | 710                   | 1.13 (1.05,1.21)                 | 1.32 (0.97,1.81) |
| Seizure                             | 290   | 0.46 (0.41,0.51)                 | 751          | 1.24 (1.15,1.33)                 | 2.70 (1.74,4.20) | 533                     | 0.86 (0.79,0.93)                 | 1.87 (1.08,3.24) | 348              | 0.55 (0.50,0.61)                 | 1.21 (0.83,1.76) | 196                   | 0.31 (0.27,0.36)                 | 0.68 (0.40,1.15) |
| End-stage renal disease             | 62    | 0.10 (0.08,0.13)                 | 109          | 0.18 (0.15,0.21)                 | 1.81 (0.61,5.36) | 138                     | 0.22 (0.19,0.26)                 | 2.25 (0.86,5.91) | 62               | 0.10 (0.08,0.13)                 | 1.01 (0.42,2.46) | 21                    | 0.03 (0.02,0.05)                 | 0.34 (0.10,1.10) |
| Acute kidney injury                 | 203   | 0.32 (0.28,0.37)                 | 778          | 1.27 (1.18,1.36)                 | 3.95 (2.67,5.85) | 509                     | 0.81 (0.75,0.89)                 | 2.54 (1.53,4.20) | 250              | 0.40 (0.35,0.45)                 | 1.24 (0.77,1.99) | 257                   | 0.41 (0.36,0.46)                 | 1.27 (0.77,2.11) |
| Pancreatitis                        | 144   | 0.23 (0.19,0.27)                 | 486          | 0.79 (0.72,0.86)                 | 3.48 (1.96,6.18) | 263                     | 0.42 (0.37,0.47)                 | 1.85 (0.90,3.80) | 153              | 0.24 (0.21,0.28)                 | 1.07 (0.60,1.91) | 175                   | 0.28 (0.24,0.32)                 | 1.22 (0.75,1.98) |
| All-cause mortality                 | 7,772 | 12.21 (11.94,12.49)              | 28,976       | 46.97 (46.43,47.51)              | 3.84 (3.61,4.09) | 13,386                  | 21.28 (20.92,21.64)              | 1.74 (1.59,1.91) | 8,493            | 13.42 (13.14,13.71)              | 1.10 (1.01,1.20) | 6,698                 | 10.59 (10.34,10.85)              | 0.87 (0.76,0.99) |

Note: CI: confidence interval, REF: Reference group; Major CVD: Major Cardiovascular Disease; Composite outcome of stroke, heart failure and coronary artery disease

Hazard Ratio (HR) and 95% Confidence Interval (95% CI) were estimated by Cox regression, HR >1 (or <1) indicates patients with COVID-19 had higher (lower) risk of sequelae compared to the non-COVID-19 control cohort

Un-vaccinated, Incomplete vaccinated, Fully Vaccinated and Received booster dose of COVID-19 vaccines refers to patients who have received 0 dose, 1 doses, 2 doses and ≥3 doses of BioNtech or CoronaVac COVID-19 vaccines, respectively



**Supplementary Table 10. Incidence rate and hazard ratio of clinical sequelae in COVID-19 and non-COVID-19 cohort after weighting during 0-30, 31-90, 91-180, 181-270,271-365 days of SARS-CoV-2 infection (Adjusting for the likely variant of SARS-COV-2 responsible for the infection, continued)**

| 91-180 days                         |        |                                  | COVID-19     |                                  |                         |        |                                  |                  |                  |                                  |                  |                       |                                  |                  |
|-------------------------------------|--------|----------------------------------|--------------|----------------------------------|-------------------------|--------|----------------------------------|------------------|------------------|----------------------------------|------------------|-----------------------|----------------------------------|------------------|
| Controls (REF)                      |        |                                  | Unvaccinated |                                  | Incompletely vaccinated |        |                                  |                  | Fully vaccinated |                                  |                  | Received booster dose |                                  |                  |
| Clinical sequelae                   | Event  | Incidence per 1,000 person-years | Event        | Incidence per 1,000 person-years | Hazard ratio            | Event  | Incidence per 1,000 person-years | Hazard ratio     | Event            | Incidence per 1,000 person-years | Hazard ratio     | Event                 | Incidence per 1,000 person-years | Hazard ratio     |
| Major CVD                           | 4,244  | 5.59 (5.42,5.76)                 | 6,730        | 8.67 (8.47,8.88)                 | 1.56 (1.35,1.80)        | 5,782  | 6.85 (6.68,7.03)                 | 1.23 (1.06,1.44) | 4,678            | 5.59 (5.43,5.75)                 | 1.01 (0.91,1.11) | 3,201                 | 5.01 (4.84,5.19)                 | 0.89 (0.80,0.99) |
| Stroke                              | 2,472  | 3.12 (3.00,3.25)                 | 3,402        | 4.20 (4.06,4.34)                 | 1.35 (1.11,1.65)        | 3,176  | 3.62 (3.49,3.74)                 | 1.16 (0.95,1.43) | 2,620            | 3.01 (2.89,3.12)                 | 0.97 (0.84,1.11) | 1,551                 | 2.33 (2.22,2.45)                 | 0.74 (0.63,0.87) |
| Myocardial infarction               | 914    | 1.12 (1.05,1.19)                 | 1,505        | 1.77 (1.69,1.86)                 | 1.58 (1.18,2.12)        | 1,148  | 1.26 (1.19,1.34)                 | 1.13 (0.81,1.56) | 931              | 1.04 (0.97,1.11)                 | 0.93 (0.74,1.16) | 893                   | 1.31 (1.22,1.39)                 | 1.17 (0.93,1.47) |
| Heart Failure                       | 835    | 1.03 (0.96,1.10)                 | 2,197        | 2.61 (2.50,2.72)                 | 2.55 (2.04,3.20)        | 1,507  | 1.66 (1.58,1.75)                 | 1.64 (1.23,2.17) | 1,292            | 1.45 (1.37,1.53)                 | 1.42 (1.16,1.74) | 713                   | 1.04 (0.97,1.12)                 | 1.00 (0.77,1.31) |
| Atrial fibrillation                 | 681    | 0.84 (0.78,0.91)                 | 1,070        | 1.28 (1.20,1.36)                 | 1.52 (1.10,2.10)        | 1,065  | 1.18 (1.11,1.26)                 | 1.40 (1.02,1.94) | 950              | 1.07 (1.00,1.14)                 | 1.27 (1.01,1.59) | 793                   | 1.17 (1.09,1.25)                 | 1.39 (0.96,2.03) |
| Coronary Artery Disease             | 1,700  | 2.15 (2.05,2.25)                 | 2,757        | 3.34 (3.22,3.47)                 | 1.56 (1.25,1.93)        | 2,387  | 2.70 (2.60,2.81)                 | 1.26 (1.00,1.58) | 1,844            | 2.12 (2.02,2.22)                 | 0.99 (0.84,1.15) | 1,503                 | 2.27 (2.16,2.39)                 | 1.05 (0.89,1.25) |
| Deep vein thrombosis                | 149    | 0.18 (0.15,0.21)                 | 275          | 0.32 (0.29,0.36)                 | 1.77 (0.93,3.36)        | 341    | 0.37 (0.33,0.41)                 | 2.04 (1.04,4.00) | 98               | 0.11 (0.09,0.13)                 | 0.59 (0.30,1.16) | 135                   | 0.20 (0.16,0.23)                 | 1.08 (0.47,2.50) |
| Cardiovascular mortality            | 1,575  | 1.92 (1.82,2.01)                 | 3,011        | 3.52 (3.39,3.65)                 | 1.83 (1.52,2.21)        | 1,663  | 1.82 (1.73,1.90)                 | 0.95 (0.73,1.22) | 1,207            | 1.34 (1.26,1.41)                 | 0.70 (0.57,0.86) | 396                   | 0.57 (0.52,0.63)                 | 0.30 (0.20,0.44) |
| Chronic pulmonary disease           | 432    | 0.54 (0.49,0.59)                 | 973          | 1.17 (1.10,1.24)                 | 2.19 (1.50,3.21)        | 857    | 0.96 (0.90,1.02)                 | 1.81 (1.17,2.78) | 555              | 0.63 (0.58,0.68)                 | 1.18 (0.88,1.58) | 422                   | 0.63 (0.57,0.69)                 | 1.15 (0.78,1.68) |
| Acute respiratory distress syndrome | 714    | 0.87 (0.81,0.94)                 | 1,436        | 1.69 (1.61,1.78)                 | 1.94 (1.43,2.62)        | 1,010  | 1.11 (1.04,1.18)                 | 1.27 (0.88,1.83) | 1,016            | 1.13 (1.06,1.20)                 | 1.29 (1.04,1.61) | 592                   | 0.86 (0.80,0.94)                 | 0.99 (0.70,1.41) |
| Seizure                             | 389    | 0.48 (0.43,0.52)                 | 1,073        | 1.28 (1.20,1.35)                 | 2.70 (1.88,3.89)        | 929    | 1.02 (0.96,1.09)                 | 2.18 (1.44,3.31) | 409              | 0.45 (0.41,0.50)                 | 0.97 (0.69,1.35) | 299                   | 0.44 (0.39,0.49)                 | 0.89 (0.48,1.67) |
| End-stage renal disease             | 77     | 0.09 (0.08,0.12)                 | 141          | 0.17 (0.14,0.19)                 | 1.77 (0.62,5.04)        | 181    | 0.20 (0.17,0.23)                 | 2.13 (0.82,5.56) | 39               | 0.04 (0.03,0.06)                 | 0.46 (0.16,1.33) | 0                     | NA                               | NA               |
| Acute kidney injury                 | 355    | 0.43 (0.39,0.48)                 | 672          | 0.79 (0.73,0.85)                 | 1.83 (1.22,2.76)        | 495    | 0.54 (0.50,0.59)                 | 1.26 (0.80,1.97) | 439              | 0.49 (0.44,0.53)                 | 1.13 (0.80,1.61) | 143                   | 0.21 (0.18,0.25)                 | 0.48 (0.26,0.88) |
| Pancreatitis                        | 181    | 0.22 (0.19,0.25)                 | 173          | 0.20 (0.17,0.24)                 | 0.92 (0.44,1.94)        | 184    | 0.20 (0.17,0.23)                 | 0.92 (0.37,2.27) | 193              | 0.21 (0.18,0.25)                 | 0.97 (0.58,1.63) | 103                   | 0.15 (0.12,0.18)                 | 0.68 (0.36,1.28) |
| All-cause mortality                 | 10,015 | 12.19 (11.96,12.43)              | 23,233       | 27.16 (26.81,27.51)              | 2.23 (2.08,2.39)        | 12,940 | 14.12 (13.88,14.37)              | 1.16 (1.06,1.27) | 8,709            | 9.64 (9.44,9.85)                 | 0.79 (0.73,0.86) | 5,518                 | 8.02 (7.81,8.23)                 | 0.66 (0.57,0.75) |

Note: CI: confidence interval, REF: Reference group; Major CVD: Major Cardiovascular Disease; Composite outcome of stroke, heart failure and coronary artery disease

Hazard Ratio (HR) and 95% Confidence Interval (95% CI) were estimated by Cox regression, HR >1 (or <1) indicates patients with COVID-19 had higher (lower) risk of sequelae compared to the non-COVID-19 control cohort

Un-vaccinated, Incomplete vaccinated, Fully Vaccinated and Received booster dose of COVID-19 vaccines refers to patients who have received 0 dose, 1 doses, 2 doses and ≥3 doses of BioNtech or CoronaVac COVID-19 vaccines, respectively

**Supplementary Table 10. Incidence rate and hazard ratio of clinical sequelae in COVID-19 and non-COVID-19 cohort after weighting during 0-30, 31-90, 91-180, 181-270,271-365 days of SARS-CoV-2 infection (Adjusting for the likely variant of SARS-COV-2 responsible for the infection, continued)**

| 181-270 days                        |                |                                  |        |                                  |                  |                         |                                  |                  |                  |                                  |                  |                       |                                  |                  |
|-------------------------------------|----------------|----------------------------------|--------|----------------------------------|------------------|-------------------------|----------------------------------|------------------|------------------|----------------------------------|------------------|-----------------------|----------------------------------|------------------|
| Clinical sequelae                   | Controls (REF) |                                  |        | COVID-19                         |                  |                         |                                  |                  |                  |                                  |                  |                       |                                  |                  |
|                                     | Event          | Incidence per 1,000 person-years | Event  | Unvaccinated                     |                  | Incompletely vaccinated |                                  |                  | Fully vaccinated |                                  |                  | Received booster dose |                                  |                  |
|                                     |                |                                  | Event  | Incidence per 1,000 person-years | Hazard ratio     | Event                   | Incidence per 1,000 person-years | Hazard ratio     | Event            | Incidence per 1,000 person-years | Hazard ratio     | Event                 | Incidence per 1,000 person-years | Hazard ratio     |
| Major CVD                           | 3,464          | 5.79 (5.60,5.99)                 | 5,117  | 8.69 (8.46,8.93)                 | 1.50 (1.29,1.74) | 4,679                   | 7.46 (7.24,7.67)                 | 1.29 (1.10,1.50) | 3,543            | 5.71 (5.53,5.90)                 | 0.99 (0.89,1.10) | 2,506                 | 4.83 (4.64,5.02)                 | 0.83 (0.71,0.98) |
| Stroke                              | 1,928          | 3.09 (2.96,3.23)                 | 2,960  | 4.82 (4.65,4.99)                 | 1.56 (1.28,1.90) | 2,259                   | 3.46 (3.31,3.60)                 | 1.12 (0.90,1.39) | 1,918            | 2.97 (2.84,3.11)                 | 0.96 (0.83,1.11) | 1,299                 | 2.39 (2.26,2.52)                 | 0.77 (0.62,0.96) |
| Myocardial infarction               | 827            | 1.29 (1.20,1.38)                 | 879    | 1.36 (1.28,1.46)                 | 1.06 (0.77,1.45) | 1,212                   | 1.79 (1.69,1.89)                 | 1.39 (1.03,1.87) | 689              | 1.04 (0.96,1.12)                 | 0.80 (0.63,1.03) | 1,084                 | 1.94 (1.82,2.05)                 | 1.52 (0.60,3.82) |
| Heart Failure                       | 772            | 1.21 (1.12,1.29)                 | 1,987  | 3.10 (2.97,3.24)                 | 2.58 (2.06,3.22) | 1,489                   | 2.21 (2.10,2.32)                 | 1.83 (1.42,2.37) | 812              | 1.23 (1.14,1.31)                 | 1.02 (0.80,1.29) | 677                   | 1.21 (1.12,1.31)                 | 1.00 (0.51,1.99) |
| Atrial fibrillation                 | 545            | 0.86 (0.79,0.93)                 | 971    | 1.53 (1.44,1.63)                 | 1.79 (1.30,2.46) | 742                     | 1.11 (1.03,1.19)                 | 1.30 (0.90,1.88) | 782              | 1.19 (1.11,1.27)                 | 1.39 (1.09,1.76) | 381                   | 0.68 (0.62,0.76)                 | 0.79 (0.51,1.24) |
| Coronary Artery Disease             | 1,464          | 2.35 (2.23,2.47)                 | 1,707  | 2.73 (2.60,2.86)                 | 1.16 (0.91,1.48) | 2,000                   | 3.04 (2.91,3.18)                 | 1.29 (1.03,1.63) | 1,587            | 2.46 (2.34,2.58)                 | 1.05 (0.89,1.22) | 1,099                 | 2.04 (1.92,2.16)                 | 0.87 (0.68,1.10) |
| Deep vein thrombosis                | 118            | 0.18 (0.15,0.22)                 | 121    | 0.19 (0.15,0.22)                 | 1.02 (0.51,2.06) | 86                      | 0.13 (0.10,0.15)                 | 0.69 (0.29,1.67) | 136              | 0.20 (0.17,0.24)                 | 1.11 (0.65,1.91) | 48                    | 0.09 (0.06,0.11)                 | 0.47 (0.17,1.30) |
| Cardiovascular mortality            | 987            | 1.53 (1.43,1.62)                 | 1,813  | 2.79 (2.66,2.92)                 | 1.83 (1.46,2.29) | 1,147                   | 1.68 (1.58,1.78)                 | 1.11 (0.84,1.45) | 641              | 0.96 (0.88,1.03)                 | 0.63 (0.48,0.82) | 467                   | 0.83 (0.75,0.90)                 | 0.54 (0.31,0.92) |
| Chronic pulmonary disease           | 361            | 0.57 (0.51,0.63)                 | 877    | 1.39 (1.30,1.48)                 | 2.44 (1.69,3.52) | 630                     | 0.94 (0.87,1.02)                 | 1.66 (1.10,2.51) | 378              | 0.58 (0.52,0.64)                 | 1.01 (0.74,1.40) | 194                   | 0.35 (0.30,0.40)                 | 0.62 (0.38,1.02) |
| Acute respiratory distress syndrome | 562            | 0.87 (0.80,0.95)                 | 886    | 1.37 (1.29,1.47)                 | 1.57 (1.10,2.26) | 577                     | 0.85 (0.78,0.92)                 | 0.97 (0.64,1.47) | 489              | 0.73 (0.67,0.80)                 | 0.84 (0.63,1.11) | 466                   | 0.83 (0.76,0.91)                 | 0.96 (0.45,2.07) |
| Seizure                             | 321            | 0.50 (0.45,0.55)                 | 1,096  | 1.72 (1.62,1.82)                 | 3.45 (2.43,4.90) | 773                     | 1.14 (1.07,1.23)                 | 2.30 (1.52,3.48) | 265              | 0.40 (0.35,0.45)                 | 0.80 (0.54,1.18) | 211                   | 0.38 (0.33,0.43)                 | 0.75 (0.25,2.23) |
| End-stage renal disease             | 52             | 0.08 (0.06,0.11)                 | 103    | 0.16 (0.13,0.19)                 | 1.97 (0.80,4.86) | 108                     | 0.16 (0.13,0.19)                 | 1.96 (0.88,4.39) | 91               | 0.14 (0.11,0.17)                 | 1.68 (0.83,3.37) | 0                     | NA                               | NA               |
| Acute kidney injury                 | 302            | 0.47 (0.42,0.52)                 | 436    | 0.68 (0.61,0.74)                 | 1.44 (0.94,2.20) | 349                     | 0.51 (0.46,0.57)                 | 1.09 (0.66,1.82) | 270              | 0.40 (0.36,0.45)                 | 0.86 (0.57,1.31) | 98                    | 0.17 (0.14,0.21)                 | 0.37 (0.17,0.81) |
| Pancreatitis                        | 173            | 0.27 (0.23,0.31)                 | 248    | 0.38 (0.34,0.43)                 | 1.43 (0.75,2.72) | 161                     | 0.24 (0.20,0.28)                 | 0.89 (0.37,2.15) | 147              | 0.22 (0.19,0.26)                 | 0.82 (0.50,1.34) | 82                    | 0.14 (0.12,0.18)                 | 0.54 (0.25,1.18) |
| All-cause mortality                 | 8,094          | 12.50 (12.23,12.78)              | 16,767 | 25.80 (25.41,26.19)              | 2.06 (1.91,2.23) | 9,604                   | 14.07 (13.79,14.36)              | 1.13 (1.02,1.24) | 5,561            | 8.31 (8.09,8.53)                 | 0.66 (0.60,0.73) | 7,917                 | 14.01 (13.71,14.32)              | 1.12 (0.76,1.64) |

Note: CI: confidence interval, REF: Reference group; Major CVD: Major Cardiovascular Disease; Composite outcome of stroke, heart failure and coronary artery disease  
Hazard Ratio (HR) and 95% Confidence Interval (95% CI) were estimated by Cox regression, HR >1 (or <1) indicates patients with COVID-19 had higher (lower) risk of sequelae compared to the non-COVID-19 control cohort  
Un-vaccinated, Incomplete vaccinated, Fully Vaccinated and Received booster dose of COVID-19 vaccines refers to patients who have received 0 dose, 1 doses, 2 doses and ≥3 doses of BioNtech or CoronaVac COVID-19 vaccines, respectively

**Supplementary Table 10. Incidence rate and hazard ratio of clinical sequelae in COVID-19 and non-COVID-19 cohort after weighting during 0-30, 31-90, 91-180, 181-270,271-365 days of SARS-CoV-2 infection (Adjusting for the likely variant of SARS-COV-2 responsible for the infection, continued)**

| 271-365 days                        |                |                                  |        |                                  |                   |                         |                                  |                  |                  |                                  |                  |                       |                                  |                   |
|-------------------------------------|----------------|----------------------------------|--------|----------------------------------|-------------------|-------------------------|----------------------------------|------------------|------------------|----------------------------------|------------------|-----------------------|----------------------------------|-------------------|
| Clinical sequelae                   | Controls (REF) |                                  |        | COVID-19                         |                   |                         |                                  |                  |                  |                                  |                  |                       |                                  |                   |
|                                     | Event          | Incidence per 1,000 person-years | Event  | Unvaccinated                     |                   | Incompletely vaccinated |                                  |                  | Fully vaccinated |                                  |                  | Received booster dose |                                  |                   |
|                                     |                |                                  | Event  | Incidence per 1,000 person-years | Hazard ratio      | Event                   | Incidence per 1,000 person-years | Hazard ratio     | Event            | Incidence per 1,000 person-years | Hazard ratio     | Event                 | Incidence per 1,000 person-years | Hazard ratio      |
| Major CVD                           | 2,091          | 6.03 (5.77,6.29)                 | 2,469  | 7.53 (7.23,7.83)                 | 1.26 (1.03,1.55)  | 2,346                   | 6.96 (6.68,7.25)                 | 1.15 (0.93,1.42) | 1,815            | 5.25 (5.01,5.50)                 | 0.87 (0.76,1.01) | 1,623                 | 4.88 (4.65,5.13)                 | 0.80 (0.59,1.07)  |
| Stroke                              | 1,099          | 3.04 (2.86,3.22)                 | 1,170  | 3.42 (3.23,3.62)                 | 1.13 (0.84,1.53)  | 925                     | 2.64 (2.47,2.81)                 | 0.86 (0.62,1.21) | 963              | 2.68 (2.52,2.86)                 | 0.88 (0.73,1.08) | 1,003                 | 2.86 (2.69,3.04)                 | 0.92 (0.59,1.44)  |
| Myocardial infarction               | 510            | 1.37 (1.26,1.49)                 | 512    | 1.43 (1.32,1.56)                 | 1.06 (0.69,1.62)  | 649                     | 1.79 (1.66,1.94)                 | 1.30 (0.87,1.94) | 459              | 1.24 (1.13,1.36)                 | 0.91 (0.67,1.23) | 242                   | 0.67 (0.59,0.76)                 | 0.48 (0.30,0.77)  |
| Heart Failure                       | 573            | 1.54 (1.42,1.68)                 | 1,122  | 3.16 (2.98,3.35)                 | 2.07 (1.56,2.74)  | 938                     | 2.60 (2.44,2.77)                 | 1.68 (1.24,2.27) | 654              | 1.78 (1.64,1.91)                 | 1.15 (0.88,1.51) | 391                   | 1.08 (0.98,1.19)                 | 0.69 (0.33,1.45)  |
| Atrial fibrillation                 | 307            | 0.83 (0.74,0.93)                 | 509    | 1.44 (1.32,1.57)                 | 1.74 (1.09,2.79)  | 410                     | 1.14 (1.04,1.26)                 | 1.38 (0.84,2.26) | 318              | 0.87 (0.77,0.97)                 | 1.04 (0.73,1.49) | 563                   | 1.56 (1.44,1.69)                 | 1.86 (0.64,5.40)  |
| Coronary Artery Disease             | 868            | 2.41 (2.25,2.57)                 | 831    | 2.39 (2.23,2.56)                 | 1.00 (0.70,1.41)  | 994                     | 2.83 (2.65,3.00)                 | 1.17 (0.85,1.63) | 678              | 1.89 (1.75,2.03)                 | 0.79 (0.62,1.00) | 644                   | 1.85 (1.71,2.00)                 | 0.76 (0.51,1.15)  |
| Deep vein thrombosis                | 56             | 0.15 (0.12,0.19)                 | 147    | 0.41 (0.35,0.48)                 | 2.74 (1.20,6.26)  | 30                      | 0.08 (0.06,0.12)                 | 0.55 (0.13,2.29) | 29               | 0.08 (0.05,0.11)                 | 0.53 (0.19,1.51) | 28                    | 0.08 (0.05,0.11)                 | 0.49 (0.12,2.05)  |
| Cardiovascular mortality            | 110            | 0.29 (0.24,0.35)                 | 109    | 0.30 (0.25,0.36)                 | 1.01 (0.44,2.30)  | 52                      | 0.14 (0.11,0.18)                 | 0.48 (0.15,1.57) | 8                | 0.02 (0.01,0.04)                 | 0.07 (0.01,0.50) | 0                     | NA                               | NA                |
| Chronic pulmonary disease           | 287            | 0.78 (0.69,0.87)                 | 371    | 1.06 (0.95,1.17)                 | 1.37 (0.81,2.32)  | 465                     | 1.30 (1.19,1.42)                 | 1.67 (1.02,2.73) | 341              | 0.94 (0.84,1.04)                 | 1.20 (0.84,1.73) | 108                   | 0.30 (0.25,0.36)                 | 0.38 (0.19,0.75)  |
| Acute respiratory distress syndrome | 286            | 0.77 (0.68,0.86)                 | 363    | 1.02 (0.91,1.12)                 | 1.33 (0.76,2.31)  | 495                     | 1.36 (1.25,1.49)                 | 1.76 (1.14,2.72) | 301              | 0.81 (0.73,0.91)                 | 1.06 (0.72,1.57) | 594                   | 1.64 (1.51,1.77)                 | 2.08 (0.59,7.29)  |
| Seizure                             | 180            | 0.48 (0.42,0.56)                 | 273    | 0.77 (0.68,0.87)                 | 1.61 (0.86,3.01)  | 312                     | 0.86 (0.77,0.97)                 | 1.78 (0.97,3.25) | 142              | 0.38 (0.32,0.45)                 | 0.79 (0.50,1.25) | 125                   | 0.34 (0.29,0.41)                 | 0.69 (0.19,2.56)  |
| End-stage renal disease             | 42             | 0.11 (0.08,0.15)                 | 173    | 0.48 (0.41,0.56)                 | 4.36 (1.83,10.38) | 56                      | 0.15 (0.12,0.20)                 | 1.36 (0.40,4.61) | 4                | 0.01 (0.00,0.03)                 | 0.10 (0.01,0.78) | 57                    | 0.16 (0.12,0.20)                 | 1.34 (0.18,9.98)  |
| Acute kidney injury                 | 151            | 0.40 (0.34,0.47)                 | 187    | 0.52 (0.45,0.60)                 | 1.30 (0.69,2.46)  | 92                      | 0.25 (0.21,0.31)                 | 0.62 (0.25,1.58) | 95               | 0.26 (0.21,0.31)                 | 0.64 (0.34,1.21) | 417                   | 1.14 (1.04,1.25)                 | 2.71 (0.49,14.88) |
| Pancreatitis                        | 79             | 0.21 (0.17,0.26)                 | 207    | 0.58 (0.50,0.66)                 | 2.74 (1.24,6.06)  | 117                     | 0.32 (0.27,0.38)                 | 1.50 (0.54,4.18) | 34               | 0.09 (0.06,0.12)                 | 0.43 (0.17,1.10) | 19                    | 0.05 (0.03,0.08)                 | 0.24 (0.03,1.75)  |
| All-cause mortality                 | 4,662          | 12.43 (12.08,12.79)              | 10,053 | 27.93 (27.39,28.48)              | 2.26 (2.05,2.49)  | 4,376                   | 12.00 (11.65,12.36)              | 0.96 (0.84,1.10) | 3,373            | 9.07 (8.77,9.38)                 | 0.73 (0.65,0.82) | 1,423                 | 3.88 (3.68,4.08)                 | 0.31 (0.20,0.47)  |

Note: CI: confidence interval, REF: Reference group; Major CVD: Major Cardiovascular Disease; Composite outcome of stroke, heart failure and coronary artery disease  
Hazard Ratio (HR) and 95% Confidence Interval (95% CI) were estimated by Cox regression, HR >1 (or <1) indicates patients with COVID-19 had higher (lower) risk of sequelae compared to the non-COVID-19 control cohort  
Un-vaccinated, Incomplete vaccinated, Fully Vaccinated and Received booster dose of COVID-19 vaccines refers to patients who have received 0 dose, 1 doses, 2 doses and ≥3 doses of BioNtech or CoronaVac COVID-19 vaccines, respectively

**Supplementary Table 11. P-value, rank and critical values of clinical sequelae estimated by the Benjamini–Hochberg procedure**

| Day 0-30                            |              |      |                |                         |      |                |                  |      |                |                       |      |                |
|-------------------------------------|--------------|------|----------------|-------------------------|------|----------------|------------------|------|----------------|-----------------------|------|----------------|
| Clinical sequelae                   | Unvaccinated |      |                | Incompletely vaccinated |      |                | Fully vaccinated |      |                | Received booster dose |      |                |
|                                     | P-value      | Rank | Critical value | P-value                 | Rank | Critical value | P-value          | Rank | Critical value | P-value               | Rank | Critical value |
| Major CVD                           | <0.001       | 5    | 0.01           | <0.001                  | 12   | 0.01           | <0.001           | 8    | 0.01           | <0.001                | 18   | 0.02           |
| Stroke                              | <0.001       | 6    | 0.01           | <0.001                  | 19   | 0.02           | <0.001           | 10   | 0.01           | <0.001                | 26   | 0.03           |
| Myocardial infarction               | <0.001       | 7    | 0.01           | <0.001                  | 16   | 0.02           | <0.001           | 20   | 0.02           | <0.001                | 21   | 0.02           |
| Heart Failure                       | <0.001       | 14   | 0.01           | <0.001                  | 32   | 0.03           | <0.001           | 38   | 0.04           | 0.194                 | 57   | 0.06           |
| Atrial fibrillation                 | <0.001       | 29   | 0.03           | <0.001                  | 36   | 0.04           | <0.001           | 41   | 0.04           | <0.001                | 31   | 0.03           |
| Coronary Artery Disease             | <0.001       | 9    | 0.01           | <0.001                  | 23   | 0.02           | <0.001           | 22   | 0.02           | <0.001                | 27   | 0.03           |
| Deep vein thrombosis                | <0.001       | 39   | 0.04           | <0.001                  | 42   | 0.04           | 0.011            | 53   | 0.06           | 0.182                 | 56   | 0.06           |
| Cardiovascular mortality            | <0.001       | 4    | 0.00           | <0.001                  | 11   | 0.01           | <0.001           | 25   | 0.03           | 0.776                 | 60   | 0.06           |
| Chronic pulmonary disease           | <0.001       | 47   | 0.05           | <0.001                  | 30   | 0.03           | <0.001           | 35   | 0.04           | 0.002                 | 50   | 0.05           |
| Acute respiratory distress syndrome | <0.001       | 13   | 0.01           | <0.001                  | 33   | 0.03           | <0.001           | 43   | 0.04           | <0.001                | 44   | 0.05           |
| Seizure                             | <0.001       | 24   | 0.03           | <0.001                  | 37   | 0.04           | 0.001            | 48   | 0.05           | 0.001                 | 49   | 0.05           |
| End-stage renal disease             | <0.001       | 45   | 0.05           | 0.572                   | 59   | 0.06           | 0.044            | 54   | 0.06           | 0.206                 | 58   | 0.06           |
| Acute kidney injury                 | <0.001       | 15   | 0.02           | <0.001                  | 17   | 0.02           | <0.001           | 40   | 0.04           | <0.001                | 34   | 0.04           |
| Pancreatitis                        | <0.001       | 46   | 0.05           | 0.115                   | 55   | 0.06           | 0.003            | 51   | 0.05           | 0.004                 | 52   | 0.05           |
| All-cause mortality                 | <0.001       | 1    | 0.00           | <0.001                  | 2    | 0.00           | <0.001           | 3    | 0.00           | <0.001                | 28   | 0.03           |

Un-vaccinated, Incomplete vaccinated, Fully Vaccinated and Received booster dose of COVID-19 vaccines refers to patients who have received 0 dose, 1 doses, 2 doses and  $\geq 3$  doses of BioNtech or CoronaVac COVID-19 vaccines, respectively

All P-value reported were two-sided without adjustment for multiple comparison; the exact P-value were presented except for value <0.001

Benjamini-Hochberg critical value, using the formula  $(i/m)Q$ , where  $i$  = the individual p-value's rank,  $m$  = total number of tests,  $Q$  = the false discovery rate set at 0.05 (5%)

**Supplementary Table 11. P-value, rank and critical values of clinical sequelae estimated by the Benjamini–Hochberg procedure (Continued)**

| <b>Day 31-90</b>                    |                     |             |                       |                                |             |                       |                         |             |                       |                              |             |                       |
|-------------------------------------|---------------------|-------------|-----------------------|--------------------------------|-------------|-----------------------|-------------------------|-------------|-----------------------|------------------------------|-------------|-----------------------|
| <b>Clinical sequelae</b>            | <b>Unvaccinated</b> |             |                       | <b>Incompletely vaccinated</b> |             |                       | <b>Fully vaccinated</b> |             |                       | <b>Received booster dose</b> |             |                       |
|                                     | <b>P-value</b>      | <b>Rank</b> | <b>Critical value</b> | <b>P-value</b>                 | <b>Rank</b> | <b>Critical value</b> | <b>P-value</b>          | <b>Rank</b> | <b>Critical value</b> | <b>P-value</b>               | <b>Rank</b> | <b>Critical value</b> |
| Major CVD                           | <0.001              | 4           | 0.00                  | <0.001                         | 14          | 0.01                  | 0.346                   | 46          | 0.05                  | 0.097                        | 37          | 0.04                  |
| Stroke                              | <0.001              | 10          | 0.01                  | 0.007                          | 24          | 0.03                  | 0.970                   | 58          | 0.06                  | 0.250                        | 42          | 0.04                  |
| Myocardial infarction               | <0.001              | 17          | 0.02                  | 0.987                          | 60          | 0.06                  | 0.788                   | 55          | 0.06                  | 0.959                        | 57          | 0.06                  |
| Heart Failure                       | <0.001              | 3           | 0.00                  | <0.001                         | 16          | 0.02                  | 0.003                   | 21          | 0.02                  | 0.020                        | 27          | 0.03                  |
| Atrial fibrillation                 | <0.001              | 8           | 0.01                  | 0.044                          | 31          | 0.03                  | 0.043                   | 30          | 0.03                  | 0.680                        | 53          | 0.06                  |
| Coronary Artery Disease             | <0.001              | 7           | 0.01                  | 0.118                          | 38          | 0.04                  | 0.323                   | 45          | 0.05                  | 0.002                        | 20          | 0.02                  |
| Deep vein thrombosis                | <0.001              | 11          | 0.01                  | 0.064                          | 32          | 0.03                  | 0.004                   | 23          | 0.02                  | 0.732                        | 54          | 0.06                  |
| Cardiovascular mortality            | <0.001              | 5           | 0.01                  | 0.156                          | 40          | 0.04                  | 0.652                   | 52          | 0.05                  | <0.001                       | 15          | 0.02                  |
| Chronic pulmonary disease           | <0.001              | 9           | 0.01                  | 0.004                          | 22          | 0.02                  | 0.209                   | 41          | 0.04                  | 0.583                        | 51          | 0.05                  |
| Acute respiratory distress syndrome | 0.001               | 19          | 0.02                  | 0.009                          | 25          | 0.03                  | 0.294                   | 43          | 0.04                  | 0.081                        | 34          | 0.04                  |
| Seizure                             | <0.001              | 13          | 0.01                  | 0.024                          | 28          | 0.03                  | 0.303                   | 44          | 0.05                  | 0.148                        | 39          | 0.04                  |
| End-stage renal disease             | 0.348               | 47          | 0.05                  | 0.097                          | 36          | 0.04                  | 0.971                   | 59          | 0.06                  | 0.071                        | 33          | 0.03                  |
| Acute kidney injury                 | <0.001              | 6           | 0.01                  | <0.001                         | 18          | 0.02                  | 0.368                   | 49          | 0.05                  | 0.361                        | 48          | 0.05                  |
| Pancreatitis                        | <0.001              | 12          | 0.01                  | 0.091                          | 35          | 0.04                  | 0.816                   | 56          | 0.06                  | 0.431                        | 50          | 0.05                  |
| All-cause mortality                 | <0.001              | 1           | 0.00                  | <0.001                         | 2           | 0.00                  | 0.012                   | 26          | 0.03                  | 0.035                        | 29          | 0.03                  |

Un-vaccinated, Incomplete vaccinated, Fully Vaccinated and Received booster dose of COVID-19 vaccines refers to patients who have received 0 dose, 1 doses, 2 doses and  $\geq 3$  doses of BioNtech or CoronaVac COVID-19 vaccines, respectively  
 All P-value reported were two-sided without adjustment for multiple comparison; the exact P-value were presented except for value <0.001  
 Benjamini-Hochberg critical value, using the formula  $(i/m)Q$ , where  $i$  = the individual p-value's rank,  $m$  = total number of tests,  $Q$  = the false discovery rate set at 0.05 (5%)

**Supplementary Table 11. P-value, rank and critical values of clinical sequelae estimated by the Benjamini–Hochberg procedure (Continued)**

| <b>Day 91-180</b>                   |                     |             |                       |                                |             |                       |                         |             |                       |                              |             |                       |
|-------------------------------------|---------------------|-------------|-----------------------|--------------------------------|-------------|-----------------------|-------------------------|-------------|-----------------------|------------------------------|-------------|-----------------------|
| <b>Clinical sequelae</b>            | <b>Unvaccinated</b> |             |                       | <b>Incompletely vaccinated</b> |             |                       | <b>Fully vaccinated</b> |             |                       | <b>Received booster dose</b> |             |                       |
|                                     | <b>P-value</b>      | <b>Rank</b> | <b>Critical value</b> | <b>P-value</b>                 | <b>Rank</b> | <b>Critical value</b> | <b>P-value</b>          | <b>Rank</b> | <b>Critical value</b> | <b>P-value</b>               | <b>Rank</b> | <b>Critical value</b> |
| Major CVD                           | <0.001              | 7           | 0.01                  | 0.005                          | 20          | 0.02                  | 0.791                   | 52          | 0.05                  | 0.036                        | 30          | 0.03                  |
| Stroke                              | 0.014               | 23          | 0.02                  | 0.121                          | 34          | 0.04                  | 0.758                   | 50          | 0.05                  | <0.001                       | 13          | 0.01                  |
| Myocardial infarction               | 0.003               | 19          | 0.02                  | 0.448                          | 44          | 0.05                  | 0.558                   | 48          | 0.05                  | 0.197                        | 39          | 0.04                  |
| Heart Failure                       | <0.001              | 3           | 0.00                  | 0.001                          | 15          | 0.02                  | 0.001                   | 16          | 0.02                  | 0.987                        | 60          | 0.06                  |
| Atrial fibrillation                 | 0.018               | 25          | 0.03                  | 0.032                          | 28          | 0.03                  | 0.031                   | 27          | 0.03                  | 0.077                        | 32          | 0.03                  |
| Coronary Artery Disease             | <0.001              | 14          | 0.01                  | 0.040                          | 31          | 0.03                  | 0.931                   | 58          | 0.06                  | 0.549                        | 47          | 0.05                  |
| Deep vein thrombosis                | 0.122               | 35          | 0.04                  | 0.036                          | 29          | 0.03                  | 0.131                   | 36          | 0.04                  | 0.867                        | 55          | 0.06                  |
| Cardiovascular mortality            | <0.001              | 6           | 0.01                  | 0.771                          | 51          | 0.05                  | 0.001                   | 18          | 0.02                  | <0.001                       | 4           | 0.00                  |
| Chronic pulmonary disease           | <0.001              | 11          | 0.01                  | 0.006                          | 21          | 0.02                  | 0.246                   | 41          | 0.04                  | 0.479                        | 46          | 0.05                  |
| Acute respiratory distress syndrome | <0.001              | 10          | 0.01                  | 0.187                          | 38          | 0.04                  | 0.020                   | 26          | 0.03                  | 0.947                        | 59          | 0.06                  |
| Seizure                             | <0.001              | 9           | 0.01                  | <0.001                         | 12          | 0.01                  | 0.878                   | 56          | 0.06                  | 0.701                        | 49          | 0.05                  |
| End-stage renal disease             | 0.353               | 43          | 0.04                  | 0.117                          | 33          | 0.03                  | 0.157                   | 37          | 0.04                  | <0.001                       | 1           | 0.00                  |
| Acute kidney injury                 | 0.010               | 22          | 0.02                  | 0.299                          | 42          | 0.04                  | 0.477                   | 45          | 0.05                  | 0.017                        | 24          | 0.03                  |
| Pancreatitis                        | 0.855               | 53          | 0.06                  | 0.856                          | 54          | 0.06                  | 0.921                   | 57          | 0.06                  | 0.244                        | 40          | 0.04                  |
| All-cause mortality                 | <0.001              | 2           | 0.00                  | 0.001                          | 17          | 0.02                  | <0.001                  | 8           | 0.01                  | <0.001                       | 5           | 0.01                  |

Un-vaccinated, Incomplete vaccinated, Fully Vaccinated and Received booster dose of COVID-19 vaccines refers to patients who have received 0 dose, 1 doses, 2 doses and  $\geq 3$  doses of BioNtech or CoronaVac COVID-19 vaccines, respectively  
 All P-value reported were two-sided without adjustment for multiple comparison; the exact P-value were presented except for value <0.001  
 Benjamini-Hochberg critical value, using the formula  $(i/m)Q$ , where  $i$  = the individual p-value's rank,  $m$  = total number of tests,  $Q$  = the false discovery rate set at 0.05 (5%)

**Supplementary Table 11. P-value, rank and critical values of clinical sequelae estimated by the Benjamini–Hochberg procedure (Continued)**

| Day 181-270                         |              |      |                |                         |      |                |                  |      |                |                       |      |                |
|-------------------------------------|--------------|------|----------------|-------------------------|------|----------------|------------------|------|----------------|-----------------------|------|----------------|
| Clinical sequelae                   | Unvaccinated |      |                | Incompletely vaccinated |      |                | Fully vaccinated |      |                | Received booster dose |      |                |
|                                     | P-value      | Rank | Critical value | P-value                 | Rank | Critical value | P-value          | Rank | Critical value | P-value               | Rank | Critical value |
| Major CVD                           | <0.001       | 7    | 0.01           | 0.001                   | 13   | 0.01           | 0.936            | 58   | 0.06           | 0.025                 | 23   | 0.02           |
| Stroke                              | <0.001       | 11   | 0.01           | 0.274                   | 37   | 0.04           | 0.679            | 50   | 0.05           | 0.020                 | 19   | 0.02           |
| Myocardial infarction               | 0.717        | 52   | 0.05           | 0.027                   | 24   | 0.03           | 0.093            | 27   | 0.03           | 0.369                 | 41   | 0.04           |
| Heart Failure                       | <0.001       | 4    | 0.00           | <0.001                  | 8    | 0.01           | 0.819            | 54   | 0.06           | 0.986                 | 60   | 0.06           |
| Atrial fibrillation                 | <0.001       | 12   | 0.01           | 0.146                   | 32   | 0.03           | 0.005            | 15   | 0.02           | 0.300                 | 40   | 0.04           |
| Coronary Artery Disease             | 0.278        | 38   | 0.04           | 0.023                   | 21   | 0.02           | 0.489            | 45   | 0.05           | 0.231                 | 35   | 0.04           |
| Deep vein thrombosis                | 0.961        | 59   | 0.06           | 0.460                   | 44   | 0.05           | 0.592            | 48   | 0.05           | 0.163                 | 33   | 0.03           |
| Cardiovascular mortality            | <0.001       | 6    | 0.01           | 0.417                   | 42   | 0.04           | 0.001            | 14   | 0.01           | 0.022                 | 20   | 0.02           |
| Chronic pulmonary disease           | <0.001       | 9    | 0.01           | 0.014                   | 18   | 0.02           | 0.888            | 55   | 0.06           | 0.060                 | 25   | 0.03           |
| Acute respiratory distress syndrome | 0.023        | 22   | 0.02           | 0.931                   | 57   | 0.06           | 0.249            | 36   | 0.04           | 0.917                 | 56   | 0.06           |
| Seizure                             | <0.001       | 5    | 0.01           | <0.001                  | 10   | 0.01           | 0.285            | 39   | 0.04           | 0.610                 | 49   | 0.05           |
| End-stage renal disease             | 0.187        | 34   | 0.04           | 0.096                   | 28   | 0.03           | 0.144            | 31   | 0.03           | <0.001                | 1    | 0.00           |
| Acute kidney injury                 | 0.067        | 26   | 0.03           | 0.697                   | 51   | 0.05           | 0.522            | 46   | 0.05           | 0.012                 | 17   | 0.02           |
| Pancreatitis                        | 0.097        | 29   | 0.03           | 0.815                   | 53   | 0.06           | 0.454            | 43   | 0.04           | 0.115                 | 30   | 0.03           |
| All-cause mortality                 | <0.001       | 2    | 0.00           | 0.007                   | 16   | 0.02           | <0.001           | 3    | 0.00           | 0.583                 | 47   | 0.05           |

Un-vaccinated, Incomplete vaccinated, Fully Vaccinated and Received booster dose of COVID-19 vaccines refers to patients who have received 0 dose, 1 doses, 2 doses and  $\geq 3$  doses of BioNTech or CoronaVac COVID-19 vaccines, respectively

All P-value reported were two-sided without adjustment for multiple comparison; the exact P-value were presented except for value <0.001

Benjamini-Hochberg critical value, using the formula  $(i/m)Q$ , where  $i$  = the individual p-value's rank,  $m$  = total number of tests,  $Q$  = the false discovery rate set at 0.05 (5%)

**Supplementary Table 11. P-value, rank and critical value of clinical sequelae estimated by the Benjamini–Hochberg procedure (Continued)**

| Day 271-365                         |              |      |                |                         |      |                |                  |      |                |                       |      |                |
|-------------------------------------|--------------|------|----------------|-------------------------|------|----------------|------------------|------|----------------|-----------------------|------|----------------|
| Clinical sequelae                   | Unvaccinated |      |                | Incompletely vaccinated |      |                | Fully vaccinated |      |                | Received booster dose |      |                |
|                                     | P-value      | Rank | Critical value | P-value                 | Rank | Critical value | P-value          | Rank | Critical value | P-value               | Rank | Critical value |
| Major CVD                           | 0.147        | 23   | 0.02           | 0.147                   | 24   | 0.03           | 0.098            | 20   | 0.02           | 0.129                 | 22   | 0.02           |
| Stroke                              | 0.657        | 55   | 0.06           | 0.460                   | 48   | 0.05           | 0.284            | 39   | 0.04           | 0.735                 | 57   | 0.06           |
| Myocardial infarction               | 0.851        | 60   | 0.06           | 0.171                   | 26   | 0.03           | 0.599            | 53   | 0.06           | 0.002                 | 8    | 0.01           |
| Heart Failure                       | <0.001       | 5    | 0.01           | 0.001                   | 6    | 0.01           | 0.264            | 36   | 0.04           | 0.325                 | 41   | 0.04           |
| Atrial fibrillation                 | 0.031        | 14   | 0.01           | 0.176                   | 27   | 0.03           | 0.726            | 56   | 0.06           | 0.251                 | 34   | 0.04           |
| Coronary Artery Disease             | 0.502        | 49   | 0.05           | 0.278                   | 37   | 0.04           | 0.066            | 18   | 0.02           | 0.191                 | 30   | 0.03           |
| Deep vein thrombosis                | 0.032        | 15   | 0.02           | 0.423                   | 47   | 0.05           | 0.245            | 33   | 0.03           | 0.328                 | 42   | 0.04           |
| Cardiovascular mortality            | 0.125        | 21   | 0.02           | 0.373                   | 45   | 0.05           | 0.013            | 11   | 0.01           | <0.001                | 1    | 0.00           |
| Chronic pulmonary disease           | 0.239        | 32   | 0.03           | 0.037                   | 16   | 0.02           | 0.279            | 38   | 0.04           | 0.005                 | 9    | 0.01           |
| Acute respiratory distress syndrome | 0.311        | 40   | 0.04           | 0.006                   | 10   | 0.01           | 0.616            | 54   | 0.06           | 0.237                 | 31   | 0.03           |
| Seizure                             | 0.181        | 29   | 0.03           | 0.054                   | 17   | 0.02           | 0.346            | 44   | 0.05           | 0.579                 | 51   | 0.05           |
| End-stage renal disease             | 0.001        | 7    | 0.01           | 0.581                   | 52   | 0.05           | 0.030            | 13   | 0.01           | 0.753                 | 58   | 0.06           |
| Acute kidney injury                 | 0.553        | 50   | 0.05           | 0.336                   | 43   | 0.04           | 0.179            | 28   | 0.03           | 0.252                 | 35   | 0.04           |
| Pancreatitis                        | 0.025        | 12   | 0.01           | 0.417                   | 46   | 0.05           | 0.083            | 19   | 0.02           | 0.159                 | 25   | 0.03           |
| All-cause mortality                 | <0.001       | 2    | 0.00           | 0.810                   | 59   | 0.06           | <0.001           | 4    | 0.00           | <0.001                | 3    | 0.00           |

Un-vaccinated, Incomplete vaccinated, Fully Vaccinated and Received booster dose of COVID-19 vaccines refers to patients who have received 0 dose, 1 doses, 2 doses and  $\geq 3$  doses of BioNtech or CoronaVac COVID-19 vaccines, respectively. All P-value reported were two-sided without adjustment for multiple comparison; the exact P-value were presented except for value <0.001. Benjamini-Hochberg critical value, using the formula  $(i/m)Q$ , where  $i$  = the individual p-value's rank,  $m$  = total number of tests,  $Q$  = the false discovery rate set at 0.05 (5%).



**Supplementary Table 12. Incidence rate and hazard ratio of lung cancer, brain cancer and lymphoma in COVID-19 and non-COVID-19 cohort after weighting during 0-30, 31-90, 91-180, 181-270, 271-365 days of SARS-CoV-2 infection**

| Clinical sequelae   | Controls (REF) |                                  | COVID-19     |                                  |                      |                      |                                  |                      |                    |                                  |                     |                          |                                  |                     |
|---------------------|----------------|----------------------------------|--------------|----------------------------------|----------------------|----------------------|----------------------------------|----------------------|--------------------|----------------------------------|---------------------|--------------------------|----------------------------------|---------------------|
|                     | Event          | Incidence per 1,000 person-years | Unvaccinated |                                  |                      | Received single dose |                                  |                      | Received two doses |                                  |                     | Received booster dose(s) |                                  |                     |
|                     |                |                                  | Event        | Incidence per 1,000 person-years | Hazard ratio         | Event                | Incidence per 1,000 person-years | Hazard ratio         | Event              | Incidence per 1,000 person-years | Hazard ratio        | Event                    | Incidence per 1,000 person-years | Hazard ratio        |
| <b>0-30 days</b>    |                |                                  |              |                                  |                      |                      |                                  |                      |                    |                                  |                     |                          |                                  |                     |
| Lung Cancer         | 221            | 0.68<br>(0.60,0.78)              | 384          | 1.21 (1.10,1.34)                 | 1.77<br>(1.08,2.90)  | 312                  | 0.98<br>(0.87,1.09)              | 1.43<br>(0.79,2.58)  | 297                | 0.92<br>(0.82,1.03)              | 1.35<br>(0.90,2.03) | 247                      | 0.76<br>(0.67,0.86)              | 1.12<br>(0.70,1.77) |
| Brain Cancer        | 12             | 0.04<br>(0.02,0.06)              | 30           | 0.09 (0.06,0.13)                 | 2.44<br>(0.31,19.42) | 42                   | 0.13<br>(0.10,0.18)              | 3.46<br>(0.43,27.75) | 9                  | 0.03<br>(0.01,0.05)              | 0.74<br>(0.09,5.95) | 19                       | 0.06<br>(0.03,0.09)              | 1.52<br>(0.32,7.19) |
| Lymphoma            | 112            | 0.35<br>(0.29,0.42)              | 309          | 0.97 (0.87,1.09)                 | 2.81<br>(1.46,5.41)  | 114                  | 0.36<br>(0.30,0.43)              | 1.03<br>(0.40,2.68)  | 183                | 0.57<br>(0.49,0.65)              | 1.64<br>(0.98,2.73) | 205                      | 0.63<br>(0.55,0.72)              | 1.82<br>(1.06,3.11) |
| <b>31-90 days</b>   |                |                                  |              |                                  |                      |                      |                                  |                      |                    |                                  |                     |                          |                                  |                     |
| Lung Cancer         | 505            | 0.80<br>(0.73,0.87)              | 1,102        | 1.78 (1.68,1.89)                 | 2.23<br>(1.60,3.11)  | 609                  | 0.97<br>(0.90,1.05)              | 1.22<br>(0.75,1.98)  | 716                | 1.14<br>(1.06,1.22)              | 1.43<br>(1.10,1.86) | 483                      | 0.76<br>(0.70,0.84)              | 0.96<br>(0.72,1.29) |
| Brain Cancer        | 17             | 0.03<br>(0.02,0.04)              | 62           | 0.10 (0.08,0.13)                 | 3.67<br>(0.77,17.44) | 0                    | NA                               | NA                   | 0                  | NA                               | NA                  | 7                        | 0.01<br>(0.00,0.02)              | 0.38<br>(0.05,2.91) |
| Lymphoma            | 243            | 0.38<br>(0.34,0.43)              | 319          | 0.51 (0.46,0.57)                 | 1.34<br>(0.68,2.66)  | 206                  | 0.33<br>(0.29,0.38)              | 0.86<br>(0.36,2.06)  | 345                | 0.55<br>(0.49,0.61)              | 1.43<br>(0.99,2.06) | 396                      | 0.62<br>(0.56,0.69)              | 1.63<br>(1.11,2.38) |
| <b>91-180 days</b>  |                |                                  |              |                                  |                      |                      |                                  |                      |                    |                                  |                     |                          |                                  |                     |
| Lung Cancer         | 844            | 1.03<br>(0.96,1.10)              | 1,236        | 1.43 (1.35,1.51)                 | 1.38<br>(1.00,1.92)  | 1,258                | 1.38<br>(1.30,1.46)              | 1.34<br>(0.97,1.84)  | 1,021              | 1.14<br>(1.07,1.21)              | 1.10<br>(0.89,1.37) | 562                      | 0.82<br>(0.75,0.89)              | 0.79<br>(0.60,1.04) |
| Brain Cancer        | 20             | 0.02<br>(0.02,0.04)              | 0            | NA                               | NA                   | 0                    | NA                               | NA                   | 10                 | 0.01<br>(0.01,0.02)              | 0.47<br>(0.06,3.70) | 22                       | 0.03<br>(0.02,0.05)              | 1.27<br>(0.36,4.50) |
| Lymphoma            | 288            | 0.35<br>(0.31,0.39)              | 571          | 0.66 (0.61,0.71)                 | 1.86<br>(1.10,3.15)  | 285                  | 0.31<br>(0.28,0.35)              | 0.88<br>(0.46,1.68)  | 397                | 0.44<br>(0.40,0.48)              | 1.24<br>(0.88,1.74) | 341                      | 0.49<br>(0.44,0.55)              | 1.43<br>(0.96,2.15) |
| <b>181-270 days</b> |                |                                  |              |                                  |                      |                      |                                  |                      |                    |                                  |                     |                          |                                  |                     |
| Lung Cancer         | 619            | 0.96<br>(0.89,1.04)              | 876          | 1.33 (1.25,1.42)                 | 1.39<br>(0.98,1.96)  | 917                  | 1.35<br>(1.27,1.44)              | 1.41<br>(1.00,1.98)  | 654                | 0.98<br>(0.91,1.06)              | 1.02<br>(0.79,1.32) | 961                      | 1.72<br>(1.61,1.83)              | 1.79<br>(0.82,3.89) |
| Brain Cancer        | 14             | 0.02<br>(0.01,0.04)              | 36           | 0.06 (0.04,0.08)                 | 2.47<br>(0.32,19.32) | 49                   | 0.07<br>(0.05,0.10)              | 3.25<br>(0.70,14.99) | 20                 | 0.03<br>(0.02,0.05)              | 1.35<br>(0.35,5.20) | 0                        | NA                               | NA                  |
| Lymphoma            | 267            | 0.41<br>(0.37,0.46)              | 209          | 0.32 (0.28,0.36)                 | 0.77<br>(0.38,1.55)  | 234                  | 0.34<br>(0.30,0.39)              | 0.83<br>(0.43,1.60)  | 288                | 0.43<br>(0.38,0.48)              | 1.04<br>(0.72,1.50) | 241                      | 0.42<br>(0.37,0.48)              | 1.04<br>(0.64,1.69) |
| <b>271-365 days</b> |                |                                  |              |                                  |                      |                      |                                  |                      |                    |                                  |                     |                          |                                  |                     |
| Lung Cancer         | 261            | 0.70<br>(0.62,0.79)              | 306          | 0.77 (0.69,0.86)                 | 1.20<br>(0.69,2.09)  | 334                  | 0.93<br>(0.83,1.03)              | 1.31<br>(0.75,2.29)  | 366                | 1.00<br>(0.90,1.11)              | 1.42<br>(1.02,1.99) | 162                      | 0.45<br>(0.39,0.52)              | 0.63<br>(0.33,1.19) |
| Brain Cancer        | 6              | 0.02<br>(0.01,0.03)              | 0            | NA                               | NA                   | 0                    | NA                               | NA                   | 0                  | NA                               | NA                  | 0                        | NA                               | NA                  |
| Lymphoma            | 140            | 0.38<br>(0.32,0.44)              | 207          | 0.52 (0.46,0.60)                 | 1.50<br>(0.70,3.20)  | 113                  | 0.32<br>(0.26,0.38)              | 0.83<br>(0.33,2.08)  | 115                | 0.31<br>(0.26,0.37)              | 0.83<br>(0.46,1.47) | 28                       | 0.07<br>(0.05,0.11)              | 0.20<br>(0.05,0.81) |

Note: CI: confidence interval, REF: Reference group; Major CVD: Major Cardiovascular Disease; Composite outcome of stroke, heart failure and coronary artery disease

Hazard Ratio (HR) and 95% Confidence Interval (95% CI) were estimated by Cox regression, HR >1 (or <1) indicates patients with COVID-19 had higher (lower) risk of sequelae compared to the non-COVID-19 control cohort

Un-vaccinated, Incomplete vaccinated, Fully Vaccinated and Received booster dose of COVID-19 vaccines refers to patients who have received 0 dose, 1 doses, 2 doses and ≥3 doses of BioNTech or CoronaVac COVID-19 vaccines, respectively

**Supplementary Table 13. Incidence rate and hazard ratio of clinical sequelae in COVID-19 and non-COVID-19 cohort after weighting during 0-30, 31-90, 91-180, 181-270, 271-365 days of SARS-CoV-2 infection (Patients aged over 65)**

| <b>0-30 days</b>                    |                       |                                         |              |                                         |                     |                             |                                         |                           |              |                                         |                     |              |                                         |                     |
|-------------------------------------|-----------------------|-----------------------------------------|--------------|-----------------------------------------|---------------------|-----------------------------|-----------------------------------------|---------------------------|--------------|-----------------------------------------|---------------------|--------------|-----------------------------------------|---------------------|
| <b>Clinical sequelae</b>            | <b>Controls (REF)</b> |                                         |              | <b>COVID-19</b>                         |                     |                             |                                         |                           |              |                                         |                     |              |                                         |                     |
|                                     | <b>Event</b>          | <b>Incidence per 1,000 person-years</b> | <b>Event</b> | <b>Unvaccinated</b>                     |                     | <b>Received single dose</b> |                                         | <b>Received two doses</b> |              | <b>Received booster dose(s)</b>         |                     |              |                                         |                     |
|                                     |                       |                                         |              | <b>Incidence per 1,000 person-years</b> | <b>Hazard ratio</b> | <b>Event</b>                | <b>Incidence per 1,000 person-years</b> | <b>Hazard ratio</b>       | <b>Event</b> | <b>Incidence per 1,000 person-years</b> | <b>Hazard ratio</b> | <b>Event</b> | <b>Incidence per 1,000 person-years</b> | <b>Hazard ratio</b> |
| Major CVD                           | 830                   | 10.92 (10.19,11.68)                     | 3,233        | 45.87 (44.31,47.47)                     | 4.15 (3.47,4.95)    | 2,655                       | 36.37 (35.00,37.77)                     | 3.31 (2.70,4.06)          | 2,456        | 32.73 (31.46,34.05)                     | 2.99 (2.53,3.53)    | 2,006        | 26.21 (25.08,27.38)                     | 2.40 (2.00,2.88)    |
| Stroke                              | 555                   | 6.53 (6.00,7.09)                        | 1,988        | 25.25 (24.15,26.37)                     | 3.81 (3.02,4.81)    | 1,734                       | 21.33 (20.35,22.35)                     | 3.24 (2.49,4.21)          | 1,716        | 20.51 (19.55,21.49)                     | 3.13 (2.53,3.86)    | 1,351        | 15.69 (14.86,16.54)                     | 2.40 (1.89,3.04)    |
| Myocardial infarction               | 190                   | 2.06 (1.79,2.37)                        | 1,249        | 14.19 (13.42,14.99)                     | 6.77 (5.06,9.05)    | 1,057                       | 11.79 (11.10,12.52)                     | 5.66 (4.06,7.91)          | 770          | 8.44 (7.87,9.06)                        | 4.08 (2.98,5.57)    | 704          | 7.58 (7.03,8.15)                        | 3.67 (2.64,5.10)    |
| Heart Failure                       | 225                   | 2.48 (2.17,2.82)                        | 746          | 8.61 (8.01,9.25)                        | 3.45 (2.49,4.79)    | 590                         | 6.69 (6.16,7.24)                        | 2.69 (1.82,3.97)          | 543          | 6.06 (5.56,6.58)                        | 2.44 (1.72,3.46)    | 313          | 3.42 (3.06,3.81)                        | 1.38 (0.86,2.20)    |
| Atrial fibrillation                 | 127                   | 1.42 (1.19,1.69)                        | 523          | 6.17 (5.65,6.71)                        | 4.30 (2.74,6.76)    | 475                         | 5.49 (5.02,6.01)                        | 3.85 (2.41,6.14)          | 384          | 4.36 (3.94,4.81)                        | 3.06 (2.00,4.67)    | 531          | 5.90 (5.41,6.41)                        | 4.14 (2.82,6.08)    |
| Coronary Artery Disease             | 285                   | 3.35 (2.97,3.75)                        | 1,252        | 15.27 (14.45,16.14)                     | 4.50 (3.42,5.93)    | 1,105                       | 13.29 (12.52,14.09)                     | 3.94 (2.88,5.40)          | 974          | 11.54 (10.83,12.28)                     | 3.44 (2.63,4.50)    | 854          | 10.02 (9.37,10.72)                      | 2.99 (2.25,3.99)    |
| Deep vein thrombosis                | 29                    | 0.31 (0.21,0.43)                        | 233          | 2.61 (2.29,2.96)                        | 8.47 (3.69,19.44)   | 146                         | 1.61 (1.37,1.89)                        | 5.24 (2.20,12.50)         | 90           | 0.97 (0.78,1.19)                        | 3.17 (1.27,7.91)    | 73           | 0.78 (0.62,0.97)                        | 2.54 (0.91,7.08)    |
| Cardiovascular mortality            | 967                   | 10.31 (9.67,10.97)                      | 4,043        | 45.01 (43.64,46.41)                     | 4.33 (3.70,5.06)    | 2,600                       | 28.52 (27.45,29.64)                     | 2.75 (2.26,3.35)          | 1,857        | 20.04 (19.14,20.96)                     | 1.94 (1.59,2.37)    | 1,055        | 11.15 (10.49,11.83)                     | 1.08 (0.82,1.42)    |
| Chronic pulmonary disease           | 74                    | 0.83 (0.65,1.03)                        | 226          | 3.20 (2.66,3.33)                        | 8.76 (1.71,5.99)    | 345                         | 3.99 (3.59,4.43)                        | 4.82 (2.66,8.71)          | 293          | 3.32 (2.96,3.72)                        | 4.01 (2.39,6.73)    | 135          | 1.49 (1.25,1.75)                        | 1.80 (0.95,3.41)    |
| Acute respiratory distress syndrome | 132                   | 1.42 (1.19,1.68)                        | 1,113        | 12.63 (11.91,13.39)                     | 8.76 (5.94,12.93)   | 643                         | 7.14 (6.60,7.71)                        | 4.98 (3.26,7.62)          | 370          | 4.05 (3.65,4.48)                        | 2.83 (1.87,4.30)    | 371          | 3.97 (3.58,4.39)                        | 2.78 (1.85,4.20)    |
| Seizure                             | 38                    | 0.41 (0.30,0.56)                        | 263          | 7.15 (2.98,2.64)                        | 1.72 (3.79,13.48)   | 155                         | 1.72 (1.47,2.01)                        | 4.15 (1.82,9.45)          | 107          | 1.16 (0.95,1.39)                        | 2.80 (1.28,6.14)    | 100          | 1.07 (0.88,1.30)                        | 2.59 (1.20,5.61)    |
| End-stage renal disease             | 38                    | 0.41 (0.30,0.56)                        | 186          | 5.07 (1.80,2.40)                        | 1.22 (1.55,16.59)   | 46                          | 0.50 (0.37,0.66)                        | 1.22 (0.27,5.57)          | 59           | 0.64 (0.49,0.81)                        | 1.56 (0.41,5.90)    | 15           | 0.16 (0.09,0.25)                        | 0.39 (0.07,2.13)    |
| Acute kidney injury                 | 74                    | 0.79 (0.63,0.99)                        | 555          | 7.87 (6.29,5.78)                        | 7.87 (5.09,12.16)   | 524                         | 5.83 (5.35,6.35)                        | 7.32 (4.46,12.01)         | 293          | 3.20 (2.85,3.58)                        | 4.02 (2.41,6.72)    | 358          | 3.82 (3.43,4.22)                        | 4.81 (2.82,8.19)    |
| Pancreatitis                        | 32                    | 0.34 (0.23,0.47)                        | 146          | 4.75 (1.63,1.39)                        | 4.75 (1.93,11.71)   | 76                          | 0.84 (0.67,1.05)                        | 2.46 (0.64,9.42)          | 83           | 0.90 (0.72,1.10)                        | 2.63 (1.05,6.62)    | 61           | 0.65 (0.50,0.83)                        | 1.91 (0.67,5.44)    |
| All-cause mortality                 | 4,738                 | 50.53 (49.10,51.98)                     | 62,225       | 692.83 (687.41,698.29)                  | 13.61 (12.84,14.43) | 35,557                      | 390.09 (386.05,394.16)                  | 7.69 (7.18,8.23)          | 19,395       | 209.30 (206.36,212.25)                  | 4.13 (3.84,4.45)    | 11,256       | 118.98 (116.80,121.19)                  | 2.35 (1.58,3.50)    |

Note: CI: confidence interval, REF: Reference group; Major CVD: Major Cardiovascular Disease; Composite outcome of stroke, heart failure and coronary artery disease

Hazard Ratio (HR) and 95% Confidence Interval (95% CI) were estimated by Cox regression, HR >1 (or <1) indicates patients with COVID-19 had higher (lower) risk of sequelae compared to the non-COVID-19 control cohort

Un-vaccinated, Incomplete vaccinated, Fully Vaccinated and Received booster dose of COVID-19 vaccines refers to patients who have received 0 dose, 1 doses, 2 doses and ≥3 doses of BioNTech or CoronaVac COVID-19 vaccines, respectively

**Supplementary Table 13. Incidence rate and hazard ratio of clinical sequelae in COVID-19 and non-COVID-19 cohort after weighting during 0-30, 31-90, 91-180, 181-270,271-365 days of SARS-CoV-2 infection (Patients aged over 65, continued)**

| 31-90 days                          |       |                                  | COVID-19     |                                  |                  |        |                                  |                  |       |                                  |                  |       |                                  |                  |                       |  |
|-------------------------------------|-------|----------------------------------|--------------|----------------------------------|------------------|--------|----------------------------------|------------------|-------|----------------------------------|------------------|-------|----------------------------------|------------------|-----------------------|--|
| Controls (REF)                      |       |                                  | Unvaccinated |                                  |                  |        | Incompletely vaccinated          |                  |       |                                  | Fully vaccinated |       |                                  |                  | Received booster dose |  |
| Clinical sequelae                   | Event | Incidence per 1,000 person-years | Event        | Incidence per 1,000 person-years | Hazard ratio     | Event  | Incidence per 1,000 person-years | Hazard ratio     | Event | Incidence per 1,000 person-years | Hazard ratio     | Event | Incidence per 1,000 person-years | Hazard ratio     |                       |  |
| Major CVD                           | 1,901 | 12.87 (12.30,13.45)              | 3,878        | 28.26 (27.37,29.15)              | 2.20 (1.85,2.61) | 2,980  | 20.88 (20.14,21.64)              | 1.62 (1.34,1.96) | 2,135 | 14.61 (14.00,15.24)              | 1.14 (0.97,1.34) | 2,578 | 17.50 (16.83,18.18)              | 1.36 (1.17,1.58) |                       |  |
| Stroke                              | 1,105 | 6.70 (6.31,7.10)                 | 1,821        | 11.87 (11.33,12.42)              | 1.77 (1.40,2.25) | 1,626  | 10.23 (9.74,10.74)               | 1.53 (1.18,1.98) | 1,158 | 7.12 (6.72,7.54)                 | 1.06 (0.85,1.32) | 1,143 | 6.92 (6.53,7.33)                 | 1.03 (0.83,1.28) |                       |  |
| Myocardial infarction               | 412   | 2.30 (2.08,2.53)                 | 903          | 5.26 (4.93,5.61)                 | 2.28 (1.64,3.19) | 459    | 2.62 (2.39,2.87)                 | 1.14 (0.71,1.83) | 397   | 2.24 (2.03,2.47)                 | 0.97 (0.67,1.41) | 474   | 2.66 (2.42,2.90)                 | 1.15 (0.81,1.65) |                       |  |
| Heart Failure                       | 619   | 3.51 (3.24,3.79)                 | 1,661        | 9.84 (9.38,10.33)                | 2.81 (2.21,3.56) | 980    | 5.68 (5.33,6.04)                 | 1.62 (1.22,2.16) | 947   | 5.43 (5.10,5.79)                 | 1.55 (1.20,2.01) | 1,046 | 5.94 (5.59,6.31)                 | 1.69 (1.30,2.20) |                       |  |
| Atrial fibrillation                 | 368   | 2.12 (1.91,2.35)                 | 787          | 4.76 (4.43,5.10)                 | 2.24 (1.60,3.13) | 525    | 3.10 (2.85,3.38)                 | 1.46 (0.94,2.26) | 470   | 2.74 (2.50,2.99)                 | 1.29 (0.91,1.82) | 415   | 2.40 (2.18,2.64)                 | 1.13 (0.75,1.70) |                       |  |
| Coronary Artery Disease             | 698   | 4.22 (3.92,4.54)                 | 1,693        | 10.59 (10.09,11.10)              | 2.51 (1.94,3.24) | 925    | 5.69 (5.33,6.07)                 | 1.35 (0.96,1.90) | 780   | 4.75 (4.43,5.10)                 | 1.13 (0.87,1.46) | 1,023 | 6.25 (5.88,6.64)                 | 1.48 (1.18,1.86) |                       |  |
| Deep vein thrombosis                | 71    | 0.39 (0.31,0.49)                 | 250          | 1.44 (1.27,1.62)                 | 3.66 (1.84,7.28) | 160    | 0.90 (0.77,1.05)                 | 2.30 (1.12,4.73) | 167   | 0.93 (0.79,1.08)                 | 2.37 (1.27,4.39) | 59    | 0.32 (0.25,0.41)                 | 0.83 (0.35,1.96) |                       |  |
| Cardiovascular mortality            | 1,121 | 6.17 (5.82,6.54)                 | 1,701        | 9.71 (9.26,10.18)                | 1.57 (1.29,1.91) | 1,207  | 6.78 (6.40,7.17)                 | 1.10 (0.84,1.43) | 1,127 | 6.26 (5.91,6.64)                 | 1.01 (0.80,1.29) | 580   | 3.20 (2.95,3.47)                 | 0.52 (0.37,0.73) |                       |  |
| Chronic pulmonary disease           | 192   | 1.10 (0.95,1.27)                 | 496          | 2.99 (2.73,3.26)                 | 2.71 (1.76,4.18) | 286    | 1.69 (1.50,1.89)                 | 1.53 (0.84,2.80) | 262   | 1.52 (1.34,1.71)                 | 1.38 (0.86,2.22) | 210   | 1.21 (1.05,1.38)                 | 1.10 (0.65,1.84) |                       |  |
| Acute respiratory distress syndrome | 341   | 1.90 (1.70,2.10)                 | 588          | 3.42 (3.15,3.70)                 | 1.80 (1.17,2.76) | 611    | 3.48 (3.21,3.76)                 | 1.83 (1.18,2.85) | 436   | 2.45 (2.23,2.69)                 | 1.29 (0.91,1.84) | 443   | 2.47 (2.24,2.70)                 | 1.30 (0.94,1.80) |                       |  |
| Seizure                             | 114   | 0.63 (0.53,0.76)                 | 306          | 1.78 (1.58,1.98)                 | 2.81 (1.46,5.40) | 203    | 1.15 (1.00,1.32)                 | 1.82 (0.78,4.26) | 195   | 1.09 (0.94,1.25)                 | 1.72 (0.94,3.18) | 66    | 0.36 (0.28,0.46)                 | 0.58 (0.24,1.40) |                       |  |
| End-stage renal disease             | 50    | 0.28 (0.21,0.36)                 | 44           | 0.25 (0.19,0.34)                 | 0.92 (0.35,2.41) | 65     | 0.37 (0.28,0.46)                 | 1.33 (0.44,3.98) | 36    | 0.20 (0.14,0.27)                 | 0.73 (0.22,2.44) | 0     | NA                               | NA               |                       |  |
| Acute kidney injury                 | 159   | 0.88 (0.76,1.03)                 | 417          | 2.42 (2.20,2.67)                 | 2.73 (1.76,4.24) | 385    | 2.19 (1.98,2.41)                 | 2.47 (1.43,4.28) | 193   | 1.08 (0.94,1.24)                 | 1.22 (0.71,2.12) | 184   | 1.02 (0.88,1.18)                 | 1.15 (0.63,2.11) |                       |  |
| Pancreatitis                        | 74    | 0.41 (0.32,0.51)                 | 243          | 1.39 (1.22,1.57)                 | 3.42 (1.58,7.41) | 128    | 0.72 (0.60,0.85)                 | 1.77 (0.78,4.05) | 115   | 0.64 (0.53,0.76)                 | 1.57 (0.73,3.41) | 94    | 0.52 (0.42,0.63)                 | 1.28 (0.61,2.69) |                       |  |
| All-cause mortality                 | 6,270 | 34.49 (33.65,35.36)              | 17,849       | 101.91 (100.42,103.41)           | 2.94 (2.75,3.15) | 10,316 | 57.93 (56.83,59.06)              | 1.68 (1.53,1.84) | 7,535 | 41.86 (40.93,42.82)              | 1.21 (1.11,1.33) | 5,551 | 30.64 (29.84,31.45)              | 0.89 (0.79,1.00) |                       |  |

Note: CI: confidence interval, REF: Reference group; Major CVD: Major Cardiovascular Disease; Composite outcome of stroke, heart failure and coronary artery disease  
Hazard Ratio (HR) and 95% Confidence Interval (95% CI) were estimated by Cox regression, HR >1 (or <1) indicates patients with COVID-19 had higher (lower) risk of sequelae compared to the non-COVID-19 control cohort  
Un-vaccinated, Incomplete vaccinated, Fully Vaccinated and Received booster dose of COVID-19 vaccines refers to patients who have received 0 dose, 1 doses, 2 doses and ≥3 doses of BioNtech or CoronaVac COVID-19 vaccines, respectively

**Supplementary Table 13. Incidence rate and hazard ratio of clinical sequelae in COVID-19 and non-COVID-19 cohort after weighting during 0-30, 31-90, 91-180, 181-270,271-365 days of SARS-CoV-2 infection (Patients aged over 65, continued)**

| 91-180 days                         |       |                                  | COVID-19     |                                  |                  |                         |                                  |                  |                  |                                  |                  |                       |                                  |                  |
|-------------------------------------|-------|----------------------------------|--------------|----------------------------------|------------------|-------------------------|----------------------------------|------------------|------------------|----------------------------------|------------------|-----------------------|----------------------------------|------------------|
| Controls (REF)                      |       |                                  | Unvaccinated |                                  |                  | Incompletely vaccinated |                                  |                  | Fully vaccinated |                                  |                  | Received booster dose |                                  |                  |
| Clinical sequelae                   | Event | Incidence per 1,000 person-years | Event        | Incidence per 1,000 person-years | Hazard ratio     | Event                   | Incidence per 1,000 person-years | Hazard ratio     | Event            | Incidence per 1,000 person-years | Hazard ratio     | Event                 | Incidence per 1,000 person-years | Hazard ratio     |
| Major CVD                           | 2,531 | 13.24 (12.73,13.76)              | 3,760        | 19.34 (18.73,19.96)              | 1.47 (1.23,1.75) | 3,207                   | 15.40 (14.87,15.94)              | 1.17 (0.97,1.40) | 3,046            | 14.78 (14.26,15.31)              | 1.12 (0.98,1.28) | 2,333                 | 14.87 (14.28,15.49)              | 1.11 (0.96,1.30) |
| Stroke                              | 1,520 | 7.13 (6.77,7.49)                 | 1,895        | 8.71 (8.32,9.10)                 | 1.22 (0.97,1.55) | 1,766                   | 7.61 (7.26,7.97)                 | 1.07 (0.83,1.37) | 1,750            | 7.64 (7.29,8.00)                 | 1.07 (0.90,1.28) | 1,160                 | 6.63 (6.26,7.03)                 | 0.93 (0.75,1.14) |
| Myocardial infarction               | 535   | 2.31 (2.12,2.51)                 | 911          | 3.73 (3.49,3.98)                 | 1.62 (1.14,2.30) | 661                     | 2.58 (2.39,2.78)                 | 1.12 (0.77,1.62) | 608              | 2.44 (2.25,2.63)                 | 1.06 (0.78,1.44) | 592                   | 3.15 (2.91,3.42)                 | 1.36 (0.98,1.90) |
| Heart Failure                       | 666   | 2.92 (2.70,3.14)                 | 1,360        | 5.67 (5.38,5.98)                 | 1.95 (1.52,2.50) | 1,127                   | 4.47 (4.22,4.74)                 | 1.54 (1.15,2.07) | 1,100            | 4.48 (4.23,4.76)                 | 1.54 (1.22,1.95) | 823                   | 4.43 (4.13,4.74)                 | 1.50 (1.13,2.01) |
| Atrial fibrillation                 | 509   | 2.27 (2.08,2.47)                 | 796          | 3.39 (3.16,3.63)                 | 1.49 (1.04,2.13) | 803                     | 3.25 (3.03,3.48)                 | 1.43 (1.02,2.01) | 719              | 2.98 (2.77,3.20)                 | 1.31 (1.00,1.72) | 550                   | 3.01 (2.77,3.27)                 | 1.34 (0.96,1.87) |
| Coronary Artery Disease             | 961   | 4.50 (4.22,4.79)                 | 1,659        | 7.30 (6.96,7.66)                 | 1.63 (1.24,2.14) | 1,306                   | 5.51 (5.21,5.81)                 | 1.23 (0.94,1.61) | 1,101            | 4.77 (4.49,5.06)                 | 1.06 (0.85,1.33) | 925                   | 5.36 (5.02,5.71)                 | 1.18 (0.93,1.51) |
| Deep vein thrombosis                | 86    | 0.37 (0.30,0.45)                 | 102          | 0.41 (0.34,0.50)                 | 1.12 (0.52,2.39) | 113                     | 0.43 (0.36,0.52)                 | 1.17 (0.47,2.93) | 68               | 0.27 (0.21,0.34)                 | 0.73 (0.31,1.73) | 62                    | 0.33 (0.25,0.42)                 | 0.91 (0.35,2.38) |
| Cardiovascular mortality            | 1,288 | 5.48 (5.18,5.78)                 | 1,674        | 6.72 (6.41,7.05)                 | 1.22 (1.00,1.50) | 1,130                   | 4.35 (4.10,4.61)                 | 0.79 (0.60,1.04) | 994              | 3.92 (3.69,4.17)                 | 0.72 (0.56,0.91) | 359                   | 1.88 (1.70,2.09)                 | 0.35 (0.22,0.55) |
| Chronic pulmonary disease           | 259   | 1.14 (1.01,1.29)                 | 553          | 2.35 (2.16,2.55)                 | 2.07 (1.30,3.30) | 376                     | 1.52 (1.38,1.68)                 | 1.35 (0.77,2.35) | 324              | 1.34 (1.20,1.49)                 | 1.18 (0.77,1.79) | 268                   | 1.47 (1.30,1.65)                 | 1.26 (0.78,2.03) |
| Acute respiratory distress syndrome | 484   | 2.08 (1.90,2.27)                 | 1,063        | 4.34 (4.09,4.61)                 | 2.09 (1.47,2.97) | 657                     | 2.56 (2.37,2.76)                 | 1.23 (0.81,1.88) | 705              | 2.82 (2.62,3.03)                 | 1.35 (1.02,1.79) | 293                   | 1.55 (1.38,1.73)                 | 0.74 (0.49,1.12) |
| Seizure                             | 163   | 0.70 (0.60,0.81)                 | 515          | 2.10 (1.93,2.29)                 | 3.03 (1.91,4.81) | 379                     | 1.47 (1.33,1.62)                 | 2.13 (1.25,3.60) | 211              | 0.84 (0.73,0.96)                 | 1.21 (0.70,2.06) | 109                   | 0.58 (0.48,0.69)                 | 0.81 (0.37,1.78) |
| End-stage renal disease             | 55    | 0.24 (0.18,0.31)                 | 57           | 0.23 (0.18,0.30)                 | 0.97 (0.36,2.60) | 89                      | 0.34 (0.28,0.42)                 | 1.44 (0.47,4.45) | 22               | 0.09 (0.05,0.13)                 | 0.36 (0.08,1.62) | 0                     | NA                               | NA               |
| Acute kidney injury                 | 273   | 1.17 (1.04,1.32)                 | 412          | 1.68 (1.52,1.85)                 | 1.44 (0.93,2.22) | 416                     | 1.62 (1.47,1.78)                 | 1.38 (0.88,2.18) | 383              | 1.53 (1.38,1.69)                 | 1.30 (0.88,1.93) | 70                    | 0.37 (0.29,0.46)                 | 0.31 (0.12,0.78) |
| Pancreatitis                        | 91    | 0.39 (0.32,0.48)                 | 106          | 0.43 (0.35,0.51)                 | 1.11 (0.48,2.54) | 119                     | 0.46 (0.38,0.55)                 | 1.21 (0.49,2.98) | 132              | 0.52 (0.44,0.62)                 | 1.36 (0.69,2.70) | 45                    | 0.24 (0.18,0.32)                 | 0.59 (0.21,1.63) |
| All-cause mortality                 | 8,231 | 35.00 (34.25,35.77)              | 13,987       | 56.17 (55.24,57.11)              | 1.61 (1.49,1.73) | 9,448                   | 36.34 (35.61,37.07)              | 1.04 (0.94,1.14) | 7,786            | 30.75 (30.08,31.44)              | 0.88 (0.80,0.96) | 3,911                 | 20.54 (19.91,21.20)              | 0.59 (0.51,0.67) |

Note: CI: confidence interval, REF: Reference group; Major CVD: Major Cardiovascular Disease; Composite outcome of stroke, heart failure and coronary artery disease  
Hazard Ratio (HR) and 95% Confidence Interval (95% CI) were estimated by Cox regression, HR >1 (or <1) indicates patients with COVID-19 had higher (lower) risk of sequelae compared to the non-COVID-19 control cohort  
Un-vaccinated, Incomplete vaccinated, Fully Vaccinated and Received booster dose of COVID-19 vaccines refers to patients who have received 0 dose, 1 doses, 2 doses and ≥3 doses of BioNtech or CoronaVac COVID-19 vaccines, respectively

**Supplementary Table 13. Incidence rate and hazard ratio of clinical sequelae in COVID-19 and non-COVID-19 cohort after weighting during 0-30, 31-90, 91-180, 181-270,271-365 days of SARS-CoV-2 infection (Patients aged over 65, continued)**

| 181-270 days                        |                |                                  |        |                                  |                  |                         |                                  |                  |                  |                                  |                  |                       |                                  |                  |
|-------------------------------------|----------------|----------------------------------|--------|----------------------------------|------------------|-------------------------|----------------------------------|------------------|------------------|----------------------------------|------------------|-----------------------|----------------------------------|------------------|
| Clinical sequelae                   | Controls (REF) |                                  |        | COVID-19                         |                  |                         |                                  |                  |                  |                                  |                  |                       |                                  |                  |
|                                     | Event          | Incidence per 1,000 person-years | Event  | Unvaccinated                     |                  | Incompletely vaccinated |                                  |                  | Fully vaccinated |                                  |                  | Received booster dose |                                  |                  |
|                                     |                |                                  | Event  | Incidence per 1,000 person-years | Hazard ratio     | Event                   | Incidence per 1,000 person-years | Hazard ratio     | Event            | Incidence per 1,000 person-years | Hazard ratio     | Event                 | Incidence per 1,000 person-years | Hazard ratio     |
| Major CVD                           | 2,094          | 13.82 (13.24,14.42)              | 2,917  | 19.56 (18.86,20.28)              | 1.42 (1.19,1.69) | 2,744                   | 17.52 (16.87,18.18)              | 1.27 (1.06,1.51) | 2,385            | 15.49 (14.88,16.12)              | 1.12 (0.97,1.29) | 1,628                 | 12.39 (11.81,13.01)              | 0.90 (0.70,1.16) |
| Stroke                              | 1,199          | 7.09 (6.70,7.50)                 | 1,749  | 10.49 (10.00,10.99)              | 1.48 (1.17,1.87) | 1,438                   | 8.24 (7.82,8.67)                 | 1.16 (0.91,1.48) | 1,356            | 7.92 (7.51,8.35)                 | 1.12 (0.92,1.35) | 947                   | 6.28 (5.89,6.69)                 | 0.89 (0.63,1.25) |
| Myocardial infarction               | 514            | 2.80 (2.56,3.05)                 | 607    | 3.24 (2.99,3.50)                 | 1.16 (0.82,1.63) | 706                     | 3.66 (3.40,3.94)                 | 1.31 (0.94,1.83) | 441              | 2.36 (2.15,2.59)                 | 0.85 (0.61,1.18) | 326                   | 2.03 (1.82,2.26)                 | 0.73 (0.38,1.41) |
| Heart Failure                       | 637            | 3.51 (3.24,3.79)                 | 1,187  | 6.45 (6.09,6.82)                 | 1.84 (1.44,2.34) | 1,047                   | 5.52 (5.19,5.86)                 | 1.57 (1.20,2.06) | 710              | 3.87 (3.59,4.16)                 | 1.10 (0.84,1.45) | 470                   | 2.91 (2.65,3.18)                 | 0.83 (0.48,1.41) |
| Atrial fibrillation                 | 415            | 2.33 (2.11,2.56)                 | 627    | 3.48 (3.21,3.76)                 | 1.50 (1.07,2.09) | 574                     | 3.09 (2.84,3.35)                 | 1.33 (0.91,1.95) | 666              | 3.68 (3.41,3.97)                 | 1.58 (1.19,2.10) | 294                   | 1.86 (1.65,2.08)                 | 0.79 (0.42,1.48) |
| Coronary Artery Disease             | 855            | 5.04 (4.71,5.38)                 | 1,086  | 6.23 (5.86,6.60)                 | 1.24 (0.94,1.63) | 1,106                   | 6.19 (5.84,6.57)                 | 1.23 (0.93,1.63) | 957              | 5.55 (5.20,5.91)                 | 1.10 (0.89,1.37) | 591                   | 4.07 (3.75,4.41)                 | 0.81 (0.55,1.19) |
| Deep vein thrombosis                | 68             | 0.36 (0.28,0.46)                 | 91     | 0.48 (0.39,0.59)                 | 1.32 (0.65,2.69) | 79                      | 0.40 (0.33,0.50)                 | 1.11 (0.46,2.68) | 90               | 0.48 (0.39,0.59)                 | 1.31 (0.61,2.82) | 23                    | 0.14 (0.09,0.21)                 | 0.39 (0.05,2.83) |
| Cardiovascular mortality            | 839            | 4.49 (4.20,4.81)                 | 1,221  | 6.39 (6.04,6.76)                 | 1.42 (1.12,1.81) | 882                     | 4.50 (4.21,4.80)                 | 1.01 (0.76,1.34) | 599              | 3.16 (2.92,3.42)                 | 0.70 (0.52,0.95) | 489                   | 2.97 (2.71,3.24)                 | 0.65 (0.33,1.28) |
| Chronic pulmonary disease           | 213            | 1.18 (1.03,1.35)                 | 434    | 2.40 (2.19,2.64)                 | 2.03 (1.32,3.11) | 414                     | 2.22 (2.02,2.44)                 | 1.87 (1.19,2.95) | 209              | 1.15 (1.00,1.31)                 | 0.97 (0.59,1.60) | 117                   | 0.75 (0.62,0.89)                 | 0.64 (0.30,1.37) |
| Acute respiratory distress syndrome | 371            | 2.01 (1.81,2.22)                 | 646    | 3.44 (3.18,3.71)                 | 1.71 (1.15,2.56) | 370                     | 1.91 (1.72,2.11)                 | 0.95 (0.60,1.50) | 298              | 1.59 (1.42,1.78)                 | 0.79 (0.53,1.18) | 107                   | 0.66 (0.54,0.79)                 | 0.33 (0.16,0.68) |
| Seizure                             | 140            | 0.76 (0.64,0.89)                 | 356    | 1.90 (1.71,2.10)                 | 2.52 (1.45,4.36) | 208                     | 1.07 (0.94,1.23)                 | 1.43 (0.75,2.73) | 114              | 0.60 (0.50,0.72)                 | 0.80 (0.38,1.69) | 42                    | 0.26 (0.19,0.35)                 | 0.34 (0.08,1.40) |
| End-stage renal disease             | 27             | 0.15 (0.10,0.21)                 | 49     | 0.26 (0.19,0.33)                 | 1.74 (0.57,5.29) | 60                      | 0.31 (0.24,0.40)                 | 2.10 (0.77,5.69) | 79               | 0.42 (0.34,0.52)                 | 2.84 (1.23,6.61) | 0                     | NA                               | NA               |
| Acute kidney injury                 | 222            | 1.20 (1.05,1.36)                 | 335    | 1.78 (1.60,1.98)                 | 1.49 (0.96,2.32) | 257                     | 1.33 (1.17,1.50)                 | 1.11 (0.64,1.92) | 245              | 1.30 (1.15,1.47)                 | 1.09 (0.66,1.81) | 90                    | 0.55 (0.44,0.67)                 | 0.46 (0.18,1.15) |
| Pancreatitis                        | 83             | 0.45 (0.36,0.55)                 | 110    | 0.58 (0.48,0.70)                 | 1.30 (0.65,2.59) | 80                      | 0.41 (0.33,0.50)                 | 0.92 (0.31,2.67) | 72               | 0.38 (0.30,0.48)                 | 0.86 (0.37,1.98) | 90                    | 0.55 (0.44,0.67)                 | 1.22 (0.24,6.18) |
| All-cause mortality                 | 6,696          | 35.84 (34.99,36.70)              | 10,208 | 53.41 (52.39,54.46)              | 1.49 (1.37,1.62) | 7,348                   | 37.51 (36.66,38.38)              | 1.05 (0.95,1.16) | 4,674            | 24.68 (23.98,25.40)              | 0.69 (0.62,0.77) | 2,967                 | 18.01 (17.37,18.67)              | 0.50 (0.39,0.65) |

Note: CI: confidence interval, REF: Reference group; Major CVD: Major Cardiovascular Disease; Composite outcome of stroke, heart failure and coronary artery disease  
Hazard Ratio (HR) and 95% Confidence Interval (95% CI) were estimated by Cox regression, HR >1 (or <1) indicates patients with COVID-19 had higher (lower) risk of sequelae compared to the non-COVID-19 control cohort  
Un-vaccinated, Incomplete vaccinated, Fully Vaccinated and Received booster dose of COVID-19 vaccines refers to patients who have received 0 dose, 1 doses, 2 doses and ≥3 doses of BioNtech or CoronaVac COVID-19 vaccines, respectively

**Supplementary Table 13. Incidence rate and hazard ratio of clinical sequelae in COVID-19 and non-COVID-19 cohort after weighting during 0-30, 31-90, 91-180, 181-270,271-365 days of SARS-CoV-2 infection (Patients aged over 65, continued)**

| 271-365 days                        |                |                                  |       |                                  |                  |                         |                                  |                  |                  |                                  |                  |                       |                                  |                   |
|-------------------------------------|----------------|----------------------------------|-------|----------------------------------|------------------|-------------------------|----------------------------------|------------------|------------------|----------------------------------|------------------|-----------------------|----------------------------------|-------------------|
| Clinical sequelae                   | Controls (REF) |                                  |       | COVID-19                         |                  |                         |                                  |                  |                  |                                  |                  |                       |                                  |                   |
|                                     | Event          | Incidence per 1,000 person-years | Event | Unvaccinated                     |                  | Incompletely vaccinated |                                  |                  | Fully vaccinated |                                  |                  | Received booster dose |                                  |                   |
|                                     |                |                                  | Event | Incidence per 1,000 person-years | Hazard ratio     | Event                   | Incidence per 1,000 person-years | Hazard ratio     | Event            | Incidence per 1,000 person-years | Hazard ratio     | Event                 | Incidence per 1,000 person-years | Hazard ratio      |
| Major CVD                           | 1,314          | 15.65 (14.82,16.51)              | 1,549 | 18.49 (17.58,19.42)              | 1.20 (0.95,1.53) | 1,302                   | 16.05 (15.20,16.94)              | 1.02 (0.79,1.32) | 1,279            | 15.55 (14.72,16.42)              | 0.99 (0.82,1.20) | 827                   | 9.97 (9.31,10.67)                | 0.63 (0.43,0.92)  |
| Stroke                              | 695            | 7.42 (6.89,7.99)                 | 739   | 7.93 (7.38,8.52)                 | 1.06 (0.76,1.48) | 563                     | 6.24 (5.75,6.78)                 | 0.84 (0.57,1.24) | 652              | 7.13 (6.60,7.69)                 | 0.96 (0.73,1.26) | 469                   | 4.72 (4.31,5.17)                 | 0.63 (0.38,1.06)  |
| Myocardial infarction               | 342            | 3.36 (3.01,3.73)                 | 333   | 3.21 (2.87,3.56)                 | 0.99 (0.62,1.57) | 383                     | 3.87 (3.49,4.27)                 | 1.14 (0.73,1.79) | 375              | 3.77 (3.40,4.17)                 | 1.12 (0.77,1.62) | 165                   | 1.57 (1.34,1.82)                 | 0.46 (0.13,1.60)  |
| Heart Failure                       | 469            | 4.66 (4.26,5.10)                 | 749   | 7.34 (6.82,7.87)                 | 1.63 (1.21,2.21) | 663                     | 6.79 (6.29,7.33)                 | 1.45 (1.06,1.97) | 624              | 6.38 (5.89,6.90)                 | 1.36 (1.02,1.82) | 303                   | 2.83 (2.53,3.17)                 | 0.60 (0.27,1.35)  |
| Atrial fibrillation                 | 233            | 2.35 (2.06,2.67)                 | 249   | 2.49 (2.20,2.82)                 | 1.10 (0.67,1.81) | 331                     | 3.46 (3.10,3.84)                 | 1.46 (0.88,2.41) | 253              | 2.63 (2.32,2.97)                 | 1.11 (0.71,1.74) | 1,334                 | 12.78 (12.10,13.48)              | 5.34 (1.14,25.01) |
| Coronary Artery Disease             | 521            | 5.55 (5.09,6.04)                 | 564   | 5.83 (5.37,6.34)                 | 1.07 (0.71,1.61) | 514                     | 5.60 (5.14,6.11)                 | 1.01 (0.67,1.50) | 453              | 4.93 (4.49,5.40)                 | 0.89 (0.64,1.22) | 362                   | 3.92 (3.53,4.34)                 | 0.70 (0.36,1.36)  |
| Deep vein thrombosis                | 45             | 0.43 (0.32,0.57)                 | 84    | 0.80 (0.64,0.98)                 | 1.92 (0.72,5.07) | 26                      | 0.26 (0.17,0.37)                 | 0.58 (0.14,2.43) | 24               | 0.24 (0.16,0.36)                 | 0.56 (0.17,1.84) | 0                     | NA                               | NA                |
| Cardiovascular mortality            | 80             | 0.78 (0.62,0.96)                 | 75    | 0.71 (0.56,0.88)                 | 0.84 (0.38,1.87) | 45                      | 0.45 (0.33,0.59)                 | 0.59 (0.18,1.89) | 8                | 0.08 (0.03,0.14)                 | 0.10 (0.01,0.73) | 0                     | NA                               | NA                |
| Chronic pulmonary disease           | 166            | 1.67 (1.43,1.94)                 | 219   | 2.18 (1.91,2.49)                 | 1.36 (0.73,2.52) | 241                     | 2.52 (2.22,2.86)                 | 1.49 (0.86,2.61) | 231              | 2.39 (2.09,2.71)                 | 1.43 (0.86,2.36) | 26                    | 0.25 (0.17,0.36)                 | 0.15 (0.03,0.66)  |
| Acute respiratory distress syndrome | 196            | 1.92 (1.67,2.20)                 | 230   | 2.22 (1.95,2.52)                 | 1.20 (0.66,2.19) | 317                     | 3.19 (2.86,3.56)                 | 1.65 (1.00,2.71) | 245              | 2.45 (2.16,2.78)                 | 1.27 (0.81,2.00) | 156                   | 1.44 (1.22,1.67)                 | 0.74 (0.34,1.60)  |
| Seizure                             | 66             | 0.64 (0.51,0.82)                 | 139   | 1.33 (1.12,1.57)                 | 2.14 (0.92,4.97) | 136                     | 1.36 (1.14,1.60)                 | 2.10 (1.00,4.43) | 43               | 0.43 (0.31,0.57)                 | 0.66 (0.26,1.69) | 73                    | 0.68 (0.53,0.85)                 | 1.03 (0.31,3.50)  |
| End-stage renal disease             | 22             | 0.21 (0.13,0.31)                 | 58    | 0.55 (0.42,0.70)                 | 2.73 (0.99,7.54) | 45                      | 0.44 (0.33,0.59)                 | 2.07 (0.59,7.21) | 0                | NA                               | NA               | 0                     | NA                               | NA                |
| Acute kidney injury                 | 114            | 1.12 (0.93,1.34)                 | 117   | 1.12 (0.93,1.34)                 | 1.04 (0.56,1.93) | 61                      | 0.62 (0.48,0.79)                 | 0.55 (0.19,1.56) | 66               | 0.66 (0.52,0.84)                 | 0.59 (0.23,1.50) | 397                   | 3.67 (3.32,4.04)                 | 3.16 (0.44,22.55) |
| Pancreatitis                        | 50             | 0.49 (0.37,0.64)                 | 66    | 0.63 (0.49,0.79)                 | 1.32 (0.53,3.32) | 25                      | 0.25 (0.17,0.37)                 | 0.52 (0.12,2.16) | 24               | 0.24 (0.15,0.34)                 | 0.48 (0.15,1.57) | 0                     | NA                               | NA                |
| All-cause mortality                 | 3,738          | 36.17 (35.02,37.33)              | 6,210 | 58.77 (57.33,60.25)              | 1.67 (1.50,1.85) | 3,208                   | 31.90 (30.81,33.02)              | 0.88 (0.76,1.01) | 2,941            | 29.23 (28.19,30.30)              | 0.80 (0.70,0.93) | 986                   | 9.04 (8.48,9.61)                 | 0.25 (0.16,0.38)  |

Note: CI: confidence interval, REF: Reference group; Major CVD: Major Cardiovascular Disease; Composite outcome of stroke, heart failure and coronary artery disease  
Hazard Ratio (HR) and 95% Confidence Interval (95% CI) were estimated by Cox regression, HR >1 (or <1) indicates patients with COVID-19 had higher (lower) risk of sequelae compared to the non-COVID-19 control cohort  
Un-vaccinated, Incomplete vaccinated, Fully Vaccinated and Received booster dose of COVID-19 vaccines refers to patients who have received 0 dose, 1 doses, 2 doses and ≥3 doses of BioNtech or CoronaVac COVID-19 vaccines, respectively

**Supplementary Table 14. Incidence rate and hazard ratio of clinical sequelae in COVID-19 and non-COVID-19 cohort after weighting during 0-30, 31-90, 91-180, 181-270, 271-365 days of SARS-CoV-2 infection (Patients aged 65 or under)**

| <b>0-30 days</b>                    |                |                                  |        |                                  |                  |                         |                                  |                  |                  |                                  |                  |                       |                                  |                  |
|-------------------------------------|----------------|----------------------------------|--------|----------------------------------|------------------|-------------------------|----------------------------------|------------------|------------------|----------------------------------|------------------|-----------------------|----------------------------------|------------------|
| Clinical sequelae                   | Controls (REF) |                                  |        | COVID-19                         |                  |                         |                                  |                  |                  |                                  |                  |                       |                                  |                  |
|                                     | Event          | Incidence per 1,000 person-years | Event  | Unvaccinated                     |                  | Incompletely vaccinated |                                  |                  | Fully vaccinated |                                  |                  | Received booster dose |                                  |                  |
|                                     |                |                                  | Event  | Incidence per 1,000 person-years | Hazard ratio     | Event                   | Incidence per 1,000 person-years | Hazard ratio     | Event            | Incidence per 1,000 person-years | Hazard ratio     | Event                 | Incidence per 1,000 person-years | Hazard ratio     |
| Major CVD                           | 830            | 10.92 (10.19,11.68)              | 3,233  | 45.87 (44.31,47.47)              | 4.15 (3.47,4.95) | 2,655                   | 36.37 (35.00,37.77)              | 3.31 (2.70,4.06) | 2,456            | 32.73 (31.46,34.05)              | 2.99 (2.53,3.53) | 2,006                 | 26.21 (25.08,27.38)              | 2.40 (2.00,2.88) |
| Stroke                              | 555            | 6.53 (6.00,7.09)                 | 1,988  | 25.25 (24.15,26.37)              | 3.81 (3.02,4.81) | 1,734                   | 21.33 (20.35,22.35)              | 3.24 (2.49,4.21) | 1,716            | 20.51 (19.55,21.49)              | 3.13 (2.53,3.86) | 1,351                 | 15.69 (14.86,16.54)              | 2.40 (1.89,3.04) |
| Myocardial infarction               | 190            | 2.06 (1.79,2.37)                 | 1,249  | 14.19 (13.42,14.99)              | 6.77 (5.06,9.05) | 1,057                   | 11.79 (11.10,12.52)              | 5.66 (4.06,7.91) | 770              | 8.44 (7.87,9.06)                 | 4.08 (2.98,5.57) | 704                   | 7.58 (7.03,8.15)                 | 3.67 (2.64,5.10) |
| Heart Failure                       | 225            | 2.48 (2.17,2.82)                 | 746    | 8.61 (8.01,9.25)                 | 3.45 (2.49,4.79) | 590                     | 6.69 (6.16,7.24)                 | 2.69 (1.82,3.97) | 543              | 6.06 (5.56,6.58)                 | 2.44 (1.72,3.46) | 313                   | 3.42 (3.06,3.81)                 | 1.38 (0.86,2.20) |
| Atrial fibrillation                 | 127            | 1.42 (1.19,1.69)                 | 523    | 6.17 (5.65,6.71)                 | 4.30 (2.74,6.76) | 475                     | 5.49 (5.02,6.01)                 | 3.85 (2.41,6.14) | 384              | 4.36 (3.94,4.81)                 | 3.06 (2.00,4.67) | 531                   | 5.90 (5.41,6.41)                 | 4.14 (2.82,6.08) |
| Coronary Artery Disease             | 285            | 3.35 (2.97,3.75)                 | 1,252  | 15.27 (14.45,16.14)              | 4.50 (3.42,5.93) | 1,105                   | 13.29 (12.52,14.09)              | 3.94 (2.88,5.40) | 974              | 11.54 (10.83,12.28)              | 3.44 (2.63,4.50) | 854                   | 10.02 (9.37,10.72)               | 2.99 (2.25,3.99) |
| Deep vein thrombosis                | 29             | 0.31 (0.21,0.43)                 | 233    | 4.87 (2.29,2.96)                 | (3.69,19.44)     | 146                     | 5.24 (1.61 (1.37,1.89)           | (2.20,12.50)     | 90               | 0.97 (0.78,1.19)                 | 3.17 (1.27,7.91) | 73                    | 0.78 (0.62,0.97)                 | 2.54 (0.91,7.08) |
| Cardiovascular mortality            | 967            | 10.31 (9.67,10.97)               | 4,043  | 45.01 (43.64,46.41)              | 4.33 (3.70,5.06) | 2,600                   | 28.52 (27.45,29.64)              | 2.75 (2.26,3.35) | 1,857            | 20.04 (19.14,20.96)              | 1.94 (1.59,2.37) | 1,055                 | 11.15 (10.49,11.83)              | 1.08 (0.82,1.42) |
| Chronic pulmonary disease           | 74             | 0.83 (0.65,1.03)                 | 226    | 8.76 (2.33,3.03)                 | 3.20 (1.71,5.99) | 345                     | 7.15 (3.99 (3.59,4.43)           | 4.82 (2.66,8.71) | 293              | 5.07 (3.32 (2.96,3.72)           | 4.01 (2.39,6.73) | 135                   | 1.49 (1.25,1.75)                 | 1.80 (0.95,3.41) |
| Acute respiratory distress syndrome | 132            | 1.42 (1.19,1.68)                 | 1,113  | 7.15 (11.91,13.39)               | (5.94,12.93)     | 643                     | 7.15 (6.60,7.71)                 | 4.98 (3.26,7.62) | 370              | 4.05 (3.65,4.48)                 | 2.83 (1.87,4.30) | 371                   | 3.97 (3.58,4.39)                 | 2.78 (1.85,4.20) |
| Seizure                             | 38             | 0.41 (0.30,0.56)                 | 263    | 5.07 (2.98 (2.64,3.36)           | (3.79,13.48)     | 155                     | 1.72 (1.47,2.01)                 | 4.15 (1.82,9.45) | 107              | 1.16 (0.95,1.39)                 | 2.80 (1.28,6.14) | 100                   | 1.07 (0.88,1.30)                 | 2.59 (1.20,5.61) |
| End-stage renal disease             | 38             | 0.41 (0.30,0.56)                 | 186    | 7.87 (2.08 (1.80,2.40)           | (1.55,16.59)     | 46                      | 0.50 (0.37,0.66)                 | 1.22 (0.27,5.57) | 59               | 0.64 (0.49,0.81)                 | 1.56 (0.41,5.90) | 15                    | 0.16 (0.09,0.25)                 | 0.39 (0.07,2.13) |
| Acute kidney injury                 | 74             | 0.79 (0.63,0.99)                 | 555    | 4.75 (6.29 (5.78,6.82)           | (5.09,12.16)     | 524                     | 5.83 (5.35,6.35)                 | (4.46,12.01)     | 293              | 3.20 (2.85,3.58)                 | 4.02 (2.41,6.72) | 358                   | 3.82 (3.43,4.22)                 | 4.81 (2.82,8.19) |
| Pancreatitis                        | 32             | 0.34 (0.23,0.47)                 | 146    | 13.61 (1.63 (1.39,1.92)          | (1.93,11.71)     | 76                      | 0.84 (0.67,1.05)                 | 2.46 (0.64,9.42) | 83               | 0.90 (0.72,1.10)                 | 2.63 (1.05,6.62) | 61                    | 0.65 (0.50,0.83)                 | 1.91 (0.67,5.44) |
| All-cause mortality                 | 4,738          | 50.53 (49.10,51.98)              | 62,225 | 692.83 (687.41,698.29)           | (12.84,14.43)    | 35,557                  | 390.09 (386.05,394.16)           | 7.69 (7.18,8.23) | 19,395           | 209.30 (206.36,212.25)           | 4.13 (3.84,4.45) | 11,256                | 118.98 (116.80,121.19)           | 2.35 (1.58,3.50) |

Note: CI: confidence interval, REF: Reference group; Major CVD: Major Cardiovascular Disease; Composite outcome of stroke, heart failure and coronary artery disease  
Hazard Ratio (HR) and 95% Confidence Interval (95% CI) were estimated by Cox regression, HR >1 (or <1) indicates patients with COVID-19 had higher (lower) risk of sequelae compared to the non-COVID-19 control cohort  
Un-vaccinated, Incomplete vaccinated, Fully Vaccinated and Received booster dose of COVID-19 vaccines refers to patients who have received 0 dose, 1 doses, 2 doses and ≥3 doses of BioNtech or CoronaVac COVID-19 vaccines, respectively

**Supplementary Table 14. Incidence rate and hazard ratio of clinical sequelae in COVID-19 and non-COVID-19 cohort after weighting during 0-30, 31-90, 91-180, 181-270, 271-365 days of SARS-CoV-2 infection (Patients aged 65 or under; continued)**

| 31-90 days                          |       |                                  | COVID-19     |                                  |                   |                         |                                  |                   |                  |                                  |                  |                       |                                  |                  |
|-------------------------------------|-------|----------------------------------|--------------|----------------------------------|-------------------|-------------------------|----------------------------------|-------------------|------------------|----------------------------------|------------------|-----------------------|----------------------------------|------------------|
| Controls (REF)                      |       |                                  | Unvaccinated |                                  |                   | Incompletely vaccinated |                                  |                   | Fully vaccinated |                                  |                  | Received booster dose |                                  |                  |
| Clinical sequelae                   | Event | Incidence per 1,000 person-years | Event        | Incidence per 1,000 person-years | Hazard ratio      | Event                   | Incidence per 1,000 person-years | Hazard ratio      | Event            | Incidence per 1,000 person-years | Hazard ratio     | Event                 | Incidence per 1,000 person-years | Hazard ratio     |
| Major CVD                           | 1,225 | 2.78 (2.63,2.94)                 | 1,571        | 3.64 (3.46,3.82)                 | 1.31 (0.93,1.84)  | 1,152                   | 2.65 (2.50,2.81)                 | 0.95 (0.63,1.44)  | 1,213            | 2.76 (2.60,2.92)                 | 0.99 (0.83,1.18) | 1,240                 | 2.81 (2.66,2.97)                 | 1.01 (0.82,1.25) |
| Stroke                              | 670   | 1.49 (1.38,1.61)                 | 836          | 1.90 (1.78,2.04)                 | 1.27 (0.78,2.08)  | 646                     | 1.46 (1.35,1.58)                 | 0.98 (0.56,1.69)  | 626              | 1.40 (1.29,1.51)                 | 0.94 (0.73,1.20) | 598                   | 1.33 (1.23,1.44)                 | 0.89 (0.62,1.28) |
| Myocardial infarction               | 296   | 0.65 (0.58,0.73)                 | 137          | 0.31 (0.26,0.36)                 | 0.47 (0.16,1.35)  | 190                     | 0.42 (0.37,0.49)                 | 0.65 (0.21,2.03)  | 316              | 0.70 (0.63,0.78)                 | 1.07 (0.75,1.53) | 262                   | 0.58 (0.51,0.65)                 | 0.89 (0.61,1.29) |
| Heart Failure                       | 115   | 0.25 (0.21,0.30)                 | 248          | 0.56 (0.49,0.63)                 | 2.20 (1.05,4.60)  | 56                      | 0.12 (0.09,0.16)                 | 0.49 (0.12,2.05)  | 119              | 0.26 (0.22,0.31)                 | 1.04 (0.60,1.82) | 101                   | 0.22 (0.18,0.27)                 | 0.88 (0.46,1.69) |
| Atrial fibrillation                 | 105   | 0.23 (0.19,0.28)                 | 269          | 0.60 (0.54,0.68)                 | 2.59 (1.10,6.13)  | 123                     | 0.27 (0.23,0.33)                 | 1.18 (0.42,3.30)  | 170              | 0.38 (0.32,0.44)                 | 1.61 (0.98,2.66) | 147                   | 0.32 (0.28,0.38)                 | 1.39 (0.86,2.27) |
| Coronary Artery Disease             | 534   | 1.19 (1.10,1.30)                 | 726          | 1.64 (1.53,1.77)                 | 1.38 (0.86,2.21)  | 600                     | 1.36 (1.25,1.47)                 | 1.14 (0.64,2.01)  | 569              | 1.28 (1.18,1.39)                 | 1.07 (0.82,1.40) | 633                   | 1.42 (1.31,1.53)                 | 1.19 (0.93,1.52) |
| Deep vein thrombosis                | 47    | 0.10 (0.08,0.14)                 | 165          | 0.37 (0.32,0.43)                 | 3.59 (1.12,11.50) | 33                      | 0.07 (0.05,0.10)                 | 0.72 (0.10,5.29)  | 73               | 0.16 (0.13,0.20)                 | 1.56 (0.74,3.31) | 41                    | 0.09 (0.07,0.12)                 | 0.88 (0.37,2.12) |
| Cardiovascular mortality            | 243   | 0.54 (0.47,0.61)                 | 148          | 0.33 (0.28,0.39)                 | 0.62 (0.22,1.76)  | 147                     | 0.33 (0.28,0.38)                 | 0.61 (0.24,1.56)  | 137              | 0.30 (0.26,0.36)                 | 0.57 (0.34,0.95) | 125                   | 0.28 (0.23,0.33)                 | 0.51 (0.31,0.86) |
| Chronic pulmonary disease           | 117   | 0.26 (0.21,0.31)                 | 354          | 0.80 (0.72,0.88)                 | 3.08 (1.40,6.74)  | 285                     | 0.64 (0.57,0.72)                 | 2.48 (1.06,5.79)  | 130              | 0.29 (0.24,0.34)                 | 1.12 (0.65,1.93) | 80                    | 0.18 (0.14,0.22)                 | 0.69 (0.37,1.26) |
| Acute respiratory distress syndrome | 199   | 0.44 (0.38,0.50)                 | 392          | 0.88 (0.80,0.97)                 | 2.00 (0.97,4.15)  | 277                     | 0.62 (0.55,0.70)                 | 1.41 (0.64,3.13)  | 179              | 0.40 (0.34,0.46)                 | 0.90 (0.57,1.43) | 203                   | 0.45 (0.39,0.51)                 | 1.02 (0.63,1.66) |
| Seizure                             | 183   | 0.40 (0.35,0.47)                 | 375          | 0.85 (0.76,0.94)                 | 2.10 (1.06,4.16)  | 342                     | 0.77 (0.69,0.85)                 | 1.90 (0.91,3.96)  | 157              | 0.35 (0.30,0.41)                 | 0.86 (0.54,1.38) | 120                   | 0.27 (0.22,0.32)                 | 0.66 (0.37,1.18) |
| End-stage renal disease             | 16    | 0.04 (0.02,0.06)                 | 39           | 0.09 (0.06,0.12)                 | 2.47 (0.32,19.17) | 82                      | 0.18 (0.15,0.23)                 | 5.18 (0.88,30.38) | 25               | 0.06 (0.04,0.08)                 | 1.56 (0.43,5.67) | 20                    | 0.04 (0.03,0.07)                 | 1.24 (0.35,4.46) |
| Acute kidney injury                 | 46    | 0.10 (0.08,0.14)                 | 127          | 0.28 (0.24,0.34)                 | 2.80 (0.84,9.29)  | 67                      | 0.15 (0.12,0.19)                 | 1.46 (0.44,4.87)  | 55               | 0.12 (0.09,0.16)                 | 1.19 (0.49,2.89) | 76                    | 0.17 (0.13,0.21)                 | 1.64 (0.67,4.00) |
| Pancreatitis                        | 73    | 0.16 (0.13,0.20)                 | 234          | 0.52 (0.46,0.59)                 | 3.26 (1.31,8.09)  | 118                     | 0.26 (0.22,0.31)                 | 1.63 (0.49,5.46)  | 47               | 0.10 (0.08,0.14)                 | 0.65 (0.28,1.53) | 84                    | 0.18 (0.15,0.23)                 | 1.15 (0.61,2.18) |
| All-cause mortality                 | 1,599 | 3.52 (3.35,3.69)                 | 3,165        | 7.06 (6.81,7.30)                 | 2.01 (1.62,2.48)  | 1,312                   | 2.92 (2.76,3.08)                 | 0.83 (0.58,1.18)  | 988              | 2.18 (2.05,2.32)                 | 0.62 (0.51,0.75) | 972                   | 2.14 (2.01,2.28)                 | 0.61 (0.47,0.79) |

Note: CI: confidence interval, REF: Reference group; Major CVD: Major Cardiovascular Disease; Composite outcome of stroke, heart failure and coronary artery disease  
Hazard Ratio (HR) and 95% Confidence Interval (95% CI) were estimated by Cox regression, HR >1 (or <1) indicates patients with COVID-19 had higher (lower) risk of sequelae compared to the non-COVID-19 control cohort  
Un-vaccinated, Incomplete vaccinated, Fully Vaccinated and Received booster dose of COVID-19 vaccines refers to patients who have received 0 dose, 1 doses, 2 doses and ≥3 doses of BioNtech or CoronaVac COVID-19 vaccines, respectively



**Supplementary Table 14. Incidence rate and hazard ratio of clinical sequelae in COVID-19 and non-COVID-19 cohort after weighting during 0-30, 31-90, 91-180, 181-270, 271-365 days of SARS-CoV-2 infection (Patients aged 65 or under; continued)**

| 91-180 days                         |                |                                  |       |                                  |                   |       |                                  |                   |       |                                  |                  |       |                                  |                  |
|-------------------------------------|----------------|----------------------------------|-------|----------------------------------|-------------------|-------|----------------------------------|-------------------|-------|----------------------------------|------------------|-------|----------------------------------|------------------|
| Clinical sequelae                   | Controls (REF) |                                  |       | COVID-19                         |                   |       |                                  |                   |       |                                  |                  |       |                                  |                  |
|                                     | Event          | Incidence per 1,000 person-years |       | Unvaccinated                     |                   |       | Incompletely vaccinated          |                   |       | Fully vaccinated                 |                  |       | Received booster dose            |                  |
|                                     |                |                                  | Event | Incidence per 1,000 person-years | Hazard ratio      | Event | Incidence per 1,000 person-years | Hazard ratio      | Event | Incidence per 1,000 person-years | Hazard ratio     | Event | Incidence per 1,000 person-years | Hazard ratio     |
| Major CVD                           | 1,699          | 2.99 (2.85,3.13)                 | 2,647 | 4.42 (4.26,4.59)                 | 1.49 (1.13,1.95)  | 2,415 | 3.81 (3.66,3.97)                 | 1.29 (0.97,1.70)  | 1,744 | 2.76 (2.64,2.90)                 | 0.93 (0.80,1.08) | 1,100 | 2.27 (2.14,2.41)                 | 0.75 (0.64,0.89) |
| Stroke                              | 938            | 1.62 (1.52,1.73)                 | 1,180 | 1.94 (1.83,2.05)                 | 1.20 (0.80,1.81)  | 1,337 | 2.08 (1.97,2.19)                 | 1.30 (0.89,1.89)  | 926   | 1.44 (1.35,1.54)                 | 0.90 (0.73,1.10) | 497   | 1.01 (0.92,1.10)                 | 0.61 (0.48,0.78) |
| Myocardial infarction               | 384            | 0.66 (0.59,0.72)                 | 465   | 0.75 (0.68,0.82)                 | 1.14 (0.59,2.21)  | 436   | 0.67 (0.61,0.73)                 | 1.01 (0.52,1.96)  | 342   | 0.53 (0.47,0.59)                 | 0.80 (0.57,1.12) | 319   | 0.64 (0.58,0.72)                 | 0.99 (0.72,1.35) |
| Heart Failure                       | 171            | 0.29 (0.25,0.34)                 | 505   | 0.81 (0.75,0.89)                 | 2.82 (1.54,5.19)  | 251   | 0.38 (0.34,0.44)                 | 1.35 (0.52,3.51)  | 240   | 0.37 (0.33,0.42)                 | 1.29 (0.86,1.95) | 58    | 0.12 (0.09,0.15)                 | 0.39 (0.19,0.81) |
| Atrial fibrillation                 | 163            | 0.28 (0.24,0.33)                 | 98    | 0.16 (0.13,0.19)                 | 0.57 (0.16,2.00)  | 172   | 0.26 (0.23,0.31)                 | 0.95 (0.38,2.37)  | 254   | 0.39 (0.35,0.44)                 | 1.40 (0.94,2.10) | 266   | 0.54 (0.48,0.60)                 | 1.91 (0.94,3.88) |
| Coronary Artery Disease             | 737            | 1.28 (1.19,1.37)                 | 1,170 | 1.91 (1.80,2.02)                 | 1.49 (1.00,2.22)  | 1,096 | 1.70 (1.60,1.81)                 | 1.33 (0.90,1.97)  | 769   | 1.20 (1.12,1.29)                 | 0.94 (0.75,1.17) | 600   | 1.22 (1.13,1.32)                 | 0.96 (0.76,1.21) |
| Deep vein thrombosis                | 63             | 0.11 (0.08,0.14)                 | 86    | 0.14 (0.11,0.17)                 | 1.30 (0.38,4.42)  | 217   | 0.33 (0.29,0.38)                 | 3.14 (1.21,8.11)  | 30    | 0.05 (0.03,0.07)                 | 0.44 (0.16,1.26) | 42    | 0.08 (0.06,0.11)                 | 0.77 (0.32,1.82) |
| Cardiovascular mortality            | 301            | 0.51 (0.46,0.57)                 | 675   | 1.08 (1.01,1.17)                 | 2.11 (1.31,3.38)  | 421   | 0.64 (0.58,0.71)                 | 1.25 (0.64,2.42)  | 245   | 0.38 (0.33,0.43)                 | 0.73 (0.49,1.10) | 98    | 0.20 (0.16,0.24)                 | 0.38 (0.19,0.79) |
| Chronic pulmonary disease           | 174            | 0.30 (0.26,0.35)                 | 341   | 0.56 (0.50,0.62)                 | 1.86 (0.87,3.96)  | 469   | 0.72 (0.66,0.79)                 | 2.42 (1.27,4.63)  | 240   | 0.37 (0.33,0.42)                 | 1.25 (0.84,1.86) | 150   | 0.30 (0.26,0.36)                 | 1.01 (0.63,1.61) |
| Acute respiratory distress syndrome | 233            | 0.40 (0.35,0.45)                 | 490   | 0.79 (0.72,0.86)                 | 1.97 (1.05,3.70)  | 379   | 0.58 (0.53,0.64)                 | 1.44 (0.72,2.88)  | 324   | 0.50 (0.45,0.56)                 | 1.24 (0.87,1.77) | 214   | 0.43 (0.37,0.49)                 | 1.10 (0.74,1.64) |
| Seizure                             | 226            | 0.39 (0.34,0.44)                 | 495   | 0.81 (0.74,0.88)                 | 2.11 (1.16,3.84)  | 520   | 0.80 (0.74,0.87)                 | 2.12 (1.13,3.95)  | 206   | 0.32 (0.28,0.36)                 | 0.83 (0.56,1.25) | 135   | 0.27 (0.23,0.32)                 | 0.68 (0.38,1.23) |
| End-stage renal disease             | 22             | 0.04 (0.02,0.06)                 | 63    | 0.10 (0.08,0.13)                 | 2.75 (0.38,19.97) | 84    | 0.13 (0.10,0.16)                 | 3.57 (0.76,16.79) | 18    | 0.03 (0.02,0.04)                 | 0.74 (0.17,3.30) | 0     | NA                               | NA               |
| Acute kidney injury                 | 85             | 0.15 (0.12,0.18)                 | 166   | 0.27 (0.23,0.31)                 | 1.84 (0.61,5.50)  | 38    | 0.06 (0.04,0.08)                 | 0.40 (0.05,2.93)  | 64    | 0.10 (0.08,0.12)                 | 0.68 (0.32,1.45) | 70    | 0.14 (0.11,0.18)                 | 0.95 (0.43,2.10) |
| Pancreatitis                        | 90             | 0.15 (0.12,0.19)                 | 64    | 0.10 (0.08,0.13)                 | 0.66 (0.15,2.84)  | 66    | 0.10 (0.08,0.13)                 | 0.63 (0.09,4.53)  | 66    | 0.10 (0.08,0.13)                 | 0.64 (0.30,1.36) | 57    | 0.11 (0.09,0.15)                 | 0.80 (0.38,1.68) |
| All-cause mortality                 | 1,907          | 3.25 (3.11,3.40)                 | 4,137 | 6.65 (6.45,6.86)                 | 2.05 (1.69,2.47)  | 2,058 | 3.14 (3.01,3.28)                 | 0.97 (0.73,1.28)  | 1,111 | 1.71 (1.61,1.81)                 | 0.53 (0.44,0.63) | 1,160 | 2.33 (2.20,2.47)                 | 0.72 (0.55,0.92) |

Note: CI: confidence interval, REF: Reference group; Major CVD: Major Cardiovascular Disease; Composite outcome of stroke, heart failure and coronary artery disease  
Hazard Ratio (HR) and 95% Confidence Interval (95% CI) were estimated by Cox regression, HR >1 (or <1) indicates patients with COVID-19 had higher (lower) risk of sequelae compared to the non-COVID-19 control cohort  
Un-vaccinated, Incomplete vaccinated, Fully Vaccinated and Received booster dose of COVID-19 vaccines refers to patients who have received 0 dose, 1 doses, 2 doses and ≥3 doses of BioNtech or CoronaVac COVID-19 vaccines, respectively

**Supplementary Table 14. Incidence rate and hazard ratio of clinical sequelae in COVID-19 and non-COVID-19 cohort after weighting during 0-30, 31-90, 91-180, 181-270, 271-365 days of SARS-CoV-2 infection (Patients aged 65 or under; continued)**

| 181-270 days                        |                |                                  |       |                                  |                  |                         |                                  |                  |                  |                                  |                  |                       |                                  |                  |
|-------------------------------------|----------------|----------------------------------|-------|----------------------------------|------------------|-------------------------|----------------------------------|------------------|------------------|----------------------------------|------------------|-----------------------|----------------------------------|------------------|
| Clinical sequelae                   | Controls (REF) |                                  |       | COVID-19                         |                  |                         |                                  |                  |                  |                                  |                  |                       |                                  |                  |
|                                     | Event          | Incidence per 1,000 person-years | Event | Unvaccinated                     |                  | Incompletely vaccinated |                                  |                  | Fully vaccinated |                                  |                  | Received booster dose |                                  |                  |
|                                     |                |                                  | Event | Incidence per 1,000 person-years | Hazard ratio     | Event                   | Incidence per 1,000 person-years | Hazard ratio     | Event            | Incidence per 1,000 person-years | Hazard ratio     | Event                 | Incidence per 1,000 person-years | Hazard ratio     |
| Major CVD                           | 1,365          | 3.06 (2.90,3.23)                 | 1,778 | 3.92 (3.74,4.11)                 | 1.28 (0.94,1.75) | 1,821                   | 3.88 (3.70,4.06)                 | 1.27 (0.94,1.71) | 1,304            | 2.80 (2.65,2.95)                 | 0.91 (0.78,1.07) | 1,066                 | 2.78 (2.62,2.95)                 | 0.91 (0.73,1.14) |
| Stroke                              | 729            | 1.61 (1.49,1.72)                 | 972   | 2.11 (1.98,2.24)                 | 1.31 (0.86,1.99) | 731                     | 1.53 (1.42,1.65)                 | 0.95 (0.60,1.52) | 651              | 1.37 (1.27,1.48)                 | 0.86 (0.69,1.07) | 503                   | 1.29 (1.18,1.40)                 | 0.80 (0.60,1.08) |
| Myocardial infarction               | 316            | 0.69 (0.62,0.77)                 | 246   | 0.52 (0.46,0.59)                 | 0.76 (0.34,1.72) | 499                     | 1.03 (0.95,1.13)                 | 1.49 (0.82,2.70) | 263              | 0.55 (0.49,0.62)                 | 0.80 (0.56,1.14) | 666                   | 1.69 (1.56,1.82)                 | 2.47 (0.72,8.52) |
| Heart Failure                       | 135            | 0.29 (0.25,0.35)                 | 320   | 0.68 (0.61,0.76)                 | 2.31 (1.12,4.76) | 327                     | 0.67 (0.60,0.75)                 | 2.28 (1.13,4.63) | 148              | 0.31 (0.26,0.36)                 | 1.04 (0.65,1.67) | 128                   | 0.32 (0.27,0.39)                 | 1.10 (0.42,2.91) |
| Atrial fibrillation                 | 128            | 0.28 (0.23,0.33)                 | 280   | 0.60 (0.53,0.67)                 | 2.15 (0.96,4.79) | 84                      | 0.17 (0.14,0.22)                 | 0.63 (0.19,2.11) | 166              | 0.35 (0.30,0.40)                 | 1.25 (0.80,1.95) | 130                   | 0.33 (0.28,0.39)                 | 1.16 (0.65,2.10) |
| Coronary Artery Disease             | 608            | 1.34 (1.24,1.45)                 | 717   | 1.55 (1.44,1.66)                 | 1.15 (0.72,1.85) | 913                     | 1.91 (1.79,2.04)                 | 1.42 (0.94,2.14) | 663              | 1.40 (1.30,1.51)                 | 1.04 (0.83,1.31) | 496                   | 1.28 (1.17,1.39)                 | 0.95 (0.70,1.29) |
| Deep vein thrombosis                | 46             | 0.10 (0.08,0.13)                 | 0     | NA                               | NA               | 0                       | NA                               | NA               | 55               | 0.12 (0.09,0.15)                 | 1.15 (0.54,2.44) | 28                    | 0.07 (0.05,0.10)                 | 0.71 (0.22,2.35) |
| Cardiovascular mortality            | 168            | 0.36 (0.31,0.42)                 | 138   | 0.29 (0.25,0.35)                 | 0.81 (0.28,2.35) | 176                     | 0.36 (0.31,0.42)                 | 1.00 (0.42,2.35) | 76               | 0.16 (0.13,0.20)                 | 0.44 (0.23,0.81) | 89                    | 0.22 (0.18,0.27)                 | 0.61 (0.30,1.22) |
| Chronic pulmonary disease           | 148            | 0.32 (0.28,0.38)                 | 260   | 0.56 (0.49,0.63)                 | 1.72 (0.80,3.71) | 171                     | 0.36 (0.31,0.41)                 | 1.10 (0.43,2.83) | 184              | 0.39 (0.33,0.44)                 | 1.19 (0.78,1.81) | 91                    | 0.23 (0.19,0.28)                 | 0.71 (0.35,1.44) |
| Acute respiratory distress syndrome | 192            | 0.42 (0.36,0.48)                 | 261   | 0.56 (0.49,0.63)                 | 1.33 (0.61,2.92) | 223                     | 0.46 (0.40,0.52)                 | 1.10 (0.47,2.56) | 200              | 0.42 (0.36,0.48)                 | 1.00 (0.66,1.50) | 223                   | 0.56 (0.49,0.64)                 | 1.36 (0.62,2.96) |
| Seizure                             | 186            | 0.41 (0.35,0.47)                 | 701   | 1.51 (1.40,1.63)                 | 3.72 (2.31,5.97) | 544                     | 1.13 (1.04,1.23)                 | 2.78 (1.64,4.71) | 158              | 0.33 (0.28,0.39)                 | 0.81 (0.53,1.24) | 138                   | 0.35 (0.30,0.41)                 | 0.87 (0.30,2.51) |
| End-stage renal disease             | 25             | 0.05 (0.04,0.08)                 | 36    | 0.08 (0.06,0.11)                 | 1.40 (0.32,6.12) | 51                      | 0.10 (0.08,0.14)                 | 1.89 (0.50,7.21) | 17               | 0.03 (0.02,0.05)                 | 0.63 (0.18,2.18) | 0                     | NA                               | NA               |
| Acute kidney injury                 | 81             | 0.18 (0.14,0.22)                 | 33    | 0.07 (0.05,0.10)                 | 0.39 (0.09,1.70) | 66                      | 0.14 (0.11,0.17)                 | 0.77 (0.23,2.62) | 54               | 0.11 (0.09,0.15)                 | 0.64 (0.31,1.31) | 22                    | 0.06 (0.03,0.08)                 | 0.31 (0.07,1.30) |
| Pancreatitis                        | 91             | 0.20 (0.16,0.24)                 | 167   | 0.35 (0.30,0.41)                 | 1.80 (0.63,5.12) | 89                      | 0.18 (0.15,0.23)                 | 0.94 (0.23,3.84) | 81               | 0.17 (0.14,0.21)                 | 0.86 (0.47,1.58) | 38                    | 0.10 (0.07,0.13)                 | 0.48 (0.18,1.33) |
| All-cause mortality                 | 1,478          | 3.21 (3.05,3.37)                 | 2,702 | 5.73 (5.52,5.95)                 | 1.79 (1.43,2.23) | 1,353                   | 2.79 (2.64,2.94)                 | 0.87 (0.65,1.17) | 1,045            | 2.18 (2.05,2.31)                 | 0.68 (0.57,0.81) | 1,325                 | 3.35 (3.17,3.53)                 | 1.04 (0.67,1.63) |

Note: CI: confidence interval, REF: Reference group; Major CVD: Major Cardiovascular Disease; Composite outcome of stroke, heart failure and coronary artery disease  
Hazard Ratio (HR) and 95% Confidence Interval (95% CI) were estimated by Cox regression, HR >1 (or <1) indicates patients with COVID-19 had higher (lower) risk of sequelae compared to the non-COVID-19 control cohort  
Un-vaccinated, Incomplete vaccinated, Fully Vaccinated and Received booster dose of COVID-19 vaccines refers to patients who have received 0 dose, 1 doses, 2 doses and ≥3 doses of BioNtech or CoronaVac COVID-19 vaccines, respectively

**Supplementary Table 14. Incidence rate and hazard ratio of clinical sequelae in COVID-19 and non-COVID-19 cohort after weighting during 0-30, 31-90, 91-180, 181-270, 271-365 days of SARS-CoV-2 infection (Patients aged 65 or under; continued)**

|                                     |       | Controls (REF)                   |       | COVID-19                         |                         |       |                                  |                   |                       |                                  |                  |       |                                  |                   |
|-------------------------------------|-------|----------------------------------|-------|----------------------------------|-------------------------|-------|----------------------------------|-------------------|-----------------------|----------------------------------|------------------|-------|----------------------------------|-------------------|
|                                     |       | Unvaccinated                     |       |                                  | Incompletely vaccinated |       | Fully vaccinated                 |                   | Received booster dose |                                  |                  |       |                                  |                   |
| Clinical sequelae                   | Event | Incidence per 1,000 person-years | Event | Incidence per 1,000 person-years | Hazard ratio            | Event | Incidence per 1,000 person-years | Hazard ratio      | Event                 | Incidence per 1,000 person-years | Hazard ratio     | Event | Incidence per 1,000 person-years | Hazard ratio      |
| Major CVD                           | 774   | 2.94 (2.74,3.15)                 | 634   | 2.23 (2.06,2.40)                 | 0.82 (0.51,1.33)        | 1,065 | 4.23 (3.98,4.49)                 | 1.42 (0.97,2.08)  | 634                   | 2.44 (2.26,2.64)                 | 0.83 (0.67,1.02) | 877   | 3.60 (3.37,3.85)                 | 1.20 (0.69,2.11)  |
| Stroke                              | 402   | 1.50 (1.36,1.66)                 | 353   | 1.22 (1.09,1.35)                 | 0.88 (0.44,1.77)        | 340   | 1.33 (1.19,1.47)                 | 0.87 (0.46,1.66)  | 363                   | 1.37 (1.24,1.52)                 | 0.91 (0.68,1.21) | 554   | 2.23 (2.05,2.43)                 | 1.46 (0.62,3.42)  |
| Myocardial infarction               | 168   | 0.62 (0.53,0.72)                 | 83    | 0.28 (0.22,0.35)                 | 0.50 (0.15,1.59)        | 282   | 1.09 (0.96,1.22)                 | 1.73 (0.80,3.73)  | 106                   | 0.40 (0.33,0.48)                 | 0.64 (0.38,1.07) | 151   | 0.60 (0.51,0.71)                 | 0.95 (0.54,1.68)  |
| Heart Failure                       | 109   | 0.40 (0.33,0.49)                 | 69    | 0.24 (0.19,0.30)                 | 0.63 (0.16,2.52)        | 259   | 1.00 (0.88,1.13)                 | 2.45 (1.07,5.59)  | 69                    | 0.26 (0.20,0.32)                 | 0.63 (0.34,1.18) | 91    | 0.36 (0.30,0.45)                 | 0.90 (0.37,2.19)  |
| Atrial fibrillation                 | 72    | 0.27 (0.21,0.34)                 | 165   | 0.56 (0.48,0.65)                 | 2.12 (0.86,5.22)        | 49    | 0.19 (0.14,0.25)                 | 0.71 (0.10,5.14)  | 88                    | 0.33 (0.27,0.41)                 | 1.23 (0.67,2.28) | 54    | 0.22 (0.17,0.28)                 | 0.82 (0.32,2.10)  |
| Coronary Artery Disease             | 342   | 1.28 (1.15,1.42)                 | 215   | 0.74 (0.64,0.84)                 | 0.63 (0.32,1.26)        | 513   | 2.00 (1.84,2.18)                 | 1.54 (0.89,2.67)  | 245                   | 0.93 (0.82,1.05)                 | 0.73 (0.52,1.02) | 279   | 1.13 (1.00,1.27)                 | 0.86 (0.54,1.37)  |
| Deep vein thrombosis                | 11    | 0.04 (0.02,0.07)                 | 40    | 0.13 (0.10,0.18)                 | 3.29 (0.60,17.90)       | 0     | NA                               | NA                | 5                     | 0.02 (0.01,0.04)                 | 0.49 (0.06,3.98) | 24    | 0.09 (0.06,0.14)                 | 2.23 (0.47,10.58) |
| Cardiovascular mortality            | 16    | 0.06 (0.04,0.10)                 | 95    | 0.32 (0.26,0.39)                 | 4.29 (0.97,19.00)       | 0     | NA                               | NA                | 0                     | NA                               | NA               | 0     | NA                               | NA                |
| Chronic pulmonary disease           | 123   | 0.46 (0.38,0.54)                 | 146   | 0.50 (0.43,0.59)                 | 1.18 (0.39,3.57)        | 217   | 0.84 (0.73,0.96)                 | 1.83 (0.73,4.57)  | 126                   | 0.48 (0.40,0.57)                 | 1.04 (0.64,1.70) | 79    | 0.32 (0.25,0.40)                 | 0.69 (0.32,1.51)  |
| Acute respiratory distress syndrome | 82    | 0.30 (0.24,0.38)                 | 127   | 0.43 (0.36,0.51)                 | 1.56 (0.54,4.48)        | 182   | 0.70 (0.61,0.81)                 | 2.27 (0.96,5.35)  | 63                    | 0.24 (0.18,0.30)                 | 0.78 (0.39,1.53) | 171   | 0.68 (0.58,0.79)                 | 2.17 (0.41,11.50) |
| Seizure                             | 115   | 0.42 (0.35,0.51)                 | 140   | 0.48 (0.41,0.57)                 | 1.22 (0.52,2.89)        | 166   | 0.64 (0.55,0.75)                 | 1.51 (0.60,3.81)  | 100                   | 0.37 (0.31,0.45)                 | 0.88 (0.52,1.47) | 8     | 0.03 (0.02,0.06)                 | 0.08 (0.01,0.56)  |
| End-stage renal disease             | 17    | 0.06 (0.04,0.10)                 | 84    | 0.28 (0.23,0.35)                 | 4.97 (1.21,20.42)       | 0     | NA                               | NA                | 5                     | 0.02 (0.01,0.04)                 | 0.27 (0.03,2.11) | 33    | 0.13 (0.09,0.18)                 | 1.98 (0.25,15.55) |
| Acute kidney injury                 | 36    | 0.13 (0.10,0.18)                 | 0     | NA                               | NA                      | 22    | 0.08 (0.05,0.12)                 | 0.61 (0.08,4.50)  | 37                    | 0.14 (0.10,0.19)                 | 1.03 (0.42,2.52) | 43    | 0.17 (0.13,0.23)                 | 1.24 (0.43,3.56)  |
| Pancreatitis                        | 27    | 0.10 (0.07,0.14)                 | 90    | 0.30 (0.25,0.37)                 | 3.42 (0.93,12.58)       | 103   | 0.39 (0.32,0.48)                 | 3.91 (1.06,14.47) | 11                    | 0.04 (0.02,0.07)                 | 0.41 (0.09,1.78) | 14    | 0.06 (0.03,0.09)                 | 0.54 (0.07,4.08)  |
| All-cause mortality                 | 926   | 3.41 (3.20,3.64)                 | 1,461 | 4.95 (4.70,5.21)                 | 1.55 (1.14,2.11)        | 933   | 3.58 (3.36,3.82)                 | 1.04 (0.72,1.51)  | 673                   | 2.51 (2.33,2.71)                 | 0.73 (0.59,0.91) | 416   | 1.65 (1.50,1.81)                 | 0.48 (0.27,0.84)  |

Note: CI: confidence interval, REF: Reference group; Major CVD: Major Cardiovascular Disease; Composite outcome of stroke, heart failure and coronary artery disease

Hazard Ratio (HR) and 95% Confidence Interval (95% CI) were estimated by Cox regression, HR >1 (or <1) indicates patients with COVID-19 had higher (lower) risk of sequelae compared to the non-COVID-19 control cohort

Un-vaccinated, Incomplete vaccinated, Fully Vaccinated and Received booster dose of COVID-19 vaccines refers to patients who have received 0 dose, 1 doses, 2 doses and ≥3 doses of BioNtech or CoronaVac COVID-19 vaccines, respectively

**Supplementary Table 15. Incidence rate and hazard ratio of clinical sequelae in COVID-19 and non-COVID-19 cohort after weighting during 0-30, 31-90, 91-180, 181-270, 271-365 days of SARS-CoV-2 infection (Patients with Charlson Co-morbidity Index <4)**

**0-30days**

| Clinical sequelae                   | Controls (REF) |                                  | COVID-19     |                                  |                        |                         |                                  |                       |                  |                                  |                   |                       |                                  |                   |
|-------------------------------------|----------------|----------------------------------|--------------|----------------------------------|------------------------|-------------------------|----------------------------------|-----------------------|------------------|----------------------------------|-------------------|-----------------------|----------------------------------|-------------------|
|                                     | Event          | Incidence per 1,000 person-years | Unvaccinated |                                  |                        | Incompletely vaccinated |                                  |                       | Fully vaccinated |                                  |                   | Received booster dose |                                  |                   |
|                                     |                |                                  | Event        | Incidence per 1,000 person-years | Hazard ratio           | Event                   | Incidence per 1,000 person-years | Hazard ratio          | Event            | Incidence per 1,000 person-years | Hazard ratio      | Event                 | Incidence per 1,000 person-years | Hazard ratio      |
| Major CVD                           | 790            | 2.97 (2.76,3.18)                 | 3,153        | 12.01 (11.60,12.44)              | 4.04 (3.12,5.23)       | 2,039                   | 7.75 (7.42,8.09)                 | 2.61 (1.93,3.53)      | 1,701            | 6.41 (6.11,6.72)                 | 2.16 (1.82,2.57)  | 1,439                 | 5.13 (4.87,5.40)                 | 1.73 (1.46,2.05)  |
| Stroke                              | 474            | 1.74 (1.59,1.90)                 | 2,006        | 7.48 (7.16,7.81)                 | 4.29 (3.10,5.93)       | 1,297                   | 4.82 (4.56,5.09)                 | 2.77 (1.92,3.99)      | 1,080            | 3.98 (3.75,4.22)                 | 2.29 (1.84,2.84)  | 852                   | 2.95 (2.75,3.15)                 | 1.69 (1.36,2.11)  |
| Myocardial infarction               | 162            | 0.59 (0.50,0.68)                 | 744          | 2.74 (2.55,2.94)                 | 4.64 (2.74,7.84)       | 536                     | 1.97 (1.81,2.15)                 | 3.34 (1.76,6.34)      | 388              | 1.42 (1.28,1.56)                 | 2.41 (1.67,3.47)  | 365                   | 1.25 (1.13,1.39)                 | 2.13 (1.52,2.98)  |
| Heart Failure                       | 71             | 0.26 (0.20,0.33)                 | 284          | 1.04 (0.93,1.17)                 | 4.03 (1.79,9.08)       | 281                     | 1.03 (0.92,1.16)                 | 3.99 (1.80,8.87)      | 193              | 0.71 (0.61,0.81)                 | 2.73 (1.59,4.69)  | 126                   | 0.43 (0.36,0.51)                 | 1.67 (0.95,2.95)  |
| Atrial fibrillation                 | 60             | 0.22 (0.17,0.28)                 | 298          | 1.10 (0.98,1.23)                 | 5.04 (2.06,12.32)      | 181                     | 0.67 (0.58,0.77)                 | 3.06 (1.24,7.59)      | 130              | 0.48 (0.40,0.56)                 | 2.18 (1.18,4.02)  | 199                   | 0.69 (0.60,0.79)                 | 3.15 (1.90,5.23)  |
| Coronary Artery Disease             | 303            | 1.12 (1.00,1.26)                 | 1,020        | 3.81 (3.59,4.05)                 | 3.39 (2.18,5.26)       | 665                     | 2.49 (2.31,2.69)                 | 2.21 (1.29,3.80)      | 544              | 2.02 (1.86,2.20)                 | 1.80 (1.34,2.42)  | 534                   | 1.88 (1.73,2.05)                 | 1.67 (1.27,2.20)  |
| Deep vein thrombosis                | 14             | 0.05 (0.03,0.09)                 | 247          | 0.91 (0.80,1.02)                 | 17.46 (6.19,49.23)     | 125                     | 0.46 (0.39,0.55)                 | 8.87 (2.36,33.34)     | 8                | 0.03 (0.01,0.05)                 | 0.53 (0.07,4.14)  | 28                    | 0.10 (0.06,0.13)                 | 1.85 (0.58,5.94)  |
| Cardiovascular mortality            | 242            | 0.88 (0.77,1.00)                 | 2,036        | 7.47 (7.15,7.80)                 | 8.49 (6.07,11.88)      | 899                     | 3.30 (3.09,3.52)                 | 3.75 (2.40,5.87)      | 430              | 1.57 (1.42,1.72)                 | 1.78 (1.27,2.49)  | 191                   | 0.66 (0.57,0.75)                 | 0.75 (0.48,1.15)  |
| Chronic pulmonary disease           | 65             | 0.24 (0.18,0.30)                 | 208          | 0.77 (0.67,0.88)                 | 6.25 (3.26,11.17,9.06) | 399                     | 1.48 (1.34,1.63)                 | 6.25 (2.89,13.52)     | 202              | 0.74 (0.64,0.85)                 | 3.14 (1.87,5.26)  | 147                   | 0.51 (0.43,0.60)                 | 2.17 (1.28,3.69)  |
| Acute respiratory distress syndrome | 91             | 0.33 (0.27,0.40)                 | 1,421        | 5.23 (4.97,5.51)                 | 15.86 (10.18,24.69)    | 198                     | 0.73 (0.63,0.84)                 | 6.78 (2.21,0.91,5.38) | 171              | 0.62 (0.53,0.72)                 | 1.89 (1.11,3.22)  | 155                   | 0.53 (0.45,0.62)                 | 1.62 (0.98,2.66)  |
| Seizure                             | 63             | 0.23 (0.18,0.29)                 | 419          | 1.56 (1.41,1.71)                 | 6.81 (3.49,13.28)      | 418                     | 1.55 (1.41,1.70)                 | 6.78 (3.28,14.05)     | 145              | 0.53 (0.45,0.62)                 | 2.32 (1.32,4.08)  | 109                   | 0.38 (0.31,0.45)                 | 1.65 (0.91,2.99)  |
| End-stage renal disease             | 7              | 0.03 (0.01,0.05)                 | 7            | 0.03 (0.01,0.05)                 | 1.37 (0.95,1.11,8.13)  | 10                      | 0.04 (0.02,0.07)                 | 1.37 (0.16,11.69)     | 20               | 0.07 (0.04,0.11)                 | 2.69 (0.64,11.28) | 19                    | 0.07 (0.04,0.10)                 | 2.46 (0.58,10.36) |
| Acute kidney injury                 | 24             | 0.09 (0.06,0.13)                 | 164          | 0.60 (0.52,0.70)                 | 6.98 (2.17,22.45)      | 406                     | 1.49 (1.35,1.64)                 | 17.24 (7.49,39.71)    | 30               | 0.11 (0.07,0.15)                 | 1.25 (0.42,3.78)  | 101                   | 0.35 (0.28,0.42)                 | 4.01 (1.85,8.68)  |
| Pancreatitis                        | 33             | 0.12 (0.09,0.17)                 | 187          | 0.69 (0.59,0.79)                 | 5.69 (1.91,16.94)      | 139                     | 0.51 (0.43,0.60)                 | 4.25 (1.14,15.76)     | 82               | 0.30 (0.24,0.37)                 | 2.48 (1.19,5.16)  | 108                   | 0.37 (0.31,0.45)                 | 3.08 (1.59,5.96)  |
| All-cause mortality                 | 721            | 2.62 (2.43,2.81)                 | 19,352       | 70.97 (69.98,71.98)              | 27.10 (23.83,30.82)    | 8,494                   | 31.16 (30.50,31.83)              | 11.90 (10.11,14.01)   | 2,239            | 8.16 (7.83,8.50)                 | 3.12 (2.66,3.65)  | 744                   | 2.55 (2.37,2.74)                 | 0.97 (0.78,1.22)  |

Note: CI: confidence interval, REF: Reference group; Major CVD: Major Cardiovascular Disease; Composite outcome of stroke, heart failure and coronary artery disease  
Hazard Ratio (HR) and 95% Confidence Interval (95% CI) were estimated by Cox regression, HR >1 (or <1) indicates patients with COVID-19 had higher (lower) risk of sequelae compared to the non-COVID-19 control cohort  
Un-vaccinated, Incomplete vaccinated, Fully Vaccinated and Received booster dose of COVID-19 vaccines refers to patients who have received 0 dose, 1 doses, 2 doses and ≥3 doses of BioNtech or CoronaVac COVID-19 vaccines, respectively

**Supplementary Table 15. Incidence rate and hazard ratio of clinical sequelae in COVID-19 and non-COVID-19 cohort after weighting during 0-30, 31-90, 91-180, 181-270, 271-365 days of SARS-CoV-2 infection (Patients with Charlson Co-morbidity Index <4; continued)**

| 31-90 days                          |                |                                  |       |                                  |                   |                         |                                  |                   |                  |                                  |                  |                       |                                  |                  |
|-------------------------------------|----------------|----------------------------------|-------|----------------------------------|-------------------|-------------------------|----------------------------------|-------------------|------------------|----------------------------------|------------------|-----------------------|----------------------------------|------------------|
| Clinical sequelae                   | Controls (REF) |                                  |       | COVID-19                         |                   |                         |                                  |                   |                  |                                  |                  |                       |                                  |                  |
|                                     | Event          | Incidence per 1,000 person-years | Event | Unvaccinated                     |                   | Incompletely vaccinated |                                  |                   | Fully vaccinated |                                  |                  | Received booster dose |                                  |                  |
|                                     |                |                                  | Event | Incidence per 1,000 person-years | Hazard ratio      | Event                   | Incidence per 1,000 person-years | Hazard ratio      | Event            | Incidence per 1,000 person-years | Hazard ratio     | Event                 | Incidence per 1,000 person-years | Hazard ratio     |
| Major CVD                           | 1,991          | 3.81 (3.64,3.98)                 | 3,606 | 7.01 (6.78,7.24)                 | 1.84 (1.47,2.30)  | 2,485                   | 4.80 (4.62,4.99)                 | 1.26 (0.97,1.64)  | 1,944            | 3.73 (3.57,3.90)                 | 0.98 (0.85,1.13) | 1,966                 | 3.62 (3.46,3.79)                 | 0.95 (0.83,1.09) |
| Stroke                              | 1,094          | 2.04 (1.93,2.17)                 | 1,526 | 2.90 (2.76,3.05)                 | 1.42 (0.99,2.03)  | 1,364                   | 2.58 (2.44,2.72)                 | 1.26 (0.88,1.81)  | 985              | 1.85 (1.73,1.96)                 | 0.90 (0.73,1.11) | 888                   | 1.59 (1.49,1.70)                 | 0.78 (0.64,0.95) |
| Myocardial infarction               | 402            | 0.74 (0.68,0.82)                 | 488   | 0.92 (0.84,1.00)                 | 1.23 (0.67,2.26)  | 331                     | 0.62 (0.56,0.69)                 | 0.83 (0.38,1.82)  | 426              | 0.79 (0.72,0.87)                 | 1.06 (0.77,1.46) | 357                   | 0.63 (0.57,0.70)                 | 0.85 (0.63,1.16) |
| Heart Failure                       | 201            | 0.37 (0.32,0.43)                 | 738   | 1.38 (1.29,1.49)                 | 3.72 (2.29,6.05)  | 192                     | 0.36 (0.31,0.41)                 | 0.97 (0.42,2.22)  | 278              | 0.52 (0.46,0.58)                 | 1.39 (0.93,2.07) | 164                   | 0.29 (0.25,0.34)                 | 0.78 (0.49,1.25) |
| Atrial fibrillation                 | 194            | 0.36 (0.31,0.41)                 | 397   | 0.75 (0.68,0.82)                 | 2.08 (1.05,4.09)  | 291                     | 0.55 (0.49,0.61)                 | 1.52 (0.72,3.17)  | 253              | 0.47 (0.42,0.53)                 | 1.31 (0.86,1.99) | 275                   | 0.49 (0.44,0.55)                 | 1.37 (0.94,1.99) |
| Coronary Artery Disease             | 808            | 1.53 (1.42,1.64)                 | 1,606 | 3.06 (2.92,3.22)                 | 2.01 (1.45,2.77)  | 1,010                   | 1.93 (1.81,2.05)                 | 1.26 (0.83,1.91)  | 827              | 1.57 (1.46,1.68)                 | 1.03 (0.82,1.28) | 1,057                 | 1.92 (1.81,2.04)                 | 1.26 (1.04,1.52) |
| Deep vein thrombosis                | 61             | 0.11 (0.09,0.14)                 | 261   | 0.49 (0.43,0.55)                 | 4.35 (1.82,10.42) | 32                      | 0.06 (0.04,0.08)                 | 0.54 (0.07,3.89)  | 53               | 0.10 (0.08,0.13)                 | 0.88 (0.39,1.97) | 59                    | 0.10 (0.08,0.13)                 | 0.93 (0.43,2.00) |
| Cardiovascular mortality            | 343            | 0.63 (0.57,0.70)                 | 262   | 0.49 (0.43,0.55)                 | 0.77 (0.33,1.81)  | 162                     | 0.30 (0.26,0.35)                 | 0.48 (0.19,1.19)  | 232              | 0.43 (0.38,0.49)                 | 0.68 (0.44,1.04) | 176                   | 0.31 (0.27,0.36)                 | 0.49 (0.32,0.77) |
| Chronic pulmonary disease           | 183            | 0.34 (0.30,0.39)                 | 459   | 0.87 (0.79,0.95)                 | 2.54 (1.35,4.79)  | 389                     | 0.73 (0.66,0.81)                 | 2.15 (1.05,4.38)  | 161              | 0.30 (0.26,0.35)                 | 0.88 (0.54,1.44) | 171                   | 0.31 (0.27,0.36)                 | 0.91 (0.58,1.42) |
| Acute respiratory distress syndrome | 321            | 0.59 (0.53,0.66)                 | 586   | 1.10 (1.02,1.19)                 | 1.86 (1.04,3.32)  | 466                     | 0.87 (0.80,0.95)                 | 1.47 (0.80,2.69)  | 321              | 0.60 (0.53,0.66)                 | 1.00 (0.70,1.44) | 353                   | 0.63 (0.56,0.70)                 | 1.06 (0.77,1.45) |
| Seizure                             | 188            | 0.35 (0.30,0.40)                 | 432   | 0.82 (0.74,0.90)                 | 2.35 (1.23,4.49)  | 445                     | 0.84 (0.76,0.92)                 | 2.40 (1.28,4.52)  | 186              | 0.35 (0.30,0.40)                 | 1.00 (0.63,1.57) | 111                   | 0.20 (0.16,0.24)                 | 0.57 (0.34,0.96) |
| End-stage renal disease             | 16             | 0.03 (0.02,0.05)                 | 40    | 0.07 (0.05,0.10)                 | 2.57 (0.33,19.90) | 57                      | 0.11 (0.08,0.14)                 | 3.68 (0.48,28.54) | 29               | 0.05 (0.04,0.08)                 | 1.87 (0.51,6.87) | 22                    | 0.04 (0.02,0.06)                 | 1.34 (0.37,4.86) |
| Acute kidney injury                 | 62             | 0.12 (0.09,0.15)                 | 238   | 0.45 (0.39,0.51)                 | 3.88 (1.59,9.45)  | 257                     | 0.48 (0.43,0.54)                 | 4.18 (1.84,9.48)  | 76               | 0.14 (0.11,0.17)                 | 1.22 (0.57,2.64) | 51                    | 0.09 (0.07,0.12)                 | 0.79 (0.33,1.87) |
| Pancreatitis                        | 97             | 0.18 (0.15,0.22)                 | 440   | 0.82 (0.75,0.90)                 | 4.61 (2.25,9.48)  | 161                     | 0.30 (0.26,0.35)                 | 1.68 (0.60,4.76)  | 69               | 0.13 (0.10,0.16)                 | 0.72 (0.34,1.51) | 100                   | 0.18 (0.14,0.21)                 | 0.99 (0.55,1.78) |
| All-cause mortality                 | 1,475          | 2.72 (2.59,2.86)                 | 5,047 | 9.44 (9.18,9.70)                 | 3.46 (2.83,4.23)  | 2,068                   | 3.86 (3.69,4.03)                 | 1.42 (1.06,1.89)  | 1,023            | 1.90 (1.78,2.02)                 | 0.70 (0.57,0.85) | 1,586                 | 2.81 (2.68,2.95)                 | 1.03 (0.45,2.36) |

Note: CI: confidence interval, REF: Reference group; Major CVD: Major Cardiovascular Disease; Composite outcome of stroke, heart failure and coronary artery disease  
Hazard Ratio (HR) and 95% Confidence Interval (95% CI) were estimated by Cox regression, HR >1 (or <1) indicates patients with COVID-19 had higher (lower) risk of sequelae compared to the non-COVID-19 control cohort  
Un-vaccinated, Incomplete vaccinated, Fully Vaccinated and Received booster dose of COVID-19 vaccines refers to patients who have received 0 dose, 1 doses, 2 doses and ≥3 doses of BioNtech or CoronaVac COVID-19 vaccines, respectively

**Supplementary Table 15. Incidence rate and hazard ratio of clinical sequelae in COVID-19 and non-COVID-19 cohort after weighting during 0-30, 31-90, 91-180, 181-270, 271-365 days of SARS-CoV-2 infection (Patients with Charlson Co-morbidity Index <4; continued)**

| <b>91-180 days</b>                  |                       |                                         |              |                                         |                     |              |                                         |                     |              |                                         |                     |              |                                         |                     |
|-------------------------------------|-----------------------|-----------------------------------------|--------------|-----------------------------------------|---------------------|--------------|-----------------------------------------|---------------------|--------------|-----------------------------------------|---------------------|--------------|-----------------------------------------|---------------------|
| <b>Clinical sequelae</b>            | <b>Controls (REF)</b> |                                         |              | <b>COVID-19</b>                         |                     |              |                                         |                     |              |                                         |                     |              |                                         |                     |
|                                     | <b>Event</b>          | <b>Incidence per 1,000 person-years</b> | <b>Event</b> | <b>Unvaccinated</b>                     |                     |              | <b>Incompletely vaccinated</b>          |                     |              | <b>Fully vaccinated</b>                 |                     |              | <b>Received booster dose</b>            |                     |
|                                     |                       |                                         | <b>Event</b> | <b>Incidence per 1,000 person-years</b> | <b>Hazard ratio</b> | <b>Event</b> | <b>Incidence per 1,000 person-years</b> | <b>Hazard ratio</b> | <b>Event</b> | <b>Incidence per 1,000 person-years</b> | <b>Hazard ratio</b> | <b>Event</b> | <b>Incidence per 1,000 person-years</b> | <b>Hazard ratio</b> |
| Major CVD                           | 2,777                 | 4.11 (3.96,4.27)                        | 4,576        | 6.41 (6.22,6.59)                        | 1.56 (1.28,1.92)    | 3,684        | 4.89 (4.73,5.05)                        | 1.20 (0.96,1.49)    | 2,883        | 3.86 (3.72,4.00)                        | 0.94 (0.84,1.07)    | 2,059        | 3.48 (3.34,3.64)                        | 0.84 (0.74,0.95)    |
| Stroke                              | 1,507                 | 2.18 (2.07,2.29)                        | 1,920        | 2.63 (2.51,2.75)                        | 1.21 (0.88,1.67)    | 1,836        | 2.38 (2.27,2.49)                        | 1.10 (0.80,1.50)    | 1,570        | 2.05 (1.95,2.16)                        | 0.95 (0.80,1.12)    | 1,019        | 1.68 (1.58,1.78)                        | 0.76 (0.63,0.91)    |
| Myocardial infarction               | 535                   | 0.77 (0.70,0.83)                        | 853          | 1.15 (1.08,1.23)                        | 1.50 (0.92,2.46)    | 545          | 0.70 (0.64,0.76)                        | 0.91 (0.52,1.60)    | 487          | 0.63 (0.58,0.69)                        | 0.83 (0.61,1.12)    | 506          | 0.83 (0.76,0.90)                        | 1.07 (0.82,1.41)    |
| Heart Failure                       | 306                   | 0.44 (0.39,0.49)                        | 809          | 1.09 (1.02,1.17)                        | 2.52 (1.58,4.03)    | 641          | 0.82 (0.76,0.89)                        | 1.92 (1.10,3.34)    | 382          | 0.49 (0.45,0.55)                        | 1.15 (0.82,1.61)    | 187          | 0.31 (0.26,0.35)                        | 0.67 (0.43,1.05)    |
| Atrial fibrillation                 | 319                   | 0.46 (0.41,0.51)                        | 454          | 0.62 (0.56,0.67)                        | 1.35 (0.71,2.57)    | 354          | 0.46 (0.41,0.51)                        | 1.00 (0.52,1.92)    | 480          | 0.62 (0.57,0.68)                        | 1.37 (1.01,1.87)    | 361          | 0.59 (0.53,0.66)                        | 1.28 (0.92,1.77)    |
| Coronary Artery Disease             | 1,131                 | 1.65 (1.56,1.75)                        | 2,122        | 2.92 (2.79,3.04)                        | 1.76 (1.31,2.37)    | 1,527        | 2.00 (1.90,2.10)                        | 1.21 (0.88,1.67)    | 1,122        | 1.48 (1.40,1.57)                        | 0.90 (0.74,1.09)    | 988          | 1.65 (1.55,1.76)                        | 1.00 (0.82,1.21)    |
| Deep vein thrombosis                | 82                    | 0.12 (0.09,0.14)                        | 75           | 0.10 (0.08,0.13)                        | 0.87 (0.26,2.88)    | 227          | 0.29 (0.25,0.33)                        | 2.51 (1.05,6.00)    | 62           | 0.08 (0.06,0.10)                        | 0.69 (0.31,1.54)    | 63           | 0.10 (0.08,0.13)                        | 0.86 (0.40,1.82)    |
| Cardiovascular mortality            | 444                   | 0.63 (0.58,0.70)                        | 697          | 0.94 (0.87,1.01)                        | 1.48 (0.93,2.35)    | 491          | 0.63 (0.58,0.69)                        | 0.99 (0.54,1.83)    | 369          | 0.48 (0.43,0.53)                        | 0.75 (0.53,1.06)    | 93           | 0.15 (0.12,0.18)                        | 0.24 (0.13,0.43)    |
| Chronic pulmonary disease           | 259                   | 0.37 (0.33,0.42)                        | 675          | 0.92 (0.85,0.99)                        | 2.46 (1.42,4.26)    | 679          | 0.88 (0.81,0.95)                        | 2.36 (1.39,3.99)    | 342          | 0.45 (0.40,0.50)                        | 1.20 (0.85,1.70)    | 241          | 0.40 (0.35,0.45)                        | 1.06 (0.69,1.63)    |
| Acute respiratory distress syndrome | 380                   | 0.55 (0.49,0.60)                        | 954          | 1.29 (1.21,1.37)                        | 2.35 (1.50,3.68)    | 647          | 0.83 (0.77,0.90)                        | 1.51 (0.90,2.53)    | 613          | 0.79 (0.73,0.86)                        | 1.44 (1.09,1.91)    | 276          | 0.45 (0.40,0.51)                        | 0.84 (0.59,1.20)    |
| Seizure                             | 249                   | 0.36 (0.31,0.40)                        | 610          | 0.83 (0.77,0.90)                        | 2.34 (1.38,4.00)    | 684          | 0.88 (0.82,0.95)                        | 2.50 (1.48,4.22)    | 239          | 0.31 (0.27,0.35)                        | 0.88 (0.59,1.30)    | 169          | 0.28 (0.24,0.32)                        | 0.76 (0.46,1.25)    |
| End-stage renal disease             | 33                    | 0.05 (0.03,0.06)                        | 61           | 0.08 (0.06,0.11)                        | 1.81 (0.21,15.66)   | 141          | 0.18 (0.15,0.21)                        | 4.01 (0.89,18.01)   | 25           | 0.03 (0.02,0.05)                        | 0.73 (0.16,3.25)    | 0            | NA                                      | NA                  |
| Acute kidney injury                 | 116                   | 0.17 (0.14,0.20)                        | 239          | 0.32 (0.28,0.36)                        | 1.93 (0.74,5.06)    | 22           | 0.03 (0.02,0.04)                        | 0.17 (0.02,1.22)    | 107          | 0.14 (0.11,0.17)                        | 0.83 (0.44,1.58)    | 48           | 0.08 (0.06,0.10)                        | 0.47 (0.20,1.11)    |
| Pancreatitis                        | 117                   | 0.17 (0.14,0.20)                        | 102          | 0.14 (0.11,0.17)                        | 0.81 (0.20,3.27)    | 125          | 0.16 (0.13,0.19)                        | 0.93 (0.23,3.83)    | 102          | 0.13 (0.11,0.16)                        | 0.77 (0.40,1.47)    | 74           | 0.12 (0.10,0.15)                        | 0.76 (0.39,1.48)    |
| All-cause mortality                 | 2,058                 | 2.94 (2.82,3.07)                        | 5,268        | 7.09 (6.90,7.28)                        | 2.40 (1.99,2.89)    | 2,540        | 3.25 (3.13,3.38)                        | 1.09 (0.84,1.43)    | 1,397        | 1.81 (1.71,1.90)                        | 0.61 (0.51,0.72)    | 7,231        | 11.78 (11.51,12.06)                     | 4.08 (0.74,22.49)   |

Note: CI: confidence interval, REF: Reference group; Major CVD: Major Cardiovascular Disease; Composite outcome of stroke, heart failure and coronary artery disease  
Hazard Ratio (HR) and 95% Confidence Interval (95% CI) were estimated by Cox regression, HR >1 (or <1) indicates patients with COVID-19 had higher (lower) risk of sequelae compared to the non-COVID-19 control cohort  
Un-vaccinated, Incomplete vaccinated, Fully Vaccinated and Received booster dose of COVID-19 vaccines refers to patients who have received 0 dose, 1 doses, 2 doses and ≥3 doses of BioNtech or CoronaVac COVID-19 vaccines, respectively

**Supplementary Table 15. Incidence rate and hazard ratio of clinical sequelae in COVID-19 and non-COVID-19 cohort after weighting during 0-30, 31-90, 91-180, 181-270, 271-365 days of SARS-CoV-2 infection (Patients with Charlson Co-morbidity Index <4; continued)**

| 181-270 days                        |                |                                  |       |                                  |                  |                         |                                  |                  |       |                                  |                  |       |                                  |                  |
|-------------------------------------|----------------|----------------------------------|-------|----------------------------------|------------------|-------------------------|----------------------------------|------------------|-------|----------------------------------|------------------|-------|----------------------------------|------------------|
| Clinical sequelae                   | Controls (REF) |                                  |       | COVID-19                         |                  |                         |                                  |                  |       |                                  |                  |       |                                  |                  |
|                                     | Event          | Incidence per 1,000 person-years | Event | Unvaccinated                     |                  | Incompletely vaccinated |                                  | Fully vaccinated |       | Received booster dose            |                  |       |                                  |                  |
|                                     |                |                                  | Event | Incidence per 1,000 person-years | Hazard ratio     | Event                   | Incidence per 1,000 person-years | Hazard ratio     | Event | Incidence per 1,000 person-years | Hazard ratio     | Event | Incidence per 1,000 person-years | Hazard ratio     |
| Major CVD                           | 2,254          | 4.25 (4.08,4.43)                 | 3,070 | 5.67 (5.47,5.87)                 | 1.33 (1.06,1.68) | 2,991                   | 5.35 (5.16,5.54)                 | 1.26 (1.02,1.56) | 2,108 | 3.82 (3.66,3.98)                 | 0.90 (0.79,1.02) | 1,756 | 2.76 (2.64,2.89)                 | 0.65 (0.48,0.89) |
| Stroke                              | 1,227          | 2.26 (2.14,2.39)                 | 1,879 | 3.39 (3.24,3.55)                 | 1.50 (1.11,2.02) | 1,310                   | 2.29 (2.17,2.41)                 | 1.01 (0.73,1.40) | 1,114 | 1.97 (1.86,2.09)                 | 0.87 (0.73,1.04) | 851   | 1.32 (1.23,1.41)                 | 0.58 (0.41,0.82) |
| Myocardial infarction               | 460            | 0.84 (0.76,0.92)                 | 395   | 0.70 (0.63,0.77)                 | 0.84 (0.46,1.53) | 732                     | 1.26 (1.17,1.36)                 | 1.51 (0.96,2.36) | 339   | 0.59 (0.53,0.66)                 | 0.71 (0.52,0.97) | 368   | 0.57 (0.51,0.62)                 | 0.68 (0.44,1.05) |
| Heart Failure                       | 244            | 0.44 (0.39,0.50)                 | 479   | 0.85 (0.78,0.93)                 | 1.92 (1.11,3.31) | 555                     | 0.96 (0.88,1.04)                 | 2.15 (1.31,3.55) | 202   | 0.35 (0.31,0.40)                 | 0.80 (0.53,1.19) | 210   | 0.32 (0.28,0.37)                 | 0.73 (0.41,1.32) |
| Atrial fibrillation                 | 265            | 0.49 (0.43,0.55)                 | 515   | 0.92 (0.84,1.00)                 | 1.90 (1.13,3.18) | 380                     | 0.66 (0.60,0.73)                 | 1.36 (0.76,2.45) | 393   | 0.69 (0.62,0.76)                 | 1.43 (1.04,1.95) | 207   | 0.32 (0.28,0.36)                 | 0.65 (0.37,1.12) |
| Coronary Artery Disease             | 939            | 1.75 (1.64,1.86)                 | 1,123 | 2.03 (1.92,2.15)                 | 1.16 (0.81,1.66) | 1,379                   | 2.43 (2.30,2.56)                 | 1.39 (1.02,1.90) | 998   | 1.78 (1.67,1.90)                 | 1.02 (0.85,1.23) | 850   | 1.33 (1.24,1.42)                 | 0.77 (0.54,1.09) |
| Deep vein thrombosis                | 72             | 0.13 (0.10,0.17)                 | 0     | NA                               | NA               | 0                       | NA                               | NA               | 62    | 0.11 (0.08,0.14)                 | 0.82 (0.39,1.69) | 33    | 0.05 (0.03,0.07)                 | 0.37 (0.11,1.24) |
| Cardiovascular mortality            | 254            | 0.46 (0.41,0.52)                 | 448   | 0.79 (0.72,0.87)                 | 1.72 (0.94,3.17) | 205                     | 0.35 (0.31,0.40)                 | 0.77 (0.33,1.77) | 129   | 0.23 (0.19,0.27)                 | 0.49 (0.29,0.82) | 142   | 0.22 (0.18,0.26)                 | 0.44 (0.22,0.90) |
| Chronic pulmonary disease           | 242            | 0.44 (0.39,0.50)                 | 327   | 0.59 (0.52,0.65)                 | 1.32 (0.66,2.63) | 296                     | 0.51 (0.46,0.58)                 | 1.16 (0.59,2.29) | 295   | 0.52 (0.46,0.58)                 | 1.17 (0.83,1.66) | 158   | 0.24 (0.21,0.29)                 | 0.57 (0.32,1.02) |
| Acute respiratory distress syndrome | 294            | 0.54 (0.48,0.60)                 | 608   | 1.08 (1.00,1.17)                 | 2.01 (1.21,3.36) | 326                     | 0.56 (0.50,0.63)                 | 1.04 (0.54,2.01) | 262   | 0.46 (0.40,0.52)                 | 0.85 (0.59,1.23) | 222   | 0.34 (0.30,0.39)                 | 0.66 (0.39,1.12) |
| Seizure                             | 196            | 0.36 (0.31,0.41)                 | 811   | 1.46 (1.36,1.56)                 | 4.06 (2.58,6.39) | 586                     | 1.02 (0.94,1.10)                 | 2.84 (1.72,4.67) | 160   | 0.28 (0.24,0.33)                 | 0.78 (0.51,1.19) | 67    | 0.10 (0.08,0.13)                 | 0.29 (0.13,0.66) |
| End-stage renal disease             | 26             | 0.05 (0.03,0.07)                 | 32    | 0.06 (0.04,0.08)                 | 1.20 (0.28,5.21) | 20                      | 0.04 (0.02,0.05)                 | 0.73 (0.10,5.51) | 45    | 0.08 (0.06,0.10)                 | 1.65 (0.63,4.29) | 0     | NA                               | NA               |
| Acute kidney injury                 | 97             | 0.18 (0.14,0.21)                 | 46    | 0.08 (0.06,0.11)                 | 0.46 (0.12,1.72) | 99                      | 0.17 (0.14,0.21)                 | 0.97 (0.34,2.78) | 87    | 0.15 (0.12,0.19)                 | 0.86 (0.47,1.58) | 37    | 0.06 (0.04,0.08)                 | 0.32 (0.09,1.12) |
| Pancreatitis                        | 109            | 0.20 (0.16,0.24)                 | 157   | 0.28 (0.24,0.32)                 | 1.41 (0.51,3.91) | 122                     | 0.21 (0.17,0.25)                 | 1.07 (0.33,3.42) | 96    | 0.17 (0.14,0.20)                 | 0.85 (0.49,1.49) | 61    | 0.09 (0.07,0.12)                 | 0.45 (0.19,1.08) |
| All-cause mortality                 | 1,801          | 3.27 (3.13,3.43)                 | 3,698 | 6.55 (6.34,6.77)                 | 2.00 (1.60,2.50) | 1,651                   | 2.84 (2.71,2.98)                 | 0.87 (0.65,1.16) | 1,208 | 2.11 (1.99,2.23)                 | 0.64 (0.54,0.77) | 743   | 1.14 (1.06,1.22)                 | 0.35 (0.24,0.51) |

Note: CI: confidence interval, REF: Reference group; Major CVD: Major Cardiovascular Disease; Composite outcome of stroke, heart failure and coronary artery disease  
Hazard Ratio (HR) and 95% Confidence Interval (95% CI) were estimated by Cox regression, HR >1 (or <1) indicates patients with COVID-19 had higher (lower) risk of sequelae compared to the non-COVID-19 control cohort  
Un-vaccinated, Incomplete vaccinated, Fully Vaccinated and Received booster dose of COVID-19 vaccines refers to patients who have received 0 dose, 1 doses, 2 doses and ≥3 doses of BioNtech or CoronaVac COVID-19 vaccines, respectively

**Supplementary Table 15. Incidence rate and hazard ratio of clinical sequelae in COVID-19 and non-COVID-19 cohort after weighting during 0-30, 31-90, 91-180, 181-270, 271-365 days of SARS-CoV-2 infection (Patients with Charlson Co-morbidity Index <4; continued)**

| 271-365 days                        |       |                                  |              |                                  |                   |                         |                                  |                  |                  |                                  |                  |                       |                                  |                  |
|-------------------------------------|-------|----------------------------------|--------------|----------------------------------|-------------------|-------------------------|----------------------------------|------------------|------------------|----------------------------------|------------------|-----------------------|----------------------------------|------------------|
| Controls (REF)                      |       |                                  | COVID-19     |                                  |                   |                         |                                  |                  |                  |                                  |                  |                       |                                  |                  |
| Clinical sequelae                   | Event | Incidence per 1,000 person-years | Unvaccinated |                                  |                   | Incompletely vaccinated |                                  |                  | Fully vaccinated |                                  |                  | Received booster dose |                                  |                  |
|                                     |       |                                  | Event        | Incidence per 1,000 person-years | Hazard ratio      | Event                   | Incidence per 1,000 person-years | Hazard ratio     | Event            | Incidence per 1,000 person-years | Hazard ratio     | Event                 | Incidence per 1,000 person-years | Hazard ratio     |
| Major CVD                           | 1,270 | 4.09 (3.87,4.32)                 | 1,301        | 3.93 (3.72,4.15)                 | 1.01 (0.72,1.42)  | 1,626                   | 5.44 (5.18,5.71)                 | 1.32 (0.99,1.76) | 1,169            | 3.81 (3.60,4.03)                 | 0.93 (0.79,1.10) | 1,178                 | 4.14 (3.91,4.38)                 | 1.00 (0.79,1.26) |
| Stroke                              | 683   | 2.15 (1.99,2.32)                 | 570          | 1.69 (1.55,1.83)                 | 0.80 (0.47,1.35)  | 572                     | 1.87 (1.72,2.03)                 | 0.87 (0.53,1.41) | 662              | 2.11 (1.95,2.27)                 | 0.98 (0.78,1.23) | 600                   | 2.06 (1.90,2.23)                 | 0.95 (0.68,1.33) |
| Myocardial infarction               | 256   | 0.80 (0.71,0.90)                 | 208          | 0.61 (0.53,0.69)                 | 0.82 (0.35,1.91)  | 435                     | 1.41 (1.28,1.55)                 | 1.74 (0.99,3.06) | 180              | 0.57 (0.49,0.66)                 | 0.71 (0.46,1.09) | 198                   | 0.67 (0.59,0.77)                 | 0.83 (0.49,1.40) |
| Heart Failure                       | 161   | 0.50 (0.43,0.58)                 | 242          | 0.71 (0.62,0.80)                 | 1.53 (0.72,3.24)  | 333                     | 1.08 (0.97,1.20)                 | 2.12 (1.11,4.06) | 184              | 0.58 (0.50,0.67)                 | 1.15 (0.75,1.77) | 189                   | 0.64 (0.55,0.74)                 | 1.26 (0.65,2.45) |
| Atrial fibrillation                 | 139   | 0.43 (0.37,0.51)                 | 198          | 0.58 (0.50,0.66)                 | 1.36 (0.60,3.06)  | 205                     | 0.67 (0.58,0.76)                 | 1.54 (0.66,3.59) | 189              | 0.60 (0.52,0.69)                 | 1.38 (0.88,2.14) | 119                   | 0.40 (0.34,0.48)                 | 0.93 (0.46,1.87) |
| Coronary Artery Disease             | 533   | 1.69 (1.55,1.84)                 | 525          | 1.56 (1.43,1.70)                 | 0.99 (0.60,1.65)  | 759                     | 2.50 (2.33,2.68)                 | 1.46 (0.96,2.22) | 376              | 1.21 (1.09,1.33)                 | 0.71 (0.53,0.95) | 426                   | 1.48 (1.34,1.62)                 | 0.86 (0.60,1.23) |
| Deep vein thrombosis                | 22    | 0.07 (0.04,0.10)                 | 58           | 0.17 (0.13,0.22)                 | 2.66 (0.47,14.92) | 0                       | NA                               | NA               | 15               | 0.05 (0.03,0.07)                 | 0.70 (0.15,3.18) | 26                    | 0.09 (0.06,0.13)                 | 1.31 (0.30,5.72) |
| Cardiovascular mortality            | 26    | 0.08 (0.05,0.11)                 | 81           | 0.24 (0.19,0.29)                 | 2.25 (0.50,10.17) | 0                       | NA                               | NA               | 7                | 0.02 (0.01,0.05)                 | 0.29 (0.04,2.20) | 0                     | NA                               | NA               |
| Chronic pulmonary disease           | 169   | 0.53 (0.45,0.61)                 | 201          | 0.59 (0.51,0.68)                 | 1.20 (0.51,2.87)  | 234                     | 0.76 (0.67,0.87)                 | 1.43 (0.64,3.19) | 180              | 0.57 (0.49,0.66)                 | 1.08 (0.70,1.65) | 92                    | 0.32 (0.26,0.39)                 | 0.59 (0.28,1.22) |
| Acute respiratory distress syndrome | 135   | 0.42 (0.36,0.50)                 | 163          | 0.48 (0.41,0.55)                 | 1.23 (0.48,3.16)  | 277                     | 0.90 (0.79,1.00)                 | 2.09 (1.07,4.09) | 161              | 0.51 (0.43,0.59)                 | 1.20 (0.74,1.94) | 90                    | 0.31 (0.25,0.38)                 | 0.71 (0.29,1.73) |
| Seizure                             | 127   | 0.40 (0.33,0.47)                 | 159          | 0.47 (0.40,0.54)                 | 1.28 (0.53,3.07)  | 220                     | 0.72 (0.63,0.82)                 | 1.80 (0.82,3.94) | 109              | 0.34 (0.29,0.42)                 | 0.87 (0.52,1.44) | 21                    | 0.07 (0.05,0.11)                 | 0.18 (0.04,0.75) |
| End-stage renal disease             | 12    | 0.04 (0.02,0.07)                 | 42           | 0.12 (0.09,0.17)                 | 3.60 (0.64,20.20) | 0                       | NA                               | NA               | 4                | 0.01 (0.01,0.03)                 | 0.37 (0.05,2.93) | 0                     | NA                               | NA               |
| Acute kidney injury                 | 43    | 0.13 (0.10,0.18)                 | 0            | NA                               | 2.38 (0.55,10.21) | 51                      | 0.17 (0.13,0.22)                 | 1.23 (0.28,5.29) | 46               | 0.14 (0.11,0.19)                 | 1.08 (0.47,2.49) | 53                    | 0.18 (0.14,0.23)                 | 1.31 (0.46,3.71) |
| Pancreatitis                        | 31    | 0.10 (0.07,0.14)                 | 72           | 0.21 (0.16,0.26)                 | 3.04 (0.84,11.02) | 93                      | 0.30 (0.25,0.37)                 | 0.81 (0.27,2.37) | 25               | 0.08 (0.05,0.11)                 | 0.81 (0.27,2.37) | 18                    | 0.06 (0.04,0.09)                 | 0.60 (0.08,4.45) |
| All-cause mortality                 | 1,125 | 3.49 (3.29,3.70)                 | 2,053        | 5.98 (5.72,6.24)                 | 1.81 (1.39,2.36)  | 1,103                   | 3.56 (3.35,3.77)                 | 1.01 (0.72,1.42) | 882              | 2.78 (2.60,2.96)                 | 0.79 (0.65,0.96) | 559                   | 1.89 (1.74,2.06)                 | 0.54 (0.37,0.77) |

Note: CI: confidence interval, REF: Reference group; Major CVD: Major Cardiovascular Disease; Composite outcome of stroke, heart failure and coronary artery disease  
Hazard Ratio (HR) and 95% Confidence Interval (95% CI) were estimated by Cox regression, HR >1 (or <1) indicates patients with COVID-19 had higher (lower) risk of sequelae compared to the non-COVID-19 control cohort  
Un-vaccinated, Incomplete vaccinated, Fully Vaccinated and Received booster dose of COVID-19 vaccines refers to patients who have received 0 dose, 1 doses, 2 doses and ≥3 doses of BioNtech or CoronaVac COVID-19 vaccines, respectively



**Supplementary Table 16. Incidence rate and hazard ratio of clinical sequelae in COVID-19 and non-COVID-19 cohort after weighting during 0-30, 31-90, 91-180, 181-270, 271-365 days of SARS-CoV-2 infection (Patients with Charlson Co-morbidity Index  $\geq 4$ )**

**0-30 days**

| Clinical sequelae                   | Controls (REF) |                                  | COVID-19 |                                  |                     |        |                                  |                   |        |                                  |                  |       |                                  |                  |
|-------------------------------------|----------------|----------------------------------|----------|----------------------------------|---------------------|--------|----------------------------------|-------------------|--------|----------------------------------|------------------|-------|----------------------------------|------------------|
|                                     | Event          | Incidence per 1,000 person-years | Event    | Incidence per 1,000 person-years | Hazard ratio        | Event  | Incidence per 1,000 person-years | Hazard ratio      | Event  | Incidence per 1,000 person-years | Hazard ratio     | Event | Incidence per 1,000 person-years | Hazard ratio     |
| Major CVD                           | 520            | 15.22 (13.94,16.56)              | 2,279    | 76.30 (73.20,79.47)              | 4.90 (4.06,5.91)    | 1,765  | 54.81 (52.30,57.41)              | 3.56 (2.82,4.49)  | 1,628  | 48.57 (46.25,50.97)              | 3.17 (2.58,3.90) | 1,349 | 39.27 (37.21,41.40)              | 2.58 (2.04,3.26) |
| Stroke                              | 345            | 8.49 (7.63,9.42)                 | 1,338    | 37.34 (35.38,39.38)              | 4.29 (3.37,5.46)    | 1,042  | 27.21 (25.58,28.88)              | 3.17 (2.35,4.26)  | 1,214  | 30.45 (28.79,32.22)              | 3.57 (2.79,4.56) | 925   | 22.57 (21.16,24.07)              | 2.66 (1.97,3.57) |
| Myocardial infarction               | 141            | 2.93 (2.47,3.44)                 | 968      | 21.74 (20.40,23.14)              | 7.21 (5.34,9.72)    | 883    | 19.12 (17.90,20.43)              | 6.43 (4.51,9.15)  | 572    | 12.13 (11.17,13.16)              | 4.11 (2.86,5.90) | 595   | 12.44 (11.47,13.47)              | 4.24 (2.93,6.13) |
| Heart Failure                       | 202            | 4.33 (3.76,4.95)                 | 744      | 17.30 (16.09,18.58)              | 3.95 (2.86,5.46)    | 537    | 12.03 (11.05,13.08)              | 2.76 (1.85,4.12)  | 452    | 9.92 (9.04,10.87)                | 2.28 (1.57,3.33) | 247   | 5.30 (4.67,5.99)                 | 1.22 (0.72,2.07) |
| Atrial fibrillation                 | 96             | 2.09 (1.71,2.55)                 | 357      | 8.43 (7.60,9.35)                 | 3.97 (2.50,6.32)    | 352    | 7.99 (7.18,8.85)                 | 3.79 (2.28,6.30)  | 295    | 6.54 (5.83,7.32)                 | 3.12 (1.92,5.05) | 381   | 8.32 (7.51,9.18)                 | 3.97 (2.51,6.29) |
| Coronary Artery Disease             | 179            | 4.13 (3.56,4.77)                 | 955      | 23.51 (22.07,25.05)              | 5.54 (4.15,7.41)    | 884    | 21.08 (19.72,22.50)              | 5.03 (3.58,7.07)  | 706    | 16.56 (15.36,17.81)              | 3.98 (2.89,5.49) | 633   | 14.76 (13.66,15.96)              | 3.57 (2.51,5.06) |
| Deep vein thrombosis                | 26             | 0.52 (0.34,0.75)                 | 90       | 73.18 (1.57,2.38)                | 3.69 (1.50,9.10)    | 138    | 45.39 (2.46,3.44)                | 5.56 (2.33,13.27) | 103    | 33.50 (1.74,2.56)                | 4.06 (1.73,9.53) | 63    | 18.21 (0.99,1.62)                | 2.44 (0.80,7.43) |
| Cardiovascular mortality            | 889            | 17.94 (16.79,19.15)              | 3,391    | 73.18 (70.73,75.66)              | 4.02 (3.47,4.64)    | 2,167  | 45.39 (43.50,47.32)              | 2.51 (2.06,3.06)  | 1,629  | 33.50 (31.91,35.16)              | 1.86 (1.52,2.28) | 898   | 18.21 (17.05,19.43)              | 1.01 (0.76,1.36) |
| Chronic pulmonary disease           | 51             | 1.11 (0.85,1.46)                 | 139      | 3.31 (2.79,3.89)                 | 2.92 (1.49,5.71)    | 260    | 5.98 (5.28,6.73)                 | 5.32 (2.82,10.05) | 201    | 5.32 (3.91,5.16)                 | 4.03 (2.13,7.63) | 100   | 2.21 (1.82,2.69)                 | 1.99 (0.90,4.39) |
| Acute respiratory distress syndrome | 99             | 2.05 (1.68,2.49)                 | 368      | 9.89 (8.21,7.40,9.08)            | 3.93 (2.43,6.35)    | 460    | 9.89 (9.01,10.82)                | 4.78 (2.97,7.67)  | 278    | 5.85 (5.20,6.58)                 | 2.84 (1.75,4.61) | 286   | 5.93 (5.27,6.64)                 | 2.89 (1.78,4.70) |
| Seizure                             | 40             | 0.81 (0.58,1.09)                 | 289      | 7.78 (6.38,5.67,7.15)            | 7.78 (4.21,14.37)   | 142    | 3.02 (2.56,3.55)                 | 3.72 (1.66,8.32)  | 90     | 1.86 (1.50,2.27)                 | 2.30 (1.01,5.25) | 92    | 1.88 (1.52,2.29)                 | 2.33 (1.03,5.25) |
| End-stage renal disease             | 29             | 0.58 (0.39,0.82)                 | 180      | 6.61 (3.91,3.36,4.50)            | 6.61 (2.72,16.03)   | 35     | 0.73 (0.51,1.00)                 | 1.25 (0.27,5.76)  | 68     | 1.40 (1.09,1.76)                 | 2.39 (0.85,6.75) | 24    | 0.49 (0.31,0.70)                 | 0.83 (0.17,3.98) |
| Acute kidney injury                 | 64             | 1.33 (1.03,1.68)                 | 489      | 8.14 (10.92,9.99,11.93)          | 8.14 (5.23,12.65)   | 386    | 6.21 (8.29,7.48,9.14)            | 6.21 (3.67,10.51) | 269    | 6.21 (4.99,6.34)                 | 4.24 (2.50,7.19) | 307   | 6.34 (5.66,7.08)                 | 4.77 (2.72,8.37) |
| Pancreatitis                        | 24             | 0.48 (0.31,0.70)                 | 77       | 1.67 (1.32,2.07)                 | 3.46 (1.40,8.51)    | 15     | 0.31 (0.18,0.50)                 | 0.64 (0.08,4.87)  | 56     | 1.15 (0.87,1.48)                 | 2.41 (0.79,7.32) | 35    | 0.71 (0.50,0.97)                 | 1.48 (0.33,6.63) |
| All-cause mortality                 | 4,802          | 96.95 (94.24,99.72)              | 55,938   | 1,207.12 (1,197.14,1,217.15)     | 12.30 (11.74,12.90) | 31,336 | 656.38 (649.14,663.68)           | 6.73 (6.34,7.15)  | 17,987 | 369.86 (364.50,375.31)           | 3.80 (3.56,4.06) | 8,035 | 163.02 (159.47,166.60)           | 1.68 (1.50,1.88) |

Note: CI: confidence interval, REF: Reference group; Major CVD: Major Cardiovascular Disease; Composite outcome of stroke, heart failure and coronary artery disease  
Hazard Ratio (HR) and 95% Confidence Interval (95% CI) were estimated by Cox regression, HR >1 (or <1) indicates patients with COVID-19 had higher (lower) risk of sequelae compared to the non-COVID-19 control cohort  
Un-vaccinated, Incomplete vaccinated, Fully Vaccinated and Received booster dose of COVID-19 vaccines refers to patients who have received 0 dose, 1 doses, 2 doses and  $\geq 3$  doses of BioNtech or CoronaVac COVID-19 vaccines, respectively

**Supplementary Table 16. Incidence rate and hazard ratio of clinical sequelae in COVID-19 and non-COVID-19 cohort after weighting during 0-30, 31-90, 91-180, 181-270, 271-365 days of SARS-CoV-2 infection (Patients with Charlson Co-morbidity Index  $\geq 4$ ; continued)**

**31-90 days**

| Clinical sequelae                   | Controls (REF) |                                  | COVID-19 |                                  |                  |       |                                  |                  |       |                                  |                  |       |                                  |                  |
|-------------------------------------|----------------|----------------------------------|----------|----------------------------------|------------------|-------|----------------------------------|------------------|-------|----------------------------------|------------------|-------|----------------------------------|------------------|
|                                     | Event          | Incidence per 1,000 person-years | Event    | Incidence per 1,000 person-years | Hazard ratio     | Event | Incidence per 1,000 person-years | Hazard ratio     | Event | Incidence per 1,000 person-years | Hazard ratio     | Event | Incidence per 1,000 person-years | Hazard ratio     |
| Major CVD                           | 1,135          | 17.26 (16.27,18.28)              | 2,068    | 35.66 (34.14,37.21)              | 2.07 (1.71,2.49) | 1,767 | 28.30 (26.99,29.63)              | 1.64 (1.32,2.03) | 1,387 | 21.45 (20.34,22.59)              | 1.24 (1.01,1.52) | 1,724 | 26.24 (25.02,27.50)              | 1.52 (1.25,1.85) |
| Stroke                              | 685            | 8.76 (8.12,9.43)                 | 1,211    | 17.39 (16.42,18.38)              | 1.99 (1.56,2.52) | 977   | 13.16 (12.35,14.00)              | 1.50 (1.12,2.02) | 784   | 10.22 (9.52,10.96)               | 1.17 (0.89,1.53) | 785   | 10.04 (9.35,10.76)               | 1.15 (0.86,1.52) |
| Myocardial infarction               | 296            | 3.21 (2.87,3.60)                 | 604      | 6.98 (6.44,7.56)                 | 2.16 (1.58,2.97) | 317   | 3.54 (3.17,3.95)                 | 1.10 (0.66,1.82) | 289   | 3.19 (2.84,3.57)                 | 0.99 (0.65,1.52) | 360   | 3.95 (3.56,4.38)                 | 1.23 (0.80,1.88) |
| Heart Failure                       | 530            | 5.92 (5.43,6.44)                 | 1,250    | 14.95 (14.15,15.80)              | 2.53 (2.00,3.19) | 879   | 10.14 (9.49,10.83)               | 1.71 (1.27,2.31) | 755   | 8.59 (7.99,9.22)                 | 1.45 (1.09,1.93) | 938   | 10.56 (9.90,11.25)               | 1.78 (1.35,2.35) |
| Atrial fibrillation                 | 281            | 3.18 (2.83,3.57)                 | 652      | 7.91 (7.31,8.53)                 | 2.48 (1.77,3.47) | 391   | 4.58 (4.15,5.05)                 | 1.44 (0.90,2.30) | 385   | 4.44 (4.01,4.89)                 | 1.39 (0.95,2.04) | 274   | 3.14 (2.79,3.53)                 | 0.99 (0.58,1.67) |
| Coronary Artery Disease             | 418            | 5.03 (4.57,5.54)                 | 856      | 10.84 (10.13,11.58)              | 2.15 (1.61,2.86) | 531   | 6.53 (5.99,7.10)                 | 1.30 (0.87,1.93) | 520   | 6.34 (5.82,6.91)                 | 1.26 (0.91,1.75) | 555   | 6.78 (6.23,7.36)                 | 1.35 (0.96,1.88) |
| Deep vein thrombosis                | 57             | 0.60 (0.46,0.77)                 | 151      | 1.69 (1.44,1.98)                 | 2.81 (1.46,5.40) | 157   | 1.70 (1.45,1.98)                 | 2.83 (1.36,5.88) | 184   | 1.98 (1.70,2.27)                 | 3.29 (1.81,6.00) | 43    | 0.46 (0.34,0.62)                 | 0.77 (0.27,2.18) |
| Cardiovascular mortality            | 1,008          | 10.60 (9.96,11.27)               | 1,630    | 18.09 (17.22,18.98)              | 1.70 (1.41,2.05) | 1,185 | 12.81 (12.10,13.56)              | 1.21 (0.93,1.56) | 992   | 10.61 (9.97,11.29)               | 1.00 (0.78,1.28) | 504   | 5.37 (4.92,5.86)                 | 0.51 (0.35,0.73) |
| Chronic pulmonary disease           | 127            | 1.44 (1.20,1.70)                 | 362      | 4.41 (3.97,4.88)                 | 3.07 (1.95,4.81) | 184   | 2.18 (1.88,2.51)                 | 1.52 (0.78,2.96) | 229   | 2.67 (2.34,3.03)                 | 1.86 (1.11,3.12) | 110   | 1.28 (1.06,1.54)                 | 0.89 (0.42,1.90) |
| Acute respiratory distress syndrome | 219            | 2.35 (2.06,2.69)                 | 420      | 4.82 (4.37,5.29)                 | 2.04 (1.32,3.16) | 407   | 4.50 (4.09,4.96)                 | 1.91 (1.17,3.13) | 284   | 3.11 (2.76,3.49)                 | 1.32 (0.85,2.05) | 259   | 2.81 (2.48,3.16)                 | 1.19 (0.76,1.86) |
| Seizure                             | 100            | 1.06 (0.86,1.28)                 | 235      | 2.67 (2.34,3.02)                 | 2.51 (1.37,4.61) | 87    | 0.95 (0.76,1.16)                 | 0.90 (0.32,2.53) | 164   | 1.77 (1.51,2.05)                 | 1.67 (0.90,3.11) | 64    | 0.69 (0.54,0.88)                 | 0.65 (0.26,1.65) |
| End-stage renal disease             | 47             | 0.50 (0.37,0.66)                 | 44       | 0.49 (0.36,0.65)                 | 0.99 (0.40,2.47) | 86    | 0.93 (0.76,1.15)                 | 1.88 (0.70,5.00) | 31    | 0.33 (0.23,0.46)                 | 0.66 (0.19,2.24) | 0     | NA                               | NA               |
| Acute kidney injury                 | 143            | 1.53 (1.29,1.79)                 | 337      | 3.86 (3.46,4.29)                 | 2.51 (1.66,3.80) | 221   | 2.45 (2.14,2.79)                 | 1.60 (0.84,3.02) | 166   | 1.81 (1.56,2.11)                 | 1.18 (0.66,2.11) | 189   | 2.05 (1.77,2.36)                 | 1.34 (0.74,2.43) |
| Pancreatitis                        | 49             | 0.51 (0.38,0.67)                 | 112      | 1.26 (1.04,1.51)                 | 2.45 (1.07,5.60) | 99    | 1.07 (0.87,1.30)                 | 2.09 (0.86,5.10) | 90    | 0.97 (0.78,1.18)                 | 1.88 (0.77,4.59) | 84    | 0.90 (0.73,1.11)                 | 1.76 (0.77,4.02) |
| All-cause mortality                 | 6,352          | 66.82 (65.19,68.48)              | 16,748   | 185.88 (183.08,188.71)           | 2.77 (2.60,2.95) | 9,559 | 103.30 (101.25,105.39)           | 1.54 (1.41,1.69) | 7,152 | 76.51 (74.75,78.30)              | 1.14 (1.04,1.25) | 5,052 | 53.84 (52.37,55.34)              | 0.80 (0.71,0.91) |

Note: CI: confidence interval, REF: Reference group; Major CVD: Major Cardiovascular Disease; Composite outcome of stroke, heart failure and coronary artery disease

Hazard Ratio (HR) and 95% Confidence Interval (95% CI) were estimated by Cox regression, HR >1 (or <1) indicates patients with COVID-19 had higher (lower) risk of sequelae compared to the non-COVID-19 control cohort

Un-vaccinated, Incomplete vaccinated, Fully Vaccinated and Received booster dose of COVID-19 vaccines refers to patients who have received 0 dose, 1 doses, 2 doses and  $\geq 3$  doses of BioNtech or CoronaVac COVID-19 vaccines, respectively

**Supplementary Table 16. Incidence rate and hazard ratio of clinical sequelae in COVID-19 and non-COVID-19 cohort after weighting during 0-30, 31-90, 91-180, 181-270, 271-365 days of SARS-CoV-2 infection (Patients with Charlson Co-morbidity Index  $\geq 4$ ; continued)**

**91-180 days**

| Clinical sequelae                   | Controls (REF) |                                  | COVID-19     |                                  |                  |                         |                                  |                  |                  |                                  |                  |                       |                                  |                  |
|-------------------------------------|----------------|----------------------------------|--------------|----------------------------------|------------------|-------------------------|----------------------------------|------------------|------------------|----------------------------------|------------------|-----------------------|----------------------------------|------------------|
|                                     | Event          | Incidence per 1,000 person-years | Unvaccinated |                                  |                  | Incompletely vaccinated |                                  |                  | Fully vaccinated |                                  |                  | Received booster dose |                                  |                  |
|                                     |                |                                  | Event        | Incidence per 1,000 person-years | Hazard ratio     | Event                   | Incidence per 1,000 person-years | Hazard ratio     | Event            | Incidence per 1,000 person-years | Hazard ratio     | Event                 | Incidence per 1,000 person-years | Hazard ratio     |
| Major CVD                           | 1,471          | 17.37<br>(16.50,18.28)           | 1,997        | 23.99<br>(22.96,25.06)           | 1.38 (1.14,1.67) | 1,947                   | 21.44<br>(20.51,22.41)           | 1.24 (1.00,1.53) | 1,866            | 20.78<br>(19.86,21.75)           | 1.20 (1.01,1.43) | 1,321                 | 20.03<br>(18.97,21.13)           | 1.14 (0.92,1.42) |
| Stroke                              | 951            | 9.45<br>(8.86,10.07)             | 1,252        | 12.54<br>(11.86,13.25)           | 1.33 (1.05,1.68) | 1,238                   | 11.47<br>(10.84,12.12)           | 1.22 (0.93,1.59) | 1,076            | 10.12<br>(9.52,10.73)            | 1.07 (0.85,1.35) | 619                   | 7.95 (7.34,8.60)                 | 0.84 (0.61,1.14) |
| Myocardial infarction               | 401            | 3.38 (3.06,3.73)                 | 547          | 4.40 (4.05,4.79)                 | 1.30 (0.92,1.83) | 531                     | 4.08 (3.75,4.44)                 | 1.20 (0.81,1.76) | 451              | 3.58 (3.27,3.93)                 | 1.06 (0.74,1.51) | 399                   | 4.41 (3.99,4.86)                 | 1.33 (0.87,2.03) |
| Heart Failure                       | 532            | 4.61 (4.23,5.02)                 | 1,090        | 9.09 (8.57,9.65)                 | 1.97 (1.54,2.52) | 799                     | 6.33 (5.91,6.79)                 | 1.37 (1.01,1.87) | 936              | 7.68 (7.19,8.18)                 | 1.67 (1.29,2.15) | 666                   | 7.53 (6.97,8.11)                 | 1.63 (1.17,2.25) |
| Atrial fibrillation                 | 356            | 3.13 (2.81,3.46)                 | 507          | 4.29 (3.93,4.68)                 | 1.37 (0.95,1.96) | 634                     | 5.10 (4.72,5.51)                 | 1.62 (1.13,2.33) | 492              | 4.09 (3.74,4.46)                 | 1.30 (0.93,1.82) | 398                   | 4.57 (4.13,5.03)                 | 1.50 (0.96,2.33) |
| Coronary Artery Disease             | 585            | 5.47 (5.04,5.92)                 | 742          | 6.54 (6.09,7.03)                 | 1.20 (0.89,1.60) | 862                     | 7.30 (6.83,7.80)                 | 1.33 (0.98,1.81) | 733              | 6.45 (6.00,6.93)                 | 1.18 (0.90,1.55) | 517                   | 6.35 (5.83,6.92)                 | 1.17 (0.82,1.65) |
| Deep vein thrombosis                | 67             | 0.55 (0.43,0.69)                 | 103          | 0.80 (0.66,0.97)                 | 1.46 (0.68,3.16) | 83                      | 0.62 (0.50,0.77)                 | 1.13 (0.40,3.17) | 35               | 0.27 (0.19,0.37)                 | 0.49 (0.15,1.62) | 45                    | 0.49 (0.36,0.65)                 | 0.91 (0.28,3.00) |
| Cardiovascular mortality            | 1,130          | 9.24 (8.71,9.79)                 | 1,639        | 12.68<br>(12.07,13.30)           | 1.37 (1.13,1.66) | 1,073                   | 7.97 (7.51,8.46)                 | 0.86 (0.66,1.12) | 837              | 6.46 (6.03,6.90)                 | 0.70 (0.54,0.90) | 327                   | 3.52 (3.15,3.91)                 | 0.38 (0.24,0.61) |
| Chronic pulmonary disease           | 174            | 1.53 (1.32,1.78)                 | 273          | 2.32 (2.06,2.61)                 | 1.53 (0.94,2.47) | 183                     | 1.50 (1.29,1.73)                 | 0.99 (0.50,1.96) | 211              | 1.77 (1.55,2.03)                 | 1.16 (0.69,1.95) | 188                   | 2.20 (1.91,2.54)                 | 1.39 (0.76,2.52) |
| Acute respiratory distress syndrome | 337            | 2.81 (2.52,3.12)                 | 595          | 4.75 (4.37,5.14)                 | 1.70 (1.16,2.48) | 394                     | 3.00 (2.72,3.31)                 | 1.07 (0.66,1.75) | 408              | 3.21 (2.91,3.53)                 | 1.15 (0.80,1.64) | 233                   | 2.55 (2.24,2.90)                 | 0.90 (0.56,1.44) |
| Seizure                             | 145            | 1.20 (1.02,1.41)                 | 411          | 3.26 (2.96,3.59)                 | 2.75 (1.65,4.57) | 213                     | 1.61 (1.40,1.83)                 | 1.36 (0.72,2.56) | 178              | 1.39 (1.20,1.61)                 | 1.16 (0.65,2.09) | 80                    | 0.86 (0.69,1.07)                 | 0.68 (0.25,1.84) |
| End-stage renal disease             | 56             | 0.46 (0.35,0.59)                 | 57           | 0.44 (0.34,0.57)                 | 0.97 (0.37,2.57) | 52                      | 0.39 (0.29,0.50)                 | 0.84 (0.24,3.00) | 14               | 0.11 (0.07,0.18)                 | 0.24 (0.03,1.75) | 0                     | NA                               | NA               |
| Acute kidney injury                 | 243            | 2.02 (1.78,2.29)                 | 371          | 2.96 (2.68,3.28)                 | 1.47 (0.94,2.29) | 411                     | 3.12 (2.83,3.43)                 | 1.55 (0.98,2.46) | 322              | 2.53 (2.27,2.82)                 | 1.25 (0.83,1.90) | 82                    | 0.90 (0.72,1.11)                 | 0.44 (0.20,0.96) |
| Pancreatitis                        | 64             | 0.52 (0.40,0.66)                 | 109          | 0.85 (0.70,1.02)                 | 1.65 (0.69,3.95) | 86                      | 0.64 (0.51,0.79)                 | 1.25 (0.48,3.25) | 91               | 0.70 (0.57,0.86)                 | 1.36 (0.60,3.06) | 25                    | 0.27 (0.17,0.39)                 | 0.49 (0.12,1.99) |
| All-cause mortality                 | 8,012          | 65.51<br>(64.09,66.96)           | 13,116       | 101.46<br>(99.74,103.21)         | 1.55 (1.44,1.66) | 9,167                   | 68.14<br>(66.76,69.55)           | 1.04 (0.95,1.14) | 7,184            | 55.43<br>(54.16,56.73)           | 0.85 (0.77,0.93) | 3,614                 | 38.87<br>(37.61,40.15)           | 0.59 (0.52,0.68) |

Note: CI: confidence interval, REF: Reference group; Major CVD: Major Cardiovascular Disease; Composite outcome of stroke, heart failure and coronary artery disease

Hazard Ratio (HR) and 95% Confidence Interval (95% CI) were estimated by Cox regression. HR >1 (or <1) indicates patients with COVID-19 had higher (lower) risk of sequelae compared to the non-COVID-19 control cohort

Un-vaccinated, Incomplete vaccinated, Fully Vaccinated and Received booster dose of COVID-19 vaccines refers to patients who have received 0 dose, 1 doses, 2 doses and  $\geq 3$  doses of BioNtech or CoronaVac COVID-19 vaccines, respectively

**Supplementary Table 16. Incidence rate and hazard ratio of clinical sequelae in COVID-19 and non-COVID-19 cohort after weighting during 0-30, 31-90, 91-180, 181-270, 271-365 days of SARS-CoV-2 infection (Patients with Charlson Co-morbidity Index  $\geq 4$ ; continued)**

**181-270 days**

| Clinical sequelae                   | Controls (REF) |                                  | COVID-19 |                                  |                  |       |                                  |                  |       |                                  |                  |       |                                  |                  |
|-------------------------------------|----------------|----------------------------------|----------|----------------------------------|------------------|-------|----------------------------------|------------------|-------|----------------------------------|------------------|-------|----------------------------------|------------------|
|                                     | Event          | Incidence per 1,000 person-years | Event    | Incidence per 1,000 person-years | Hazard ratio     | Event | Incidence per 1,000 person-years | Hazard ratio     | Event | Incidence per 1,000 person-years | Hazard ratio     | Event | Incidence per 1,000 person-years | Hazard ratio     |
| Major CVD                           | 1,207          | 17.88 (16.89,18.91)              | 1,717    | 26.81 (25.55,28.09)              | 1.50 (1.24,1.81) | 1,611 | 23.37 (22.25,24.54)              | 1.31 (1.05,1.62) | 1,544 | 22.84 (21.72,24.00)              | 1.28 (1.06,1.53) | 867   | 16.24 (15.20,17.36)              | 0.91 (0.62,1.35) |
| Stroke                              | 705            | 8.79 (8.16,9.46)                 | 957      | 12.46 (11.69,13.27)              | 1.42 (1.11,1.81) | 884   | 10.80 (10.11,11.53)              | 1.23 (0.92,1.63) | 854   | 10.66 (9.96,11.39)               | 1.21 (0.95,1.55) | 579   | 9.21 (8.48,9.98)                 | 1.06 (0.65,1.73) |
| Myocardial infarction               | 368            | 3.89 (3.51,4.30)                 | 472      | 4.93 (4.50,5.39)                 | 1.27 (0.90,1.78) | 470   | 4.76 (4.35,5.21)                 | 1.22 (0.84,1.78) | 355   | 3.75 (3.38,4.16)                 | 0.96 (0.66,1.40) | 268   | 3.68 (3.25,4.13)                 | 0.95 (0.43,2.12) |
| Heart Failure                       | 527            | 5.72 (5.25,6.22)                 | 998      | 10.81 (10.16,11.50)              | 1.89 (1.49,2.39) | 818   | 8.55 (7.97,9.14)                 | 1.49 (1.12,1.99) | 644   | 7.03 (6.50,7.59)                 | 1.23 (0.92,1.64) | 335   | 4.68 (4.21,5.21)                 | 0.82 (0.41,1.65) |
| Atrial fibrillation                 | 278            | 3.06 (2.71,3.43)                 | 410      | 4.50 (4.09,4.96)                 | 1.47 (1.00,2.18) | 333   | 3.53 (3.17,3.92)                 | 1.16 (0.74,1.82) | 421   | 4.65 (4.22,5.11)                 | 1.52 (1.06,2.18) | 212   | 3.02 (2.63,3.45)                 | 0.98 (0.44,2.17) |
| Coronary Artery Disease             | 521            | 6.11 (5.59,6.64)                 | 673      | 7.71 (7.15,8.31)                 | 1.26 (0.94,1.70) | 664   | 7.41 (6.87,8.00)                 | 1.21 (0.87,1.69) | 606   | 7.09 (6.54,7.67)                 | 1.16 (0.88,1.54) | 247   | 3.78 (3.33,4.28)                 | 0.62 (0.32,1.21) |
| Deep vein thrombosis                | 42             | 0.43 (0.31,0.57)                 | 93       | 0.94 (0.76,1.14)                 | 2.19 (1.05,4.60) | 80    | 0.79 (0.63,0.97)                 | 1.83 (0.74,4.52) | 84    | 0.86 (0.69,1.06)                 | 2.02 (0.89,4.55) | 25    | 0.33 (0.22,0.48)                 | 0.78 (0.11,5.81) |
| Cardiovascular mortality            | 737            | 7.56 (7.03,8.12)                 | 995      | 10.00 (9.39,10.63)               | 1.32 (1.06,1.66) | 857   | 8.40 (7.85,8.97)                 | 1.11 (0.85,1.47) | 535   | 5.49 (5.03,5.96)                 | 0.73 (0.53,0.99) | 461   | 6.15 (5.61,6.73)                 | 0.80 (0.39,1.67) |
| Chronic pulmonary disease           | 120            | 1.32 (1.11,1.58)                 | 384      | 4.24 (3.83,4.68)                 | 3.20 (2.04,5.02) | 292   | 3.15 (2.80,3.52)                 | 2.37 (1.41,3.98) | 90    | 1.01 (0.82,1.24)                 | 0.76 (0.34,1.70) | 53    | 0.78 (0.59,1.01)                 | 0.59 (0.14,2.48) |
| Acute respiratory distress syndrome | 268            | 2.81 (2.49,3.16)                 | 302      | 3.12 (2.79,3.49)                 | 1.11 (0.70,1.77) | 261   | 2.62 (2.32,2.96)                 | 0.93 (0.57,1.53) | 242   | 2.54 (2.23,2.87)                 | 0.91 (0.58,1.41) | 61    | 0.83 (0.65,1.07)                 | 0.30 (0.09,0.95) |
| Seizure                             | 122            | 1.26 (1.06,1.51)                 | 317      | 3.26 (2.91,3.63)                 | 2.59 (1.47,4.58) | 155   | 1.54 (1.32,1.80)                 | 1.23 (0.63,2.42) | 107   | 1.11 (0.92,1.34)                 | 0.88 (0.42,1.82) | 65    | 0.87 (0.68,1.10)                 | 0.66 (0.20,2.12) |
| End-stage renal disease             | 26             | 0.27 (0.18,0.39)                 | 46       | 0.46 (0.34,0.61)                 | 1.70 (0.56,5.17) | 92    | 0.91 (0.74,1.11)                 | 3.34 (1.32,8.40) | 51    | 0.52 (0.39,0.68)                 | 1.91 (0.68,5.36) | 0     | NA                               | NA               |
| Acute kidney injury                 | 206            | 2.15 (1.88,2.46)                 | 329      | 3.41 (3.05,3.79)                 | 1.59 (1.01,2.49) | 222   | 2.23 (1.94,2.53)                 | 1.04 (0.59,1.81) | 199   | 2.08 (1.80,2.38)                 | 0.96 (0.55,1.68) | 76    | 1.03 (0.81,1.27)                 | 0.47 (0.17,1.29) |
| Pancreatitis                        | 65             | 0.67 (0.53,0.85)                 | 109      | 1.10 (0.91,1.32)                 | 1.64 (0.82,3.28) | 47    | 0.47 (0.35,0.62)                 | 0.69 (0.21,2.25) | 58    | 0.59 (0.45,0.76)                 | 0.89 (0.34,2.31) | 66    | 0.88 (0.68,1.11)                 | 1.35 (0.18,9.92) |
| All-cause mortality                 | 6,356          | 65.13 (63.54,66.74)              | 9,496    | 95.43 (93.52,97.36)              | 1.47 (1.36,1.58) | 7,038 | 69.01 (67.40,70.63)              | 1.06 (0.96,1.17) | 4,314 | 44.27 (42.96,45.60)              | 0.68 (0.61,0.76) | 2,798 | 37.38 (36.02,38.79)              | 0.57 (0.44,0.74) |

Note: CI: confidence interval, REF: Reference group; Major CVD: Major Cardiovascular Disease; Composite outcome of stroke, heart failure and coronary artery disease

Hazard Ratio (HR) and 95% Confidence Interval (95% CI) were estimated by Cox regression, HR >1 (or <1) indicates patients with COVID-19 had higher (lower) risk of sequelae compared to the non-COVID-19 control cohort

Un-vaccinated, Incomplete vaccinated, Fully Vaccinated and Received booster dose of COVID-19 vaccines refers to patients who have received 0 dose, 1 doses, 2 doses and  $\geq 3$  doses of BioNtech or CoronaVac COVID-19 vaccines, respectively

**Supplementary Table 16. Incidence rate and hazard ratio of clinical sequelae in COVID-19 and non-COVID-19 cohort after weighting during 0-30, 31-90, 91-180, 181-270, 271-365 days of SARS-CoV-2 infection (Patients with Charlson Co-morbidity Index  $\geq 4$ ; continued)**

**271-365 days**

| Clinical sequelae                   | Controls (REF) |                                  |       | COVID-19                         |                   |       |                                  |                  |       |                                  |                  |       |                                  |                   |
|-------------------------------------|----------------|----------------------------------|-------|----------------------------------|-------------------|-------|----------------------------------|------------------|-------|----------------------------------|------------------|-------|----------------------------------|-------------------|
|                                     | Event          | Incidence per 1,000 person-years |       | Unvaccinated                     |                   |       | Incompletely vaccinated          |                  |       | Fully vaccinated                 |                  |       | Received booster dose            |                   |
|                                     |                |                                  | Event | Incidence per 1,000 person-years | Hazard ratio      | Event | Incidence per 1,000 person-years | Hazard ratio     | Event | Incidence per 1,000 person-years | Hazard ratio     | Event | Incidence per 1,000 person-years | Hazard ratio      |
| Major CVD                           | 815            | 22.25 (20.76,23.81)              | 976   | 28.84 (27.08,30.70)              | 1.32 (1.03,1.69)  | 751   | 21.73 (20.22,23.33)              | 0.97 (0.72,1.30) | 721   | 20.57 (19.10,22.10)              | 0.92 (0.70,1.20) | 318   | 9.57 (8.57,10.68)                | 0.42 (0.21,0.84)  |
| Stroke                              | 412            | 9.48 (8.60,10.43)                | 525   | 12.98 (11.92,14.14)              | 1.38 (0.98,1.95)  | 348   | 8.51 (7.66,9.45)                 | 0.89 (0.58,1.37) | 336   | 8.09 (7.26,8.99)                 | 0.85 (0.57,1.26) | 245   | 6.22 (5.48,7.04)                 | 0.65 (0.27,1.54)  |
| Myocardial infarction               | 252            | 4.91 (4.33,5.55)                 | 235   | 4.69 (4.13,5.33)                 | 0.97 (0.63,1.51)  | 219   | 4.46 (3.89,5.07)                 | 0.90 (0.53,1.51) | 296   | 6.06 (5.40,6.78)                 | 1.22 (0.80,1.87) | 110   | 2.41 (1.99,2.89)                 | 0.48 (0.12,1.87)  |
| Heart Failure                       | 414            | 8.27 (7.50,9.09)                 | 591   | 12.20 (11.25,13.22)              | 1.50 (1.12,2.01)  | 585   | 12.28 (11.32,13.31)              | 1.48 (1.07,2.04) | 492   | 10.38 (9.49,11.33)               | 1.25 (0.90,1.74) | 158   | 3.51 (2.98,4.08)                 | 0.42 (0.13,1.31)  |
| Atrial fibrillation                 | 166            | 3.37 (2.89,3.91)                 | 219   | 4.58 (4.00,5.21)                 | 1.39 (0.84,2.30)  | 197   | 4.21 (3.65,4.83)                 | 1.24 (0.71,2.17) | 142   | 3.01 (2.55,3.54)                 | 0.89 (0.49,1.64) | 299   | 6.76 (6.01,7.54)                 | 1.99 (0.79,4.97)  |
| Coronary Artery Disease             | 330            | 7.12 (6.38,7.91)                 | 316   | 6.93 (6.20,7.73)                 | 0.98 (0.64,1.50)  | 265   | 5.94 (5.26,6.69)                 | 0.83 (0.51,1.36) | 315   | 7.14 (6.39,7.96)                 | 1.00 (0.67,1.49) | 170   | 4.15 (3.57,4.82)                 | 0.58 (0.22,1.53)  |
| Deep vein thrombosis                | 35             | 0.65 (0.46,0.90)                 | 72    | 1.39 (1.09,1.73)                 | 2.16 (0.85,5.46)  | 26    | 0.52 (0.35,0.76)                 | 0.79 (0.19,3.35) | 15    | 0.29 (0.17,0.47)                 | 0.44 (0.10,1.87) | 0     | 0.00 (0.00,0.08)                 | NA                |
| Cardiovascular mortality            | 71             | 1.33 (1.05,1.67)                 | 82    | 1.58 (1.27,1.96)                 | 1.13 (0.55,2.34)  | 44    | 0.87 (0.63,1.14)                 | 0.66 (0.21,2.13) | 0     | 0.00 (0.00,0.07)                 | NA               | 0     | 0.00 (0.00,0.08)                 | NA                |
| Chronic pulmonary disease           | 119            | 2.42 (2.02,2.89)                 | 145   | 3.05 (2.58,3.58)                 | 1.28 (0.70,2.35)  | 201   | 4.34 (3.77,4.97)                 | 1.77 (0.98,3.20) | 175   | 3.78 (3.24,4.36)                 | 1.55 (0.85,2.82) | 20    | 0.47 (0.30,0.71)                 | 0.19 (0.03,1.37)  |
| Acute respiratory distress syndrome | 143            | 2.75 (2.34,3.24)                 | 177   | 3.51 (3.02,4.06)                 | 1.29 (0.71,2.34)  | 223   | 4.51 (3.95,5.13)                 | 1.62 (0.93,2.81) | 141   | 2.86 (2.41,3.35)                 | 1.03 (0.56,1.90) | 125   | 2.70 (2.26,3.21)                 | 0.97 (0.39,2.44)  |
| Seizure                             | 54             | 1.03 (0.79,1.34)                 | 104   | 2.05 (1.69,2.48)                 | 2.00 (0.91,4.39)  | 90    | 1.79 (1.45,2.19)                 | 1.73 (0.76,3.90) | 34    | 0.67 (0.47,0.93)                 | 0.64 (0.22,1.85) | 61    | 1.30 (1.01,1.67)                 | 1.24 (0.28,5.48)  |
| End-stage renal disease             | 28             | 0.52 (0.35,0.74)                 | 102   | 1.96 (1.61,2.37)                 | 3.85 (1.27,11.69) | 44    | 0.87 (0.63,1.15)                 | 1.63 (0.47,5.67) | 0     | 0.00 (0.00,0.07)                 | NA               | 20    | 0.42 (0.26,0.63)                 | 0.79 (0.10,5.96)  |
| Acute kidney injury                 | 108            | 2.07 (1.70,2.48)                 | 117   | 2.31 (1.91,2.75)                 | 1.13 (0.61,2.08)  | 38    | 0.77 (0.56,1.05)                 | 0.37 (0.12,1.16) | 53    | 1.08 (0.82,1.40)                 | 0.51 (0.18,1.41) | 344   | 7.36 (6.61,8.17)                 | 3.37 (0.48,23.76) |
| Pancreatitis                        | 46             | 0.88 (0.65,1.16)                 | 88    | 1.71 (1.38,2.10)                 | 1.97 (0.81,4.78)  | 24    | 0.48 (0.32,0.71)                 | 0.54 (0.13,2.29) | 9     | 0.18 (0.08,0.31)                 | 0.20 (0.03,1.47) | 0     | 0.00 (0.00,0.08)                 | NA                |
| All-cause mortality                 | 3,506          | 66.16 (64.01,68.39)              | 5,671 | 108.99 (106.19,111.86)           | 1.67 (1.51,1.84)  | 3,015 | 59.54 (57.45,61.70)              | 0.89 (0.78,1.03) | 2,596 | 51.59 (49.63,53.60)              | 0.78 (0.67,0.90) | 814   | 17.24 (16.08,18.45)              | 0.26 (0.16,0.42)  |

Note: CI: confidence interval, REF: Reference group; Major CVD: Major Cardiovascular Disease; Composite outcome of stroke, heart failure and coronary artery disease

Hazard Ratio (HR) and 95% Confidence Interval (95% CI) were estimated by Cox regression, HR >1 (or <1) indicates patients with COVID-19 had higher (lower) risk of sequelae compared to the non-COVID-19 control cohort

Un-vaccinated, Incomplete vaccinated, Fully Vaccinated and Received booster dose of COVID-19 vaccines refers to patients who have received 0 dose, 1 doses, 2 doses and  $\geq 3$  doses of BioNtech or CoronaVac COVID-19 vaccines, respectively

**Supplementary Table 17. Incidence rate and hazard ratio of clinical sequelae in COVID-19 and non-COVID-19 cohort after weighting during 0-30, 31-90, 91-180, 181-270, 271-365 days of SARS-CoV-2 infection (Male patients)**

**0-30 days**

| Clinical sequelae                   | Controls (REF) |                                  |              | COVID-19                         |                        |                         |                                  |                      |                  |                                  |                  |                       |                                  |                  |
|-------------------------------------|----------------|----------------------------------|--------------|----------------------------------|------------------------|-------------------------|----------------------------------|----------------------|------------------|----------------------------------|------------------|-----------------------|----------------------------------|------------------|
|                                     | Event          | Incidence per 1,000 person-years | Unvaccinated |                                  |                        | Incompletely vaccinated |                                  |                      | Fully vaccinated |                                  |                  | Received booster dose |                                  |                  |
|                                     |                |                                  | Event        | Incidence per 1,000 person-years | Hazard ratio           | Event                   | Incidence per 1,000 person-years | Hazard ratio         | Event            | Incidence per 1,000 person-years | Hazard ratio     | Event                 | Incidence per 1,000 person-years | Hazard ratio     |
| Major CVD                           | 739            | 5.72 (5.31,6.14)                 | 3,252        | 26.08<br>(25.19,26.98)           | 4.54 (3.69,5.57)       | 1,983                   | 15.59<br>(14.92,16.29)           | 2.72 (2.07,3.57)     | 1,849            | 14.37<br>(13.72,15.03)           | 2.51 (2.11,2.99) | 1,486                 | 11.45<br>(10.88,12.05)           | 2.00 (1.69,2.38) |
| Stroke                              | 431            | 3.15 (2.86,3.45)                 | 1,776        | 13.52<br>(12.90,14.16)           | 4.26 (3.22,5.64)       | 1,317                   | 9.82<br>(9.30,10.36)             | 3.11 (2.25,4.30)     | 1,304            | 9.57<br>(9.07,10.11)             | 3.04 (2.45,3.77) | 864                   | 6.26 (5.85,6.68)                 | 1.99 (1.57,2.51) |
| Myocardial infarction               | 202            | 1.42 (1.24,1.63)                 | 1,083        | 7.84 (7.39,8.32)                 | 5.47 (3.92,7.65)       | 782                     | 5.60 (5.22,6.00)                 | 3.92 (2.52,6.10)     | 607              | 4.31 (3.98,4.66)                 | 3.02 (2.18,4.19) | 572                   | 4.02 (3.70,4.36)                 | 2.83 (2.09,3.82) |
| Heart Failure                       | 122            | 0.86 (0.71,1.02)                 | 694          | 5.05 (4.68,5.43)                 | 5.85 (3.82,8.96)       | 358                     | 2.56 (2.31,2.84)                 | 2.98 (1.68,5.27)     | 281              | 1.99 (1.77,2.24)                 | 2.32 (1.46,3.68) | 239                   | 1.68 (1.47,1.90)                 | 1.95 (1.22,3.11) |
| Atrial fibrillation                 | 86             | 0.61 (0.50,0.75)                 | 288          | 2.11 (1.88,2.36)                 | 3.43 (1.84,6.39)       | 285                     | 2.06 (1.83,2.31)                 | 3.36 (1.73,6.52)     | 218              | 1.56 (1.36,1.77)                 | 2.54 (1.50,4.31) | 230                   | 1.63 (1.43,1.85)                 | 2.66 (1.69,4.20) |
| Coronary Artery Disease             | 329            | 2.43 (2.18,2.71)                 | 1,278        | 9.60 (9.09,10.14)                | 3.93 (2.87,5.37)       | 817                     | 6.08 (5.67,6.51)                 | 2.49 (1.64,3.80)     | 838              | 6.21 (5.80,6.64)                 | 2.55 (1.95,3.33) | 700                   | 5.16 (4.79,5.56)                 | 2.12 (1.64,2.74) |
| Deep vein thrombosis                | 12             | 0.08 (0.04,0.14)                 | 121          | 0.87 (0.72,1.03)                 | (3.39,33.81)           | 87                      | 0.62 (0.49,0.75)                 | (2.24,25.89)         | 34               | 0.24 (0.17,0.33)                 | (0.76,11.73)     | 33                    | 0.23 (0.16,0.31)                 | 2.82 (0.83,9.59) |
| Cardiovascular mortality            | 591            | 4.12 (3.80,4.46)                 | 3,671        | 26.29<br>(25.45,27.15)           | 6.34 (5.27,7.62)       | 1,683                   | 11.91<br>(11.35,12.49)           | 2.88 (2.21,3.76)     | 1,228            | 8.62 (8.15,9.11)                 | 2.09 (1.67,2.61) | 555                   | 3.85 (3.54,4.18)                 | 0.93 (0.69,1.25) |
| Chronic pulmonary disease           | 77             | 0.55 (0.44,0.69)                 | 183          | 1.36 (1.17,1.56)                 | 2.46 (1.17,5.14)       | 442                     | 3.22 (2.93,3.53)                 | (3.07,11.15)         | 234              | 1.69 (1.48,1.91)                 | 3.06 (1.83,5.12) | 125                   | 0.89 (0.75,1.06)                 | 1.62 (0.92,2.86) |
| Acute respiratory distress syndrome | 126            | 0.89 (0.74,1.05)                 | 899          | 6.51 (6.09,6.95)                 | (4.84,10.95)           | 469                     | 3.35 (3.06,3.66)                 | 3.76 (2.25,6.27)     | 288              | 2.04 (1.81,2.28)                 | 2.29 (1.47,3.59) | 250                   | 1.75 (1.54,1.98)                 | 1.97 (1.28,3.05) |
| Seizure                             | 59             | 0.41 (0.32,0.53)                 | 290          | 2.12 (1.88,2.37)                 | (2.56,10.18)           | 417                     | 2.99 (2.71,3.29)                 | (3.63,14.43)         | 139              | 0.98 (0.83,1.16)                 | 2.39 (1.30,4.37) | 181                   | 1.26 (1.09,1.45)                 | 3.06 (1.34,6.96) |
| End-stage renal disease             | 17             | 0.12 (0.07,0.18)                 | 84           | 0.60 (0.48,0.74)                 | (1.98,13.09)           | 12                      | 0.08 (0.04,0.14)                 | 0.70 (0.09,5.45)     | 56               | 0.39 (0.30,0.50)                 | 3.33 (1.21,9.22) | 13                    | 0.09 (0.05,0.15)                 | 0.78 (0.17,3.53) |
| Acute kidney injury                 | 42             | 0.30 (0.22,0.40)                 | 411          | 2.97 (2.69,3.27)                 | (5.55,17.98)           | 569                     | 4.06 (3.74,4.40)                 | (7.44,25.21)         | 190              | 1.34 (1.16,1.54)                 | 4.54 (2.44,8.45) | 154                   | 1.07 (0.92,1.26)                 | 3.63 (1.97,6.71) |
| Pancreatitis                        | 22             | 0.15 (0.10,0.23)                 | 158          | 1.13 (0.96,1.32)                 | (2.66,20.14)           | 116                     | 0.82 (0.68,0.98)                 | (1.44,19.68)         | 67               | 0.47 (0.37,0.60)                 | 3.06 (1.15,8.10) | 100                   | 0.70 (0.57,0.85)                 | 4.53 (2.13,9.63) |
| All-cause mortality                 | 2,939          | 20.50<br>(19.77,21.25)           | 56,318       | 403.37<br>(400.04,406.71)        | 19.59<br>(18.45,20.81) | 27,226                  | 192.67<br>(190.39,194.97)        | 9.38<br>(8.69,10.13) | 12,213           | 85.67<br>(84.16,87.20)           | 4.18 (3.86,4.52) | 4,792                 | 33.25<br>(32.32,34.20)           | 1.62 (1.41,1.86) |

Note: CI: confidence interval, REF: Reference group; Major CVD: Major Cardiovascular Disease; Composite outcome of stroke, heart failure and coronary artery disease  
Hazard Ratio (HR) and 95% Confidence Interval (95% CI) were estimated by Cox regression, HR >1 (or <1) indicates patients with COVID-19 had higher (lower) risk of sequelae compared to the non-COVID-19 control cohort  
Un-vaccinated, Incomplete vaccinated, Fully Vaccinated and Received booster dose of COVID-19 vaccines refers to patients who have received 0 dose, 1 doses, 2 doses and ≥3 doses of BioNtech or CoronaVac COVID-19 vaccines, respectively

**Supplementary Table 17. Incidence rate and hazard ratio of clinical sequelae in COVID-19 and non-COVID-19 cohort after weighting during 0-30, 31-90, 91-180, 181-270, 271-365 days of SARS-CoV-2 infection (Male patients; continued)**

**30-90 days**

| Clinical sequelae                   | Controls (REF) |                                  | COVID-19     |                                  |                   |                         |                                  |                   |                  |                                  |                  |                       |                                  |                  |
|-------------------------------------|----------------|----------------------------------|--------------|----------------------------------|-------------------|-------------------------|----------------------------------|-------------------|------------------|----------------------------------|------------------|-----------------------|----------------------------------|------------------|
|                                     | Event          | Incidence per 1,000 person-years | Unvaccinated |                                  |                   | Incompletely vaccinated |                                  |                   | Fully vaccinated |                                  |                  | Received booster dose |                                  |                  |
|                                     |                |                                  | Event        | Incidence per 1,000 person-years | Hazard ratio      | Event                   | Incidence per 1,000 person-years | Hazard ratio      | Event            | Incidence per 1,000 person-years | Hazard ratio     | Event                 | Incidence per 1,000 person-years | Hazard ratio     |
| Major CVD                           | 1,875          | 7.41 (7.08,7.75)                 | 2,798        | 11.54                            |                   | 2,505                   | 10.06                            |                   | 1,868            | 7.41 (7.08,7.76)                 | 1.00 (0.86,1.17) | 2,012                 | 7.94 (7.61,8.30)                 | 1.07 (0.93,1.23) |
| Stroke                              | 959            | 3.57 (3.35,3.80)                 | 1,355        | 5.29 (5.02,5.58)                 | 1.56 (1.27,1.92)  | 1,473                   | 5.60 (5.32,5.89)                 | 1.57 (1.16,2.12)  | 1,002            | 3.76 (3.53,3.99)                 | 1.05 (0.84,1.31) | 818                   | 3.04 (2.84,3.25)                 | 0.85 (0.69,1.05) |
| Myocardial infarction               | 490            | 1.77 (1.61,1.93)                 | 537          | 1.99 (1.83,2.17)                 | 1.13 (0.73,1.76)  | 497                     | 1.82 (1.66,1.98)                 | 1.03 (0.61,1.74)  | 489              | 1.77 (1.62,1.94)                 | 1.00 (0.74,1.36) | 530                   | 1.91 (1.75,2.08)                 | 1.08 (0.81,1.43) |
| Heart Failure                       | 348            | 1.26 (1.13,1.39)                 | 1,027        | 3.83 (3.60,4.07)                 | 3.05 (2.24,4.15)  | 523                     | 1.91 (1.75,2.08)                 | 1.52 (0.98,2.37)  | 471              | 1.71 (1.56,1.87)                 | 1.36 (0.99,1.88) | 451                   | 1.62 (1.48,1.78)                 | 1.29 (0.93,1.79) |
| Atrial fibrillation                 | 233            | 0.85 (0.74,0.96)                 | 600          | 2.26 (2.08,2.44)                 | 2.66 (1.72,4.13)  | 277                     | 1.02 (0.91,1.15)                 | 1.21 (0.64,2.29)  | 354              | 1.29 (1.16,1.43)                 | 1.53 (1.06,2.20) | 261                   | 0.95 (0.84,1.07)                 | 1.12 (0.75,1.67) |
| Coronary Artery Disease             | 893            | 3.37 (3.16,3.60)                 | 1,334        | 5.15 (4.88,5.43)                 | 1.53 (1.14,2.05)  | 1,027                   | 3.90 (3.67,4.15)                 | 1.16 (0.81,1.66)  | 844              | 3.19 (2.98,3.41)                 | 0.95 (0.75,1.19) | 1,134                 | 4.29 (4.04,4.54)                 | 1.27 (1.05,1.54) |
| Deep vein thrombosis                | 41             | 0.15 (0.11,0.19)                 | 274          | 1.01 (0.90,1.13)                 | 6.92 (3.26,14.69) | 40                      | 0.14 (0.10,0.19)                 | 0.99 (0.23,4.29)  | 115              | 0.41 (0.34,0.49)                 | 2.83 (1.41,5.69) | 58                    | 0.21 (0.16,0.27)                 | 1.42 (0.61,3.32) |
| Cardiovascular mortality            | 742            | 2.65 (2.46,2.84)                 | 1,004        | 3.68 (3.46,3.92)                 | 1.39 (1.03,1.88)  | 880                     | 3.18 (2.97,3.39)                 | 1.20 (0.86,1.68)  | 702              | 2.52 (2.33,2.71)                 | 0.95 (0.72,1.25) | 385                   | 1.37 (1.24,1.51)                 | 0.52 (0.35,0.77) |
| Chronic pulmonary disease           | 192            | 0.70 (0.61,0.81)                 | 738          | 2.80 (2.60,3.01)                 | 3.98 (2.61,6.08)  | 412                     | 1.54 (1.39,1.69)                 | 2.19 (1.17,4.10)  | 216              | 0.79 (0.69,0.90)                 | 1.13 (0.71,1.80) | 194                   | 0.71 (0.62,0.82)                 | 1.01 (0.64,1.59) |
| Acute respiratory distress syndrome | 320            | 1.15 (1.03,1.28)                 | 510          | 1.89 (1.73,2.06)                 | 1.64 (1.00,2.70)  | 497                     | 1.81 (1.65,1.97)                 | 1.57 (0.96,2.58)  | 389              | 1.40 (1.27,1.55)                 | 1.22 (0.85,1.76) | 418                   | 1.50 (1.36,1.65)                 | 1.30 (0.89,1.91) |
| Seizure                             | 161            | 0.58 (0.49,0.67)                 | 304          | 1.14 (1.02,1.27)                 | 1.98 (1.00,3.90)  | 237                     | 0.87 (0.76,0.98)                 | 1.50 (0.68,3.32)  | 224              | 0.81 (0.71,0.92)                 | 1.40 (0.89,2.22) | 100                   | 0.36 (0.29,0.44)                 | 0.62 (0.32,1.21) |
| End-stage renal disease             | 28             | 0.10 (0.07,0.14)                 | 70           | 0.26 (0.20,0.33)                 | 2.58 (0.63,10.54) | 141                     | 0.51 (0.43,0.60)                 | 5.08 (1.80,14.34) | 22               | 0.08 (0.05,0.12)                 | 0.78 (0.16,3.70) | 14                    | 0.05 (0.03,0.08)                 | 0.48 (0.11,2.13) |
| Acute kidney injury                 | 102            | 0.37 (0.30,0.44)                 | 385          | 1.43 (1.29,1.57)                 | 3.87 (2.18,6.90)  | 353                     | 1.28 (1.15,1.42)                 | 3.50 (1.84,6.64)  | 114              | 0.41 (0.34,0.49)                 | 1.12 (0.60,2.11) | 118                   | 0.42 (0.35,0.51)                 | 1.15 (0.61,2.18) |
| Pancreatitis                        | 71             | 0.25 (0.20,0.32)                 | 240          | 0.88 (0.77,1.00)                 | 3.49 (1.55,7.84)  | 149                     | 0.54 (0.46,0.63)                 | 2.14 (0.82,5.59)  | 60               | 0.22 (0.17,0.28)                 | 0.85 (0.35,2.06) | 97                    | 0.35 (0.28,0.42)                 | 1.36 (0.73,2.55) |
| All-cause mortality                 | 4,237          | 15.11 (14.66,15.57)              | 15,906       | 58.38 (57.48,59.29)              | 3.85 (3.54,4.19)  | 7,648                   | 27.62 (27.01,28.25)              | 1.83 (1.62,2.06)  | 4,642            | 16.65 (16.17,17.13)              | 1.10 (0.99,1.23) | 3,532                 | 12.58 (12.17,13.00)              | 0.83 (0.71,0.97) |

Note: CI: confidence interval, REF: Reference group; Major CVD: Major Cardiovascular Disease; Composite outcome of stroke, heart failure and coronary artery disease

Hazard Ratio (HR) and 95% Confidence Interval (95% CI) were estimated by Cox regression, HR >1 (or <1) indicates patients with COVID-19 had higher (lower) risk of sequelae compared to the non-COVID-19 control cohort

Un-vaccinated, Incomplete vaccinated, Fully Vaccinated and Received booster dose of COVID-19 vaccines refers to patients who have received 0 dose, 1 doses, 2 doses and ≥3 doses of BioNtech or CoronaVac COVID-19 vaccines, respectively

**Supplementary Table 17. Incidence rate and hazard ratio of clinical sequelae in COVID-19 and non-COVID-19 cohort after weighting during 0-30, 31-90, 91-180, 181-270, 271-365 days of SARS-CoV-2 infection (Male patients; continued)**

**91-180 days**

| Clinical sequelae                   | Controls (REF) |                                  | COVID-19 |                                  |                   |       |                                  |                   |       |                                  |                  |       |                                  |                  |
|-------------------------------------|----------------|----------------------------------|----------|----------------------------------|-------------------|-------|----------------------------------|-------------------|-------|----------------------------------|------------------|-------|----------------------------------|------------------|
|                                     | Event          | Incidence per 1,000 person-years | Event    | Incidence per 1,000 person-years | Hazard ratio      | Event | Incidence per 1,000 person-years | Hazard ratio      | Event | Incidence per 1,000 person-years | Hazard ratio     | Event | Incidence per 1,000 person-years | Hazard ratio     |
| Major CVD                           | 2,475          | 7.54 (7.25,7.84)                 | 3,615    | 10.63 (10.29,10.98)              | 1.42 (1.17,1.72)  | 3,296 | 9.08 (8.77,9.39)                 | 1.21 (0.99,1.49)  | 2,908 | 8.04 (7.76,8.34)                 | 1.07 (0.95,1.22) | 1,924 | 6.81 (6.51,7.11)                 | 0.89 (0.78,1.02) |
| Stroke                              | 1,328          | 3.82 (3.62,4.03)                 | 1,856    | 5.16 (4.93,5.40)                 | 1.36 (1.04,1.78)  | 1,714 | 4.47 (4.26,4.68)                 | 1.18 (0.89,1.57)  | 1,576 | 4.12 (3.92,4.33)                 | 1.09 (0.91,1.29) | 956   | 3.19 (3.00,3.40)                 | 0.83 (0.68,1.00) |
| Myocardial infarction               | 653            | 1.81 (1.68,1.96)                 | 689      | 1.82 (1.68,1.96)                 | 1.00 (0.66,1.53)  | 580   | 1.45 (1.34,1.57)                 | 0.80 (0.50,1.28)  | 671   | 1.70 (1.57,1.83)                 | 0.94 (0.72,1.22) | 611   | 1.98 (1.83,2.15)                 | 1.09 (0.84,1.42) |
| Heart Failure                       | 392            | 1.09 (0.99,1.20)                 | 1,299    | 3.44 (3.26,3.63)                 | 3.18 (2.35,4.31)  | 839   | 2.10 (1.96,2.25)                 | 1.95 (1.31,2.91)  | 624   | 1.58 (1.46,1.71)                 | 1.47 (1.10,1.95) | 328   | 1.06 (0.95,1.18)                 | 0.96 (0.67,1.36) |
| Atrial fibrillation                 | 340            | 0.95 (0.85,1.06)                 | 458      | 1.22 (1.11,1.34)                 | 1.28 (0.79,2.08)  | 618   | 1.56 (1.44,1.69)                 | 1.63 (1.05,2.53)  | 543   | 1.38 (1.27,1.50)                 | 1.45 (1.07,1.96) | 383   | 1.25 (1.13,1.38)                 | 1.33 (0.90,1.96) |
| Coronary Artery Disease             | 1,181          | 3.43 (3.24,3.63)                 | 1,455    | 3.99 (3.79,4.20)                 | 1.16 (0.87,1.56)  | 1,589 | 4.14 (3.94,4.35)                 | 1.21 (0.91,1.61)  | 1,326 | 3.50 (3.31,3.69)                 | 1.02 (0.85,1.23) | 1,009 | 3.43 (3.22,3.64)                 | 0.99 (0.82,1.21) |
| Deep vein thrombosis                | 66             | 0.18 (0.14,0.23)                 | 42       | 0.11 (0.08,0.15)                 | 0.60 (0.14,2.59)  | 78    | 0.19 (0.16,0.24)                 | 1.06 (0.32,3.45)  | 43    | 0.11 (0.08,0.14)                 | 0.58 (0.20,1.67) | 107   | 0.34 (0.28,0.42)                 | 1.95 (0.79,4.82) |
| Cardiovascular mortality            | 885            | 2.43 (2.28,2.60)                 | 1,249    | 3.26 (3.08,3.44)                 | 1.33 (1.01,1.77)  | 722   | 1.79 (1.66,1.92)                 | 0.73 (0.49,1.09)  | 706   | 1.77 (1.64,1.90)                 | 0.72 (0.56,0.94) | 208   | 0.67 (0.58,0.76)                 | 0.28 (0.17,0.45) |
| Chronic pulmonary disease           | 268            | 0.75 (0.67,0.85)                 | 577      | 1.56 (1.43,1.69)                 | 2.08 (1.30,3.34)  | 430   | 1.10 (1.00,1.21)                 | 1.47 (0.83,2.61)  | 347   | 0.89 (0.80,0.99)                 | 1.19 (0.82,1.73) | 286   | 0.94 (0.84,1.05)                 | 1.22 (0.79,1.89) |
| Acute respiratory distress syndrome | 426            | 1.18 (1.07,1.30)                 | 814      | 2.15 (2.00,2.30)                 | 1.81 (1.21,2.72)  | 490   | 1.22 (1.12,1.33)                 | 1.03 (0.61,1.73)  | 536   | 1.35 (1.24,1.47)                 | 1.14 (0.84,1.54) | 389   | 1.25 (1.13,1.38)                 | 1.07 (0.75,1.54) |
| Seizure                             | 209            | 0.58 (0.50,0.66)                 | 649      | 1.73 (1.60,1.86)                 | 3.02 (1.90,4.82)  | 448   | 1.12 (1.02,1.23)                 | 1.98 (1.13,3.48)  | 199   | 0.50 (0.44,0.58)                 | 0.88 (0.56,1.40) | 198   | 0.64 (0.55,0.73)                 | 1.07 (0.50,2.30) |
| End-stage renal disease             | 26             | 0.07 (0.05,0.10)                 | 77       | 0.20 (0.16,0.25)                 | 2.89 (0.66,12.73) | 167   | 0.41 (0.36,0.48)                 | 5.99 (2.02,17.82) | 17    | 0.04 (0.03,0.07)                 | 0.62 (0.14,2.77) | 0     | NA                               | NA               |
| Acute kidney injury                 | 190            | 0.52 (0.45,0.60)                 | 344      | 0.91 (0.81,1.01)                 | 1.73 (0.99,3.03)  | 376   | 0.94 (0.84,1.03)                 | 1.79 (1.05,3.03)  | 251   | 0.63 (0.56,0.71)                 | 1.20 (0.76,1.90) | 73    | 0.24 (0.19,0.30)                 | 0.45 (0.22,0.91) |
| Pancreatitis                        | 95             | 0.26 (0.21,0.32)                 | 102      | 0.27 (0.22,0.32)                 | 1.02 (0.37,2.81)  | 146   | 0.36 (0.31,0.42)                 | 1.37 (0.46,4.11)  | 104   | 0.26 (0.22,0.32)                 | 0.99 (0.50,1.97) | 69    | 0.22 (0.18,0.28)                 | 0.86 (0.39,1.88) |
| All-cause mortality                 | 5,495          | 15.10 (14.71,15.51)              | 12,004   | 31.30 (30.74,31.86)              | 2.07 (1.88,2.28)  | 7,195 | 17.80 (17.39,18.21)              | 1.18 (1.04,1.34)  | 4,760 | 11.91 (11.57,12.25)              | 0.79 (0.71,0.88) | 3,271 | 10.50 (10.14,10.86)              | 0.69 (0.59,0.82) |

Note: CI: confidence interval, REF: Reference group; Major CVD: Major Cardiovascular Disease; Composite outcome of stroke, heart failure and coronary artery disease

Hazard Ratio (HR) and 95% Confidence Interval (95% CI) were estimated by Cox regression, HR >1 (or <1) indicates patients with COVID-19 had higher (lower) risk of sequelae compared to the non-COVID-19 control cohort

Un-vaccinated, Incomplete vaccinated, Fully Vaccinated and Received booster dose of COVID-19 vaccines refers to patients who have received 0 dose, 1 doses, 2 doses and ≥3 doses of BioNtech or CoronaVac COVID-19 vaccines, respectively



**Supplementary Table 17. Incidence rate and hazard ratio of clinical sequelae in COVID-19 and non-COVID-19 cohort after weighting during 0-30, 31-90, 91-180, 181-270, 271-365 days of SARS-CoV-2 infection (Male patients; continued)**

**181-270 days**

| Clinical sequelae                   | Controls (REF) |                                  | COVID-19 |                                  |                  |       |                                  |                  |       |                                  |                  |       |                                  |                  |
|-------------------------------------|----------------|----------------------------------|----------|----------------------------------|------------------|-------|----------------------------------|------------------|-------|----------------------------------|------------------|-------|----------------------------------|------------------|
|                                     | Event          | Incidence per 1,000 person-years | Event    | Incidence per 1,000 person-years | Hazard ratio     | Event | Incidence per 1,000 person-years | Hazard ratio     | Event | Incidence per 1,000 person-years | Hazard ratio     | Event | Incidence per 1,000 person-years | Hazard ratio     |
| Major CVD                           | 2,056          | 7.92 (7.58,8.27)                 | 2,804    | 10.80 (10.40,11.20)              | 1.36 (1.11,1.67) | 2,578 | 9.46 (9.10,9.83)                 | 1.19 (0.97,1.48) | 2,131 | 7.88 (7.55,8.22)                 | 0.99 (0.87,1.14) | 1,545 | 6.76 (6.43,7.11)                 | 0.85 (0.71,1.03) |
| Stroke                              | 1,040          | 3.78 (3.55,4.01)                 | 1,565    | 5.70 (5.42,5.99)                 | 1.51 (1.15,1.98) | 1,096 | 3.81 (3.59,4.04)                 | 1.01 (0.73,1.40) | 1,070 | 3.74 (3.52,3.97)                 | 0.99 (0.82,1.20) | 661   | 2.72 (2.52,2.93)                 | 0.72 (0.54,0.95) |
| Myocardial infarction               | 583            | 2.05 (1.89,2.22)                 | 571      | 1.97 (1.81,2.14)                 | 0.96 (0.64,1.45) | 744   | 2.48 (2.31,2.66)                 | 1.21 (0.82,1.78) | 432   | 1.46 (1.33,1.61)                 | 0.71 (0.53,0.95) | 537   | 2.14 (1.97,2.33)                 | 1.05 (0.62,1.78) |
| Heart Failure                       | 388            | 1.36 (1.23,1.51)                 | 796      | 2.76 (2.57,2.96)                 | 2.02 (1.41,2.89) | 755   | 2.52 (2.34,2.70)                 | 1.85 (1.27,2.69) | 457   | 1.55 (1.41,1.69)                 | 1.13 (0.84,1.54) | 257   | 1.02 (0.91,1.16)                 | 0.75 (0.46,1.23) |
| Atrial fibrillation                 | 277            | 0.98 (0.87,1.10)                 | 351      | 1.23 (1.11,1.36)                 | 1.26 (0.72,2.19) | 299   | 1.01 (0.90,1.12)                 | 1.03 (0.57,1.85) | 375   | 1.28 (1.15,1.41)                 | 1.31 (0.94,1.82) | 160   | 0.64 (0.55,0.75)                 | 0.65 (0.36,1.15) |
| Coronary Artery Disease             | 1,030          | 3.79 (3.56,4.02)                 | 1,147    | 4.11 (3.88,4.36)                 | 1.09 (0.80,1.47) | 1,325 | 4.60 (4.36,4.85)                 | 1.21 (0.91,1.62) | 1,030 | 3.63 (3.42,3.86)                 | 0.96 (0.79,1.16) | 869   | 3.64 (3.40,3.88)                 | 0.96 (0.75,1.23) |
| Deep vein thrombosis                | 44             | 0.15 (0.11,0.21)                 | 46       | 0.16 (0.12,0.21)                 | 1.02 (0.33,3.09) | 46    | 0.15 (0.11,0.20)                 | 0.97 (0.33,2.88) | 69    | 0.23 (0.18,0.29)                 | 1.48 (0.69,3.15) | 48    | 0.19 (0.14,0.25)                 | 1.24 (0.43,3.56) |
| Cardiovascular mortality            | 535            | 1.86 (1.71,2.02)                 | 898      | 3.06 (2.87,3.27)                 | 1.65 (1.20,2.26) | 588   | 1.94 (1.78,2.10)                 | 1.04 (0.70,1.55) | 311   | 1.04 (0.93,1.16)                 | 0.56 (0.39,0.81) | 207   | 0.82 (0.71,0.93)                 | 0.43 (0.25,0.76) |
| Chronic pulmonary disease           | 227            | 0.81 (0.71,0.92)                 | 489      | 1.72 (1.58,1.88)                 | 2.14 (1.32,3.47) | 345   | 1.17 (1.05,1.30)                 | 1.45 (0.83,2.55) | 208   | 0.71 (0.62,0.81)                 | 0.88 (0.57,1.38) | 84    | 0.34 (0.27,0.42)                 | 0.42 (0.21,0.86) |
| Acute respiratory distress syndrome | 346            | 1.21 (1.09,1.34)                 | 389      | 1.34 (1.21,1.48)                 | 1.11 (0.66,1.87) | 420   | 1.39 (1.26,1.53)                 | 1.15 (0.69,1.91) | 279   | 0.94 (0.83,1.05)                 | 0.78 (0.54,1.12) | 200   | 0.80 (0.69,0.91)                 | 0.66 (0.22,2.02) |
| Seizure                             | 180            | 0.63 (0.54,0.72)                 | 629      | 2.19 (2.02,2.37)                 | 3.49 (2.22,5.47) | 484   | 1.62 (1.48,1.77)                 | 2.57 (1.48,4.46) | 185   | 0.62 (0.54,0.72)                 | 0.99 (0.63,1.55) | 160   | 0.63 (0.54,0.73)                 | 1.00 (0.34,2.97) |
| End-stage renal disease             | 31             | 0.11 (0.07,0.15)                 | 36       | 0.12 (0.09,0.17)                 | 1.12 (0.24,5.25) | 50    | 0.16 (0.12,0.21)                 | 1.52 (0.48,4.79) | 50    | 0.17 (0.12,0.22)                 | 1.53 (0.61,3.88) | 0     | NA                               | NA               |
| Acute kidney injury                 | 157            | 0.55 (0.47,0.64)                 | 240      | 0.83 (0.73,0.94)                 | 1.51 (0.84,2.71) | 167   | 0.55 (0.47,0.64)                 | 1.01 (0.49,2.07) | 156   | 0.52 (0.45,0.61)                 | 0.95 (0.57,1.60) | 73    | 0.29 (0.23,0.36)                 | 0.52 (0.22,1.21) |
| Pancreatitis                        | 83             | 0.29 (0.23,0.36)                 | 113      | 0.39 (0.32,0.46)                 | 1.34 (0.50,3.56) | 115   | 0.38 (0.32,0.46)                 | 1.32 (0.45,3.88) | 58    | 0.20 (0.15,0.25)                 | 0.68 (0.31,1.48) | 39    | 0.15 (0.11,0.21)                 | 0.52 (0.19,1.45) |
| All-cause mortality                 | 4,316          | 14.99 (14.55,15.45)              | 8,882    | 30.29 (29.67,30.93)              | 2.02 (1.82,2.24) | 5,229 | 17.22 (16.76,17.69)              | 1.15 (1.01,1.31) | 3,043 | 10.18 (9.82,10.54)               | 0.68 (0.60,0.77) | 3,845 | 15.14 (14.66,15.62)              | 1.01 (0.65,1.56) |

Note: CI: confidence interval, REF: Reference group; Major CVD: Major Cardiovascular Disease; Composite outcome of stroke, heart failure and coronary artery disease

Hazard Ratio (HR) and 95% Confidence Interval (95% CI) were estimated by Cox regression, HR >1 (or <1) indicates patients with COVID-19 had higher (lower) risk of sequelae compared to the non-COVID-19 control cohort

Un-vaccinated, Incomplete vaccinated, Fully Vaccinated and Received booster dose of COVID-19 vaccines refers to patients who have received 0 dose, 1 doses, 2 doses and ≥3 doses of BioNtech or CoronaVac COVID-19 vaccines, respectively

**Supplementary Table 17. Incidence rate and hazard ratio of clinical sequelae in COVID-19 and non-COVID-19 cohort after weighting during 0-30, 31-90, 91-180, 181-270, 271-365 days of SARS-CoV-2 infection (Male patients; continued)**

**271-365 days**

| Clinical sequelae                   | Controls (REF) |                                  | COVID-19 |                                  |                   |       |                                  |                   |       |                                  |                  |       |                                  |                   |
|-------------------------------------|----------------|----------------------------------|----------|----------------------------------|-------------------|-------|----------------------------------|-------------------|-------|----------------------------------|------------------|-------|----------------------------------|-------------------|
|                                     | Event          | Incidence per 1,000 person-years | Event    | Incidence per 1,000 person-years | Hazard ratio      | Event | Incidence per 1,000 person-years | Hazard ratio      | Event | Incidence per 1,000 person-years | Hazard ratio     | Event | Incidence per 1,000 person-years | Hazard ratio      |
| Major CVD                           | 1,230          | 8.15 (7.70,8.61)                 | 1,260    | 7.93 (7.51,8.38)                 | 1.05 (0.79,1.39)  | 1,406 | 9.69 (9.19,10.21)                | 1.18 (0.88,1.56)  | 1,094 | 7.32 (6.89,7.76)                 | 0.89 (0.75,1.07) | 962   | 6.65 (6.24,7.08)                 | 0.80 (0.62,1.04)  |
| Stroke                              | 590            | 3.68 (3.39,3.99)                 | 567      | 3.40 (3.13,3.69)                 | 0.98 (0.65,1.49)  | 488   | 3.18 (2.91,3.47)                 | 0.85 (0.53,1.37)  | 578   | 3.66 (3.37,3.96)                 | 0.99 (0.76,1.28) | 474   | 3.06 (2.80,3.35)                 | 0.82 (0.56,1.19)  |
| Myocardial infarction               | 338            | 2.04 (1.83,2.27)                 | 285      | 1.63 (1.45,1.83)                 | 0.86 (0.49,1.51)  | 445   | 2.80 (2.55,3.07)                 | 1.35 (0.82,2.23)  | 304   | 1.87 (1.67,2.09)                 | 0.91 (0.63,1.31) | 201   | 1.26 (1.09,1.44)                 | 0.60 (0.36,1.01)  |
| Heart Failure                       | 300            | 1.81 (1.61,2.02)                 | 453      | 2.60 (2.36,2.84)                 | 1.54 (0.99,2.39)  | 478   | 3.00 (2.74,3.28)                 | 1.64 (1.02,2.62)  | 332   | 2.04 (1.82,2.26)                 | 1.12 (0.77,1.62) | 208   | 1.30 (1.13,1.48)                 | 0.71 (0.30,1.68)  |
| Atrial fibrillation                 | 153            | 0.93 (0.79,1.08)                 | 225      | 1.30 (1.14,1.48)                 | 1.45 (0.74,2.84)  | 201   | 1.27 (1.10,1.46)                 | 1.37 (0.63,2.95)  | 166   | 1.03 (0.88,1.19)                 | 1.10 (0.67,1.79) | 127   | 0.80 (0.67,0.94)                 | 0.85 (0.36,2.03)  |
| Coronary Artery Disease             | 592            | 3.75 (3.45,4.06)                 | 512      | 3.03 (2.78,3.30)                 | 0.85 (0.55,1.31)  | 628   | 4.11 (3.79,4.44)                 | 1.09 (0.71,1.67)  | 478   | 3.06 (2.79,3.34)                 | 0.81 (0.62,1.07) | 493   | 3.24 (2.97,3.54)                 | 0.86 (0.56,1.30)  |
| Deep vein thrombosis                | 27             | 0.16 (0.11,0.24)                 | 58       | 0.33 (0.25,0.42)                 | 2.20 (0.58,8.34)  | 0     | NA                               | NA                | 24    | 0.15 (0.10,0.22)                 | 0.91 (0.27,3.11) | 13    | 0.08 (0.05,0.14)                 | 0.50 (0.07,3.72)  |
| Cardiovascular mortality            | 55             | 0.33 (0.25,0.43)                 | 76       | 0.43 (0.34,0.53)                 | 1.30 (0.38,4.47)  | 29    | 0.18 (0.12,0.25)                 | 0.54 (0.13,2.24)  | 8     | 0.05 (0.02,0.09)                 | 0.14 (0.02,1.03) | 0     | NA                               | NA                |
| Chronic pulmonary disease           | 184            | 1.12 (0.97,1.29)                 | 207      | 1.21 (1.05,1.38)                 | 1.14 (0.56,2.35)  | 279   | 1.78 (1.58,2.00)                 | 1.57 (0.80,3.10)  | 241   | 1.50 (1.31,1.69)                 | 1.33 (0.86,2.04) | 94    | 0.60 (0.49,0.73)                 | 0.52 (0.25,1.07)  |
| Acute respiratory distress syndrome | 161            | 0.97 (0.82,1.12)                 | 310      | 1.77 (1.58,1.97)                 | 1.97 (1.07,3.63)  | 259   | 1.62 (1.43,1.83)                 | 1.65 (0.90,3.04)  | 192   | 1.17 (1.02,1.35)                 | 1.20 (0.75,1.92) | 348   | 2.17 (1.95,2.41)                 | 2.20 (0.66,7.32)  |
| Seizure                             | 103            | 0.62 (0.51,0.75)                 | 163      | 0.94 (0.81,1.09)                 | 1.64 (0.74,3.63)  | 163   | 1.03 (0.88,1.20)                 | 1.63 (0.69,3.89)  | 90    | 0.55 (0.45,0.68)                 | 0.88 (0.49,1.58) | 77    | 0.47 (0.38,0.59)                 | 0.75 (0.18,3.18)  |
| End-stage renal disease             | 26             | 0.16 (0.11,0.23)                 | 114      | 0.64 (0.53,0.77)                 | 4.52 (1.48,13.83) | 22    | 0.13 (0.09,0.20)                 | 0.84 (0.11,6.47)  | 4     | 0.03 (0.01,0.06)                 | 0.17 (0.02,1.33) | 42    | 0.26 (0.19,0.34)                 | 1.60 (0.21,12.34) |
| Acute kidney injury                 | 91             | 0.55 (0.44,0.66)                 | 145      | 0.83 (0.70,0.97)                 | 1.63 (0.76,3.46)  | 43    | 0.27 (0.19,0.35)                 | 0.48 (0.11,2.08)  | 42    | 0.25 (0.18,0.34)                 | 0.46 (0.20,1.08) | 50    | 0.31 (0.24,0.41)                 | 0.56 (0.20,1.52)  |
| Pancreatitis                        | 27             | 0.16 (0.11,0.24)                 | 146      | 0.83 (0.70,0.97)                 | 5.56 (2.20,14.04) | 52    | 0.32 (0.25,0.42)                 | 1.96 (0.37,10.42) | 21    | 0.13 (0.08,0.20)                 | 0.78 (0.23,2.69) | 0     | NA                               | NA                |
| All-cause mortality                 | 2,580          | 15.43 (14.85,16.04)              | 5,274    | 29.83 (29.03,30.64)              | 2.06 (1.80,2.35)  | 2,737 | 17.00 (16.37,17.64)              | 1.09 (0.91,1.30)  | 1,948 | 11.82 (11.30,12.35)              | 0.76 (0.66,0.88) | 843   | 5.20 (4.85,5.56)                 | 0.33 (0.21,0.54)  |

Note: CI: confidence interval, REF: Reference group; Major CVD: Major Cardiovascular Disease; Composite outcome of stroke, heart failure and coronary artery disease

Hazard Ratio (HR) and 95% Confidence Interval (95% CI) were estimated by Cox regression, HR >1 (or <1) indicates patients with COVID-19 had higher (lower) risk of sequelae compared to the non-COVID-19 control cohort

Un-vaccinated, Incomplete vaccinated, Fully Vaccinated and Received booster dose of COVID-19 vaccines refers to patients who have received 0 dose, 1 doses, 2 doses and ≥3 doses of BioNtech or CoronaVac COVID-19 vaccines, respectively

**Supplementary Table 18. Incidence rate and hazard ratio of clinical sequelae in COVID-19 and non-COVID-19 cohort after weighting during 0-30, 31-90, 91-180, 181-270, 271-365 days of SARS-CoV-2 infection (Female patients)**

**0-30 days**

| Clinical sequelae                   | Controls (REF) |                                  |        | COVID-19                  |                                  |              |                           |                                  |              |                        |                                  |              |                        |                                  |              |
|-------------------------------------|----------------|----------------------------------|--------|---------------------------|----------------------------------|--------------|---------------------------|----------------------------------|--------------|------------------------|----------------------------------|--------------|------------------------|----------------------------------|--------------|
|                                     | Event          | Incidence per 1,000 person-years | Event  | Unvaccinated              |                                  |              | Incompletely vaccinated   |                                  |              | Fully vaccinated       |                                  |              | Received booster dose  |                                  |              |
|                                     |                |                                  |        | Event                     | Incidence per 1,000 person-years | Hazard ratio | Event                     | Incidence per 1,000 person-years | Hazard ratio | Event                  | Incidence per 1,000 person-years | Hazard ratio | Event                  | Incidence per 1,000 person-years | Hazard ratio |
| Major CVD                           | 572            | 3.35 (3.08,3.63)                 | 2,710  | 16.28<br>(15.68,16.90)    | 4.84 (3.91,5.99)                 | 2,064        | 12.32<br>(11.80,12.86)    | 3.67 (2.85,4.73)                 | 1,445        | 8.50 (8.07,8.94)       | 2.54 (2.07,3.11)                 | 1,143        | 6.64 (6.26,7.03)       | 1.98 (1.54,2.55)                 |              |
| Stroke                              | 386            | 2.20 (1.99,2.42)                 | 1,831  | 10.68<br>(10.20,11.18)    | 4.84 (3.73,6.28)                 | 1,141        | 6.62 (6.24,7.01)          | 3.00 (2.16,4.18)                 | 970          | 5.54 (5.20,5.90)       | 2.52 (1.96,3.24)                 | 857          | 4.80 (4.49,5.13)       | 2.18 (1.60,2.98)                 |              |
| Myocardial infarction               | 98             | 0.54 (0.44,0.66)                 | 826    | 4.65 (4.34,4.98)          | (5.75,12.57)                     | 779          | 4.38 (4.08,4.69)          | (5.19,12.41)                     | 366          | 2.03 (1.83,2.25)       | 3.74 (2.42,5.77)                 | 352          | 1.92 (1.73,2.13)       | 3.53 (2.23,5.61)                 |              |
| Heart Failure                       | 150            | 0.83 (0.71,0.98)                 | 630    | 3.58 (3.31,3.86)          | 4.28 (2.88,6.37)                 | 560          | 3.17 (2.91,3.43)          | 3.79 (2.35,6.13)                 | 361          | 2.02 (1.82,2.24)       | 2.42 (1.59,3.69)                 | 106          | 0.58 (0.48,0.70)       | 0.70 (0.33,1.50)                 |              |
| Atrial fibrillation                 | 69             | 0.38 (0.30,0.48)                 | 381    | 2.17 (1.96,2.40)          | 5.67 (3.29,9.78)                 | 308          | 1.75 (1.57,1.96)          | 4.57 (2.50,8.38)                 | 210          | 1.18 (1.02,1.34)       | 3.08 (1.76,5.37)                 | 285          | 1.57 (1.40,1.76)       | 4.10 (2.48,6.78)                 |              |
| Coronary Artery Disease             | 154            | 0.87 (0.74,1.01)                 | 869    | 4.99 (4.66,5.33)          | 5.72 (3.99,8.19)                 | 850          | 4.88 (4.56,5.21)          | 5.60 (3.79,8.29)                 | 421          | 2.39 (2.17,2.63)       | 2.75 (1.88,4.04)                 | 399          | 2.23 (2.02,2.46)       | 2.57 (1.71,3.86)                 |              |
| Deep vein thrombosis                | 30             | 0.16 (0.11,0.23)                 | 167    | 0.94 (0.81,1.09)          | (2.31,14.34)                     | 189          | 1.06 (0.92,1.22)          | (2.52,16.78)                     | 74           | 0.41 (0.33,0.52)       | 2.53 (1.00,6.40)                 | 41           | 0.22 (0.16,0.30)       | 1.37 (0.45,4.23)                 |              |
| Cardiovascular mortality            | 503            | 2.77 (2.54,3.02)                 | 2,682  | 15.04<br>(14.48,15.62)    | 5.41 (4.42,6.63)                 | 1,756        | 9.82<br>(9.37,10.29)      | 3.54 (2.74,4.57)                 | 854          | 4.73 (4.42,5.06)       | 1.71 (1.28,2.27)                 | 520          | 2.82 (2.58,3.06)       | 1.02 (0.63,1.64)                 |              |
| Chronic pulmonary disease           | 38             | 0.21 (0.16,0.29)                 | 185    | 1.06 (0.92,1.22)          | (2.23,11.00)                     | 241          | 1.37 (1.20,1.55)          | (2.75,15.03)                     | 166          | 0.93 (0.80,1.08)       | 4.38 (2.23,8.59)                 | 100          | 0.55 (0.45,0.67)       | 2.59 (1.26,5.32)                 |              |
| Acute respiratory distress syndrome | 63             | 0.35 (0.27,0.45)                 | 506    | 2.86 (2.62,3.11)          | (4.63,14.27)                     | 238          | 1.34 (1.17,1.51)          | 3.82 (1.89,7.70)                 | 157          | 0.87 (0.74,1.01)       | 2.49 (1.35,4.62)                 | 180          | 0.98 (0.85,1.13)       | 2.81 (1.52,5.19)                 |              |
| Seizure                             | 44             | 0.24 (0.18,0.33)                 | 454    | 2.58 (2.35,2.82)          | (5.63,19.54)                     | 150          | 0.84 (0.72,0.99)          | (1.18,10.04)                     | 96           | 0.53 (0.43,0.65)       | 2.18 (1.03,4.61)                 | 94           | 0.51 (0.41,0.62)       | 2.08 (0.97,4.48)                 |              |
| End-stage renal disease             | 22             | 0.12 (0.08,0.18)                 | 148    | 0.83 (0.71,0.98)          | (1.95,24.58)                     | 45           | 0.25 (0.18,0.33)          | (0.34,12.72)                     | 38           | 0.21 (0.15,0.29)       | 1.76 (0.37,8.38)                 | 86           | 0.47 (0.38,0.58)       | 3.90<br>(0.75,20.30)             |              |
| Acute kidney injury                 | 44             | 0.25 (0.18,0.33)                 | 394    | 2.22 (2.01,2.45)          | (5.05,16.15)                     | 246          | 1.38 (1.22,1.57)          | (2.83,11.23)                     | 126          | 0.70 (0.59,0.83)       | 2.85 (1.30,6.25)                 | 244          | 1.32 (1.16,1.50)       | 5.39<br>(2.70,10.77)             |              |
| Pancreatitis                        | 34             | 0.19 (0.13,0.26)                 | 117    | 0.66 (0.55,0.79)          | 3.51 (1.34,9.21)                 | 21           | 0.12 (0.08,0.18)          | 0.64 (0.09,4.72)                 | 77           | 0.43 (0.34,0.53)       | 2.28 (0.99,5.26)                 | 32           | 0.17 (0.12,0.24)       | 0.92 (0.31,2.69)                 |              |
| All-cause mortality                 | 2,447          | 13.48<br>(12.96,14.02)           | 43,370 | 243.23<br>(240.95,245.53) | 17.99<br>(16.86,19.20)           | 20,276       | 113.42<br>(111.87,114.99) | 8.40 (7.71,9.16)                 | 8,821        | 48.83<br>(47.82,49.85) | 3.62 (3.29,3.99)                 | 8,586        | 46.52<br>(45.55,47.51) | 3.45 (1.34,8.85)                 |              |

Note: CI: confidence interval, REF: Reference group; Major CVD: Major Cardiovascular Disease; Composite outcome of stroke, heart failure and coronary artery disease

Hazard Ratio (HR) and 95% Confidence Interval (95% CI) were estimated by Cox regression, HR >1 (or <1) indicates patients with COVID-19 had higher (lower) risk of sequelae compared to the non-COVID-19 control cohort

Un-vaccinated, Incomplete vaccinated, Fully Vaccinated and Received booster dose of COVID-19 vaccines refers to patients who have received 0 dose, 1 doses, 2 doses and ≥3 doses of BioNtech or CoronaVac COVID-19 vaccines, respectively

**Supplementary Table 18. Incidence rate and hazard ratio of clinical sequelae in COVID-19 and non-COVID-19 cohort after weighting during 0-30, 31-90, 91-180, 181-270, 271-365 days of SARS-CoV-2 infection (Female patients; continued)**

**31-90 days**

| Clinical sequelae                   | Controls (REF) |                                  |        | COVID-19                         |                  |       |                                  |                  |       |                                  |                  |       |                                  |                  |
|-------------------------------------|----------------|----------------------------------|--------|----------------------------------|------------------|-------|----------------------------------|------------------|-------|----------------------------------|------------------|-------|----------------------------------|------------------|
|                                     | Event          | Incidence per 1,000 person-years | Event  | Unvaccinated                     |                  |       | Incompletely vaccinated          |                  |       | Fully vaccinated                 |                  |       | Received booster dose            |                  |
|                                     |                |                                  | Event  | Incidence per 1,000 person-years | Hazard ratio     | Event | Incidence per 1,000 person-years | Hazard ratio     | Event | Incidence per 1,000 person-years | Hazard ratio     | Event | Incidence per 1,000 person-years | Hazard ratio     |
| Major CVD                           | 1,248          | 3.72 (3.52,3.93)                 | 2,983  | 9.17 (8.85,9.50)                 | 2.46 (2.02,3.00) | 1,906 | 5.79 (5.54,6.06)                 | 1.56 (1.21,2.00) | 1,431 | 4.29 (4.07,4.52)                 | 1.15 (0.95,1.39) | 1,850 | 5.50 (5.25,5.76)                 | 1.48 (0.86,2.55) |
| Stroke                              | 816            | 2.37 (2.21,2.53)                 | 1,474  | 4.40 (4.18,4.63)                 | 1.86 (1.41,2.46) | 933   | 2.76 (2.58,2.94)                 | 1.17 (0.81,1.68) | 751   | 2.19 (2.04,2.35)                 | 0.93 (0.72,1.19) | 1,194 | 3.43 (3.24,3.63)                 | 1.45 (0.63,3.33) |
| Myocardial infarction               | 206            | 0.58 (0.50,0.66)                 | 630    | 1.81 (1.68,1.96)                 | 3.13 (2.12,4.60) | 181   | 0.52 (0.45,0.60)                 | 0.89 (0.40,1.97) | 227   | 0.64 (0.56,0.73)                 | 1.11 (0.68,1.80) | 163   | 0.46 (0.39,0.53)                 | 0.79 (0.41,1.51) |
| Heart Failure                       | 376            | 1.07 (0.96,1.18)                 | 1,247  | 3.62 (3.43,3.83)                 | 3.39 (2.55,4.52) | 702   | 2.02 (1.87,2.17)                 | 1.89 (1.30,2.75) | 565   | 1.61 (1.48,1.75)                 | 1.51 (1.08,2.12) | 557   | 1.57 (1.44,1.70)                 | 1.47 (0.97,2.21) |
| Atrial fibrillation                 | 241            | 0.69 (0.60,0.78)                 | 514    | 1.50 (1.38,1.64)                 | 2.19 (1.46,3.28) | 425   | 1.23 (1.12,1.35)                 | 1.80 (1.07,3.01) | 283   | 0.81 (0.72,0.91)                 | 1.18 (0.75,1.85) | 247   | 0.70 (0.62,0.79)                 | 1.02 (0.63,1.65) |
| Coronary Artery Disease             | 335            | 0.96 (0.86,1.07)                 | 1,019  | 2.99 (2.81,3.18)                 | 3.10 (2.25,4.28) | 509   | 1.49 (1.36,1.62)                 | 1.54 (0.93,2.55) | 493   | 1.43 (1.30,1.56)                 | 1.48 (1.07,2.04) | 452   | 1.30 (1.18,1.42)                 | 1.34 (0.94,1.91) |
| Deep vein thrombosis                | 77             | 0.22 (0.17,0.27)                 | 160    | 0.46 (0.39,0.54)                 | 2.12 (0.97,4.60) | 181   | 0.52 (0.44,0.59)                 | 2.37 (1.10,5.09) | 123   | 0.35 (0.29,0.41)                 | 1.60 (0.81,3.17) | 46    | 0.13 (0.10,0.17)                 | 0.60 (0.23,1.55) |
| Cardiovascular mortality            | 582            | 1.63 (1.51,1.77)                 | 1,568  | 4.49 (4.27,4.72)                 | 2.75 (2.14,3.52) | 700   | 1.99 (1.85,2.14)                 | 1.22 (0.83,1.78) | 547   | 1.55 (1.42,1.68)                 | 0.95 (0.67,1.33) | 345   | 0.96 (0.86,1.07)                 | 0.59 (0.35,1.00) |
| Chronic pulmonary disease           | 116            | 0.33 (0.28,0.40)                 | 154    | 0.45 (0.38,0.53)                 | 1.36 (0.63,2.93) | 220   | 0.64 (0.56,0.73)                 | 1.92 (0.84,4.43) | 171   | 0.49 (0.42,0.57)                 | 1.49 (0.84,2.64) | 74    | 0.21 (0.16,0.26)                 | 0.63 (0.28,1.42) |
| Acute respiratory distress syndrome | 220            | 0.62 (0.54,0.71)                 | 425    | 1.23 (1.11,1.35)                 | 1.97 (1.18,3.31) | 403   | 1.15 (1.04,1.27)                 | 1.86 (1.00,3.46) | 234   | 0.66 (0.58,0.75)                 | 1.07 (0.68,1.69) | 284   | 0.79 (0.71,0.89)                 | 1.28 (0.76,2.15) |
| Seizure                             | 129            | 0.37 (0.31,0.43)                 | 394    | 1.14 (1.03,1.26)                 | 3.12 (1.75,5.57) | 300   | 0.86 (0.77,0.96)                 | 2.36 (1.10,5.07) | 130   | 0.37 (0.31,0.43)                 | 1.01 (0.52,1.94) | 99    | 0.28 (0.23,0.34)                 | 0.76 (0.33,1.73) |
| End-stage renal disease             | 34             | 0.10 (0.07,0.13)                 | 26     | 0.08 (0.05,0.11)                 | 0.79 (0.24,2.63) | 0     | NA                               | NA               | 41    | 0.12 (0.08,0.15)                 | 1.20 (0.41,3.53) | 7     | 0.02 (0.01,0.04)                 | 0.20 (0.03,1.50) |
| Acute kidney injury                 | 101            | 0.28 (0.23,0.34)                 | 352    | 1.01 (0.91,1.12)                 | 3.57 (2.11,6.02) | 167   | 0.48 (0.41,0.55)                 | 1.68 (0.74,3.84) | 144   | 0.41 (0.35,0.48)                 | 1.44 (0.72,2.88) | 134   | 0.37 (0.31,0.44)                 | 1.31 (0.59,2.91) |
| Pancreatitis                        | 74             | 0.21 (0.16,0.26)                 | 225    | 0.65 (0.57,0.74)                 | 3.12 (1.46,6.70) | 119   | 0.34 (0.28,0.41)                 | 1.65 (0.55,4.92) | 95    | 0.27 (0.22,0.33)                 | 1.30 (0.60,2.83) | 78    | 0.22 (0.17,0.27)                 | 1.05 (0.48,2.29) |
| All-cause mortality                 | 3,479          | 9.78 (9.46,10.11)                | 12,749 | 36.53 (35.90,37.17)              | 3.73 (3.40,4.09) | 5,808 | 16.55 (16.13,16.98)              | 1.69 (1.48,1.94) | 3,900 | 11.02 (10.68,11.37)              | 1.13 (0.99,1.28) | 3,201 | 8.91 (8.60,9.22)                 | 0.91 (0.74,1.12) |

Note: CI: confidence interval, REF: Reference group; Major CVD: Major Cardiovascular Disease; Composite outcome of stroke, heart failure and coronary artery disease

Hazard Ratio (HR) and 95% Confidence Interval (95% CI) were estimated by Cox regression, HR >1 (or <1) indicates patients with COVID-19 had higher (lower) risk of sequelae compared to the non-COVID-19 control cohort

Un-vaccinated, Incomplete vaccinated, Fully Vaccinated and Received booster dose of COVID-19 vaccines refers to patients who have received 0 dose, 1 doses, 2 doses and ≥3 doses of BioNtech or CoronaVac COVID-19 vaccines, respectively

**Supplementary Table 18. Incidence rate and hazard ratio of clinical sequelae in COVID-19 and non-COVID-19 cohort after weighting during 0-30, 31-90, 91-180, 181-270, 271-365 days of SARS-CoV-2 infection (Female patients; continued)**

**91-180 days**

| Clinical sequelae                   | Controls (REF) |                                  | COVID-19     |                                  |                  |                         |                                  |                  |                  |                                  |                  |                       |                                  |                  |
|-------------------------------------|----------------|----------------------------------|--------------|----------------------------------|------------------|-------------------------|----------------------------------|------------------|------------------|----------------------------------|------------------|-----------------------|----------------------------------|------------------|
|                                     | Event          | Incidence per 1,000 person-years | Unvaccinated |                                  |                  | Incompletely vaccinated |                                  |                  | Fully vaccinated |                                  |                  | Received booster dose |                                  |                  |
|                                     |                |                                  | Event        | Incidence per 1,000 person-years | Hazard ratio     | Event                   | Incidence per 1,000 person-years | Hazard ratio     | Event            | Incidence per 1,000 person-years | Hazard ratio     | Event                 | Incidence per 1,000 person-years | Hazard ratio     |
| Major CVD                           | 1,763          | 4.09 (3.90,4.28)                 | 2,949        | 6.54 (6.31,6.78)                 | 1.60 (1.31,1.96) | 2,555                   | 5.35 (5.14,5.55)                 | 1.31 (1.04,1.65) | 1,808            | 3.81 (3.63,3.98)                 | 0.93 (0.79,1.10) | 1,307                 | 3.59 (3.40,3.79)                 | 0.87 (0.72,1.06) |
| Stroke                              | 1,134          | 2.56 (2.41,2.71)                 | 1,415        | 3.04 (2.89,3.20)                 | 1.19 (0.90,1.58) | 1,504                   | 3.05 (2.90,3.21)                 | 1.20 (0.88,1.63) | 1,065            | 2.18 (2.05,2.32)                 | 0.86 (0.69,1.06) | 594                   | 1.58 (1.45,1.71)                 | 0.61 (0.47,0.81) |
| Myocardial infarction               | 260            | 0.57 (0.51,0.64)                 | 831          | 1.72 (1.61,1.84)                 | 3.00 (2.01,4.50) | 582                     | 1.15 (1.06,1.24)                 | 2.00 (1.25,3.19) | 266              | 0.53 (0.47,0.60)                 | 0.93 (0.59,1.45) | 273                   | 0.71 (0.63,0.80)                 | 1.25 (0.79,1.98) |
| Heart Failure                       | 440            | 0.97 (0.88,1.07)                 | 862          | 1.80 (1.69,1.93)                 | 1.86 (1.33,2.59) | 670                     | 1.33 (1.23,1.43)                 | 1.37 (0.92,2.05) | 678              | 1.36 (1.26,1.47)                 | 1.40 (1.05,1.88) | 405                   | 1.06 (0.96,1.16)                 | 1.08 (0.73,1.60) |
| Atrial fibrillation                 | 336            | 0.74 (0.67,0.83)                 | 598          | 1.26 (1.16,1.36)                 | 1.69 (1.10,2.60) | 445                     | 0.89 (0.81,0.97)                 | 1.20 (0.75,1.92) | 414              | 0.83 (0.76,0.92)                 | 1.12 (0.80,1.58) | 372                   | 0.97 (0.88,1.07)                 | 1.30 (0.80,2.11) |
| Coronary Artery Disease             | 519            | 1.16 (1.06,1.26)                 | 1,253        | 2.65 (2.50,2.80)                 | 2.28 (1.66,3.11) | 847                     | 1.70 (1.59,1.82)                 | 1.46 (1.01,2.12) | 528              | 1.08 (0.99,1.17)                 | 0.92 (0.68,1.25) | 492                   | 1.31 (1.20,1.43)                 | 1.13 (0.82,1.56) |
| Deep vein thrombosis                | 83             | 0.18 (0.15,0.23)                 | 213          | 0.44 (0.38,0.50)                 | 2.41 (1.16,5.01) | 271                     | 0.53 (0.47,0.60)                 | 2.92 (1.30,6.56) | 54               | 0.11 (0.08,0.14)                 | 0.59 (0.25,1.40) | 20                    | 0.05 (0.03,0.08)                 | 0.28 (0.06,1.23) |
| Cardiovascular mortality            | 674            | 1.47 (1.37,1.59)                 | 1,618        | 3.34 (3.18,3.50)                 | 2.27 (1.76,2.92) | 949                     | 1.86 (1.74,1.98)                 | 1.27 (0.91,1.77) | 511              | 1.01 (0.93,1.10)                 | 0.69 (0.49,0.97) | 191                   | 0.49 (0.43,0.57)                 | 0.33 (0.18,0.61) |
| Chronic pulmonary disease           | 164            | 0.36 (0.31,0.42)                 | 379          | 0.80 (0.72,0.88)                 | 2.19 (1.18,4.07) | 426                     | 0.85 (0.77,0.93)                 | 2.35 (1.23,4.50) | 209              | 0.42 (0.37,0.48)                 | 1.17 (0.72,1.88) | 132                   | 0.35 (0.29,0.41)                 | 0.94 (0.42,2.09) |
| Acute respiratory distress syndrome | 287            | 0.63 (0.56,0.70)                 | 649          | 1.35 (1.25,1.45)                 | 2.15 (1.40,3.30) | 528                     | 1.04 (0.95,1.13)                 | 1.66 (0.99,2.78) | 485              | 0.97 (0.88,1.06)                 | 1.54 (1.12,2.13) | 217                   | 0.56 (0.49,0.64)                 | 0.89 (0.36,2.18) |
| Seizure                             | 180            | 0.40 (0.34,0.46)                 | 386          | 0.81 (0.73,0.89)                 | 2.05 (1.16,3.62) | 501                     | 0.99 (0.90,1.08)                 | 2.53 (1.38,4.63) | 215              | 0.43 (0.38,0.49)                 | 1.09 (0.67,1.78) | 79                    | 0.20 (0.16,0.25)                 | 0.51 (0.24,1.06) |
| End-stage renal disease             | 52             | 0.11 (0.08,0.15)                 | 54           | 0.11 (0.08,0.14)                 | 0.98 (0.26,3.64) | 11                      | 0.02 (0.01,0.04)                 | 0.19 (0.03,1.42) | 23               | 0.05 (0.03,0.07)                 | 0.41 (0.09,1.79) | 0                     | NA                               | NA               |
| Acute kidney injury                 | 166            | 0.36 (0.31,0.42)                 | 287          | 0.59 (0.53,0.67)                 | 1.66 (0.91,3.02) | 121                     | 0.24 (0.20,0.28)                 | 0.67 (0.28,1.59) | 192              | 0.38 (0.33,0.44)                 | 1.07 (0.62,1.85) | 74                    | 0.19 (0.15,0.24)                 | 0.51 (0.18,1.48) |
| Pancreatitis                        | 86             | 0.19 (0.15,0.23)                 | 98           | 0.20 (0.16,0.24)                 | 1.08 (0.38,3.06) | 37                      | 0.07 (0.05,0.10)                 | 0.39 (0.12,1.29) | 91               | 0.18 (0.15,0.22)                 | 0.96 (0.44,2.09) | 31                    | 0.08 (0.06,0.11)                 | 0.43 (0.15,1.21) |
| All-cause mortality                 | 4,471          | 9.77 (9.49,10.06)                | 10,306       | 21.25 (20.84,21.66)              | 2.18 (1.97,2.40) | 5,830                   | 11.43 (11.14,11.72)              | 1.17 (1.02,1.34) | 3,995            | 7.94 (7.69,8.19)                 | 0.81 (0.72,0.92) | 2,183                 | 5.63 (5.40,5.87)                 | 0.57 (0.45,0.73) |

Note: CI: confidence interval, REF: Reference group; Major CVD: Major Cardiovascular Disease; Composite outcome of stroke, heart failure and coronary artery disease

Hazard Ratio (HR) and 95% Confidence Interval (95% CI) were estimated by Cox regression, HR >1 (or <1) indicates patients with COVID-19 had higher (lower) risk of sequelae compared to the non-COVID-19 control cohort

Un-vaccinated, Incomplete vaccinated, Fully Vaccinated and Received booster dose of COVID-19 vaccines refers to patients who have received 0 dose, 1 doses, 2 doses and ≥3 doses of BioNtech or CoronaVac COVID-19 vaccines, respectively

**Supplementary Table 18. Incidence rate and hazard ratio of clinical sequelae in COVID-19 and non-COVID-19 cohort after weighting during 0-30, 31-90, 91-180, 181-270, 271-365 days of SARS-CoV-2 infection (Female patients; continued)**

**181-270 days**

| Clinical sequelae                   | Controls (REF) |                                  |              | COVID-19                         |                  |                         |                                  |                  |                  |                                  |                  |                       |                                  |                  |
|-------------------------------------|----------------|----------------------------------|--------------|----------------------------------|------------------|-------------------------|----------------------------------|------------------|------------------|----------------------------------|------------------|-----------------------|----------------------------------|------------------|
|                                     | Event          | Incidence per 1,000 person-years | Unvaccinated |                                  |                  | Incompletely vaccinated |                                  |                  | Fully vaccinated |                                  |                  | Received booster dose |                                  |                  |
|                                     |                |                                  | Event        | Incidence per 1,000 person-years | Hazard ratio     | Event                   | Incidence per 1,000 person-years | Hazard ratio     | Event            | Incidence per 1,000 person-years | Hazard ratio     | Event                 | Incidence per 1,000 person-years | Hazard ratio     |
| Major CVD                           | 1,405          | 4.15 (3.94,4.37)                 | 2,174        | 6.39 (6.12,6.66)                 | 1.54 (1.24,1.90) | 2,122                   | 6.01 (5.76,6.27)                 | 1.45 (1.16,1.80) | 1,459            | 4.18 (3.97,4.40)                 | 1.01 (0.85,1.19) | 1,123                 | 1.88 (1.77,1.99)                 | 0.45 (0.23,0.90) |
| Stroke                              | 885            | 2.54 (2.38,2.72)                 | 1,293        | 3.68 (3.49,3.89)                 | 1.45 (1.10,1.91) | 1,167                   | 3.21 (3.03,3.40)                 | 1.26 (0.94,1.69) | 1,060            | 2.95 (2.78,3.13)                 | 1.16 (0.78,1.72) | 662                   | 1.03 (0.95,1.11)                 | 0.40 (0.22,0.74) |
| Myocardial infarction               | 244            | 0.68 (0.60,0.77)                 | 327          | 0.90 (0.80,1.00)                 | 1.32 (0.83,2.08) | 480                     | 1.28 (1.17,1.40)                 | 1.87 (1.16,3.02) | 265              | 0.72 (0.63,0.81)                 | 1.05 (0.68,1.63) | 138                   | 0.22 (0.19,0.26)                 | 0.32 (0.13,0.78) |
| Heart Failure                       | 381            | 1.07 (0.97,1.18)                 | 1,086        | 3.00 (2.83,3.19)                 | 2.81 (2.11,3.74) | 738                     | 1.98 (1.84,2.12)                 | 1.85 (1.30,2.62) | 360              | 0.98 (0.88,1.08)                 | 0.92 (0.63,1.34) | 661                   | 1.00 (0.93,1.08)                 | 0.94 (0.27,3.27) |
| Atrial fibrillation                 | 268            | 0.75 (0.67,0.85)                 | 601          | 1.67 (1.54,1.81)                 | 2.22 (1.51,3.25) | 454                     | 1.22 (1.12,1.34)                 | 1.62 (1.01,2.62) | 421              | 1.15 (1.05,1.27)                 | 1.53 (1.08,2.16) | 252                   | 0.38 (0.34,0.43)                 | 0.50 (0.22,1.18) |
| Coronary Artery Disease             | 433            | 1.24 (1.12,1.36)                 | 577          | 1.61 (1.49,1.75)                 | 1.31 (0.90,1.89) | 699                     | 1.90 (1.77,2.05)                 | 1.54 (1.05,2.26) | 582              | 1.61 (1.48,1.75)                 | 1.30 (0.98,1.73) | 210                   | 0.34 (0.30,0.39)                 | 0.28 (0.13,0.61) |
| Deep vein thrombosis                | 70             | 0.19 (0.15,0.24)                 | 70           | 0.19 (0.15,0.24)                 | 0.99 (0.40,2.44) | 42                      | 0.11 (0.08,0.15)                 | 0.57 (0.14,2.35) | 68               | 0.18 (0.14,0.23)                 | 0.95 (0.43,2.06) | 0                     | NA                               | NA               |
| Cardiovascular mortality            | 449            | 1.25 (1.14,1.37)                 | 857          | 2.34 (2.19,2.50)                 | 1.88 (1.38,2.55) | 573                     | 1.52 (1.40,1.65)                 | 1.22 (0.84,1.78) | 379              | 1.02 (0.92,1.13)                 | 0.82 (0.52,1.29) | 307                   | 0.46 (0.41,0.52)                 | 0.37 (0.13,1.03) |
| Chronic pulmonary disease           | 135            | 0.38 (0.32,0.45)                 | 343          | 0.95 (0.86,1.06)                 | 2.49 (1.42,4.35) | 285                     | 0.77 (0.68,0.86)                 | 2.01 (1.09,3.68) | 170              | 0.47 (0.40,0.54)                 | 1.22 (0.77,1.93) | 114                   | 0.21 (0.17,0.25)                 | 0.56 (0.25,1.26) |
| Acute respiratory distress syndrome | 217            | 0.61 (0.53,0.69)                 | 462          | 1.27 (1.16,1.39)                 | 2.09 (1.29,3.38) | 161                     | 0.43 (0.37,0.50)                 | 0.70 (0.35,1.42) | 214              | 0.58 (0.51,0.66)                 | 0.96 (0.62,1.48) | 247                   | 0.37 (0.33,0.42)                 | 0.62 (0.25,1.55) |
| Seizure                             | 140            | 0.39 (0.33,0.46)                 | 407          | 1.12 (1.02,1.24)                 | 2.88 (1.68,4.94) | 293                     | 0.78 (0.70,0.88)                 | 2.01 (1.09,3.73) | 83               | 0.22 (0.18,0.28)                 | 0.58 (0.26,1.27) | 21                    | 0.03 (0.02,0.05)                 | 0.08 (0.02,0.36) |
| End-stage renal disease             | 21             | 0.06 (0.04,0.09)                 | 58           | 0.16 (0.12,0.20)                 | 2.70 (0.87,8.34) | 61                      | 0.16 (0.13,0.21)                 | 2.74 (0.88,8.50) | 43               | 0.12 (0.08,0.15)                 | 1.96 (0.68,5.67) | 0                     | NA                               | NA               |
| Acute kidney injury                 | 144            | 0.40 (0.34,0.47)                 | 221          | 0.61 (0.53,0.69)                 | 1.51 (0.84,2.70) | 185                     | 0.49 (0.43,0.57)                 | 1.22 (0.60,2.50) | 122              | 0.33 (0.27,0.39)                 | 0.82 (0.40,1.67) | 19                    | 0.03 (0.02,0.05)                 | 0.07 (0.01,0.56) |
| Pancreatitis                        | 90             | 0.25 (0.20,0.31)                 | 183          | 0.50 (0.43,0.58)                 | 2.01 (0.92,4.38) | 48                      | 0.13 (0.09,0.17)                 | 0.51 (0.11,2.32) | 90               | 0.24 (0.20,0.30)                 | 0.97 (0.52,1.82) | 47                    | 0.07 (0.05,0.09)                 | 0.28 (0.08,1.06) |
| All-cause mortality                 | 3,737          | 10.40 (10.07,10.74)              | 7,342        | 20.03 (19.57,20.49)              | 1.93 (1.73,2.15) | 4,463                   | 11.83 (11.49,12.18)              | 1.14 (0.99,1.31) | 2,658            | 7.17 (6.90,7.45)                 | 0.69 (0.58,0.82) | 3,553                 | 5.37 (5.20,5.55)                 | 0.52 (0.24,1.11) |

Note: CI: confidence interval, REF: Reference group; Major CVD: Major Cardiovascular Disease; Composite outcome of stroke, heart failure and coronary artery disease

Hazard Ratio (HR) and 95% Confidence Interval (95% CI) were estimated by Cox regression, HR >1 (or <1) indicates patients with COVID-19 had higher (lower) risk of sequelae compared to the non-COVID-19 control cohort

Un-vaccinated, Incomplete vaccinated, Fully Vaccinated and Received booster dose of COVID-19 vaccines refers to patients who have received 0 dose, 1 doses, 2 doses and ≥3 doses of BioNtech or CoronaVac COVID-19 vaccines, respectively

**Supplementary Table 18. Incidence rate and hazard ratio of clinical sequelae in COVID-19 and non-COVID-19 cohort after weighting during 0-30, 31-90, 91-180, 181-270, 271-365 days of SARS-CoV-2 infection (Female patients; continued)**

**271-365 days**

| Clinical sequelae                   | Controls (REF) |                                  | COVID-19 |                                  |                   |       |                                  |                   |       |                                  |                  |         |                                  |                     |
|-------------------------------------|----------------|----------------------------------|----------|----------------------------------|-------------------|-------|----------------------------------|-------------------|-------|----------------------------------|------------------|---------|----------------------------------|---------------------|
|                                     | Event          | Incidence per 1,000 person-years | Event    | Incidence per 1,000 person-years | Hazard ratio      | Event | Incidence per 1,000 person-years | Hazard ratio      | Event | Incidence per 1,000 person-years | Hazard ratio     | Event   | Incidence per 1,000 person-years | Hazard ratio        |
| Major CVD                           | 859            | 4.39 (4.10,4.69)                 | 1,164    | 5.67 (5.35,6.00)                 | 1.39 (1.04,1.86)  | 938   | 5.02 (4.71,5.35)                 | 1.13 (0.82,1.55)  | 737   | 3.83 (3.56,4.11)                 | 0.88 (0.70,1.10) | 129,106 | 55.81 (55.50,56.11)              | 12.15 (1.37,108.14) |
| Stroke                              | 508            | 2.52 (2.31,2.75)                 | 608      | 2.88 (2.66,3.12)                 | 1.21 (0.81,1.82)  | 440   | 2.29 (2.08,2.51)                 | 0.90 (0.56,1.44)  | 394   | 1.99 (1.80,2.19)                 | 0.79 (0.58,1.08) | 129,044 | 51.20 (50.92,51.48)              | 19.49 (2.25,168.59) |
| Myocardial infarction               | 171            | 0.83 (0.71,0.96)                 | 206      | 0.95 (0.82,1.08)                 | 1.21 (0.64,2.30)  | 207   | 1.05 (0.91,1.20)                 | 1.25 (0.65,2.38)  | 157   | 0.77 (0.66,0.90)                 | 0.93 (0.54,1.60) | 34      | 0.01 (0.01,0.02)                 | 0.02 (0.00,0.08)    |
| Heart Failure                       | 274            | 1.33 (1.18,1.49)                 | 617      | 2.85 (2.63,3.09)                 | 2.31 (1.60,3.33)  | 457   | 2.32 (2.11,2.54)                 | 1.72 (1.18,2.51)  | 329   | 1.63 (1.46,1.81)                 | 1.22 (0.83,1.80) | 129     | 0.05 (0.04,0.06)                 | 0.04 (0.01,0.13)    |
| Atrial fibrillation                 | 153            | 0.74 (0.63,0.87)                 | 281      | 1.31 (1.16,1.47)                 | 1.93 (1.06,3.51)  | 205   | 1.05 (0.91,1.20)                 | 1.38 (0.74,2.58)  | 155   | 0.77 (0.66,0.90)                 | 1.04 (0.61,1.76) | 61,511  | 23.94 (23.75,24.12)              | 30.68 (3.53,266.88) |
| Coronary Artery Disease             | 272            | 1.34 (1.19,1.51)                 | 288      | 1.35 (1.20,1.51)                 | 1.06 (0.61,1.86)  | 369   | 1.90 (1.71,2.10)                 | 1.40 (0.84,2.32)  | 203   | 1.02 (0.89,1.17)                 | 0.76 (0.48,1.19) | 107     | 0.04 (0.04,0.05)                 | 0.03 (0.01,0.11)    |
| Deep vein thrombosis                | 29             | 0.14 (0.10,0.20)                 | 76       | 0.35 (0.28,0.44)                 | 2.59 (0.89,7.58)  | 31    | 0.16 (0.11,0.22)                 | 1.09 (0.26,4.64)  | 6     | 0.03 (0.01,0.06)                 | 0.19 (0.03,1.44) | 12      | 0.01 (0.00,0.01)                 | 0.04 (0.00,0.37)    |
| Cardiovascular mortality            | 40             | 0.19 (0.14,0.26)                 | 119      | 0.54 (0.45,0.65)                 | 2.42 (0.96,6.09)  | 24    | 0.12 (0.08,0.17)                 | 0.66 (0.09,4.79)  | 0     | NA                               | NA               | 0       | NA                               | NA                  |
| Chronic pulmonary disease           | 103            | 0.50 (0.42,0.61)                 | 171      | 0.80 (0.68,0.92)                 | 1.71 (0.80,3.63)  | 188   | 0.96 (0.83,1.10)                 | 1.88 (0.94,3.75)  | 100   | 0.50 (0.41,0.60)                 | 0.98 (0.51,1.87) | 14      | 0.01 (0.00,0.01)                 | 0.02 (0.00,0.14)    |
| Acute respiratory distress syndrome | 118            | 0.57 (0.47,0.68)                 | 62       | 0.29 (0.22,0.36)                 | 0.54 (0.17,1.67)  | 236   | 1.19 (1.05,1.35)                 | 2.06 (1.11,3.82)  | 112   | 0.55 (0.45,0.66)                 | 0.96 (0.47,1.95) | 55      | 0.02 (0.02,0.03)                 | 0.04 (0.01,0.20)    |
| Seizure                             | 78             | 0.38 (0.30,0.47)                 | 107      | 0.49 (0.40,0.59)                 | 1.37 (0.54,3.48)  | 152   | 0.77 (0.66,0.90)                 | 2.04 (0.89,4.67)  | 53    | 0.26 (0.20,0.34)                 | 0.70 (0.33,1.46) | 33      | 0.01 (0.01,0.02)                 | 0.03 (0.00,0.32)    |
| End-stage renal disease             | 14             | 0.07 (0.04,0.11)                 | 48       | 0.22 (0.17,0.29)                 | 3.48 (0.92,13.24) | 36    | 0.18 (0.13,0.24)                 | 2.56 (0.56,11.75) | 0     | NA                               | NA               | 0       | NA                               | NA                  |
| Acute kidney injury                 | 60             | 0.29 (0.22,0.37)                 | 36       | 0.17 (0.12,0.23)                 | 0.62 (0.21,1.86)  | 49    | 0.25 (0.19,0.33)                 | 0.85 (0.26,2.76)  | 57    | 0.28 (0.21,0.36)                 | 0.96 (0.37,2.46) | 975     | 0.38 (0.36,0.40)                 | 1.28 (0.14,11.34)   |
| Pancreatitis                        | 54             | 0.26 (0.20,0.33)                 | 46       | 0.21 (0.16,0.28)                 | 0.87 (0.15,5.09)  | 64    | 0.32 (0.25,0.41)                 | 1.23 (0.34,4.40)  | 13    | 0.06 (0.04,0.11)                 | 0.25 (0.06,1.09) | 23      | 0.01 (0.01,0.01)                 | 0.03 (0.00,0.29)    |
| All-cause mortality                 | 2,030          | 9.78 (9.36,10.21)                | 4,465    | 20.39 (19.80,21.00)              | 2.22 (1.93,2.56)  | 1,666 | 8.38 (7.99,8.79)                 | 0.85 (0.68,1.05)  | 1,811 | 8.88 (8.48,9.30)                 | 0.90 (0.58,1.42) | 488     | 0.19 (0.17,0.21)                 | 0.02 (0.01,0.06)    |

Note: CI: confidence interval, REF: Reference group; Major CVD: Major Cardiovascular Disease; Composite outcome of stroke, heart failure and coronary artery disease

Hazard Ratio (HR) and 95% Confidence Interval (95% CI) were estimated by Cox regression, HR >1 (or <1) indicates patients with COVID-19 had higher (lower) risk of sequelae compared to the non-COVID-19 control cohort

Un-vaccinated, Incomplete vaccinated, Fully Vaccinated and Received booster dose of COVID-19 vaccines refers to patients who have received 0 dose, 1 doses, 2 doses and ≥3 doses of BioNtech or CoronaVac COVID-19 vaccines, respectively

Day 0-30

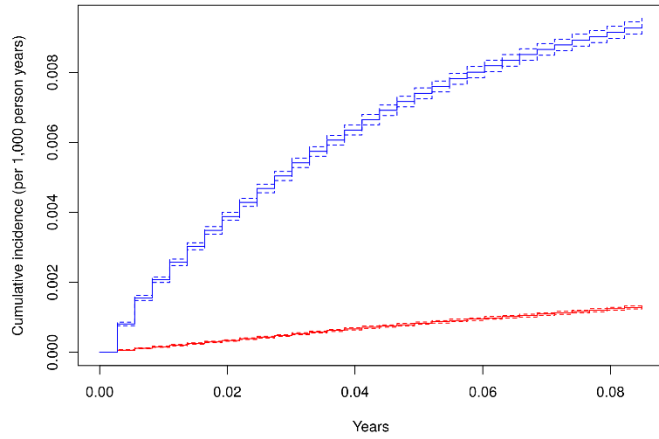

Day 31-90

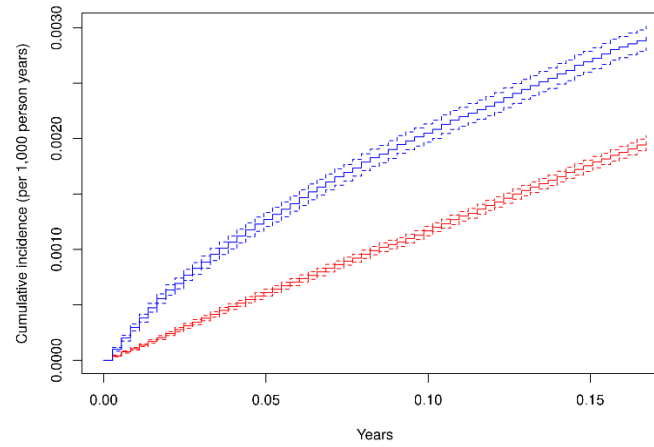

Day 91-180

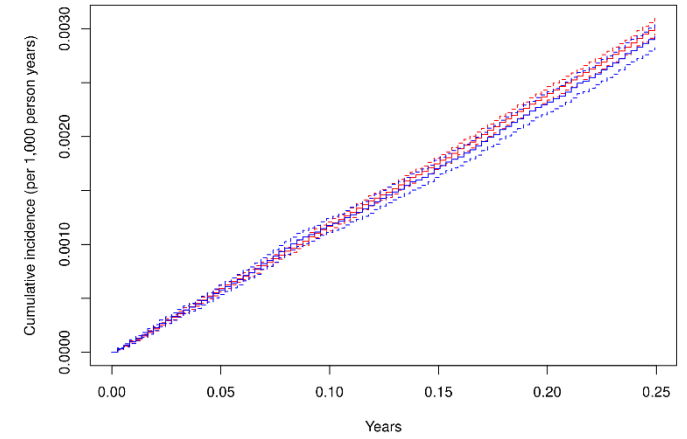

Day 181-270

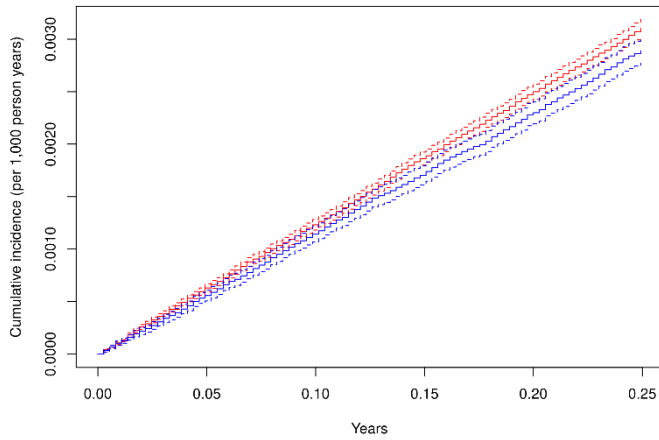

Day 271-365

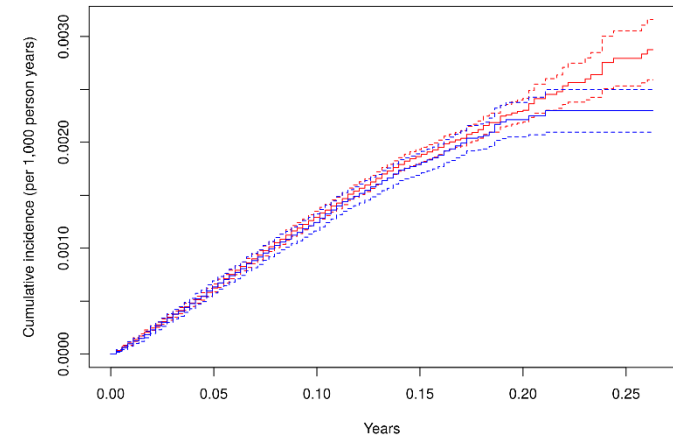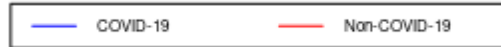

**Supplementary Figure 1. Cumulative incidence plot for clinical sequelae during 0-30, 31-90, 91-180, 181-270, 271-365 days of SARS-CoV-2 infection**

The number of patients at risk at each observation period between day 0-30, 31-90, 91-180, 181-270, 271-365 were n=2,815,023, n=2,801,396, n=2,764,243, n=2,119,507 and n=1,876,858, respectively. Dotted lines represented the 95% confidence intervals
